# Supplementary material for: Activity and degradation of Pt–Co and Pt–Ni alloy catalysts for application in high-temperature PEM fuel cells
Source: Royal Society of Chemistry journal article supplement (doi:10.1039/d5ey00279f), 2026-01-01
Supplement: d5ey00279f2.zip [file SI_XAS_parameters.pdf › SI_XAS_parameters.pdf]

| HIS0_Pt_L2,3_FLUO |        |       |                   |
|-------------------|--------|-------|-------------------|
| #                 | Pt-Pt  | Pt-O  | R-factor filtered |
| R [Å]             | 2,749  | 2,019 | 9,72              |
| error             | 0,014  | 0,026 |                   |
| s [Å]             | 0,0864 | 0,1*  |                   |
| error (inactive)  | 0,016  |       |                   |
| N                 | 3,48   | 2,9   |                   |
| error             | 1,6    | 0,51  |                   |
| 2s2               | 0,0149 | 0,02* |                   |
| error             | 0,0054 |       |                   |

| HIS1_Pt_L2,3_FLUO |        |  |                   |
|-------------------|--------|--|-------------------|
| #                 | Pt-Pt  |  | R-factor filtered |
| R [Å]             | 2,749  |  | 9,72              |
| error             | 0,006  |  |                   |
| s [Å]             | 0,0783 |  |                   |
| error (inactive)  | 0,0053 |  |                   |
| N                 | 8,99   |  |                   |
| error             | 1,3    |  |                   |
| 2s2               | 0,0123 |  |                   |
| error             | 0,0016 |  |                   |

| HIS3_Pt_L2,3_FLUO |        |  |                   |
|-------------------|--------|--|-------------------|
| #                 | Pt-Pt  |  | R-factor filtered |
| R [Å]             | 2,756  |  | 9,72              |
| error             | 0,006  |  |                   |
| s [Å]             | 0,0784 |  |                   |
| error (inactive)  | 0,0053 |  |                   |
| N                 | 8,96   |  |                   |
| error             | 1,3    |  |                   |
| 2s2               | 0,0123 |  |                   |
| error             | 0,0017 |  |                   |

| HIS8_Pt_L2,3_FLUO |        |  |                   |
|-------------------|--------|--|-------------------|
| #                 | Pt-Pt  |  | R-factor filtered |
| R [Å]             | 2,758  |  | 9,72              |
| error             | 0,0053 |  |                   |
| s [Å]             | 0,0769 |  |                   |
| error (inactive)  | 0,0048 |  |                   |
| N                 | 9,82   |  |                   |
| error             | 1,3    |  |                   |
| 2s2               | 0,0118 |  |                   |
| error             | 0,0015 |  |                   |

| HIS24_Pt_L2,3_FLUO |        |  |                   |
|--------------------|--------|--|-------------------|
| #                  | Pt-Pt  |  | R-factor filtered |
| R [Å]              | 2,765  |  | 9,72              |
| error              | 0,0035 |  |                   |

|                  |         |
|------------------|---------|
| s [Å]            | 0,0684  |
| error (inactive) | 0,0036  |
| N                | 12,4    |
| error            | 1,1     |
| 2s2              | 0,00937 |
| error            | 0,00098 |

HIS72\_Pt\_L2,3\_FLUO

|                  |        |                   |
|------------------|--------|-------------------|
| #                | Pt-Pt  | R-factor filtered |
| R [Å]            | 2,759  | 9,72              |
| error            | 0,0047 |                   |
| s [Å]            | 0,0755 |                   |
| error (inactive) | 0,0044 |                   |
| N                | 10,7   |                   |
| error            | 1,3    |                   |
| 2s2              | 0,0114 |                   |
| error            | 0,0013 |                   |

KET0\_Pt\_L2,3\_FLUO **Pt-Co/KB**

| #            | Pt-Co   | Pt-Pt  | Pt-O   | R-factor filtered |
|--------------|---------|--------|--------|-------------------|
| R [Å]        | 2,652   | 2,739  | 2,025  | 12,04             |
| error        | 0,018   | 0,02   | 0,02   |                   |
| s [Å]        | 0,0419  | 0,0711 | 0,0797 |                   |
| error (inacc | 0,044   | 0,03   | 0,023  |                   |
| N            | 0,774   | 2,59   | 2,19   |                   |
| error        | 0,75    | 2      | 0,68   |                   |
| 2s2          | 0,00352 | 0,0101 | 0,0127 |                   |
| error        | 0,011   | 0,0077 | 0,0071 |                   |

## KET1\_Pt\_L2,3\_FLUO

| #                  | Pt-Co   | Pt-Pt  | Pt-O   | R-factor filtered |
|--------------------|---------|--------|--------|-------------------|
| R [Å]              | 2,668   | 2,747  | 2,01   | 12,04             |
| error              | 0,022   | 0,01   | 0,068  |                   |
| s [Å]              | 0,0316* | 0,0806 | 0,128  |                   |
| error (inaccurate) |         | 0,011  | 0,056  |                   |
| N                  | 0,479   | 6,49   | 1,2    |                   |
| error              | 0,2     | 2,1    | 1      |                   |
| 2s2                | 0,002*  | 0,013  | 0,0326 |                   |
| error              |         | 0,0035 | 0,035  |                   |

## KET3\_Pt\_L2,3\_FLUO

| #            | Pt-Co    | Pt-Pt  | Pt-O   | R-factor filtered |
|--------------|----------|--------|--------|-------------------|
| R [Å]        | 2,664    | 2,748  | 2,01   | 12,04             |
| error        | 0,031    | 0,0094 | 0,071  |                   |
| s [Å]        | 0,00295  | 0,0832 | 0,142  |                   |
| error (inacc | 0,093    | 0,0087 | 0,06   |                   |
| N            | 0,363    | 8,76   | 1,41   |                   |
| error        | 0,65     | 2,2    | 1,2    |                   |
| 2s2          | 1,75E-05 | 0,0138 | 0,0404 |                   |
| error        | 0,018    | 0,0029 | 0,041  |                   |

## KET8\_Pt\_L2,3\_FLUO

| #                  | Pt-Co   | Pt-Pt  | Pt-O    | R-factor filtered |
|--------------------|---------|--------|---------|-------------------|
| R [Å]              | 2,672   | 2,753  | 2,106   | 12,04             |
| error              | 0,021   | 0,0094 | 0,051   |                   |
| s [Å]              | 0,0316* | 0,0822 | 0,0316* |                   |
| error (inaccurate) |         | 0,0092 |         |                   |
| N                  | 0,499   | 8,22   | 0,345   |                   |
| error              | 0,22    | 2,3    | 0,28    |                   |
| 2s2                | 0,002*  | 0,0135 | 0,002*  |                   |
| error              |         | 0,003  |         |                   |

## KET24\_Pt\_L2,3\_FLUO

| #     | Pt-Co | Pt-Pt | Pt-O  | R-factor filtered |
|-------|-------|-------|-------|-------------------|
| R [Å] | 2,678 | 2,763 | 2,122 | 12,04             |
| error | 0,021 | 0,009 | 0,041 |                   |

|                    |         |        |         |
|--------------------|---------|--------|---------|
| s [Å]              | 0,0316* | 0,0754 | 0,0316* |
| error (inaccurate) |         | 0,0096 |         |
| N                  | 0,504   | 7,61   | 0,45    |
| error              | 0,24    | 2,1    | 0,29    |
| 2s2                | 0,002*  | 0,0114 | 0,002*  |
| error              |         | 0,0029 |         |

# KET72\_Pt\_L2,3\_FLUO

| #                  | Pt-Co   | Pt-Pt  | Pt-O    | R-factor filtered |
|--------------------|---------|--------|---------|-------------------|
| R [Å]              | 2,677   | 2,761  | 2,126   | 12,04             |
| error              | 0,031   | 0,0099 | 0,065   |                   |
| s [Å]              | 0,0316* | 0,0727 | 0,0316* |                   |
| error (inaccurate) |         | 0,013  |         |                   |
| N                  | 0,406   | 6,92   | 0,306   |                   |
| error              | 0,25    | 2,3    | 0,29    |                   |
| 2s2                | 0,002*  | 0,0106 | 0,002*  |                   |
| error              |         | 0,0036 |         |                   |

| KET0_Co_K-edge     |         | Pt-Co/KB |         |                   |
|--------------------|---------|----------|---------|-------------------|
| #                  | Co-Co   | Co-Pt    | Co-O    | R-factor filtered |
| R [Å]              | 2,651   | 2,714    | 2,105   | 10,07             |
| error              | 0,012   | 0,017    | 0,021   |                   |
| s [Å]              | 0,0316* | 0,0999   | 0,0316* |                   |
| error (inaccurate) |         | 0,014    |         |                   |
| N                  | 1,01    | 5,54     | 0,944   |                   |
| error              | 0,18    | 2        | 0,26    |                   |
| 2s2                | 0,002*  | 0,02     | 0,002*  |                   |
| error              |         | 0,0054   |         |                   |

| KET1_Co_K-edge     |         |        |         |                   |
|--------------------|---------|--------|---------|-------------------|
| #                  | Co-Co   | Co-Pt  | Co-O    | R-factor filtered |
| R [Å]              | 2,659   | 2,706  | 2,111   | 10,07             |
| error              | 0,0091  | 0,014  | 0,029   |                   |
| s [Å]              | 0,0316* | 0,0997 | 0,0316* |                   |
| error (inaccurate) |         | 0,011  |         |                   |
| N                  | 1,28    | 7,03   | 0,638   |                   |
| error              | 0,2     | 1,9    | 0,27    |                   |
| 2s2                | 0,002*  | 0,0199 | 0,002*  |                   |
| error              |         | 0,0043 |         |                   |

| KET3_Co_K-edge     |         |        |         |                   |
|--------------------|---------|--------|---------|-------------------|
| #                  | Co-Co   | Co-Pt  | Co-O    | R-factor filtered |
| R [Å]              | 2,661   | 2,714  | 2,088   | 10,07             |
| error              | 0,0072  | 0,016  | 0,032   |                   |
| s [Å]              | 0,0316* | 0,107  | 0,0316* |                   |
| error (inaccurate) |         | 0,012  |         |                   |
| N                  | 1,51    | 6,7    | 0,536   |                   |
| error              | 0,18    | 2,1    | 0,25    |                   |
| 2s2                | 0,002*  | 0,0231 | 0,002*  |                   |
| error              |         | 0,0053 |         |                   |

| KET8_Co_K-edge     |         |        |         |                   |
|--------------------|---------|--------|---------|-------------------|
| #                  | Co-Co   | Co-Pt  | Co-O    | R-factor filtered |
| R [Å]              | 2,659   | 2,72   | 2,122   | 10,07             |
| error              | 0,011   | 0,012  | 0,025   |                   |
| s [Å]              | 0,0316* | 0,0952 | 0,0316* |                   |
| error (inaccurate) |         | 0,011  |         |                   |
| N                  | 1,09    | 6,79   | 0,779   |                   |
| error              | 0,19    | 1,9    | 0,27    |                   |
| 2s2                | 0,002*  | 0,0181 | 0,002*  |                   |
| error              |         | 0,004  |         |                   |

| KET24_Co_K-edge |        |       |       |                   |
|-----------------|--------|-------|-------|-------------------|
| #               | Co-Co  | Co-Pt | Co-O  | R-factor filtered |
| R [Å]           | 2,661  | 2,721 | 2,111 | 10,07             |
| error           | 0,0085 | 0,015 | 0,025 |                   |

|                    |         |        |         |
|--------------------|---------|--------|---------|
| s [Å]              | 0,0316* | 0,108  | 0,0316* |
| error (inaccurate) |         | 0,011  |         |
| N                  | 1,24    | 7,67   | 0,717   |
| error              | 0,18    | 2      | 0,26    |
| 2s2                | 0,002*  | 0,0233 | 0,002*  |
| error              |         | 0,0047 |         |

# KET72\_Co\_K-edge

| #                  | Co-Co   | Co-Pt  | Co-O    | R-factor filtered |
|--------------------|---------|--------|---------|-------------------|
| R [Å]              | 2,667   | 2,718  | 2,121   | 10,07             |
| error              | 0,0093  | 0,012  | 0,027   |                   |
| s [Å]              | 0,0316* | 0,0985 | 0,0316* |                   |
| error (inaccurate) |         | 0,01   |         |                   |
| N                  | 1,28    | 7,19   | 0,675   |                   |
| error              | 0,19    | 1,8    | 0,26    |                   |
| 2s2                | 0,002*  | 0,0194 | 0,002*  |                   |
| error              |         | 0,004  |         |                   |

# GO0\_Pt\_L2,3\_FLUO Pt-Co/rGO

| #                | Pt-Co   | Pt-Pt  | Pt-O   | R-factor filtered |
|------------------|---------|--------|--------|-------------------|
| R [Å]            | 2,646   | 2,711  | 2,013  | 7,326             |
| error            | 0,018   | 0,019  | 0,024  |                   |
| s [Å]            | 0,0598  | 0,0804 | 0,0818 |                   |
| error (inactive) | 0,029   | 0,02   | 0,027  |                   |
| N                | 1,11    | 3,11   | 1,74   |                   |
| error            | 0,81    | 2      | 0,65   |                   |
| 2s2              | 0,00715 | 0,0129 | 0,0134 |                   |
| error            | 0,0085  | 0,0063 | 0,0083 |                   |

# GO1\_Pt\_L2,3\_FLUO

| #                | Pt-Co  | Pt-Pt  | Pt-O   | R-factor filtered |
|------------------|--------|--------|--------|-------------------|
| R [Å]            | 2,663  | 2,729  | 2,005  | 7,326             |
| error            | 0,027  | 0,011  | 0,041  |                   |
| s [Å]            | 0,0781 | 0,0785 | 0,0852 |                   |
| error (inactive) | 0,051  | 0,012  | 0,041  |                   |
| N                | 1,1    | 5,07   | 0,941  |                   |
| error            | 1      | 2,1    | 0,7    |                   |
| 2s2              | 0,0122 | 0,0123 | 0,0145 |                   |
| error            | 0,012  | 0,0037 | 0,017  |                   |

# GO3\_Pt\_L2,3\_FLUO

| #                | Pt-Co  | Pt-Pt  | Pt-O   | R-factor filtered |
|------------------|--------|--------|--------|-------------------|
| R [Å]            | 2,661  | 2,727  | 2,008  | 7,326             |
| error            | 0,029  | 0,011  | 0,04   |                   |
| s [Å]            | 0,0837 | 0,0787 | 0,0753 |                   |
| error (inactive) | 0,044  | 0,012  | 0,044  |                   |
| N                | 1,23   | 5,48   | 0,799  |                   |
| error            | 1,1    | 2,3    | 0,69   |                   |
| 2s2              | 0,014  | 0,0124 | 0,0113 |                   |
| error            | 0,013  | 0,0036 | 0,017  |                   |

# GO8\_Pt\_L2,3\_FLUO

| #                | Pt-Co   | Pt-Pt  | Pt-O   | R-factor filtered |
|------------------|---------|--------|--------|-------------------|
| R [Å]            | 2,656   | 2,727  | 2,016  | 7,326             |
| error            | 0,019   | 0,012  | 0,041  |                   |
| s [Å]            | 0,0626  | 0,0813 | 0,0988 |                   |
| error (inactive) | 0,03    | 0,011  | 0,049  |                   |
| N                | 1,08    | 5,38   | 1,31   |                   |
| error            | 0,86    | 2,1    | 0,8    |                   |
| 2s2              | 0,00784 | 0,0132 | 0,0195 |                   |
| error            | 0,0092  | 0,0036 | 0,017  |                   |

# GO24\_Pt\_L2,3\_FLUO

| #     | Pt-Co | Pt-Pt | Pt-O  | R-factor filtered |
|-------|-------|-------|-------|-------------------|
| R [Å] | 2,648 | 2,722 | 2,016 | 7,326             |
| error | 0,021 | 0,011 | 0,03  |                   |

|                  |        |        |         |
|------------------|--------|--------|---------|
| s [Å]            | 0,0801 | 0,078  | 0,0661  |
| error (inactive) | 0,033  | 0,013  | 0,035   |
| N                | 1,45   | 4,78   | 0,927   |
| error            | 1,1    | 2,1    | 0,6     |
| 2s2              | 0,0128 | 0,0122 | 0,00873 |
| error            | 0,0096 | 0,004  | 0,012   |

#### GO72\_Pt\_L2,3\_FLUO

| #                | Pt-Co  | Pt-Pt  | Pt-O   | R-factor filtered |
|------------------|--------|--------|--------|-------------------|
| R [Å]            | 2,659  | 2,728  | 1,993  | 7,326             |
| error            | 0,03   | 0,01   | 0,042  |                   |
| s [Å]            | 0,0802 | 0,0821 | 0,0884 |                   |
| error (inactive) | 0,035  | 0,01   | 0,041  |                   |
| N                | 0,997  | 5,92   | 0,961  |                   |
| error            | 1,1    | 2,2    | 0,71   |                   |
| 2s2              | 0,0129 | 0,0135 | 0,0156 |                   |
| error            | 0,014  | 0,0034 | 0,018  |                   |



| GO0_Co_K-edge |         | Pt-Co/rGO |         |                   |
|---------------|---------|-----------|---------|-------------------|
| #             | Co-Co   | Co-Pt     | Co-O    | R-factor filtered |
| R [Å]         | 2,64    | 2,671     | 2,067   | 7,275             |
| error         | 0,018   | 0,018     | 0,028   |                   |
| s [Å]         | 0,066   | 0,0918    | 0,0316* |                   |
| error (inacc  | 0,029   | 0,018     |         |                   |
| N             | 1,16    | 4,43      | 0,785   |                   |
| error         | 0,7     | 2,1       | 0,26    |                   |
| 2s2           | 0,00871 | 0,0168    | 0,002*  |                   |
| error         | 0,0093  | 0,0066    |         |                   |

| GO1_Co_K-edge |         |        |         |                   |
|---------------|---------|--------|---------|-------------------|
| #             | Co-Co   | Co-Pt  | Co-O    | R-factor filtered |
| R [Å]         | 2,651   | 2,697  | 2,084   | 7,275             |
| error         | 0,013   | 0,015  | 0,034   |                   |
| s [Å]         | 0,0584  | 0,0907 | 0,0316* |                   |
| error (inacc  | 0,031   | 0,013  |         |                   |
| N             | 1,47    | 5,99   | 0,625   |                   |
| error         | 0,65    | 2      | 0,26    |                   |
| 2s2           | 0,00683 | 0,0164 | 0,002*  |                   |
| error         | 0,0062  | 0,0045 |         |                   |

| GO3_Co_K-edge      |         |        |         |                   |
|--------------------|---------|--------|---------|-------------------|
| #                  | Co-Co   | Co-Pt  | Co-O    | R-factor filtered |
| R [Å]              | 2,658   | 2,704  | 2,113   | 7,275             |
| error              | 0,0097  | 0,014  | 0,024   |                   |
| s [Å]              | 0,0316* | 0,0982 | 0,0316* |                   |
| error (inaccurate) |         | 0,011  |         |                   |
| N                  | 1,23    | 6,64   | 0,772   |                   |
| error              | 0,2     | 2      | 0,27    |                   |
| 2s2                | 0,002*  | 0,0193 | 0,002*  |                   |
| error              |         | 0,0044 |         |                   |

| GO8_Co_K-edge |         |        |         |                   |
|---------------|---------|--------|---------|-------------------|
| #             | Co-Co   | Co-Pt  | Co-O    | R-factor filtered |
| R [Å]         | 2,649   | 2,684  | 2,083   | 7,275             |
| error         | 0,0098  | 0,016  | 0,031   |                   |
| s [Å]         | 0,0525  | 0,0981 | 0,0316* |                   |
| error (inacc  | 0,03    | 0,014  |         |                   |
| N             | 1,62    | 6,29   | 0,679   |                   |
| error         | 0,62    | 2,2    | 0,26    |                   |
| 2s2           | 0,00552 | 0,0192 | 0,002*  |                   |
| error         | 0,0052  | 0,0054 |         |                   |

| GO24_Co_K-edge |        |       |       |                   |
|----------------|--------|-------|-------|-------------------|
| #              | Co-Co  | Co-Pt | Co-O  | R-factor filtered |
| R [Å]          | 2,653  | 2,678 | 2,101 | 7,275             |
| error          | 0,0088 | 0,016 | 0,036 |                   |

|                  |         |        |         |
|------------------|---------|--------|---------|
| s [Å]            | 0,0496  | 0,0986 | 0,0316* |
| error (inactive) | 0,022   | 0,016  |         |
| N                | 1,69    | 6,45   | 0,638   |
| error            | 0,62    | 2,3    | 0,28    |
| 2s2              | 0,00492 | 0,0195 | 0,002*  |
| error            | 0,0053  | 0,0061 |         |

# GO72\_Co\_K-edge

| #                | Co-Co   | Co-Pt  | Co-O    | R-factor filtered |
|------------------|---------|--------|---------|-------------------|
| R [Å]            | 2,66    | 2,709  | 2,11    | 7,275             |
| error            | 0,0098  | 0,019  | 0,029   |                   |
| s [Å]            | 0,033   | 0,0983 | 0,0316* |                   |
| error (inactive) | 0,029   | 0,012  |         |                   |
| N                | 1,22    | 6,84   | 0,74    |                   |
| error            | 0,55    | 2,1    | 0,27    |                   |
| 2s2              | 0,00217 | 0,0193 | 0,002*  |                   |
| error            | 0,0055  | 0,0046 |         |                   |

| Ni0_Pt_L2,3_FLUO <b>Pt-Ni/KB</b> |        |        |                   |
|----------------------------------|--------|--------|-------------------|
| #                                | Pt-Ni  | Pt-Pt  | R-factor filtered |
| R [Å]                            | 2,612  | 2,695  | 9,06              |
| error                            | 0,014  | 0,012  |                   |
| s [Å]                            | 0,0757 | 0,0856 |                   |
| error (inacc                     | 0,018  | 0,011  |                   |
| N                                | 2,36   | 5,62   |                   |
| error                            | 1,1    | 2,4    |                   |
| 2s2                              | 0,0115 | 0,0147 |                   |
| error                            | 0,0054 | 0,0039 |                   |

| Ni1_Pt_L2,3_FLUO |        |        |                   |
|------------------|--------|--------|-------------------|
| #                | Pt-Ni  | Pt-Pt  | R-factor filtered |
| R [Å]            | 2,616  | 2,695  | 9,06              |
| error            | 0,015  | 0,01   |                   |
| s [Å]            | 0,0822 | 0,0855 |                   |
| error (inacc     | 0,018  | 0,01   |                   |
| N                | 2,46   | 6,11   |                   |
| error            | 1,2    | 2,4    |                   |
| 2s2              | 0,0135 | 0,0146 |                   |
| error            | 0,0059 | 0,0035 |                   |

| Ni3_Pt_L2,3_FLUO |        |        |                   |
|------------------|--------|--------|-------------------|
| #                | Pt-Ni  | Pt-Pt  | R-factor filtered |
| R [Å]            | 2,616  | 2,698  | 9,06              |
| error            | 0,015  | 0,0095 |                   |
| s [Å]            | 0,0852 | 0,0839 |                   |
| error (inacc     | 0,017  | 0,01   |                   |
| N                | 2,72   | 6,21   |                   |
| error            | 1,3    | 2,4    |                   |
| 2s2              | 0,0145 | 0,0141 |                   |
| error            | 0,0056 | 0,0034 |                   |

| Ni8_Pt_L2,3_FLUO |        |        |                   |
|------------------|--------|--------|-------------------|
| #                | Pt-Ni  | Pt-Pt  | R-factor filtered |
| R [Å]            | 2,614  | 2,696  | 9,06              |
| error            | 0,015  | 0,0099 |                   |
| s [Å]            | 0,0826 | 0,0841 |                   |
| error (inacc     | 0,017  | 0,01   |                   |
| N                | 2,56   | 6,12   |                   |
| error            | 1,2    | 2,4    |                   |
| 2s2              | 0,0136 | 0,0141 |                   |
| error            | 0,0056 | 0,0034 |                   |

| Ni24_Pt_L2,3_FLUO |       |        |                   |
|-------------------|-------|--------|-------------------|
| #                 | Pt-Ni | Pt-Pt  | R-factor filtered |
| R [Å]             | 2,616 | 2,702  | 9,06              |
| error             | 0,013 | 0,0088 |                   |

|                  |        |        |
|------------------|--------|--------|
| s [Å]            | 0,0801 | 0,0841 |
| error (inactive) | 0,016  | 0,0091 |
| N                | 2,71   | 6,89   |
| error            | 1,2    | 2,4    |
| 2s2              | 0,0128 | 0,0141 |
| error            | 0,0051 | 0,003  |

# Ni72\_Pt\_L2,3\_FLUO

| #                | Pt-Ni  | Pt-Pt  | R-factor filtered |
|------------------|--------|--------|-------------------|
| R [Å]            | 2,613  | 2,698  | 9,06              |
| error            | 0,013  | 0,0073 |                   |
| s [Å]            | 0,0908 | 0,0796 |                   |
| error (inactive) | 0,013  | 0,0089 |                   |
| N                | 3,6    | 6,75   |                   |
| error            | 1,4    | 2,3    |                   |
| 2s2              | 0,0165 | 0,0127 |                   |
| error            | 0,0047 | 0,0028 |                   |

| Ni0_Ni_K-edge    |        | Pt-Ni/KB |                   |
|------------------|--------|----------|-------------------|
| #                | Ni-Ni  | Ni-Pt    | R-factor filtered |
| R [Å]            | 2,572  | 2,63     | 4,974             |
| error            | 0,023  | 0,0081   |                   |
| s [Å]            | 0,124  | 0,0698   |                   |
| error (inactive) | 0,017  | 0,018    |                   |
| N                | 4,74   | 3,77     |                   |
| error            | 1,9    | 1,6      |                   |
| 2s2              | 0,0307 | 0,00975  |                   |
| error            | 0,0086 | 0,0049   |                   |

| Ni1_Ni_K-edge    |        |        |                   |
|------------------|--------|--------|-------------------|
| #                | Ni-Ni  | Ni-Pt  | R-factor filtered |
| R [Å]            | 2,59   | 2,631  | 4,974             |
| error            | 0,017  | 0,0087 |                   |
| s [Å]            | 0,11   | 0,0796 |                   |
| error (inactive) | 0,018  | 0,015  |                   |
| N                | 4,19   | 5,13   |                   |
| error            | 1,6    | 1,8    |                   |
| 2s2              | 0,0244 | 0,0127 |                   |
| error            | 0,008  | 0,0045 |                   |

| Ni3_Ni_K-edge    |        |        |                   |
|------------------|--------|--------|-------------------|
| #                | Ni-Ni  | Ni-Pt  | R-factor filtered |
| R [Å]            | 2,591  | 2,63   | 4,974             |
| error            | 0,017  | 0,0082 |                   |
| s [Å]            | 0,112  | 0,0774 |                   |
| error (inactive) | 0,018  | 0,014  |                   |
| N                | 4,46   | 5,07   |                   |
| error            | 1,7    | 1,7    |                   |
| 2s2              | 0,0252 | 0,012  |                   |
| error            | 0,0079 | 0,0044 |                   |

| Ni8_Ni_K-edge    |        |        |                   |
|------------------|--------|--------|-------------------|
| #                | Ni-Ni  | Ni-Pt  | R-factor filtered |
| R [Å]            | 2,585  | 2,632  | 4,974             |
| error            | 0,019  | 0,0073 |                   |
| s [Å]            | 0,12   | 0,0728 |                   |
| error (inactive) | 0,017  | 0,015  |                   |
| N                | 4,96   | 4,68   |                   |
| error            | 1,9    | 1,7    |                   |
| 2s2              | 0,029  | 0,0106 |                   |
| error            | 0,0081 | 0,0043 |                   |

| Ni24_Ni_K-edge |       |        |                   |
|----------------|-------|--------|-------------------|
| #              | Ni-Ni | Ni-Pt  | R-factor filtered |
| R [Å]          | 2,589 | 2,635  | 4,974             |
| error          | 0,018 | 0,0074 |                   |

|                  |        |        |
|------------------|--------|--------|
| s [Å]            | 0,118  | 0,0762 |
| error (inactive) | 0,017  | 0,014  |
| N                | 4,92   | 5,14   |
| error            | 1,8    | 1,7    |
| 2s2              | 0,0281 | 0,0116 |
| error            | 0,008  | 0,0042 |

#### Ni72\_Ni\_K-edge

| #                | Ni-Ni  | Ni-Pt  | R-factor filtered |
|------------------|--------|--------|-------------------|
| R [Å]            | 2,589  | 2,633  | 4,974             |
| error            | 0,017  | 0,007  |                   |
| s [Å]            | 0,118  | 0,0725 |                   |
| error (inactive) | 0,015  | 0,014  |                   |
| N                | 5,39   | 4,92   |                   |
| error            | 1,8    | 1,7    |                   |
| 2s2              | 0,028  | 0,0105 |                   |
| error            | 0,0072 | 0,0041 |                   |

| <b>Pt/C in situ</b>       | <b>Time (min)</b> |
|---------------------------|-------------------|
| Sample                    |                   |
| PtC_dry_Pt_L3             | 0                 |
| PtC_dry_100C_Pt_L3        | 0                 |
| PtC_h3po4_100C_Pt_L3      | 3                 |
| PtC_h3po4_100C_Pt_L3_0001 | 6                 |
| PtC_h3po4_100C_Pt_L3_0002 | 9                 |
| PtC_h3po4_100C_Pt_L3_0003 | 12                |
| PtC_h3po4_100C_Pt_L3_0004 | 15                |
| PtC_h3po4_100C_Pt_L3_0005 | 18                |
| PtC_h3po4_100C_Pt_L3_0006 | 21                |
| PtC_h3po4_100C_Pt_L3_0007 | 24                |
| PtC_h3po4_100C_Pt_L3_0008 | 27                |
| PtC_h3po4_100C_Pt_L3_0009 | 30                |
| PtC_h3po4_100C_Pt_L3_0010 | 33                |
| PtC_h3po4_100C_Pt_L3_0011 | 36                |
| PtC_h3po4_100C_Pt_L3_0012 | 39                |
| PtC_h3po4_100C_Pt_L3_0013 | 42                |
| PtC_h3po4_100C_Pt_L3_0014 | 45                |
| PtC_h3po4_100C_Pt_L3_0015 | 48                |
| PtC_h3po4_100C_Pt_L3_0016 | 51                |
| PtC_h3po4_100C_Pt_L3_0017 | 54                |
| PtC_h3po4_100C_Pt_L3_0018 | 57                |
| PtC_h3po4_100C_Pt_L3_0019 | 60                |
| PtC_h3po4_100C_Pt_L3_0020 | 63                |
| PtC_h3po4_100C_Pt_L3_0021 | 66                |
| PtC_h3po4_100C_Pt_L3_0022 | 69                |
| PtC_h3po4_100C_Pt_L3_0023 | 72                |
| PtC_h3po4_100C_Pt_L3_0024 | 75                |
| PtC_h3po4_100C_Pt_L3_0025 | 78                |
| PtC_h3po4_100C_Pt_L3_0026 | 81                |
| PtC_h3po4_100C_Pt_L3_0027 | 84                |
| PtC_h3po4_100C_Pt_L3_0028 | 87                |
| PtC_h3po4_100C_Pt_L3_0029 | 90                |
| PtC_h3po4_100C_Pt_L3_0030 | 93                |
| PtC_h3po4_100C_Pt_L3_0031 | 96                |
| PtC_h3po4_100C_Pt_L3_0032 | 99                |
| PtC_h3po4_100C_Pt_L3_0033 | 102               |
| PtC_h3po4_100C_Pt_L3_0034 | 105               |
| PtC_h3po4_100C_Pt_L3_0035 | 108               |
| PtC_h3po4_100C_Pt_L3_0036 | 111               |
| PtC_h3po4_100C_Pt_L3_0037 | 114               |
| PtC_h3po4_100C_Pt_L3_0038 | 117               |
| PtC_h3po4_100C_Pt_L3_0039 | 120               |
| PtC_h3po4_100C_Pt_L3_0040 | 123               |
| PtC_h3po4_100C_Pt_L3_0041 | 126               |
| PtC_h3po4_100C_Pt_L3_0042 | 129               |
| PtC_h3po4_100C_Pt_L3_0043 | 132               |

|                             |     |
|-----------------------------|-----|
| PtC_h3po4_100C_Pt_L3_0044   | 135 |
| PtC_h3po4_100C_Pt_L3_0045   | 138 |
| PtC_h3po4_100C_Pt_L3_0046   | 141 |
| PtC_h3po4_100C_Pt_L3_0047   | 144 |
| PtC_h3po4_100C_Pt_L3_0048   | 147 |
| PtC_h3po4_100C_Pt_L3_0049   | 150 |
| PtC_h3po4_100C_Pt_L3_0050   | 153 |
| PtC_h3po4_100C_Pt_L3_0051   | 156 |
| PtC_h3po4_100C_Pt_L3_0052   | 159 |
| PtC_h3po4_100C_Pt_L3_0053   | 162 |
| PtC_h3po4_100C_Pt_L3_0054   | 165 |
| PtC_h3po4_100C_Pt_L3_0055   | 168 |
| PtC_h3po4_100C_Pt_L3_0056   | 171 |
| PtC_h3po4_100C_Pt_L3_0057   | 174 |
| PtC_h3po4_100C_Pt_L3_0058   | 177 |
| PtC_h3po4_100C_Pt_L3_0059   | 180 |
| PtC_h3po4_100C_Pt_L3_0060   | 183 |
| PtC_h3po4_100C_Pt_L3_0061   | 186 |
| PtC_h3po4_100C_Pt_L3_0062   | 189 |
| PtC_h3po4_100C_Pt_L3_0063   | 192 |
| PtC_h3po4_100C_Pt_L3_0064   | 195 |
| PtC_h3po4_100C_Pt_L3_0065   | 198 |
| PtC_h3po4_100C_Pt_L3_0066   | 201 |
| PtC_h3po4_100C_Pt_L3_0067   | 204 |
| PtC_h3po4_100C_Pt_L3_0068   | 207 |
| PtC_h3po4_100C_Pt_L3_0069   | 210 |
| PtC_h3po4_100C_Pt_L3_0070   | 213 |
| PtC_h3po4_100C_Pt_L3_0071   | 216 |
| PtC_h3po4_100C_Pt_L3_0072   | 219 |
| PtC_h3po4_100C_Pt_L3_0073   | 222 |
| PtC_h3po4_100C_Pt_L3_0074   | 225 |
| PtC_h3po4_100C_Pt_L3_0075   | 228 |
| PtC_h3po4_100C_Pt_L3_0076   | 231 |
| PtC_h3po4_100C_Pt_L3_0077   | 234 |
| PtC_h3po4_100C_Pt_L3_0078   | 237 |
| PtC_h3po4_100C_Pt_L3_0079_1 | 240 |



PtC\_dry\_Pt\_L3

S02 = 0,92457225

| #                  | Pt-O   | Pt-Pt  | R-factor filtered |
|--------------------|--------|--------|-------------------|
| R [Å]              | 2,007  | 2,752  | 14,43             |
| error              | 0,024  | 0,0082 |                   |
| s [Å]              | 0,0894 | 0,0819 |                   |
| error (inaccurate) | 0,026  | 0,0087 |                   |
| N                  | 1,69   | 4,46   |                   |
| error              | 0,58   | 1,2    |                   |
| 2s2                | 0,016  | 0,013  |                   |
| error              | 0,009  | 0,003  |                   |

PtC\_dry\_100C\_Pt\_L3

| #                  | Pt-O   | Pt-Pt  | R-factor filtered |
|--------------------|--------|--------|-------------------|
| R [Å]              | 2,008  | 2,748  | 14,43             |
| error              | 0,027  | 0,0093 |                   |
| s [Å]              | 0,0958 | 0,0861 |                   |
| error (inaccurate) | 0,028  | 0,0093 |                   |
| N                  | 1,72   | 4,43   |                   |
| error              | 0,63   | 1,3    |                   |
| 2s2                | 0,0184 | 0,015  |                   |
| error              | 0,01   | 0,0032 |                   |

PtC\_h3po4\_100C\_Pt\_L3

| #                  | Pt-O   | Pt-Pt  | R-factor filtered |
|--------------------|--------|--------|-------------------|
| R [Å]              | 1,993  | 2,748  | 14,43             |
| error              | 0,041  | 0,008  |                   |
| s [Å]              | 0,116  | 0,0875 |                   |
| error (inaccurate) | 0,046  | 0,0076 |                   |
| N                  | 1,43   | 5,41   |                   |
| error              | 0,74   | 1,3    |                   |
| 2s2                | 0,0269 | 0,0153 |                   |
| error              | 0,02   | 0,0027 |                   |

PtC\_h3po4\_100C\_Pt\_L3\_0001

| #                  | Pt-O   | Pt-Pt    | R-factor filtered |
|--------------------|--------|----------|-------------------|
| R [Å]              | 1,998  | 2,75     | 14,43             |
| error              | 0,047  | 0,008    |                   |
| s [Å]              | 0,131  | 0,0866   |                   |
| error (inaccurate) | 0,051  | 0,0076   |                   |
| N                  | 1,58   | 5,43     |                   |
| error              | 0,85   | 1,3      |                   |
| 2s2                | 0,0341 | 1,50E-02 |                   |
| error              | 0,0250 | 0,0026   |                   |

PtC\_h3po4\_100C\_Pt\_L3\_0002

| #     | Pt-O  | Pt-Pt  | R-factor filtered |
|-------|-------|--------|-------------------|
| R [Å] | 2,004 | 2,749  | 14,43             |
| error | 0,05  | 0,0079 |                   |

|                    |        |        |
|--------------------|--------|--------|
| s [Å]              | 0,141  | 0,0868 |
| error (inaccurate) | 0,054  | 0,0076 |
| N                  | 1,73   | 5,43   |
| error              | 0,94   | 1,3    |
| 2s2                | 0,0396 | 0,0151 |
| error              | 0,028  | 0,0026 |

#### PtC\_h3po4\_100C\_Pt\_L3\_0003

| #                  | Pt-O   | Pt-Pt  | R-factor filtered |
|--------------------|--------|--------|-------------------|
| R [Å]              | 2,002  | 2,752  | 14,43             |
| error              | 0,047  | 0,0075 |                   |
| s [Å]              | 0,133  | 0,0834 |                   |
| error (inaccurate) | 0,05   | 0,0075 |                   |
| N                  | 1,65   | 5,18   |                   |
| error              | 0,87   | 1,2    |                   |
| 2s2                | 0,0354 | 0,0139 |                   |
| error              | 0,025  | 0,0025 |                   |

#### PtC\_h3po4\_100C\_Pt\_L3\_0004

| #                  | Pt-O   | Pt-Pt  | R-factor filtered |
|--------------------|--------|--------|-------------------|
| R [Å]              | 2,002  | 2,749  | 14,43             |
| error              | 0,045  | 0,0078 |                   |
| s [Å]              | 0,126  | 0,088  |                   |
| error (inaccurate) | 0,05   | 0,0073 |                   |
| N                  | 1,53   | 5,81   |                   |
| error              | 0,82   | 1,3    |                   |
| 2s2                | 0,0317 | 0,0155 |                   |
| error              | 0,023  | 0,0026 |                   |

#### PtC\_h3po4\_100C\_Pt\_L3\_0005

| #                  | Pt-O   | Pt-Pt  | R-factor filtered |
|--------------------|--------|--------|-------------------|
| R [Å]              | 2,001  | 2,75   | 14,43             |
| error              | 0,046  | 0,0081 |                   |
| s [Å]              | 0,129  | 0,0919 |                   |
| error (inaccurate) | 0,051  | 0,0074 |                   |
| N                  | 1,56   | 6,08   |                   |
| error              | 0,85   | 1,4    |                   |
| 2s2                | 0,0334 | 0,0169 |                   |
| error              | 0,024  | 0,0027 |                   |

#### PtC\_h3po4\_100C\_Pt\_L3\_0006

| #                  | Pt-O  | Pt-Pt  | R-factor filtered |
|--------------------|-------|--------|-------------------|
| R [Å]              | 1,988 | 2,746  | 14,43             |
| error              | 0,055 | 0,0077 |                   |
| s [Å]              | 0,151 | 0,0867 |                   |
| error (inaccurate) | 0,059 | 0,0073 |                   |
| N                  | 1,79  | 5,63   |                   |
| error              | 1     | 1,3    |                   |

|       |        |        |
|-------|--------|--------|
| 2s2   | 0,0456 | 0,015  |
| error | 0,033  | 0,0025 |

#### PtC\_h3po4\_100C\_Pt\_L3\_0007

| #                  | Pt-O   | Pt-Pt  | R-factor filtered |
|--------------------|--------|--------|-------------------|
| R [Å]              | 2,002  | 2,748  | 14,43             |
| error              | 0,046  | 0,008  |                   |
| s [Å]              | 0,128  | 0,0865 |                   |
| error (inaccurate) | 0,049  | 0,0077 |                   |
| N                  | 1,58   | 5,35   |                   |
| error              | 0,83   | 1,3    |                   |
| 2s2                | 0,0328 | 0,015  |                   |
| error              | 0,023  | 0,0027 |                   |

#### PtC\_h3po4\_100C\_Pt\_L3\_0008

| #                  | Pt-O   | Pt-Pt  | R-factor filtered |
|--------------------|--------|--------|-------------------|
| R [Å]              | 2      | 2,747  | 14,43             |
| error              | 0,052  | 0,0076 |                   |
| s [Å]              | 0,143  | 0,0844 |                   |
| error (inaccurate) | 0,056  | 0,0074 |                   |
| N                  | 1,73   | 5,26   |                   |
| error              | 0,96   | 1,2    |                   |
| 2s2                | 0,0409 | 0,0142 |                   |
| error              | 0,029  | 0,0025 |                   |

#### PtC\_h3po4\_100C\_Pt\_L3\_0009

| #                  | Pt-O   | Pt-Pt  | R-factor filtered |
|--------------------|--------|--------|-------------------|
| R [Å]              | 1,996  | 2,751  | 14,43             |
| error              | 0,049  | 0,0078 |                   |
| s [Å]              | 0,136  | 0,0885 |                   |
| error (inaccurate) | 0,054  | 0,0073 |                   |
| N                  | 1,6    | 5,73   |                   |
| error              | 0,89   | 1,3    |                   |
| 2s2                | 0,0368 | 0,0157 |                   |
| error              | 0,027  | 0,0026 |                   |

#### PtC\_h3po4\_100C\_Pt\_L3\_0010

| #                  | Pt-O   | Pt-Pt  | R-factor filtered |
|--------------------|--------|--------|-------------------|
| R [Å]              | 2,002  | 2,751  | 14,43             |
| error              | 0,053  | 0,0078 |                   |
| s [Å]              | 0,145  | 0,0867 |                   |
| error (inaccurate) | 0,057  | 0,0074 |                   |
| N                  | 1,73   | 5,56   |                   |
| error              | 0,97   | 1,3    |                   |
| 2s2                | 0,0423 | 0,015  |                   |
| error              | 0,031  | 0,0025 |                   |

#### PtC\_h3po4\_100C\_Pt\_L3\_0011

| #                  | Pt-O   | Pt-Pt  | R-factor filtered |
|--------------------|--------|--------|-------------------|
| R [Å]              | 2,004  | 2,75   | 14,77             |
| error              | 0,047  | 0,0075 |                   |
| s [Å]              | 0,129  | 0,0874 |                   |
| error (inaccurate) | 0,052  | 0,0072 |                   |
| N                  | 1,54   | 5,74   |                   |
| error              | 0,85   | 1,3    |                   |
| 2s2                | 0,0334 | 0,0153 |                   |
| error              | 0,025  | 0,0025 |                   |

#### PtC\_h3po4\_100C\_Pt\_L3\_0012

| #                  | Pt-O   | Pt-Pt  | R-factor filtered |
|--------------------|--------|--------|-------------------|
| R [Å]              | 1,997  | 2,746  | 14,77             |
| error              | 0,047  | 0,0053 |                   |
| s [Å]              | 0,148  | 0,0869 |                   |
| error (inaccurate) | 0,058  | 0,0074 |                   |
| N                  | 1,77   | 5,67   |                   |
| error              | 1      | 1,3    |                   |
| 2s2                | 0,0439 | 0,0151 |                   |
| error              | 0,032  | 0,0026 |                   |

#### PtC\_h3po4\_100C\_Pt\_L3\_0013

| #                  | Pt-O  | Pt-Pt  | R-factor filtered |
|--------------------|-------|--------|-------------------|
| R [Å]              | 2     | 2,753  | 14,77             |
| error              | 0,05  | 0,0077 |                   |
| s [Å]              | 0,141 | 0,0871 |                   |
| error (inaccurate) | 0,054 | 0,0073 |                   |
| N                  | 1,71  | 5,68   |                   |
| error              | 0,93  | 1,3    |                   |
| 2s2                | 0,04  | 0,0152 |                   |
| error              | 0,028 | 0,0025 |                   |

#### PtC\_h3po4\_100C\_Pt\_L3\_0014

| #                  | Pt-O   | Pt-Pt  | R-factor filtered |
|--------------------|--------|--------|-------------------|
| R [Å]              | 2,005  | 2,75   | 14,77             |
| error              | 0,044  | 0,0079 |                   |
| s [Å]              | 0,121  | 0,0877 |                   |
| error (inaccurate) | 0,049  | 0,0074 |                   |
| N                  | 1,46   | 5,65   |                   |
| error              | 0,78   | 1,3    |                   |
| 2s2                | 0,0295 | 0,0154 |                   |
| error              | 0,022  | 0,0026 |                   |

#### PtC\_h3po4\_100C\_Pt\_L3\_0015

| #     | Pt-O  | Pt-Pt  | R-factor filtered |
|-------|-------|--------|-------------------|
| R [Å] | 2,004 | 2,747  | 14,77             |
| error | 0,048 | 0,0072 |                   |
| s [Å] | 0,137 | 0,0813 |                   |

|                    |        |        |
|--------------------|--------|--------|
| error (inaccurate) | 0,052  | 0,0075 |
| N                  | 1,69   | 4,98   |
| error              | 0,91   | 1,1    |
| 2s2                | 0,0374 | 0,0132 |
| error              | 0,026  | 0,0024 |

#### PtC\_h3po4\_100C\_Pt\_L3\_0016

| #                  | Pt-O   | Pt-Pt  | R-factor filtered |
|--------------------|--------|--------|-------------------|
| R [Å]              | 1,993  | 2,749  | 14,77             |
| error              | 0,05   | 0,008  |                   |
| s [Å]              | 0,14   | 0,0898 |                   |
| error (inaccurate) | 0,055  | 0,0074 |                   |
| N                  | 1,67   | 5,93   |                   |
| error              | 0,92   | 1,3    |                   |
| 2s2                | 0,0391 | 0,0161 |                   |
| error              | 0,028  | 0,0026 |                   |

#### PtC\_h3po4\_100C\_Pt\_L3\_0017

| #                  | Pt-O   | Pt-Pt  | R-factor filtered |
|--------------------|--------|--------|-------------------|
| R [Å]              | 2,008  | 2,752  | 14,77             |
| error              | 0,048  | 0,008  |                   |
| s [Å]              | 0,131  | 0,0895 |                   |
| error (inaccurate) | 0,053  | 0,0074 |                   |
| N                  | 1,56   | 5,81   |                   |
| error              | 0,85   | 1,3    |                   |
| 2s2                | 0,0344 | 0,016  |                   |
| error              | 0,025  | 0,0027 |                   |

#### PtC\_h3po4\_100C\_Pt\_L3\_0018

| #                  | Pt-O   | Pt-Pt  | R-factor filtered |
|--------------------|--------|--------|-------------------|
| R [Å]              | 1,991  | 2,747  | 14,77             |
| error              | 0,051  | 0,0076 |                   |
| s [Å]              | 0,142  | 0,0873 |                   |
| error (inaccurate) | 0,056  | 0,0073 |                   |
| N                  | 1,7    | 5,64   |                   |
| error              | 0,95   | 1,3    |                   |
| 2s2                | 0,0406 | 0,0152 |                   |
| error              | 0,029  | 0,0025 |                   |

#### PtC\_h3po4\_100C\_Pt\_L3\_0019

| #                  | Pt-O   | Pt-Pt  | R-factor filtered |
|--------------------|--------|--------|-------------------|
| R [Å]              | 1,994  | 2,751  | 14,77             |
| error              | 0,048  | 0,0075 |                   |
| s [Å]              | 0,136  | 0,0884 |                   |
| error (inaccurate) | 0,054  | 0,0073 |                   |
| N                  | 1,6    | 5,82   |                   |
| error              | 0,89   | 1,3    |                   |
| 2s2                | 0,0369 | 0,0156 |                   |

|       |       |        |
|-------|-------|--------|
| error | 0,027 | 0,0026 |
|-------|-------|--------|

PtC\_h3po4\_100C\_Pt\_L3\_0020

| #                  | Pt-O   | Pt-Pt  | R-factor filtered |
|--------------------|--------|--------|-------------------|
| R [Å]              | 1,995  | 2,747  | 14,77             |
| error              | 0,047  | 0,0078 |                   |
| s [Å]              | 0,131  | 0,0887 |                   |
| error (inaccurate) | 0,052  | 0,0074 |                   |
| N                  | 1,57   | 5,73   |                   |
| error              | 0,86   | 1,3    |                   |
| 2s2                | 0,0343 | 0,0157 |                   |
| error              | 0,025  | 0,0026 |                   |

PtC\_h3po4\_100C\_Pt\_L3\_0021

| #                  | Pt-O   | Pt-Pt  | R-factor filtered |
|--------------------|--------|--------|-------------------|
| R [Å]              | 2,001  | 2,746  | 14,85             |
| error              | 0,049  | 0,0075 |                   |
| s [Å]              | 0,135  | 0,089  |                   |
| error (inaccurate) | 0,055  | 0,007  |                   |
| N                  | 1,59   | 6,06   |                   |
| error              | 0,89   | 1,3    |                   |
| 2s2                | 0,0365 | 0,0158 |                   |
| error              | 0,027  | 0,0025 |                   |

PtC\_h3po4\_100C\_Pt\_L3\_0022

| #                  | Pt-O   | Pt-Pt  | R-factor filtered |
|--------------------|--------|--------|-------------------|
| R [Å]              | 2,002  | 2,752  | 14,85             |
| error              | 0,051  | 0,0076 |                   |
| s [Å]              | 0,143  | 0,089  |                   |
| error (inaccurate) | 0,056  | 0,0072 |                   |
| N                  | 1,68   | 6      |                   |
| error              | 0,94   | 1,3    |                   |
| 2s2                | 0,0407 | 0,0159 |                   |
| error              | 0,03   | 0,0026 |                   |

PtC\_h3po4\_100C\_Pt\_L3\_0023

| #                  | Pt-O   | Pt-Pt  | R-factor filtered |
|--------------------|--------|--------|-------------------|
| R [Å]              | 1,998  | 2,752  | 14,85             |
| error              | 0,05   | 0,0075 |                   |
| s [Å]              | 0,142  | 0,0898 |                   |
| error (inaccurate) | 0,056  | 0,0073 |                   |
| N                  | 1,68   | 5,89   |                   |
| error              | 0,94   | 1,3    |                   |
| 2s2                | 0,0404 | 0,0161 |                   |
| error              | 0,029  | 0,0026 |                   |

PtC\_h3po4\_100C\_Pt\_L3\_0024

| # | Pt-O | Pt-Pt | R-factor filtered |
|---|------|-------|-------------------|
|---|------|-------|-------------------|

|                    |        |        |       |
|--------------------|--------|--------|-------|
| R [Å]              | 2,004  | 2,753  | 14,85 |
| error              | 0,047  | 0,007  |       |
| s [Å]              | 0,135  | 0,0852 |       |
| error (inaccurate) | 0,053  | 0,0071 |       |
| N                  | 1,64   | 5,55   |       |
| error              | 0,89   | 1,2    |       |
| 2s2                | 0,0367 | 0,0145 |       |
| error              | 0,026  | 0,0024 |       |

#### PtC\_h3po4\_100C\_Pt\_L3\_0025

| #                  | Pt-O   | Pt-Pt  | R-factor filtered |
|--------------------|--------|--------|-------------------|
| R [Å]              | 2,001  | 2,752  | 14,85             |
| error              | 0,052  | 0,0072 |                   |
| s [Å]              | 0,146  | 0,0881 |                   |
| error (inaccurate) | 0,058  | 0,0071 |                   |
| N                  | 1,71   | 5,91   |                   |
| error              | 0,98   | 1,3    |                   |
| 2s2                | 0,0429 | 0,0155 |                   |
| error              | 0,031  | 0,0025 |                   |

#### PtC\_h3po4\_100C\_Pt\_L3\_0026

| #                  | Pt-O   | Pt-Pt  | R-factor filtered |
|--------------------|--------|--------|-------------------|
| R [Å]              | 2,007  | 2,755  | 14,85             |
| error              | 0,045  | 0,0071 |                   |
| s [Å]              | 0,129  | 0,084  |                   |
| error (inaccurate) | 0,05   | 0,0074 |                   |
| N                  | 1,58   | 5,24   |                   |
| error              | 0,84   | 1,2    |                   |
| 2s2                | 0,0335 | 0,0141 |                   |
| error              | 0,024  | 0,0025 |                   |

#### PtC\_h3po4\_100C\_Pt\_L3\_0027

| #                  | Pt-O   | Pt-Pt  | R-factor filtered |
|--------------------|--------|--------|-------------------|
| R [Å]              | 1,994  | 2,747  | 14,85             |
| error              | 0,039  | 0,0083 |                   |
| s [Å]              | 0,106  | 0,0901 |                   |
| error (inaccurate) | 0,047  | 0,0074 |                   |
| N                  | 1,25   | 5,99   |                   |
| error              | 0,67   | 1,4    |                   |
| 2s2                | 0,0226 | 0,0163 |                   |
| error              | 0,018  | 0,0027 |                   |

#### PtC\_h3po4\_100C\_Pt\_L3\_0028

| #                  | Pt-O  | Pt-Pt  | R-factor filtered |
|--------------------|-------|--------|-------------------|
| R [Å]              | 2,001 | 2,753  | 14,85             |
| error              | 0,047 | 0,0057 |                   |
| s [Å]              | 0,146 | 0,0904 |                   |
| error (inaccurate) | 0,057 | 0,0073 |                   |

|       |        |        |
|-------|--------|--------|
| N     | 1,73   | 6,02   |
| error | 0,97   | 1,4    |
| 2s2   | 0,0425 | 0,0163 |
| error | 0,031  | 0,0026 |

#### PtC\_h3po4\_100C\_Pt\_L3\_0029

| #                  | Pt-O   | Pt-Pt  | R-factor filtered |
|--------------------|--------|--------|-------------------|
| R [Å]              | 2,001  | 2,753  | 14,85             |
| error              | 0,054  | 0,0083 |                   |
| s [Å]              | 0,149  | 0,0954 |                   |
| error (inaccurate) | 0,06   | 0,0075 |                   |
| N                  | 1,74   | 6,55   |                   |
| error              | 0,99   | 1,5    |                   |
| 2s2                | 0,0443 | 0,0182 |                   |
| error              | 0,033  | 0,0028 |                   |

#### PtC\_h3po4\_100C\_Pt\_L3\_0030

| #                  | Pt-O   | Pt-Pt  | R-factor filtered |
|--------------------|--------|--------|-------------------|
| R [Å]              | 2,002  | 2,751  | 14,85             |
| error              | 0,045  | 0,0078 |                   |
| s [Å]              | 0,123  | 0,0894 |                   |
| error (inaccurate) | 0,05   | 0,0072 |                   |
| N                  | 1,45   | 6,01   |                   |
| error              | 0,79   | 1,3    |                   |
| 2s2                | 0,0302 | 0,016  |                   |
| error              | 0,023  | 0,0026 |                   |

#### PtC\_h3po4\_100C\_Pt\_L3\_0031

| #                  | Pt-O   | Pt-Pt  | R-factor filtered |
|--------------------|--------|--------|-------------------|
| R [Å]              | 1,998  | 2,752  | 15,53             |
| error              | 0,054  | 0,0076 |                   |
| s [Å]              | 0,146  | 0,0877 |                   |
| error (inaccurate) | 0,058  | 0,0073 |                   |
| N                  | 1,7    | 5,76   |                   |
| error              | 0,97   | 1,3    |                   |
| 2s2                | 0,0428 | 0,0154 |                   |
| error              | 0,031  | 0,0025 |                   |

#### PtC\_h3po4\_100C\_Pt\_L3\_0032

| #                  | Pt-O  | Pt-Pt  | R-factor filtered |
|--------------------|-------|--------|-------------------|
| R [Å]              | 1,997 | 2,752  | 15,53             |
| error              | 0,047 | 0,0067 |                   |
| s [Å]              | 0,138 | 0,0816 |                   |
| error (inaccurate) | 0,052 | 0,0074 |                   |
| N                  | 1,68  | 5,1    |                   |
| error              | 0,9   | 1,1    |                   |
| 2s2                | 0,038 | 0,0133 |                   |
| error              | 0,027 | 0,0024 |                   |



## PtC\_h3po4\_100C\_Pt\_L3\_0033

| #                  | Pt-O   | Pt-Pt  | R-factor filtered |
|--------------------|--------|--------|-------------------|
| R [Å]              | 1,988  | 2,75   | 15,53             |
| error              | 0,048  | 0,0076 |                   |
| s [Å]              | 0,134  | 0,0903 |                   |
| error (inaccurate) | 0,055  | 0,0071 |                   |
| N                  | 1,53   | 6,2    |                   |
| error              | 0,87   | 1,4    |                   |
| 2s2                | 0,0357 | 0,0163 |                   |
| error              | 0,027  | 0,0025 |                   |

## PtC\_h3po4\_100C\_Pt\_L3\_0034

| #                  | Pt-O   | Pt-Pt  | R-factor filtered |
|--------------------|--------|--------|-------------------|
| R [Å]              | 2,005  | 2,75   | 15,53             |
| error              | 0,048  | 0,0078 |                   |
| s [Å]              | 0,132  | 0,0892 |                   |
| error (inaccurate) | 0,053  | 0,0073 |                   |
| N                  | 1,57   | 5,88   |                   |
| error              | 0,86   | 1,3    |                   |
| 2s2                | 0,0348 | 0,0159 |                   |
| error              | 0,026  | 0,0026 |                   |

## PtC\_h3po4\_100C\_Pt\_L3\_0035

| #                  | Pt-O   | Pt-Pt  | R-factor filtered |
|--------------------|--------|--------|-------------------|
| R [Å]              | 2,003  | 2,752  | 15,53             |
| error              | 0,051  | 0,0075 |                   |
| s [Å]              | 0,142  | 0,0875 |                   |
| error (inaccurate) | 0,056  | 0,0073 |                   |
| N                  | 1,68   | 5,72   |                   |
| error              | 0,93   | 1,3    |                   |
| 2s2                | 0,0402 | 0,0153 |                   |
| error              | 0,029  | 0,0026 |                   |

## PtC\_h3po4\_100C\_Pt\_L3\_0036

| #                  | Pt-O   | Pt-Pt  | R-factor filtered |
|--------------------|--------|--------|-------------------|
| R [Å]              | 2,003  | 2,753  | 15,53             |
| error              | 0,05   | 0,0079 |                   |
| s [Å]              | 0,138  | 0,0901 |                   |
| error (inaccurate) | 0,056  | 0,0075 |                   |
| N                  | 1,61   | 5,86   |                   |
| error              | 0,9    | 1,4    |                   |
| 2s2                | 0,0383 | 0,0162 |                   |
| error              | 0,028  | 0,0027 |                   |

## PtC\_h3po4\_100C\_Pt\_L3\_0037

| #     | Pt-O | Pt-Pt | R-factor filtered |
|-------|------|-------|-------------------|
| R [Å] | 1,99 | 2,745 | 15,53             |

|                    |        |        |
|--------------------|--------|--------|
| error              | 0,044  | 0,0079 |
| s [Å]              | 0,121  | 0,0873 |
| error (inaccurate) | 0,05   | 0,0073 |
| N                  | 1,43   | 5,68   |
| error              | 0,78   | 1,3    |
| 2s2                | 0,0294 | 0,0153 |
| error              | 0,022  | 0,0025 |

#### PtC\_h3po4\_100C\_Pt\_L3\_0038

| #                  | Pt-O   | Pt-Pt  | R-factor filtered |
|--------------------|--------|--------|-------------------|
| R [Å]              | 1,985  | 2,747  | 15,53             |
| error              | 0,051  | 0,0076 |                   |
| s [Å]              | 0,141  | 0,0853 |                   |
| error (inaccurate) | 0,056  | 0,0073 |                   |
| N                  | 1,64   | 5,55   |                   |
| error              | 0,92   | 1,2    |                   |
| 2s2                | 0,0396 | 0,0146 |                   |
| error              | 0,029  | 0,0025 |                   |

#### PtC\_h3po4\_100C\_Pt\_L3\_0039

| #                  | Pt-O   | Pt-Pt  | R-factor filtered |
|--------------------|--------|--------|-------------------|
| R [Å]              | 2,001  | 2,754  | 15,53             |
| error              | 0,052  | 0,0073 |                   |
| s [Å]              | 0,145  | 0,089  |                   |
| error (inaccurate) | 0,057  | 0,0071 |                   |
| N                  | 1,71   | 6,1    |                   |
| error              | 0,96   | 1,3    |                   |
| 2s2                | 0,0422 | 0,0159 |                   |
| error              | 0,03   | 0,0025 |                   |

#### PtC\_h3po4\_100C\_Pt\_L3\_0040

| #                  | Pt-O   | Pt-Pt  | R-factor filtered |
|--------------------|--------|--------|-------------------|
| R [Å]              | 1,988  | 2,747  | 15,53             |
| error              | 0,04   | 0,0082 |                   |
| s [Å]              | 0,107  | 0,0913 |                   |
| error (inaccurate) | 0,049  | 0,0073 |                   |
| N                  | 1,21   | 6,16   |                   |
| error              | 0,67   | 1,4    |                   |
| 2s2                | 0,0228 | 0,0167 |                   |
| error              | 0,018  | 0,0027 |                   |

#### PtC\_h3po4\_100C\_Pt\_L3\_0041

| #                  | Pt-O  | Pt-Pt  | R-factor filtered |
|--------------------|-------|--------|-------------------|
| R [Å]              | 1,997 | 2,748  | 15,6              |
| error              | 0,053 | 0,0079 |                   |
| s [Å]              | 0,144 | 0,0892 |                   |
| error (inaccurate) | 0,057 | 0,0073 |                   |
| N                  | 1,69  | 5,9    |                   |

|       |        |        |
|-------|--------|--------|
| error | 0,96   | 1,3    |
| 2s2   | 0,0417 | 0,0159 |
| error | 0,03   | 0,0026 |

#### PtC\_h3po4\_100C\_Pt\_L3\_0042

| #                  | Pt-O   | Pt-Pt  | R-factor filtered |
|--------------------|--------|--------|-------------------|
| R [Å]              | 1,994  | 2,749  | 15,6              |
| error              | 0,043  | 0,0068 |                   |
| s [Å]              | 0,123  | 0,0814 |                   |
| error (inaccurate) | 0,049  | 0,0071 |                   |
| N                  | 1,49   | 5,28   |                   |
| error              | 0,79   | 1,1    |                   |
| 2s2                | 0,0304 | 0,0133 |                   |
| error              | 0,022  | 0,0023 |                   |

#### PtC\_h3po4\_100C\_Pt\_L3\_0043

| #                  | Pt-O   | Pt-Pt  | R-factor filtered |
|--------------------|--------|--------|-------------------|
| R [Å]              | 2,007  | 2,753  | 15,6              |
| error              | 0,049  | 0,0077 |                   |
| s [Å]              | 0,131  | 0,0901 |                   |
| error (inaccurate) | 0,055  | 0,0073 |                   |
| N                  | 1,5    | 6,02   |                   |
| error              | 0,85   | 1,3    |                   |
| 2s2                | 0,0344 | 0,0162 |                   |
| error              | 0,026  | 0,0026 |                   |

#### PtC\_h3po4\_100C\_Pt\_L3\_0044

| #                  | Pt-O   | Pt-Pt  | R-factor filtered |
|--------------------|--------|--------|-------------------|
| R [Å]              | 1,998  | 2,75   | 15,6              |
| error              | 0,051  | 0,0075 |                   |
| s [Å]              | 0,145  | 0,0899 |                   |
| error (inaccurate) | 0,057  | 0,0073 |                   |
| N                  | 1,7    | 5,95   |                   |
| error              | 0,96   | 1,3    |                   |
| 2s2                | 0,0419 | 0,0162 |                   |
| error              | 0,03   | 0,0026 |                   |

#### PtC\_h3po4\_100C\_Pt\_L3\_0045

| #                  | Pt-O   | Pt-Pt  | R-factor filtered |
|--------------------|--------|--------|-------------------|
| R [Å]              | 1,997  | 2,751  | 15,6              |
| error              | 0,051  | 0,0078 |                   |
| s [Å]              | 0,141  | 0,0885 |                   |
| error (inaccurate) | 0,056  | 0,0073 |                   |
| N                  | 1,64   | 5,77   |                   |
| error              | 0,92   | 1,3    |                   |
| 2s2                | 0,0398 | 0,0157 |                   |
| error              | 0,029  | 0,0026 |                   |

## PtC\_h3po4\_100C\_Pt\_L3\_0046

| #                  | Pt-O   | Pt-Pt  | R-factor filtered |
|--------------------|--------|--------|-------------------|
| R [Å]              | 1,987  | 2,751  | 15,6              |
| error              | 0,042  | 0,0076 |                   |
| s [Å]              | 0,117  | 0,084  |                   |
| error (inaccurate) | 0,048  | 0,0074 |                   |
| N                  | 1,38   | 5,29   |                   |
| error              | 0,73   | 1,2    |                   |
| 2s2                | 0,0274 | 0,0141 |                   |
| error              | 0,021  | 0,0025 |                   |

## PtC\_h3po4\_100C\_Pt\_L3\_0047

| #                  | Pt-O   | Pt-Pt  | R-factor filtered |
|--------------------|--------|--------|-------------------|
| R [Å]              | 1,989  | 2,749  | 15,6              |
| error              | 0,052  | 0,0075 |                   |
| s [Å]              | 0,143  | 0,0905 |                   |
| error (inaccurate) | 0,058  | 0,007  |                   |
| N                  | 1,62   | 6,26   |                   |
| error              | 0,94   | 1,4    |                   |
| 2s2                | 0,0406 | 0,0164 |                   |
| error              | 0,03   | 0,0025 |                   |

## PtC\_h3po4\_100C\_Pt\_L3\_0048

| #                  | Pt-O   | Pt-Pt  | R-factor filtered |
|--------------------|--------|--------|-------------------|
| R [Å]              | 2,003  | 2,752  | 15,6              |
| error              | 0,048  | 0,0071 |                   |
| s [Å]              | 0,137  | 0,0897 |                   |
| error (inaccurate) | 0,055  | 0,0071 |                   |
| N                  | 1,6    | 6,07   |                   |
| error              | 0,89   | 1,3    |                   |
| 2s2                | 0,0373 | 0,0161 |                   |
| error              | 0,027  | 0,0025 |                   |

## PtC\_h3po4\_100C\_Pt\_L3\_0049

| #                  | Pt-O   | Pt-Pt  | R-factor filtered |
|--------------------|--------|--------|-------------------|
| R [Å]              | 1,99   | 2,75   | 15,6              |
| error              | 0,04   | 0,0073 |                   |
| s [Å]              | 0,114  | 0,0859 |                   |
| error (inaccurate) | 0,047  | 0,0072 |                   |
| N                  | 1,35   | 5,61   |                   |
| error              | 0,71   | 1,2    |                   |
| 2s2                | 0,0259 | 0,0148 |                   |
| error              | 0,02   | 0,0025 |                   |

## PtC\_h3po4\_100C\_Pt\_L3\_0050

| #     | Pt-O  | Pt-Pt  | R-factor filtered |
|-------|-------|--------|-------------------|
| R [Å] | 1,989 | 2,75   | 15,6              |
| error | 0,038 | 0,0073 |                   |

|                    |       |        |
|--------------------|-------|--------|
| s [Å]              | 0,105 | 0,0882 |
| error (inaccurate) | 0,046 | 0,007  |
| N                  | 1,24  | 6      |
| error              | 0,65  | 1,3    |
| 2s2                | 0,022 | 0,0156 |
| error              | 0,017 | 0,0025 |

#### PtC\_h3po4\_100C\_Pt\_L3\_0051

| #                  | Pt-O   | Pt-Pt  | R-factor filtered |
|--------------------|--------|--------|-------------------|
| R [Å]              | 2,01   | 2,752  | 17,78             |
| error              | 0,054  | 0,0073 |                   |
| s [Å]              | 0,148  | 0,0877 |                   |
| error (inaccurate) | 0,059  | 0,0073 |                   |
| N                  | 1,74   | 5,74   |                   |
| error              | 0,98   | 1,3    |                   |
| 2s2                | 0,0441 | 0,0154 |                   |
| error              | 0,032  | 0,0026 |                   |

#### PtC\_h3po4\_100C\_Pt\_L3\_0052

| #                  | Pt-O  | Pt-Pt  | R-factor filtered |
|--------------------|-------|--------|-------------------|
| R [Å]              | 2     | 2,751  | 17,78             |
| error              | 0,042 | 0,0072 |                   |
| s [Å]              | 0,12  | 0,0862 |                   |
| error (inaccurate) | 0,048 | 0,0073 |                   |
| N                  | 1,45  | 5,53   |                   |
| error              | 0,76  | 1,2    |                   |
| 2s2                | 0,029 | 0,0149 |                   |
| error              | 0,021 | 0,0025 |                   |

#### PtC\_h3po4\_100C\_Pt\_L3\_0053

| #                  | Pt-O   | Pt-Pt  | R-factor filtered |
|--------------------|--------|--------|-------------------|
| R [Å]              | 1,997  | 2,749  | 17,78             |
| error              | 0,04   | 0,0075 |                   |
| s [Å]              | 0,111  | 0,0886 |                   |
| error (inaccurate) | 0,046  | 0,0072 |                   |
| N                  | 1,33   | 5,88   |                   |
| error              | 0,7    | 1,3    |                   |
| 2s2                | 0,0248 | 0,0157 |                   |
| error              | 0,019  | 0,0025 |                   |

#### PtC\_h3po4\_100C\_Pt\_L3\_0054

| #                  | Pt-O  | Pt-Pt  | R-factor filtered |
|--------------------|-------|--------|-------------------|
| R [Å]              | 1,988 | 2,75   | 17,78             |
| error              | 0,044 | 0,0073 |                   |
| s [Å]              | 0,124 | 0,0891 |                   |
| error (inaccurate) | 0,051 | 0,0072 |                   |
| N                  | 1,43  | 5,97   |                   |
| error              | 0,78  | 1,3    |                   |

|       |        |        |
|-------|--------|--------|
| 2s2   | 0,0307 | 0,0159 |
| error | 0,023  | 0,0025 |

#### PtC\_h3po4\_100C\_Pt\_L3\_0055

| #                  | Pt-O   | Pt-Pt  | R-factor filtered |
|--------------------|--------|--------|-------------------|
| R [Å]              | 1,993  | 2,747  | 17,78             |
| error              | 0,047  | 0,0073 |                   |
| s [Å]              | 0,133  | 0,0851 |                   |
| error (inaccurate) | 0,052  | 0,0073 |                   |
| N                  | 1,58   | 5,46   |                   |
| error              | 0,86   | 1,2    |                   |
| 2s2                | 0,0352 | 0,0145 |                   |
| error              | 0,026  | 0,0025 |                   |

#### PtC\_h3po4\_100C\_Pt\_L3\_0056

| #                  | Pt-O   | Pt-Pt  | R-factor filtered |
|--------------------|--------|--------|-------------------|
| R [Å]              | 1,992  | 2,754  | 17,78             |
| error              | 0,046  | 0,0073 |                   |
| s [Å]              | 0,131  | 0,0883 |                   |
| error (inaccurate) | 0,052  | 0,0073 |                   |
| N                  | 1,54   | 5,75   |                   |
| error              | 0,83   | 1,3    |                   |
| 2s2                | 0,0343 | 0,0156 |                   |
| error              | 0,025  | 0,0026 |                   |

#### PtC\_h3po4\_100C\_Pt\_L3\_0057

| #                  | Pt-O  | Pt-Pt  | R-factor filtered |
|--------------------|-------|--------|-------------------|
| R [Å]              | 2,007 | 2,752  | 17,78             |
| error              | 0,05  | 0,0075 |                   |
| s [Å]              | 0,138 | 0,088  |                   |
| error (inaccurate) | 0,056 | 0,0074 |                   |
| N                  | 1,61  | 5,72   |                   |
| error              | 0,9   | 1,3    |                   |
| 2s2                | 0,038 | 0,0155 |                   |
| error              | 0,028 | 0,0026 |                   |

#### PtC\_h3po4\_100C\_Pt\_L3\_0058

| #                  | Pt-O   | Pt-Pt  | R-factor filtered |
|--------------------|--------|--------|-------------------|
| R [Å]              | 1,996  | 2,753  | 17,78             |
| error              | 0,047  | 0,0073 |                   |
| s [Å]              | 0,134  | 0,0877 |                   |
| error (inaccurate) | 0,053  | 0,0074 |                   |
| N                  | 1,58   | 5,64   |                   |
| error              | 0,86   | 1,3    |                   |
| 2s2                | 0,0361 | 0,0154 |                   |
| error              | 0,026  | 0,0026 |                   |

#### PtC\_h3po4\_100C\_Pt\_L3\_0059

| #                  | Pt-O   | Pt-Pt  | R-factor filtered |
|--------------------|--------|--------|-------------------|
| R [Å]              | 1,989  | 2,751  | 17,78             |
| error              | 0,042  | 0,0077 |                   |
| s [Å]              | 0,117  | 0,0876 |                   |
| error (inaccurate) | 0,049  | 0,0074 |                   |
| N                  | 1,36   | 5,72   |                   |
| error              | 0,73   | 1,3    |                   |
| 2s2                | 0,0274 | 0,0154 |                   |
| error              | 0,021  | 0,0026 |                   |

#### PtC\_h3po4\_100C\_Pt\_L3\_0060

| #                  | Pt-O   | Pt-Pt  | R-factor filtered |
|--------------------|--------|--------|-------------------|
| R [Å]              | 2,002  | 2,748  | 17,78             |
| error              | 0,054  | 0,0077 |                   |
| s [Å]              | 0,149  | 0,0901 |                   |
| error (inaccurate) | 0,059  | 0,0073 |                   |
| N                  | 1,74   | 6,02   |                   |
| error              | 0,99   | 1,3    |                   |
| 2s2                | 0,0445 | 0,0163 |                   |
| error              | 0,032  | 0,0026 |                   |

#### PtC\_h3po4\_100C\_Pt\_L3\_0061

| #                  | Pt-O   | Pt-Pt  | R-factor filtered |
|--------------------|--------|--------|-------------------|
| R [Å]              | 2,002  | 2,756  | 17,03             |
| error              | 0,053  | 0,0074 |                   |
| s [Å]              | 0,151  | 0,0882 |                   |
| error (inaccurate) | 0,058  | 0,0074 |                   |
| N                  | 1,81   | 5,73   |                   |
| error              | 0,99   | 1,3    |                   |
| 2s2                | 0,0459 | 0,0156 |                   |
| error              | 0,032  | 0,0026 |                   |

#### PtC\_h3po4\_100C\_Pt\_L3\_0062

| #                  | Pt-O     | Pt-Pt  | R-factor filtered |
|--------------------|----------|--------|-------------------|
| R [Å]              | 1,996    | 2,752  | 17,03             |
| error              | 0,038    | 0,0071 |                   |
| s [Å]              | 0,11     | 0,0861 |                   |
| error (inaccurate) | 0,046    | 0,0072 |                   |
| N                  | 1,33     | 5,61   |                   |
| error              | 0,69     | 1,2    |                   |
| 2s2                | 2,43E-02 | 0,0148 |                   |
| error              | 0,018    | 0,0025 |                   |

#### PtC\_h3po4\_100C\_Pt\_L3\_0063

| #     | Pt-O  | Pt-Pt  | R-factor filtered |
|-------|-------|--------|-------------------|
| R [Å] | 1,995 | 2,748  | 17,03             |
| error | 0,04  | 0,0078 |                   |
| s [Å] | 0,11  | 0,0881 |                   |

|                    |        |        |
|--------------------|--------|--------|
| error (inaccurate) | 0,046  | 0,0074 |
| N                  | 1,32   | 5,63   |
| error              | 0,69   | 1,3    |
| 2s2                | 0,0244 | 0,0155 |
| error              | 0,018  | 0,0026 |

#### PtC\_h3po4\_100C\_Pt\_L3\_0064

| #                  | Pt-O   | Pt-Pt  | R-factor filtered |
|--------------------|--------|--------|-------------------|
| R [Å]              | 2,004  | 2,755  | 17,03             |
| error              | 0,046  | 0,0071 |                   |
| s [Å]              | 0,131  | 0,0843 |                   |
| error (inaccurate) | 0,052  | 0,0071 |                   |
| N                  | 1,56   | 5,51   |                   |
| error              | 0,83   | 1,2    |                   |
| 2s2                | 0,0343 | 0,0142 |                   |
| error              | 0,025  | 0,0024 |                   |

#### PtC\_h3po4\_100C\_Pt\_L3\_0065

| #                  | Pt-O   | Pt-Pt  | R-factor filtered |
|--------------------|--------|--------|-------------------|
| R [Å]              | 2,018  | 2,755  | 17,03             |
| error              | 0,046  | 0,0071 |                   |
| s [Å]              | 0,128  | 0,0875 |                   |
| error (inaccurate) | 0,052  | 0,007  |                   |
| N                  | 1,52   | 5,98   |                   |
| error              | 0,82   | 1,3    |                   |
| 2s2                | 0,0327 | 0,0153 |                   |
| error              | 0,024  | 0,0024 |                   |

#### PtC\_h3po4\_100C\_Pt\_L3\_0066

| #                  | Pt-O   | Pt-Pt  | R-factor filtered |
|--------------------|--------|--------|-------------------|
| R [Å]              | 1,998  | 2,747  | 17,03             |
| error              | 0,051  | 0,0069 |                   |
| s [Å]              | 0,141  | 0,0835 |                   |
| error (inaccurate) | 0,056  | 0,007  |                   |
| N                  | 1,65   | 5,58   |                   |
| error              | 0,92   | 1,2    |                   |
| 2s2                | 0,0396 | 0,014  |                   |
| error              | 0,029  | 0,0023 |                   |

#### PtC\_h3po4\_100C\_Pt\_L3\_0067

| #                  | Pt-O   | Pt-Pt  | R-factor filtered |
|--------------------|--------|--------|-------------------|
| R [Å]              | 1,993  | 2,758  | 17,03             |
| error              | 0,043  | 0,0068 |                   |
| s [Å]              | 0,124  | 0,0785 |                   |
| error (inaccurate) | 0,048  | 0,0073 |                   |
| N                  | 1,48   | 4,9    |                   |
| error              | 0,77   | 1,1    |                   |
| 2s2                | 0,0305 | 0,0123 |                   |



|       |       |        |
|-------|-------|--------|
| error | 0,022 | 0,0023 |
|-------|-------|--------|

PtC\_h3po4\_100C\_Pt\_L3\_0068

| #                  | Pt-O   | Pt-Pt  | R-factor filtered |
|--------------------|--------|--------|-------------------|
| R [Å]              | 2,002  | 2,749  | 17,03             |
| error              | 0,046  | 0,0077 |                   |
| s [Å]              | 0,128  | 0,0879 |                   |
| error (inaccurate) | 0,051  | 0,0074 |                   |
| N                  | 1,52   | 5,67   |                   |
| error              | 0,82   | 1,3    |                   |
| 2s2                | 0,0328 | 0,0154 |                   |
| error              | 0,024  | 0,0026 |                   |

PtC\_h3po4\_100C\_Pt\_L3\_0069

| #                  | Pt-O   | Pt-Pt  | R-factor filtered |
|--------------------|--------|--------|-------------------|
| R [Å]              | 1,996  | 2,751  | 17,03             |
| error              | 0,055  | 0,0076 |                   |
| s [Å]              | 0,151  | 0,09   |                   |
| error (inaccurate) | 0,06   | 0,0073 |                   |
| N                  | 1,72   | 5,99   |                   |
| error              | 0,99   | 1,3    |                   |
| 2s2                | 0,0454 | 0,0162 |                   |
| error              | 0,033  | 0,0026 |                   |

PtC\_h3po4\_100C\_Pt\_L3\_0070

| #                  | Pt-O   | Pt-Pt  | R-factor filtered |
|--------------------|--------|--------|-------------------|
| R [Å]              | 1,986  | 2,748  | 17,03             |
| error              | 0,051  | 0,0074 |                   |
| s [Å]              | 0,145  | 0,0887 |                   |
| error (inaccurate) | 0,057  | 0,0071 |                   |
| N                  | 1,68   | 5,9    |                   |
| error              | 0,94   | 1,3    |                   |
| 2s2                | 0,0418 | 0,0157 |                   |
| error              | 0,03   | 0,0025 |                   |

PtC\_h3po4\_100C\_Pt\_L3\_0071

| #                  | Pt-O   | Pt-Pt  | R-factor filtered |
|--------------------|--------|--------|-------------------|
| R [Å]              | 1,971  | 2,746  | 18,06             |
| error              | 0,031  | 0,0077 |                   |
| s [Å]              | 0,0807 | 0,0906 |                   |
| error (inaccurate) | 0,047  | 0,0071 |                   |
| N                  | 0,959  | 6,31   |                   |
| error              | 0,51   | 1,4    |                   |
| 2s2                | 0,013  | 0,0164 |                   |
| error              | 0,012  | 0,0026 |                   |

PtC\_h3po4\_100C\_Pt\_L3\_0072

| # | Pt-O | Pt-Pt | R-factor filtered |
|---|------|-------|-------------------|
|---|------|-------|-------------------|

|                    |          |        |       |
|--------------------|----------|--------|-------|
| R [Å]              | 2,005    | 2,754  | 18,06 |
| error              | 0,049    | 0,0072 |       |
| s [Å]              | 0,138    | 0,0899 |       |
| error (inaccurate) | 0,056    | 0,007  |       |
| N                  | 1,6      | 6,2    |       |
| error              | 0,89     | 1,3    |       |
| 2s2                | 3,82E-02 | 0,0161 |       |
| error              | 0,028    | 0,0025 |       |

#### PtC\_h3po4\_100C\_Pt\_L3\_0073

| #                  | Pt-O   | Pt-Pt  | R-factor filtered |
|--------------------|--------|--------|-------------------|
| R [Å]              | 1,972  | 2,748  | 18,06             |
| error              | 0,056  | 0,0071 |                   |
| s [Å]              | 0,156  | 0,0871 |                   |
| error (inaccurate) | 0,062  | 0,0069 |                   |
| N                  | 1,78   | 5,93   |                   |
| error              | 1      | 1,3    |                   |
| 2s2                | 0,0488 | 0,0152 |                   |
| error              | 0,035  | 0,0024 |                   |

#### PtC\_h3po4\_100C\_Pt\_L3\_0074

| #                  | Pt-O   | Pt-Pt  | R-factor filtered |
|--------------------|--------|--------|-------------------|
| R [Å]              | 2,006  | 2,754  | 18,06             |
| error              | 0,042  | 0,0068 |                   |
| s [Å]              | 0,121  | 0,0816 |                   |
| error (inaccurate) | 0,048  | 0,0072 |                   |
| N                  | 1,47   | 5,24   |                   |
| error              | 0,76   | 1,1    |                   |
| 2s2                | 0,0292 | 0,0133 |                   |
| error              | 0,021  | 0,0024 |                   |

#### PtC\_h3po4\_100C\_Pt\_L3\_0075

| #                  | Pt-O   | Pt-Pt  | R-factor filtered |
|--------------------|--------|--------|-------------------|
| R [Å]              | 1,996  | 2,751  | 18,06             |
| error              | 0,048  | 0,0072 |                   |
| s [Å]              | 0,136  | 0,0854 |                   |
| error (inaccurate) | 0,053  | 0,0072 |                   |
| N                  | 1,62   | 5,59   |                   |
| error              | 0,88   | 1,2    |                   |
| 2s2                | 0,0371 | 0,0146 |                   |
| error              | 0,027  | 0,0025 |                   |

#### PtC\_h3po4\_100C\_Pt\_L3\_0076

| #                  | Pt-O  | Pt-Pt  | R-factor filtered |
|--------------------|-------|--------|-------------------|
| R [Å]              | 1,999 | 2,748  | 18,06             |
| error              | 0,049 | 0,0074 |                   |
| s [Å]              | 0,137 | 0,0864 |                   |
| error (inaccurate) | 0,053 | 0,0071 |                   |

|       |        |        |
|-------|--------|--------|
| N     | 1,64   | 5,71   |
| error | 0,89   | 1,2    |
| 2s2   | 0,0375 | 0,0149 |
| error | 0,027  | 0,0025 |

#### PtC\_h3po4\_100C\_Pt\_L3\_0077

| #                  | Pt-O   | Pt-Pt  | R-factor filtered |
|--------------------|--------|--------|-------------------|
| R [Å]              | 1,987  | 2,75   | 18,06             |
| error              | 0,041  | 0,0079 |                   |
| s [Å]              | 0,111  | 0,0907 |                   |
| error (inaccurate) | 0,048  | 0,0071 |                   |
| N                  | 1,27   | 6,24   |                   |
| error              | 0,69   | 1,4    |                   |
| 2s2                | 0,0248 | 0,0165 |                   |
| error              | 0,019  | 0,0026 |                   |

#### PtC\_h3po4\_100C\_Pt\_L3\_0078

| #                  | Pt-O    | Pt-Pt  | R-factor filtered |
|--------------------|---------|--------|-------------------|
| R [Å]              | 1,974   | 2,747  | 18,06             |
| error              | 0,026   | 0,008  |                   |
| s [Å]              | 0,0561  | 0,0914 |                   |
| error (inaccurate) | 0,034   | 0,0072 |                   |
| N                  | 0,717   | 6,42   |                   |
| error              | 0,41    | 1,4    |                   |
| 2s2                | 0,00629 | 0,0167 |                   |
| error              | 0,01    | 0,0026 |                   |

#### PtC\_h3po4\_100C\_Pt\_L3\_0079\_1

| #                  | Pt-O   | Pt-Pt  | R-factor filtered |
|--------------------|--------|--------|-------------------|
| R [Å]              | 1,982  | 2,74   | 13,44             |
| error              | 0,055  | 0,0094 |                   |
| s [Å]              | 0,154  | 0,0943 |                   |
| error (inaccurate) | 0,06   | 0,011  |                   |
| N                  | 1,82   | 6,52   |                   |
| error              | 1      | 1,8    |                   |
| 2s2                | 0,0477 | 0,0178 |                   |
| error              | 0,034  | 0,004  |                   |

| Sample                    | Time (min) |
|---------------------------|------------|
| PtC_dry_Pt_L3             | 0          |
| PtC_dry_140C_Pt_L3        | 0          |
| PtC_h3po4_140C_Pt_L3      | 3          |
| PtC_h3po4_140C_Pt_L3_0001 | 6          |
| PtC_h3po4_140C_Pt_L3_0002 | 9          |
| PtC_h3po4_140C_Pt_L3_0003 | 12         |
| PtC_h3po4_140C_Pt_L3_0004 | 15         |
| PtC_h3po4_140C_Pt_L3_0005 | 18         |
| PtC_h3po4_140C_Pt_L3_0006 | 21         |
| PtC_h3po4_140C_Pt_L3_0007 | 24         |
| PtC_h3po4_140C_Pt_L3_0008 | 27         |
| PtC_h3po4_140C_Pt_L3_0009 | 30         |
| PtC_h3po4_140C_Pt_L3_0010 | 33         |
| PtC_h3po4_140C_Pt_L3_0011 | 36         |
| PtC_h3po4_140C_Pt_L3_0012 | 39         |
| PtC_h3po4_140C_Pt_L3_0013 | 42         |
| PtC_h3po4_140C_Pt_L3_0014 | 45         |
| PtC_h3po4_140C_Pt_L3_0015 | 48         |
| PtC_h3po4_140C_Pt_L3_0016 | 51         |
| PtC_h3po4_140C_Pt_L3_0017 | 54         |
| PtC_h3po4_140C_Pt_L3_0018 | 57         |
| PtC_h3po4_140C_Pt_L3_0019 | 60         |
| PtC_h3po4_140C_Pt_L3_0020 | 63         |
| PtC_h3po4_140C_Pt_L3_0021 | 66         |
| PtC_h3po4_140C_Pt_L3_0022 | 69         |
| PtC_h3po4_140C_Pt_L3_0023 | 72         |
| PtC_h3po4_140C_Pt_L3_0024 | 75         |
| PtC_h3po4_140C_Pt_L3_0025 | 78         |
| PtC_h3po4_140C_Pt_L3_0026 | 81         |
| PtC_h3po4_140C_Pt_L3_0027 | 84         |
| PtC_h3po4_140C_Pt_L3_0028 | 87         |
| PtC_h3po4_140C_Pt_L3_0029 | 90         |
| PtC_h3po4_140C_Pt_L3_0030 | 93         |
| PtC_h3po4_140C_Pt_L3_0031 | 96         |
| PtC_h3po4_140C_Pt_L3_0032 | 99         |
| PtC_h3po4_140C_Pt_L3_0033 | 102        |
| PtC_h3po4_140C_Pt_L3_0034 | 105        |
| PtC_h3po4_140C_Pt_L3_0035 | 108        |
| PtC_h3po4_140C_Pt_L3_0036 | 111        |
| PtC_h3po4_140C_Pt_L3_0037 | 114        |
| PtC_h3po4_140C_Pt_L3_0038 | 117        |
| PtC_h3po4_140C_Pt_L3_0039 | 120        |
| PtC_h3po4_140C_Pt_L3_0040 | 123        |
| PtC_h3po4_140C_Pt_L3_0041 | 126        |
| PtC_h3po4_140C_Pt_L3_0042 | 129        |
| PtC_h3po4_140C_Pt_L3_0043 | 132        |

|                           |     |
|---------------------------|-----|
| PtC_h3po4_140C_Pt_L3_0044 | 135 |
| PtC_h3po4_140C_Pt_L3_0045 | 138 |
| PtC_h3po4_140C_Pt_L3_0046 | 141 |
| PtC_h3po4_140C_Pt_L3_0047 | 144 |
| PtC_h3po4_140C_Pt_L3_0048 | 147 |
| PtC_h3po4_140C_Pt_L3_0049 | 150 |
| PtC_h3po4_140C_Pt_L3_0050 | 153 |
| PtC_h3po4_140C_Pt_L3_0051 | 156 |
| PtC_h3po4_140C_Pt_L3_0052 | 159 |
| PtC_h3po4_140C_Pt_L3_0053 | 162 |
| PtC_h3po4_140C_Pt_L3_0054 | 165 |
| PtC_h3po4_140C_Pt_L3_0055 | 168 |
| PtC_h3po4_140C_Pt_L3_0056 | 171 |
| PtC_h3po4_140C_Pt_L3_0057 | 174 |
| PtC_h3po4_140C_Pt_L3_0058 | 177 |
| PtC_h3po4_140C_Pt_L3_0059 | 180 |
| PtC_h3po4_140C_Pt_L3_0060 | 183 |
| PtC_h3po4_140C_Pt_L3_0061 | 186 |
| PtC_h3po4_140C_Pt_L3_0062 | 189 |
| PtC_h3po4_140C_Pt_L3_0063 | 192 |
| PtC_h3po4_140C_Pt_L3_0064 | 195 |
| PtC_h3po4_140C_Pt_L3_0065 | 198 |
| PtC_h3po4_140C_Pt_L3_0066 | 201 |
| PtC_h3po4_140C_Pt_L3_0067 | 204 |
| PtC_h3po4_140C_Pt_L3_0068 | 207 |
| PtC_h3po4_140C_Pt_L3_0069 | 210 |
| PtC_h3po4_140C_Pt_L3_0070 | 213 |
| PtC_h3po4_140C_Pt_L3_0071 | 216 |
| PtC_h3po4_140C_Pt_L3_0072 | 219 |
| PtC_h3po4_140C_Pt_L3_0073 | 222 |
| PtC_h3po4_140C_Pt_L3_0074 | 225 |
| PtC_h3po4_140C_Pt_L3_0075 | 228 |
| PtC_h3po4_140C_Pt_L3_0076 | 231 |
| PtC_h3po4_140C_Pt_L3_0077 | 234 |
| PtC_h3po4_140C_Pt_L3_0078 | 237 |
| PtC_h3po4_140C_Pt_L3_0079 | 240 |

PtC\_dry\_Pt\_L3

S02 = 0,92457225

| #                  | Pt-O   | Pt-Pt  | R-factor filtered |
|--------------------|--------|--------|-------------------|
| R [Å]              | 2,014  | 2,754  | 18,68             |
| error              | 0,023  | 0,0085 |                   |
| s [Å]              | 0,0915 | 0,0801 |                   |
| error (inaccurate) | 0,023  | 0,0098 |                   |
| N                  | 1,94   | 3,86   |                   |
| error              | 0,59   | 1,1    |                   |
| 2s2                | 0,017  | 0,013  |                   |
| error              | 0,008  | 0,003  |                   |

PtC\_dry\_140C\_Pt\_L3

| #                  | Pt-O   | Pt-Pt  | R-factor filtered |
|--------------------|--------|--------|-------------------|
| R [Å]              | 2,013  | 2,751  | 18,68             |
| error              | 0,028  | 0,012  |                   |
| s [Å]              | 0,103  | 0,0976 |                   |
| error (inaccurate) | 0,028  | 0,011  |                   |
| N                  | 1,9    | 4,86   |                   |
| error              | 0,67   | 1,6    |                   |
| 2s2                | 0,0214 | 0,019  |                   |
| error              | 0,011  | 0,0041 |                   |

PtC\_h3po4\_140C\_Pt\_L3

| #                  | Pt-O    | Pt-Pt  | R-factor filtered |
|--------------------|---------|--------|-------------------|
| R [Å]              | 1,984*  | 2,749  | 18,68             |
| error              |         | 0,0074 |                   |
| s [Å]              | 0,18*   | 0,0868 |                   |
| error (inaccurate) |         | 0,0062 |                   |
| N                  | 0*      | 6,69   |                   |
| error              |         | 1,3    |                   |
| 2s2                | 0,0646* | 0,0151 |                   |
| error              |         | 0,0021 |                   |

PtC\_h3po4\_140C\_Pt\_L3\_0001

| #                  | Pt-O    | Pt-Pt  | R-factor filtered |
|--------------------|---------|--------|-------------------|
| R [Å]              | 2,002*  | 2,753  | 18,68             |
| error              |         | 0,0078 |                   |
| s [Å]              | 0,172*  | 0,0923 |                   |
| error (inaccurate) |         | 0,0062 |                   |
| N                  | 0*      | 7,34   |                   |
| error              |         | 1,4    |                   |
| 2s2                | 0,0594* | 0,0171 |                   |
| error              |         | 0,0023 |                   |

PtC\_h3po4\_140C\_Pt\_L3\_0002

| #     | Pt-O   | Pt-Pt  | R-factor filtered |
|-------|--------|--------|-------------------|
| R [Å] | 1,972* | 2,748  | 18,68             |
| error |        | 0,0075 |                   |

|                    |         |          |
|--------------------|---------|----------|
| s [Å]              | 0,197*  | 0,0889   |
| error (inaccurate) |         | 0,0061   |
| N                  | 0*      | 7        |
| error              |         | 1,3      |
| 2s2                | 0,0775* | 1,58E-02 |
| error              |         | 0,0022   |

#### PtC\_h3po4\_140C\_Pt\_L3\_0003

| #                  | Pt-O    | Pt-Pt  | R-factor filtered |
|--------------------|---------|--------|-------------------|
| R [Å]              | 1,988*  | 2,75   | 18,68             |
| error              |         | 0,0074 |                   |
| s [Å]              | 0,174*  | 0,0906 |                   |
| error (inaccurate) |         | 0,006  |                   |
| N                  | 0*      | 7,35   |                   |
| error              |         | 1,4    |                   |
| 2s2                | 0,0606* | 0,0164 |                   |
| error              |         | 0,0022 |                   |

#### PtC\_h3po4\_140C\_Pt\_L3\_0004

| #                  | Pt-O    | Pt-Pt  | R-factor filtered |
|--------------------|---------|--------|-------------------|
| R [Å]              | 1,985*  | 2,75   | 18,68             |
| error              |         | 0,0073 |                   |
| s [Å]              | 0,187*  | 0,0892 |                   |
| error (inaccurate) |         | 0,0059 |                   |
| N                  | 0*      | 7,24   |                   |
| error              |         | 1,3    |                   |
| 2s2                | 0,0697* | 0,0159 |                   |
| error              |         | 0,0021 |                   |

#### PtC\_h3po4\_140C\_Pt\_L3\_0005

| #                  | Pt-O    | Pt-Pt  | R-factor filtered |
|--------------------|---------|--------|-------------------|
| R [Å]              | 1,989*  | 2,747  | 18,68             |
| error              |         | 0,0072 |                   |
| s [Å]              | 0,178*  | 0,0879 |                   |
| error (inaccurate) |         | 0,0059 |                   |
| N                  | 0*      | 7,05   |                   |
| error              |         | 1,3    |                   |
| 2s2                | 0,0635* | 0,0154 |                   |
| error              |         | 0,0021 |                   |

#### PtC\_h3po4\_140C\_Pt\_L3\_0006

| #                  | Pt-O   | Pt-Pt  | R-factor filtered |
|--------------------|--------|--------|-------------------|
| R [Å]              | 1,993* | 2,749  | 18,68             |
| error              |        | 0,0076 |                   |
| s [Å]              | 0,18*  | 0,0907 |                   |
| error (inaccurate) |        | 0,0061 |                   |
| N                  | 0*     | 7,28   |                   |
| error              |        | 1,4    |                   |

|       |         |        |
|-------|---------|--------|
| 2s2   | 0,0648* | 0,0165 |
| error |         | 0,0022 |

#### PtC\_h3po4\_140C\_Pt\_L3\_0007

| #                  | Pt-O   | Pt-Pt  | R-factor filtered |
|--------------------|--------|--------|-------------------|
| R [Å]              | 1,971* | 2,747  | 18,68             |
| error              |        | 0,0075 |                   |
| s [Å]              | 0*     | 0,0892 |                   |
| error (inaccurate) |        | 0,0061 |                   |
| N                  | 0*     | 7,09   |                   |
| error              |        | 1,3    |                   |
| 2s2                | 0*     | 0,0159 |                   |
| error              |        | 0,0022 |                   |

#### PtC\_h3po4\_140C\_Pt\_L3\_0008

| #                  | Pt-O  | Pt-Pt  | R-factor filtered |
|--------------------|-------|--------|-------------------|
| R [Å]              | 1,95* | 2,745  | 18,68             |
| error              |       | 0,0046 |                   |
| s [Å]              | 0*    | 0,0901 |                   |
| error (inaccurate) |       | 0,006  |                   |
| N                  | 0*    | 7,31   |                   |
| error              |       | 1,4    |                   |
| 2s2                | 0*    | 0,0163 |                   |
| error              |       | 0,0021 |                   |

#### PtC\_h3po4\_140C\_Pt\_L3\_0009

| #                  | Pt-O    | Pt-Pt  | R-factor filtered |
|--------------------|---------|--------|-------------------|
| R [Å]              | 1,97*   | 2,749  | 18,68             |
| error              |         | 0,0073 |                   |
| s [Å]              | 0,198*  | 0,0888 |                   |
| error (inaccurate) |         | 0,0059 |                   |
| N                  | 0*      | 7,24   |                   |
| error              |         | 1,3    |                   |
| 2s2                | 0,0782* | 0,0158 |                   |
| error              |         | 0,0021 |                   |

#### PtC\_h3po4\_140C\_Pt\_L3\_0010

| #                  | Pt-O    | Pt-Pt  | R-factor filtered |
|--------------------|---------|--------|-------------------|
| R [Å]              | 1,971*  | 2,753  | 18,68             |
| error              |         | 0,0072 |                   |
| s [Å]              | 0,202*  | 0,0901 |                   |
| error (inaccurate) |         | 0,0058 |                   |
| N                  | 0*      | 7,53   |                   |
| error              |         | 1,4    |                   |
| 2s2                | 0,0816* | 0,0162 |                   |
| error              |         | 0,0021 |                   |

#### PtC\_h3po4\_140C\_Pt\_L3\_0011



| #                  | Pt-O    | Pt-Pt  | R-factor filtered |
|--------------------|---------|--------|-------------------|
| R [Å]              | 1,973*  | 2,747  | 18,57             |
| error              |         | 0,0073 |                   |
| s [Å]              | 0,195*  | 0,0885 |                   |
| error (inaccurate) |         | 0,006  |                   |
| N                  | 0*      | 7,06   |                   |
| error              |         | 1,3    |                   |
| 2s2                | 0,0758* | 0,0157 |                   |
| error              |         | 0,0021 |                   |

#### PtC\_h3po4\_140C\_Pt\_L3\_0012

| #                  | Pt-O    | Pt-Pt  | R-factor filtered |
|--------------------|---------|--------|-------------------|
| R [Å]              | 1,982*  | 2,75   | 18,57             |
| error              |         | 0,0071 |                   |
| s [Å]              | 0,188*  | 0,0908 |                   |
| error (inaccurate) |         | 0,0057 |                   |
| N                  | 0*      | 7,74   |                   |
| error              |         | 1,4    |                   |
| 2s2                | 0,0706* | 0,0165 |                   |
| error              |         | 0,0021 |                   |

#### PtC\_h3po4\_140C\_Pt\_L3\_0013

| #                  | Pt-O    | Pt-Pt  | R-factor filtered |
|--------------------|---------|--------|-------------------|
| R [Å]              | 1,967*  | 2,749  | 18,57             |
| error              |         | 0,0069 |                   |
| s [Å]              | 0,201*  | 0,0895 |                   |
| error (inaccurate) |         | 0,0056 |                   |
| N                  | 0*      | 7,72   |                   |
| error              |         | 1,3    |                   |
| 2s2                | 0,0812* | 0,016  |                   |
| error              |         | 0,002  |                   |

#### PtC\_h3po4\_140C\_Pt\_L3\_0014

| #                  | Pt-O    | Pt-Pt  | R-factor filtered |
|--------------------|---------|--------|-------------------|
| R [Å]              | 1,979*  | 2,753  | 18,57             |
| error              |         | 0,0071 |                   |
| s [Å]              | 0,185*  | 0,0847 |                   |
| error (inaccurate) |         | 0,006  |                   |
| N                  | 0*      | 6,63   |                   |
| error              |         | 1,2    |                   |
| 2s2                | 0,0683* | 0,0144 |                   |
| error              |         | 0,002  |                   |

#### PtC\_h3po4\_140C\_Pt\_L3\_0015

| #     | Pt-O   | Pt-Pt  | R-factor filtered |
|-------|--------|--------|-------------------|
| R [Å] | 1,988* | 2,755  | 18,57             |
| error |        | 0,0072 |                   |
| s [Å] | 0,181* | 0,0889 |                   |

|                    |         |        |
|--------------------|---------|--------|
| error (inaccurate) |         | 0,0059 |
| N                  | 0*      | 7,23   |
| error              |         | 1,3    |
| 2s2                | 0,0652* | 0,0158 |
| error              |         | 0,0021 |

#### PtC\_h3po4\_140C\_Pt\_L3\_0016

| #                  | Pt-O    | Pt-Pt  | R-factor filtered |
|--------------------|---------|--------|-------------------|
| R [Å]              | 1,963*  | 2,748  | 18,57             |
| error              |         | 0,0074 |                   |
| s [Å]              | 0,199*  | 0,0917 |                   |
| error (inaccurate) |         | 0,0059 |                   |
| N                  | 0*      | 7,62   |                   |
| error              |         | 1,4    |                   |
| 2s2                | 0,0795* | 0,0168 |                   |
| error              |         | 0,0022 |                   |

#### PtC\_h3po4\_140C\_Pt\_L3\_0017

| #                  | Pt-O    | Pt-Pt  | R-factor filtered |
|--------------------|---------|--------|-------------------|
| R [Å]              | 1,982*  | 2,752  | 18,57             |
| error              |         | 0,007  |                   |
| s [Å]              | 0,186*  | 0,0884 |                   |
| error (inaccurate) |         | 0,0058 |                   |
| N                  | 0*      | 7,3    |                   |
| error              |         | 1,3    |                   |
| 2s2                | 0,0691* | 0,0156 |                   |
| error              |         | 0,002  |                   |

#### PtC\_h3po4\_140C\_Pt\_L3\_0018

| #                  | Pt-O    | Pt-Pt  | R-factor filtered |
|--------------------|---------|--------|-------------------|
| R [Å]              | 1,968*  | 2,749  | 18,57             |
| error              |         | 0,0073 |                   |
| s [Å]              | 0,195*  | 0,0889 |                   |
| error (inaccurate) |         | 0,0059 |                   |
| N                  | 0*      | 7,19   |                   |
| error              |         | 1,3    |                   |
| 2s2                | 0,0764* | 0,0158 |                   |
| error              |         | 0,0021 |                   |

#### PtC\_h3po4\_140C\_Pt\_L3\_0019

| #                  | Pt-O   | Pt-Pt  | R-factor filtered |
|--------------------|--------|--------|-------------------|
| R [Å]              | 1,962* | 2,751  | 18,57             |
| error              |        | 0,0072 |                   |
| s [Å]              | 0,201* | 0,0885 |                   |
| error (inaccurate) |        | 0,0059 |                   |
| N                  | 0*     | 7,25   |                   |
| error              |        | 1,3    |                   |
| 2s2                | 0,081* | 0,0157 |                   |

|       |        |
|-------|--------|
| error | 0,0021 |
|-------|--------|

PtC\_h3po4\_140C\_Pt\_L3\_0020

| #                  | Pt-O    | Pt-Pt  | R-factor filtered |
|--------------------|---------|--------|-------------------|
| R [Å]              | 1,973*  | 2,753  | 18,57             |
| error              |         | 0,0072 |                   |
| s [Å]              | 0,188*  | 0,0889 |                   |
| error (inaccurate) |         | 0,0059 |                   |
| N                  | 0*      | 7,24   |                   |
| error              |         | 1,3    |                   |
| 2s2                | 0,0705* | 0,0158 |                   |
| error              |         | 0,0021 |                   |

PtC\_h3po4\_140C\_Pt\_L3\_0021

| #                  | Pt-O    | Pt-Pt  | R-factor filtered |
|--------------------|---------|--------|-------------------|
| R [Å]              | 1,976*  | 2,75   | 17,87             |
| error              |         | 0,0073 |                   |
| s [Å]              | 0,193*  | 0,092  |                   |
| error (inaccurate) |         | 0,0058 |                   |
| N                  | 0*      | 7,76   |                   |
| error              |         | 1,4    |                   |
| 2s2                | 0,0743* | 0,0169 |                   |
| error              |         | 0,0021 |                   |

PtC\_h3po4\_140C\_Pt\_L3\_0022

| #                  | Pt-O    | Pt-Pt  | R-factor filtered |
|--------------------|---------|--------|-------------------|
| R [Å]              | 1,972*  | 2,753  | 17,87             |
| error              |         | 0,0071 |                   |
| s [Å]              | 0,195*  | 0,0889 |                   |
| error (inaccurate) |         | 0,0058 |                   |
| N                  | 0*      | 7,33   |                   |
| error              |         | 1,3    |                   |
| 2s2                | 0,0759* | 0,0158 |                   |
| error              |         | 0,0021 |                   |

PtC\_h3po4\_140C\_Pt\_L3\_0023

| #                  | Pt-O    | Pt-Pt  | R-factor filtered |
|--------------------|---------|--------|-------------------|
| R [Å]              | 1,958*  | 2,748  | 17,87             |
| error              |         | 0,0067 |                   |
| s [Å]              | 0,207*  | 0,0862 |                   |
| error (inaccurate) |         | 0,0056 |                   |
| N                  | 0*      | 7,24   |                   |
| error              |         | 1,3    |                   |
| 2s2                | 0,0856* | 0,0149 |                   |
| error              |         | 0,0019 |                   |

PtC\_h3po4\_140C\_Pt\_L3\_0024

| # | Pt-O | Pt-Pt | R-factor filtered |
|---|------|-------|-------------------|
|---|------|-------|-------------------|

|                    |         |        |       |
|--------------------|---------|--------|-------|
| R [Å]              | 1,981*  | 2,753  | 17,87 |
| error              |         | 0,0069 |       |
| s [Å]              | 0,18*   | 0,0848 |       |
| error (inaccurate) |         | 0,0058 |       |
| N                  | 0*      | 6,76   |       |
| error              |         | 1,2    |       |
| 2s2                | 0,0648* | 0,0144 |       |
| error              |         | 0,002  |       |

#### PtC\_h3po4\_140C\_Pt\_L3\_0025

| #                  | Pt-O    | Pt-Pt  | R-factor filtered |
|--------------------|---------|--------|-------------------|
| R [Å]              | 1,986*  | 2,752  | 17,87             |
| error              |         | 0,0072 |                   |
| s [Å]              | 0,181*  | 0,0909 |                   |
| error (inaccurate) |         | 0,0058 |                   |
| N                  | 0*      | 7,57   |                   |
| error              |         | 1,4    |                   |
| 2s2                | 0,0656* | 0,0165 |                   |
| error              |         | 0,0021 |                   |

#### PtC\_h3po4\_140C\_Pt\_L3\_0026

| #                  | Pt-O    | Pt-Pt  | R-factor filtered |
|--------------------|---------|--------|-------------------|
| R [Å]              | 1,954*  | 2,749  | 17,87             |
| error              |         | 0,007  |                   |
| s [Å]              | 0,209*  | 0,0894 |                   |
| error (inaccurate) |         | 0,0057 |                   |
| N                  | 0*      | 7,59   |                   |
| error              |         | 1,3    |                   |
| 2s2                | 0,0874* | 0,016  |                   |
| error              |         | 0,002  |                   |

#### PtC\_h3po4\_140C\_Pt\_L3\_0027

| #                  | Pt-O    | Pt-Pt  | R-factor filtered |
|--------------------|---------|--------|-------------------|
| R [Å]              | 1,974*  | 2,753  | 17,87             |
| error              |         | 0,0069 |                   |
| s [Å]              | 0,187*  | 0,087  |                   |
| error (inaccurate) |         | 0,0057 |                   |
| N                  | 0*      | 7,2    |                   |
| error              |         | 1,3    |                   |
| 2s2                | 0,0699* | 0,0151 |                   |
| error              |         | 0,002  |                   |

#### PtC\_h3po4\_140C\_Pt\_L3\_0028

| #                  | Pt-O   | Pt-Pt  | R-factor filtered |
|--------------------|--------|--------|-------------------|
| R [Å]              | 1,986* | 2,752  | 17,87             |
| error              |        | 0,0069 |                   |
| s [Å]              | 0,174* | 0,0878 |                   |
| error (inaccurate) |        | 0,0057 |                   |

|       |         |        |
|-------|---------|--------|
| N     | 0*      | 7,26   |
| error |         | 1,3    |
| 2s2   | 0,0604* | 0,0154 |
| error |         | 0,002  |

#### PtC\_h3po4\_140C\_Pt\_L3\_0029

| #                  | Pt-O    | Pt-Pt  | R-factor filtered |
|--------------------|---------|--------|-------------------|
| R [Å]              | 1,963*  | 2,751  | 17,87             |
| error              |         | 0,0069 |                   |
| s [Å]              | 0,199*  | 0,0854 |                   |
| error (inaccurate) |         | 0,0058 |                   |
| N                  | 0*      | 6,93   |                   |
| error              |         | 1,2    |                   |
| 2s2                | 0,0795* | 0,0146 |                   |
| error              |         | 0,002  |                   |

#### PtC\_h3po4\_140C\_Pt\_L3\_0030

| #                  | Pt-O    | Pt-Pt  | R-factor filtered |
|--------------------|---------|--------|-------------------|
| R [Å]              | 1,972*  | 2,752  | 17,87             |
| error              |         | 0,0069 |                   |
| s [Å]              | 0,188*  | 0,0893 |                   |
| error (inaccurate) |         | 0,0056 |                   |
| N                  | 0*      | 7,66   |                   |
| error              |         | 1,3    |                   |
| 2s2                | 0,0705* | 0,0159 |                   |
| error              |         | 0,002  |                   |

#### PtC\_h3po4\_140C\_Pt\_L3\_0031

| #                  | Pt-O   | Pt-Pt  | R-factor filtered |
|--------------------|--------|--------|-------------------|
| R [Å]              | 2,002* | 2,753  | 17,38             |
| error              |        | 0,0067 |                   |
| s [Å]              | 0,157* | 0,0874 |                   |
| error (inaccurate) |        | 0,0055 |                   |
| N                  | 0*     | 7,4    |                   |
| error              |        | 1,3    |                   |
| 2s2                | 0,049* | 0,0153 |                   |
| error              |        | 0,0019 |                   |

#### PtC\_h3po4\_140C\_Pt\_L3\_0032

| #                  | Pt-O    | Pt-Pt  | R-factor filtered |
|--------------------|---------|--------|-------------------|
| R [Å]              | 1,961*  | 2,754  | 17,38             |
| error              |         | 0,0066 |                   |
| s [Å]              | 0,207*  | 0,0842 |                   |
| error (inaccurate) |         | 0,0057 |                   |
| N                  | 0*      | 6,95   |                   |
| error              |         | 1,2    |                   |
| 2s2                | 0,0859* | 0,0142 |                   |
| error              |         | 0,0019 |                   |

## PtC\_h3po4\_140C\_Pt\_L3\_0033

| #                  | Pt-O   | Pt-Pt  | R-factor filtered |
|--------------------|--------|--------|-------------------|
| R [Å]              | 1,978* | 2,755  | 17,38             |
| error              |        | 0,0066 |                   |
| s [Å]              | 0,173* | 0,0859 |                   |
| error (inaccurate) |        | 0,0056 |                   |
| N                  | 0*     | 7,26   |                   |
| error              |        | 1,2    |                   |
| 2s2                | 0,06*  | 0,0147 |                   |
| error              |        | 0,0019 |                   |

## PtC\_h3po4\_140C\_Pt\_L3\_0034

| #                  | Pt-O    | Pt-Pt  | R-factor filtered |
|--------------------|---------|--------|-------------------|
| R [Å]              | 1,989*  | 2,752  | 17,38             |
| error              |         | 0,0067 |                   |
| s [Å]              | 0,171*  | 0,0866 |                   |
| error (inaccurate) |         | 0,0056 |                   |
| N                  | 0*      | 7,26   |                   |
| error              |         | 1,3    |                   |
| 2s2                | 0,0586* | 0,015  |                   |
| error              |         | 0,0019 |                   |

## PtC\_h3po4\_140C\_Pt\_L3\_0035

| #                  | Pt-O    | Pt-Pt  | R-factor filtered |
|--------------------|---------|--------|-------------------|
| R [Å]              | 1,983*  | 2,752  | 17,38             |
| error              |         | 0,0067 |                   |
| s [Å]              | 0,188*  | 0,0866 |                   |
| error (inaccurate) |         | 0,0056 |                   |
| N                  | 0*      | 7,29   |                   |
| error              |         | 1,3    |                   |
| 2s2                | 0,0703* | 0,015  |                   |
| error              |         | 0,0019 |                   |

## PtC\_h3po4\_140C\_Pt\_L3\_0036

| #                  | Pt-O    | Pt-Pt  | R-factor filtered |
|--------------------|---------|--------|-------------------|
| R [Å]              | 1,96*   | 2,751  | 17,38             |
| error              |         | 0,0043 |                   |
| s [Å]              | 0,203*  | 0,0884 |                   |
| error (inaccurate) |         | 0,0056 |                   |
| N                  | 0*      | 7,5    |                   |
| error              |         | 1,3    |                   |
| 2s2                | 0,0827* | 0,0156 |                   |
| error              |         | 0,002  |                   |

## PtC\_h3po4\_140C\_Pt\_L3\_0037

| #     | Pt-O   | Pt-Pt | R-factor filtered |
|-------|--------|-------|-------------------|
| R [Å] | 1,957* | 2,744 | 17,38             |

|                    |        |        |
|--------------------|--------|--------|
| error              |        | 0,0067 |
| s [Å]              | 0,196* | 0,0871 |
| error (inaccurate) |        | 0,0055 |
| N                  | 0*     | 7,43   |
| error              |        | 1,3    |
| 2s2                | 0,077* | 0,0152 |
| error              |        | 0,0019 |

#### PtC\_h3po4\_140C\_Pt\_L3\_0038

| #                  | Pt-O    | Pt-Pt  | R-factor filtered |
|--------------------|---------|--------|-------------------|
| R [Å]              | 1,959*  | 2,749  | 17,38             |
| error              |         | 0,0067 |                   |
| s [Å]              | 0,199*  | 0,0855 |                   |
| error (inaccurate) |         | 0,0057 |                   |
| N                  | 0*      | 7,07   |                   |
| error              |         | 1,2    |                   |
| 2s2                | 0,0793* | 0,0146 |                   |
| error              |         | 0,0019 |                   |

#### PtC\_h3po4\_140C\_Pt\_L3\_0039

| #                  | Pt-O    | Pt-Pt  | R-factor filtered |
|--------------------|---------|--------|-------------------|
| R [Å]              | 1,996*  | 2,757  | 17,38             |
| error              |         | 0,0069 |                   |
| s [Å]              | 0,165*  | 0,0854 |                   |
| error (inaccurate) |         | 0,0058 |                   |
| N                  | 0*      | 6,88   |                   |
| error              |         | 1,2    |                   |
| 2s2                | 0,0542* | 0,0146 |                   |
| error              |         | 0,002  |                   |

#### PtC\_h3po4\_140C\_Pt\_L3\_0040

| #                  | Pt-O    | Pt-Pt  | R-factor filtered |
|--------------------|---------|--------|-------------------|
| R [Å]              | 1,983*  | 2,754  | 17,38             |
| error              |         | 0,0072 |                   |
| s [Å]              | 0,167*  | 0,0885 |                   |
| error (inaccurate) |         | 0,0059 |                   |
| N                  | 0*      | 7,16   |                   |
| error              |         | 1,3    |                   |
| 2s2                | 0,0561* | 0,0157 |                   |
| error              |         | 0,0021 |                   |

#### PtC\_h3po4\_140C\_Pt\_L3\_0041

| #                  | Pt-O   | Pt-Pt  | R-factor filtered |
|--------------------|--------|--------|-------------------|
| R [Å]              | 1,977* | 2,751  | 18,61             |
| error              |        | 0,0068 |                   |
| s [Å]              | 0,178* | 0,0884 |                   |
| error (inaccurate) |        | 0,0056 |                   |
| N                  | 0*     | 7,47   |                   |

|       |         |        |
|-------|---------|--------|
| error |         | 1,3    |
| 2s2   | 0,0637* | 0,0156 |
| error |         | 0,002  |

#### PtC\_h3po4\_140C\_Pt\_L3\_0042

| #                  | Pt-O    | Pt-Pt  | R-factor filtered |
|--------------------|---------|--------|-------------------|
| R [Å]              | 1,967*  | 2,756  | 18,61             |
| error              |         | 0,0065 |                   |
| s [Å]              | 0,184*  | 0,0855 |                   |
| error (inaccurate) |         | 0,0055 |                   |
| N                  | 0*      | 7,27   |                   |
| error              |         | 1,2    |                   |
| 2s2                | 0,0677* | 0,0146 |                   |
| error              |         | 0,0019 |                   |

#### PtC\_h3po4\_140C\_Pt\_L3\_0043

| #                  | Pt-O    | Pt-Pt  | R-factor filtered |
|--------------------|---------|--------|-------------------|
| R [Å]              | 2,004*  | 2,758  | 18,61             |
| error              |         | 0,0069 |                   |
| s [Å]              | 0,151*  | 0,0869 |                   |
| error (inaccurate) |         | 0,0058 |                   |
| N                  | 0*      | 7,02   |                   |
| error              |         | 1,3    |                   |
| 2s2                | 0,0457* | 0,0151 |                   |
| error              |         | 0,002  |                   |

#### PtC\_h3po4\_140C\_Pt\_L3\_0044

| #                  | Pt-O    | Pt-Pt  | R-factor filtered |
|--------------------|---------|--------|-------------------|
| R [Å]              | 1,981*  | 2,754  | 18,61             |
| error              |         | 0,0069 |                   |
| s [Å]              | 0,19*   | 0,09   |                   |
| error (inaccurate) |         | 0,0057 |                   |
| N                  | 0*      | 7,69   |                   |
| error              |         | 1,3    |                   |
| 2s2                | 0,0723* | 0,0162 |                   |
| error              |         | 0,002  |                   |

#### PtC\_h3po4\_140C\_Pt\_L3\_0045

| #                  | Pt-O    | Pt-Pt  | R-factor filtered |
|--------------------|---------|--------|-------------------|
| R [Å]              | 1,983*  | 2,753  | 18,61             |
| error              |         | 0,0068 |                   |
| s [Å]              | 0,17*   | 0,0872 |                   |
| error (inaccurate) |         | 0,0056 |                   |
| N                  | 0*      | 7,32   |                   |
| error              |         | 1,3    |                   |
| 2s2                | 0,0579* | 0,0152 |                   |
| error              |         | 0,002  |                   |



## PtC\_h3po4\_140C\_Pt\_L3\_0046

| #                  | Pt-O    | Pt-Pt  | R-factor filtered |
|--------------------|---------|--------|-------------------|
| R [Å]              | 1,968*  | 2,75   | 18,61             |
| error              |         | 0,0069 |                   |
| s [Å]              | 0,181*  | 0,0858 |                   |
| error (inaccurate) |         | 0,0058 |                   |
| N                  | 0*      | 6,97   |                   |
| error              |         | 1,2    |                   |
| 2s2                | 0,0656* | 0,0147 |                   |
| error              |         | 0,002  |                   |

## PtC\_h3po4\_140C\_Pt\_L3\_0047

| #                  | Pt-O    | Pt-Pt  | R-factor filtered |
|--------------------|---------|--------|-------------------|
| R [Å]              | 1,979*  | 2,75   | 18,61             |
| error              |         | 0,0068 |                   |
| s [Å]              | 0,187*  | 0,0887 |                   |
| error (inaccurate) |         | 0,0057 |                   |
| N                  | 0*      | 7,43   |                   |
| error              |         | 1,3    |                   |
| 2s2                | 0,0702* | 0,0157 |                   |
| error              |         | 0,002  |                   |

## PtC\_h3po4\_140C\_Pt\_L3\_0048

| #                  | Pt-O    | Pt-Pt  | R-factor filtered |
|--------------------|---------|--------|-------------------|
| R [Å]              | 1,941*  | 2,749  | 18,61             |
| error              |         | 0,0068 |                   |
| s [Å]              | 0,213*  | 0,0889 |                   |
| error (inaccurate) |         | 0,0056 |                   |
| N                  | 0*      | 7,63   |                   |
| error              |         | 1,3    |                   |
| 2s2                | 0,0903* | 0,0158 |                   |
| error              |         | 0,002  |                   |

## PtC\_h3po4\_140C\_Pt\_L3\_0049

| #                  | Pt-O    | Pt-Pt  | R-factor filtered |
|--------------------|---------|--------|-------------------|
| R [Å]              | 1,976*  | 2,753  | 18,61             |
| error              |         | 0,0067 |                   |
| s [Å]              | 0,179*  | 0,0864 |                   |
| error (inaccurate) |         | 0,0056 |                   |
| N                  | 0*      | 7,2    |                   |
| error              |         | 1,3    |                   |
| 2s2                | 0,0639* | 0,0149 |                   |
| error              |         | 0,0019 |                   |

## PtC\_h3po4\_140C\_Pt\_L3\_0050

| #     | Pt-O   | Pt-Pt  | R-factor filtered |
|-------|--------|--------|-------------------|
| R [Å] | 1,988* | 2,752  | 18,61             |
| error |        | 0,0068 |                   |

|                    |         |        |
|--------------------|---------|--------|
| s [Å]              | 0,159*  | 0,0873 |
| error (inaccurate) |         | 0,0057 |
| N                  | 0*      | 7,26   |
| error              |         | 1,3    |
| 2s2                | 0,0508* | 0,0152 |
| error              |         | 0,002  |

#### PtC\_h3po4\_140C\_Pt\_L3\_0051

| #                  | Pt-O    | Pt-Pt  | R-factor filtered |
|--------------------|---------|--------|-------------------|
| R [Å]              | 1,945*  | 2,748  | 18,07             |
| error              |         | 0,0068 |                   |
| s [Å]              | 0,208*  | 0,0897 |                   |
| error (inaccurate) |         | 0,0055 |                   |
| N                  | 0*      | 7,73   |                   |
| error              |         | 1,3    |                   |
| 2s2                | 0,0865* | 0,0161 |                   |
| error              |         | 0,002  |                   |

#### PtC\_h3po4\_140C\_Pt\_L3\_0052

| #                  | Pt-O    | Pt-Pt  | R-factor filtered |
|--------------------|---------|--------|-------------------|
| R [Å]              | 1,979*  | 2,75   | 18,07             |
| error              |         | 0,0068 |                   |
| s [Å]              | 0,17*   | 0,0861 |                   |
| error (inaccurate) |         | 0,0057 |                   |
| N                  | 0*      | 7,06   |                   |
| error              |         | 1,2    |                   |
| 2s2                | 0,0577* | 0,0148 |                   |
| error              |         | 0,002  |                   |

#### PtC\_h3po4\_140C\_Pt\_L3\_0053

| #                  | Pt-O    | Pt-Pt  | R-factor filtered |
|--------------------|---------|--------|-------------------|
| R [Å]              | 1,971*  | 2,755  | 18,07             |
| error              |         | 0,0065 |                   |
| s [Å]              | 0,182*  | 0,0845 |                   |
| error (inaccurate) |         | 0,0056 |                   |
| N                  | 0*      | 7,1    |                   |
| error              |         | 1,2    |                   |
| 2s2                | 0,0666* | 0,0143 |                   |
| error              |         | 0,0019 |                   |

#### PtC\_h3po4\_140C\_Pt\_L3\_0054

| #                  | Pt-O   | Pt-Pt  | R-factor filtered |
|--------------------|--------|--------|-------------------|
| R [Å]              | 1,953* | 2,749  | 18,07             |
| error              |        | 0,007  |                   |
| s [Å]              | 0,212* | 0,0906 |                   |
| error (inaccurate) |        | 0,0057 |                   |
| N                  | 0*     | 7,78   |                   |
| error              |        | 1,4    |                   |

|       |         |        |
|-------|---------|--------|
| 2s2   | 0,0901* | 0,0164 |
| error |         | 0,002  |

#### PtC\_h3po4\_140C\_Pt\_L3\_0055

| #                  | Pt-O    | Pt-Pt  | R-factor filtered |
|--------------------|---------|--------|-------------------|
| R [Å]              | 1,972*  | 2,75   | 18,07             |
| error              |         | 0,0068 |                   |
| s [Å]              | 0,192*  | 0,0872 |                   |
| error (inaccurate) |         | 0,0057 |                   |
| N                  | 0*      | 7,19   |                   |
| error              |         | 1,3    |                   |
| 2s2                | 0,0737* | 0,0152 |                   |
| error              |         | 0,002  |                   |

#### PtC\_h3po4\_140C\_Pt\_L3\_0056

| #                  | Pt-O    | Pt-Pt  | R-factor filtered |
|--------------------|---------|--------|-------------------|
| R [Å]              | 1,979*  | 2,751  | 18,07             |
| error              |         | 0,0065 |                   |
| s [Å]              | 0,166*  | 0,0845 |                   |
| error (inaccurate) |         | 0,0055 |                   |
| N                  | 0*      | 7,09   |                   |
| error              |         | 1,2    |                   |
| 2s2                | 0,0552* | 0,0143 |                   |
| error              |         | 0,0019 |                   |

#### PtC\_h3po4\_140C\_Pt\_L3\_0057

| #                  | Pt-O    | Pt-Pt  | R-factor filtered |
|--------------------|---------|--------|-------------------|
| R [Å]              | 1,977*  | 2,753  | 18,07             |
| error              |         | 0,007  |                   |
| s [Å]              | 0,186*  | 0,0889 |                   |
| error (inaccurate) |         | 0,0057 |                   |
| N                  | 0*      | 7,38   |                   |
| error              |         | 1,3    |                   |
| 2s2                | 0,0689* | 0,0158 |                   |
| error              |         | 0,002  |                   |

#### PtC\_h3po4\_140C\_Pt\_L3\_0058

| #                  | Pt-O    | Pt-Pt  | R-factor filtered |
|--------------------|---------|--------|-------------------|
| R [Å]              | 1,95*   | 2,751  | 18,07             |
| error              |         | 0,0041 |                   |
| s [Å]              | 0,2*    | 0,0862 |                   |
| error (inaccurate) |         | 0,0056 |                   |
| N                  | 0*      | 7,16   |                   |
| error              |         | 1,2    |                   |
| 2s2                | 0,0803* | 0,0148 |                   |
| error              |         | 0,0019 |                   |

#### PtC\_h3po4\_140C\_Pt\_L3\_0059

| #                  | Pt-O   | Pt-Pt  | R-factor filtered |
|--------------------|--------|--------|-------------------|
| R [Å]              | 1,985* | 2,757  | 18,07             |
| error              |        | 0,0066 |                   |
| s [Å]              | 0,172* | 0,0829 |                   |
| error (inaccurate) |        | 0,0058 |                   |
| N                  | 0*     | 6,52   |                   |
| error              |        | 1,2    |                   |
| 2s2                | 0,059* | 0,0138 |                   |
| error              |        | 0,0019 |                   |

#### PtC\_h3po4\_140C\_Pt\_L3\_0060

| #                  | Pt-O    | Pt-Pt  | R-factor filtered |
|--------------------|---------|--------|-------------------|
| R [Å]              | 1,969*  | 2,754  | 18,07             |
| error              |         | 0,0065 |                   |
| s [Å]              | 0,194*  | 0,087  |                   |
| error (inaccurate) |         | 0,0055 |                   |
| N                  | 0*      | 7,54   |                   |
| error              |         | 1,3    |                   |
| 2s2                | 0,0751* | 0,0151 |                   |
| error              |         | 0,0019 |                   |

#### PtC\_h3po4\_140C\_Pt\_L3\_0061

| #                  | Pt-O    | Pt-Pt  | R-factor filtered |
|--------------------|---------|--------|-------------------|
| R [Å]              | 1,962*  | 2,751  | 17,52             |
| error              |         | 0,0068 |                   |
| s [Å]              | 0,205*  | 0,0902 |                   |
| error (inaccurate) |         | 0,0056 |                   |
| N                  | 0*      | 7,8    |                   |
| error              |         | 1,3    |                   |
| 2s2                | 0,0841* | 0,0163 |                   |
| error              |         | 0,002  |                   |

#### PtC\_h3po4\_140C\_Pt\_L3\_0062

| #                  | Pt-O    | Pt-Pt  | R-factor filtered |
|--------------------|---------|--------|-------------------|
| R [Å]              | 1,96*   | 2,751  | 17,52             |
| error              |         | 0,0065 |                   |
| s [Å]              | 0,191*  | 0,0853 |                   |
| error (inaccurate) |         | 0,0055 |                   |
| N                  | 0*      | 7,12   |                   |
| error              |         | 1,2    |                   |
| 2s2                | 0,0726* | 0,0146 |                   |
| error              |         | 0,0019 |                   |

#### PtC\_h3po4\_140C\_Pt\_L3\_0063

| #     | Pt-O      | Pt-Pt  | R-factor filtered |
|-------|-----------|--------|-------------------|
| R [Å] | 1,979*    | 2,751  | 17,52             |
| error |           | 0,0067 |                   |
| s [Å] | 0,000955* | 0,0881 |                   |

|                    |          |        |
|--------------------|----------|--------|
| error (inaccurate) |          | 0,0055 |
| N                  | 0*       | 7,5    |
| error              |          | 1,3    |
| 2s2                | 1,82E-6* | 0,0155 |
| error              |          | 0,0019 |

#### PtC\_h3po4\_140C\_Pt\_L3\_0064

| #                  | Pt-O    | Pt-Pt  | R-factor filtered |
|--------------------|---------|--------|-------------------|
| R [Å]              | 1,971*  | 2,75   | 17,52             |
| error              |         | 0,007  |                   |
| s [Å]              | 0,199*  | 0,0915 |                   |
| error (inaccurate) |         | 0,0057 |                   |
| N                  | 0*      | 7,89   |                   |
| error              |         | 1,4    |                   |
| 2s2                | 0,0795* | 0,0168 |                   |
| error              |         | 0,0021 |                   |

#### PtC\_h3po4\_140C\_Pt\_L3\_0065

| #                  | Pt-O    | Pt-Pt  | R-factor filtered |
|--------------------|---------|--------|-------------------|
| R [Å]              | 1,934*  | 2,747  | 17,52             |
| error              |         | 0,0067 |                   |
| s [Å]              | 0,215*  | 0,0881 |                   |
| error (inaccurate) |         | 0,0056 |                   |
| N                  | 0*      | 7,55   |                   |
| error              |         | 1,3    |                   |
| 2s2                | 0,0926* | 0,0155 |                   |
| error              |         | 0,002  |                   |

#### PtC\_h3po4\_140C\_Pt\_L3\_0066

| #                  | Pt-O    | Pt-Pt  | R-factor filtered |
|--------------------|---------|--------|-------------------|
| R [Å]              | 1,992*  | 2,754  | 17,52             |
| error              |         | 0,0066 |                   |
| s [Å]              | 0,138*  | 0,0871 |                   |
| error (inaccurate) |         | 0,0056 |                   |
| N                  | 0*      | 7,23   |                   |
| error              |         | 1,3    |                   |
| 2s2                | 0,0383* | 0,0152 |                   |
| error              |         | 0,002  |                   |

#### PtC\_h3po4\_140C\_Pt\_L3\_0067

| #                  | Pt-O    | Pt-Pt  | R-factor filtered |
|--------------------|---------|--------|-------------------|
| R [Å]              | 1,954*  | 2,753  | 17,52             |
| error              |         | 0,0067 |                   |
| s [Å]              | 0,211*  | 0,0882 |                   |
| error (inaccurate) |         | 0,0056 |                   |
| N                  | 0*      | 7,55   |                   |
| error              |         | 1,3    |                   |
| 2s2                | 0,0891* | 0,0155 |                   |

error 0,002

PtC\_h3po4\_140C\_Pt\_L3\_0068

| #                  | Pt-O    | Pt-Pt  | R-factor filtered |
|--------------------|---------|--------|-------------------|
| R [Å]              | 1,972*  | 2,753  | 17,52             |
| error              |         | 0,0066 |                   |
| s [Å]              | 0,169*  | 0,0851 |                   |
| error (inaccurate) |         | 0,0056 |                   |
| N                  | 0*      | 7,03   |                   |
| error              |         | 1,2    |                   |
| 2s2                | 0,0569* | 0,0145 |                   |
| error              |         | 0,0019 |                   |

PtC\_h3po4\_140C\_Pt\_L3\_0069

| #                  | Pt-O    | Pt-Pt  | R-factor filtered |
|--------------------|---------|--------|-------------------|
| R [Å]              | 1,97*   | 2,756  | 17,52             |
| error              |         | 0,0066 |                   |
| s [Å]              | 0,141*  | 0,0859 |                   |
| error (inaccurate) |         | 0,0056 |                   |
| N                  | 0*      | 7,09   |                   |
| error              |         | 1,2    |                   |
| 2s2                | 0,0396* | 0,0148 |                   |
| error              |         | 0,0019 |                   |

PtC\_h3po4\_140C\_Pt\_L3\_0070

| #                  | Pt-O    | Pt-Pt  | R-factor filtered |
|--------------------|---------|--------|-------------------|
| R [Å]              | 1,946*  | 2,75   | 17,52             |
| error              |         | 0,0069 |                   |
| s [Å]              | 0,216*  | 0,0928 |                   |
| error (inaccurate) |         | 0,0055 |                   |
| N                  | 0*      | 8,22   |                   |
| error              |         | 1,4    |                   |
| 2s2                | 0,0933* | 0,0172 |                   |
| error              |         | 0,002  |                   |

PtC\_h3po4\_140C\_Pt\_L3\_0071

| #                  | Pt-O    | Pt-Pt  | R-factor filtered |
|--------------------|---------|--------|-------------------|
| R [Å]              | 1,945*  | 2,746  | 19,16             |
| error              |         | 0,0067 |                   |
| s [Å]              | 0,203*  | 0,0855 |                   |
| error (inaccurate) |         | 0,0056 |                   |
| N                  | 0*      | 6,99   |                   |
| error              |         | 1,2    |                   |
| 2s2                | 0,0827* | 0,0146 |                   |
| error              |         | 0,0019 |                   |

PtC\_h3po4\_140C\_Pt\_L3\_0072

| # | Pt-O | Pt-Pt | R-factor filtered |
|---|------|-------|-------------------|
|---|------|-------|-------------------|

|                    |         |        |       |
|--------------------|---------|--------|-------|
| R [Å]              | 1,983*  | 2,751  | 19,16 |
| error              |         | 0,0067 |       |
| s [Å]              | 0,16*   | 0,0868 |       |
| error (inaccurate) |         | 0,0056 |       |
| N                  | 0*      | 7,19   |       |
| error              |         | 1,3    |       |
| 2s2                | 0,0511* | 0,0151 |       |
| error              |         | 0,002  |       |

#### PtC\_h3po4\_140C\_Pt\_L3\_0073

| #                  | Pt-O     | Pt-Pt  | R-factor filtered |
|--------------------|----------|--------|-------------------|
| R [Å]              | 2,006*   | 2,751  | 19,16             |
| error              |          | 0,0069 |                   |
| s [Å]              | 0,00282* | 0,0921 |                   |
| error (inaccurate) |          | 0,0056 |                   |
| N                  | 0*       | 8,05   |                   |
| error              |          | 1,4    |                   |
| 2s2                | 1,59E-5* | 0,017  |                   |
| error              |          | 0,0021 |                   |

#### PtC\_h3po4\_140C\_Pt\_L3\_0074

| #                  | Pt-O    | Pt-Pt  | R-factor filtered |
|--------------------|---------|--------|-------------------|
| R [Å]              | 1,933*  | 2,743  | 19,16             |
| error              |         | 0,0066 |                   |
| s [Å]              | 0,212*  | 0,0863 |                   |
| error (inaccurate) |         | 0,0055 |                   |
| N                  | 0*      | 7,3    |                   |
| error              |         | 1,2    |                   |
| 2s2                | 0,0898* | 0,0149 |                   |
| error              |         | 0,0019 |                   |

#### PtC\_h3po4\_140C\_Pt\_L3\_0075

| #                  | Pt-O    | Pt-Pt  | R-factor filtered |
|--------------------|---------|--------|-------------------|
| R [Å]              | 1,978*  | 2,757  | 19,16             |
| error              |         | 0,0069 |                   |
| s [Å]              | 0,174*  | 0,0893 |                   |
| error (inaccurate) |         | 0,0057 |                   |
| N                  | 0*      | 7,47   |                   |
| error              |         | 1,3    |                   |
| 2s2                | 0,0604* | 0,016  |                   |
| error              |         | 0,002  |                   |

#### PtC\_h3po4\_140C\_Pt\_L3\_0076

| #                  | Pt-O    | Pt-Pt  | R-factor filtered |
|--------------------|---------|--------|-------------------|
| R [Å]              | 1,993*  | 2,75   | 19,16             |
| error              |         | 0,0067 |                   |
| s [Å]              | 0,0843* | 0,0907 |                   |
| error (inaccurate) |         | 0,0055 |                   |

|       |         |        |
|-------|---------|--------|
| N     | 0*      | 7,89   |
| error |         | 1,3    |
| 2s2   | 0,0142* | 0,0165 |
| error |         | 0,002  |

#### PtC\_h3po4\_140C\_Pt\_L3\_0077

| #                  | Pt-O    | Pt-Pt  | R-factor filtered |
|--------------------|---------|--------|-------------------|
| R [Å]              | 1,948*  | 2,747  | 19,16             |
| error              |         | 0,0066 |                   |
| s [Å]              | 0,199*  | 0,0881 |                   |
| error (inaccurate) |         | 0,0055 |                   |
| N                  | 0*      | 7,63   |                   |
| error              |         | 1,3    |                   |
| 2s2                | 0,0791* | 0,0155 |                   |
| error              |         | 0,0019 |                   |

#### PtC\_h3po4\_140C\_Pt\_L3\_0078

| #                  | Pt-O    | Pt-Pt  | R-factor filtered |
|--------------------|---------|--------|-------------------|
| R [Å]              | 1,976*  | 2,757  | 19,16             |
| error              |         | 0,0063 |                   |
| s [Å]              | 0,129*  | 0,0815 |                   |
| error (inaccurate) |         | 0,0056 |                   |
| N                  | 0*      | 6,61   |                   |
| error              |         | 1,1    |                   |
| 2s2                | 0,0332* | 0,0133 |                   |
| error              |         | 0,0018 |                   |

#### PtC\_h3po4\_140C\_Pt\_L3\_0079

| #                  | Pt-O    | Pt-Pt  | R-factor filtered |
|--------------------|---------|--------|-------------------|
| R [Å]              | 1,991*  | 2,752  | 19,16             |
| error              |         | 0,0067 |                   |
| s [Å]              | 0,132*  | 0,0888 |                   |
| error (inaccurate) |         | 0,0056 |                   |
| N                  | 0*      | 7,56   |                   |
| error              |         | 1,3    |                   |
| 2s2                | 0,0346* | 0,0158 |                   |
| error              |         | 0,002  |                   |



| Sample                      | Time (min) |
|-----------------------------|------------|
| PtC_dry_Pt_L3               | 0          |
| PtC_dry_160C_Pt_L3          | 0          |
| PtC_H3PO4_160C_Pt_L3_0000   | 3          |
| PtC_H3PO4_160C_Pt_L3_0001   | 6          |
| PtC_H3PO4_160C_1_Pt_L3_0000 | 9          |
| PtC_H3PO4_160C_1_Pt_L3_0001 | 12         |
| PtC_H3PO4_160C_1_Pt_L3_0002 | 15         |
| PtC_H3PO4_160C_1_Pt_L3_0003 | 18         |
| PtC_H3PO4_160C_1_Pt_L3_0004 | 21         |
| PtC_H3PO4_160C_1_Pt_L3_0005 | 24         |
| PtC_H3PO4_160C_1_Pt_L3_0006 | 27         |
| PtC_H3PO4_160C_1_Pt_L3_0007 | 30         |
| PtC_H3PO4_160C_1_Pt_L3_0008 | 33         |
| PtC_H3PO4_160C_1_Pt_L3_0009 | 36         |
| PtC_H3PO4_160C_1_Pt_L3_0010 | 39         |
| PtC_H3PO4_160C_1_Pt_L3_0011 | 42         |
| PtC_H3PO4_160C_1_Pt_L3_0012 | 45         |
| PtC_H3PO4_160C_1_Pt_L3_0013 | 48         |
| PtC_H3PO4_160C_1_Pt_L3_0014 | 51         |
| PtC_H3PO4_160C_1_Pt_L3_0015 | 54         |
| PtC_H3PO4_160C_1_Pt_L3_0016 | 57         |
| PtC_H3PO4_160C_1_Pt_L3_0017 | 60         |
| PtC_H3PO4_160C_1_Pt_L3_0018 | 63         |
| PtC_H3PO4_160C_1_Pt_L3_0019 | 66         |
| PtC_H3PO4_160C_1_Pt_L3_0020 | 69         |
| PtC_H3PO4_160C_1_Pt_L3_0021 | 72         |
| PtC_H3PO4_160C_1_Pt_L3_0022 | 75         |
| PtC_H3PO4_160C_1_Pt_L3_0023 | 78         |
| PtC_H3PO4_160C_1_Pt_L3_0024 | 81         |
| PtC_H3PO4_160C_1_Pt_L3_0025 | 84         |
| PtC_H3PO4_160C_1_Pt_L3_0026 | 87         |
| PtC_H3PO4_160C_1_Pt_L3_0027 | 90         |
| PtC_H3PO4_160C_1_Pt_L3_0028 | 93         |
| PtC_H3PO4_160C_1_Pt_L3_0029 | 96         |
| PtC_H3PO4_160C_1_Pt_L3_0030 | 99         |
| PtC_H3PO4_160C_1_Pt_L3_0031 | 102        |
| PtC_H3PO4_160C_1_Pt_L3_0032 | 105        |
| PtC_H3PO4_160C_1_Pt_L3_0033 | 108        |
| PtC_H3PO4_160C_1_Pt_L3_0034 | 111        |
| PtC_H3PO4_160C_1_Pt_L3_0035 | 114        |
| PtC_H3PO4_160C_1_Pt_L3_0036 | 117        |
| PtC_H3PO4_160C_1_Pt_L3_0037 | 120        |
| PtC_H3PO4_160C_1_Pt_L3_0038 | 123        |
| PtC_H3PO4_160C_1_Pt_L3_0039 | 126        |
| PtC_H3PO4_160C_1_Pt_L3_0040 | 129        |
| PtC_H3PO4_160C_1_Pt_L3_0041 | 132        |

|                             |     |
|-----------------------------|-----|
| PtC_H3PO4_160C_1_Pt_L3_0042 | 135 |
| PtC_H3PO4_160C_1_Pt_L3_0043 | 138 |
| PtC_H3PO4_160C_1_Pt_L3_0044 | 141 |
| PtC_H3PO4_160C_1_Pt_L3_0045 | 144 |
| PtC_H3PO4_160C_1_Pt_L3_0046 | 147 |
| PtC_H3PO4_160C_1_Pt_L3_0047 | 150 |
| PtC_H3PO4_160C_1_Pt_L3_0048 | 153 |
| PtC_H3PO4_160C_1_Pt_L3_0049 | 156 |
| PtC_H3PO4_160C_1_Pt_L3_0050 | 159 |
| PtC_H3PO4_160C_1_Pt_L3_0051 | 162 |
| PtC_H3PO4_160C_1_Pt_L3_0052 | 165 |
| PtC_H3PO4_160C_1_Pt_L3_0053 | 168 |
| PtC_H3PO4_160C_1_Pt_L3_0054 | 171 |
| PtC_H3PO4_160C_1_Pt_L3_0055 | 174 |
| PtC_H3PO4_160C_1_Pt_L3_0056 | 177 |
| PtC_H3PO4_160C_1_Pt_L3_0057 | 180 |
| PtC_H3PO4_160C_1_Pt_L3_0058 | 183 |
| PtC_H3PO4_160C_1_Pt_L3_0059 | 186 |
| PtC_H3PO4_160C_1_Pt_L3_0060 | 189 |
| PtC_H3PO4_160C_1_Pt_L3_0061 | 192 |
| PtC_H3PO4_160C_1_Pt_L3_0062 | 195 |
| PtC_H3PO4_160C_1_Pt_L3_0063 | 198 |
| PtC_H3PO4_160C_1_Pt_L3_0064 | 201 |
| PtC_H3PO4_160C_1_Pt_L3_0065 | 204 |
| PtC_H3PO4_160C_1_Pt_L3_0066 | 207 |
| PtC_H3PO4_160C_1_Pt_L3_0067 | 210 |
| PtC_H3PO4_160C_1_Pt_L3_0068 | 213 |
| PtC_H3PO4_160C_1_Pt_L3_0069 | 216 |
| PtC_H3PO4_160C_1_Pt_L3_0070 | 219 |
| PtC_H3PO4_160C_1_Pt_L3_0071 | 222 |
| PtC_H3PO4_160C_1_Pt_L3_0072 | 225 |
| PtC_H3PO4_160C_1_Pt_L3_0073 | 228 |
| PtC_H3PO4_160C_1_Pt_L3_0074 | 231 |
| PtC_H3PO4_160C_1_Pt_L3_0075 | 234 |
| PtC_H3PO4_160C_1_Pt_L3_0076 | 237 |
| PtC_H3PO4_160C_1_Pt_L3_0077 | 240 |

PtC\_dry\_Pt\_L3

S02 = 0,92457225

| #                  | Pt-O  | Pt-Pt  | R-factor filtered |
|--------------------|-------|--------|-------------------|
| R [Å]              | 2,007 | 2,751  | 18,5              |
| error              | 0,021 | 0,0078 |                   |
| s [Å]              | 0,087 | 0,0829 |                   |
| error (inaccurate) | 0,024 | 0,0091 |                   |
| N                  | 1,75  | 4,29   |                   |
| error              | 0,54  | 1,2    |                   |
| 2s2                | 0,015 | 0,014  |                   |
| error              | 0,008 | 0,003  |                   |

PtC\_dry\_160C\_Pt\_L3

| #                  | Pt-O   | Pt-Pt  | R-factor filtered |
|--------------------|--------|--------|-------------------|
| R [Å]              | 2,001  | 2,744  | 18,5              |
| error              | 0,026  | 0,01   |                   |
| s [Å]              | 0,0961 | 0,0936 |                   |
| error (inaccurate) | 0,029  | 0,01   |                   |
| N                  | 1,64   | 4,61   |                   |
| error              | 0,6    | 1,4    |                   |
| 2s2                | 0,0185 | 0,018  |                   |
| error              | 0,011  | 0,0038 |                   |

PtC\_H3PO4\_160C\_Pt\_L3\_0000

| #                  | Pt-O    | Pt-Pt  | R-factor filtered |
|--------------------|---------|--------|-------------------|
| R [Å]              | 1,966*  | 2,747  | 18,5              |
| error              |         | 0,0076 |                   |
| s [Å]              | 0,188*  | 0,0903 |                   |
| error (inaccurate) |         | 0,0062 |                   |
| N                  | 0*      | 6,9    |                   |
| error              |         | 1,3    |                   |
| 2s2                | 0,0704* | 0,0163 |                   |
| error              |         | 0,0022 |                   |

PtC\_H3PO4\_160C\_Pt\_L3\_0001

| #                  | Pt-O   | Pt-Pt    | R-factor filtered |
|--------------------|--------|----------|-------------------|
| R [Å]              | 1,945* | 2,746    | 18,5              |
| error              |        | 0,0074   |                   |
| s [Å]              | 0,214* | 0,0907   |                   |
| error (inaccurate) |        | 0,006    |                   |
| N                  | 0*     | 7,16     |                   |
| error              |        | 1,3      |                   |
| 2s2                | 0,092* | 1,64E-02 |                   |
| error              |        | 0,0022   |                   |

PtC\_H3PO4\_160C\_1\_Pt\_L3\_0000

| #     | Pt-O   | Pt-Pt  | R-factor filtered |
|-------|--------|--------|-------------------|
| R [Å] | 1,957* | 2,75   | 18,5              |
| error |        | 0,0073 |                   |

|                    |         |        |
|--------------------|---------|--------|
| s [Å]              | 0,204*  | 0,0911 |
| error (inaccurate) |         | 0,006  |
| N                  | 0*      | 7,26   |
| error              |         | 1,3    |
| 2s2                | 0,0836* | 0,0166 |
| error              |         | 0,0022 |

#### PtC\_H3PO4\_160C\_1\_Pt\_L3\_0001

| #                  | Pt-O    | Pt-Pt  | R-factor filtered |
|--------------------|---------|--------|-------------------|
| R [Å]              | 1,953*  | 2,748  | 18,5              |
| error              |         | 0,0072 |                   |
| s [Å]              | 0,196*  | 0,0875 |                   |
| error (inaccurate) |         | 0,006  |                   |
| N                  | 0*      | 6,89   |                   |
| error              |         | 1,3    |                   |
| 2s2                | 0,0769* | 0,0153 |                   |
| error              |         | 0,0021 |                   |

#### PtC\_H3PO4\_160C\_1\_Pt\_L3\_0002

| #                  | Pt-O    | Pt-Pt  | R-factor filtered |
|--------------------|---------|--------|-------------------|
| R [Å]              | 1,974*  | 2,755  | 18,5              |
| error              |         | 0,0071 |                   |
| s [Å]              | 0,189*  | 0,0874 |                   |
| error (inaccurate) |         | 0,0061 |                   |
| N                  | 0*      | 6,81   |                   |
| error              |         | 1,3    |                   |
| 2s2                | 0,0712* | 0,0153 |                   |
| error              |         | 0,0021 |                   |

#### PtC\_H3PO4\_160C\_1\_Pt\_L3\_0003

| #                  | Pt-O   | Pt-Pt  | R-factor filtered |
|--------------------|--------|--------|-------------------|
| R [Å]              | 1,953* | 2,748  | 18,5              |
| error              |        | 0,0042 |                   |
| s [Å]              | 0,197* | 0,085  |                   |
| error (inaccurate) |        | 0,0059 |                   |
| N                  | 0*     | 6,72   |                   |
| error              |        | 1,2    |                   |
| 2s2                | 0,078* | 0,0145 |                   |
| error              |        | 0,002  |                   |

#### PtC\_H3PO4\_160C\_1\_Pt\_L3\_0004

| #                  | Pt-O   | Pt-Pt  | R-factor filtered |
|--------------------|--------|--------|-------------------|
| R [Å]              | 1,948* | 2,752  | 18,5              |
| error              |        | 0,0069 |                   |
| s [Å]              | 0,209* | 0,089  |                   |
| error (inaccurate) |        | 0,0058 |                   |
| N                  | 0*     | 7,3    |                   |
| error              |        | 1,3    |                   |

|       |        |        |
|-------|--------|--------|
| 2s2   | 0,087* | 0,0158 |
| error |        | 0,0021 |

#### PtC\_H3PO4\_160C\_1\_Pt\_L3\_0005

| #                  | Pt-O    | Pt-Pt  | R-factor filtered |
|--------------------|---------|--------|-------------------|
| R [Å]              | 1,934*  | 2,746  | 18,5              |
| error              |         | 0,007  |                   |
| s [Å]              | 0,223*  | 0,0904 |                   |
| error (inaccurate) |         | 0,0058 |                   |
| N                  | 0*      | 7,53   |                   |
| error              |         | 1,3    |                   |
| 2s2                | 0,0996* | 0,0163 |                   |
| error              |         | 0,0021 |                   |

#### PtC\_H3PO4\_160C\_1\_Pt\_L3\_0006

| #                  | Pt-O    | Pt-Pt  | R-factor filtered |
|--------------------|---------|--------|-------------------|
| R [Å]              | 1,983*  | 2,754  | 18,5              |
| error              |         | 0,007  |                   |
| s [Å]              | 0,182*  | 0,0882 |                   |
| error (inaccurate) |         | 0,0059 |                   |
| N                  | 0*      | 7,08   |                   |
| error              |         | 1,3    |                   |
| 2s2                | 0,0662* | 0,0156 |                   |
| error              |         | 0,0021 |                   |

#### PtC\_H3PO4\_160C\_1\_Pt\_L3\_0007

| #                  | Pt-O   | Pt-Pt  | R-factor filtered |
|--------------------|--------|--------|-------------------|
| R [Å]              | 1,957* | 2,753  | 18,5              |
| error              |        | 0,0069 |                   |
| s [Å]              | 0,192* | 0,0861 |                   |
| error (inaccurate) |        | 0,0059 |                   |
| N                  | 0*     | 6,84   |                   |
| error              |        | 1,2    |                   |
| 2s2                | 0,074* | 0,0148 |                   |
| error              |        | 0,002  |                   |

#### PtC\_H3PO4\_160C\_1\_Pt\_L3\_0008

| #                  | Pt-O    | Pt-Pt  | R-factor filtered |
|--------------------|---------|--------|-------------------|
| R [Å]              | 1,974*  | 2,757  | 18,5              |
| error              |         | 0,0069 |                   |
| s [Å]              | 0,187*  | 0,0874 |                   |
| error (inaccurate) |         | 0,0059 |                   |
| N                  | 0*      | 7      |                   |
| error              |         | 1,3    |                   |
| 2s2                | 0,0699* | 0,0153 |                   |
| error              |         | 0,0021 |                   |

#### PtC\_H3PO4\_160C\_1\_Pt\_L3\_0009

| #                  | Pt-O   | Pt-Pt  | R-factor filtered |
|--------------------|--------|--------|-------------------|
| R [Å]              | 1,945* | 2,749  | 15,85             |
| error              |        | 0,007  |                   |
| s [Å]              | 0,214* | 0,0893 |                   |
| error (inaccurate) |        | 0,0059 |                   |
| N                  | 0*     | 7,34   |                   |
| error              |        | 1,3    |                   |
| 2s2                | 0,092* | 0,0159 |                   |
| error              |        | 0,0021 |                   |

#### PtC\_H3PO4\_160C\_1\_Pt\_L3\_0010

| #                  | Pt-O    | Pt-Pt  | R-factor filtered |
|--------------------|---------|--------|-------------------|
| R [Å]              | 1,957*  | 2,75   | 15,85             |
| error              |         | 0,0071 |                   |
| s [Å]              | 0,204*  | 0,0882 |                   |
| error (inaccurate) |         | 0,0059 |                   |
| N                  | 0*      | 7,08   |                   |
| error              |         | 1,3    |                   |
| 2s2                | 0,0836* | 0,0156 |                   |
| error              |         | 0,0021 |                   |

#### PtC\_H3PO4\_160C\_1\_Pt\_L3\_0011

| #                  | Pt-O    | Pt-Pt  | R-factor filtered |
|--------------------|---------|--------|-------------------|
| R [Å]              | 1,953*  | 2,75   | 15,85             |
| error              |         | 0,0072 |                   |
| s [Å]              | 0,196*  | 0,0894 |                   |
| error (inaccurate) |         | 0,006  |                   |
| N                  | 0*      | 7,16   |                   |
| error              |         | 1,3    |                   |
| 2s2                | 0,0769* | 0,016  |                   |
| error              |         | 0,0021 |                   |

#### PtC\_H3PO4\_160C\_1\_Pt\_L3\_0012

| #                  | Pt-O    | Pt-Pt  | R-factor filtered |
|--------------------|---------|--------|-------------------|
| R [Å]              | 1,974*  | 2,749  | 15,85             |
| error              |         | 0,0068 |                   |
| s [Å]              | 0,189*  | 0,0868 |                   |
| error (inaccurate) |         | 0,0057 |                   |
| N                  | 0*      | 6,99   |                   |
| error              |         | 1,2    |                   |
| 2s2                | 0,0712* | 0,0151 |                   |
| error              |         | 0,002  |                   |

#### PtC\_H3PO4\_160C\_1\_Pt\_L3\_0013

| #     | Pt-O   | Pt-Pt  | R-factor filtered |
|-------|--------|--------|-------------------|
| R [Å] | 1,953* | 2,752  | 15,85             |
| error |        | 0,0069 |                   |
| s [Å] | 0,197* | 0,0878 |                   |

|                    |        |        |
|--------------------|--------|--------|
| error (inaccurate) |        | 0,0058 |
| N                  | 0*     | 7,15   |
| error              |        | 1,3    |
| 2s2                | 0,078* | 0,0154 |
| error              |        | 0,002  |

#### PtC\_H3PO4\_160C\_1\_Pt\_L3\_0014

| #                  | Pt-O   | Pt-Pt  | R-factor filtered |
|--------------------|--------|--------|-------------------|
| R [Å]              | 1,948* | 2,755  | 15,85             |
| error              |        | 0,0066 |                   |
| s [Å]              | 0,209* | 0,0873 |                   |
| error (inaccurate) |        | 0,0056 |                   |
| N                  | 0*     | 7,24   |                   |
| error              |        | 1,3    |                   |
| 2s2                | 0,087* | 0,0153 |                   |
| error              |        | 0,002  |                   |

#### PtC\_H3PO4\_160C\_1\_Pt\_L3\_0015

| #                  | Pt-O    | Pt-Pt  | R-factor filtered |
|--------------------|---------|--------|-------------------|
| R [Å]              | 1,934*  | 2,747  | 15,85             |
| error              |         | 0,0065 |                   |
| s [Å]              | 0,223*  | 0,0858 |                   |
| error (inaccurate) |         | 0,0055 |                   |
| N                  | 0*      | 7,15   |                   |
| error              |         | 1,2    |                   |
| 2s2                | 0,0996* | 0,0147 |                   |
| error              |         | 0,0019 |                   |

#### PtC\_H3PO4\_160C\_1\_Pt\_L3\_0016

| #                  | Pt-O    | Pt-Pt  | R-factor filtered |
|--------------------|---------|--------|-------------------|
| R [Å]              | 1,983*  | 2,748  | 15,85             |
| error              |         | 0,0065 |                   |
| s [Å]              | 0,182*  | 0,0866 |                   |
| error (inaccurate) |         | 0,0055 |                   |
| N                  | 0*      | 7,33   |                   |
| error              |         | 1,2    |                   |
| 2s2                | 0,0662* | 0,015  |                   |
| error              |         | 0,0019 |                   |

#### PtC\_H3PO4\_160C\_1\_Pt\_L3\_0017

| #                  | Pt-O   | Pt-Pt  | R-factor filtered |
|--------------------|--------|--------|-------------------|
| R [Å]              | 1,957* | 2,753  | 15,85             |
| error              |        | 0,0064 |                   |
| s [Å]              | 0,192* | 0,0886 |                   |
| error (inaccurate) |        | 0,0054 |                   |
| N                  | 0*     | 7,68   |                   |
| error              |        | 1,3    |                   |
| 2s2                | 0,074* | 0,0157 |                   |

error 0,0019

PtC\_H3PO4\_160C\_1\_Pt\_L3\_0018

| #                  | Pt-O    | Pt-Pt  | R-factor filtered |
|--------------------|---------|--------|-------------------|
| R [Å]              | 1,974*  | 2,751  | 15,85             |
| error              |         | 0,0066 |                   |
| s [Å]              | 0,187*  | 0,0866 |                   |
| error (inaccurate) |         | 0,0057 |                   |
| N                  | 0*      | 7,17   |                   |
| error              |         | 1,2    |                   |
| 2s2                | 0,0699* | 0,015  |                   |
| error              |         | 0,002  |                   |

PtC\_H3PO4\_160C\_1\_Pt\_L3\_0019

| #                  | Pt-O    | Pt-Pt  | R-factor filtered |
|--------------------|---------|--------|-------------------|
| R [Å]              | 1,972*  | 2,752  | 16,12             |
| error              |         | 0,0066 |                   |
| s [Å]              | 0,177*  | 0,0855 |                   |
| error (inaccurate) |         | 0,0057 |                   |
| N                  | 0*      | 7,05   |                   |
| error              |         | 1,2    |                   |
| 2s2                | 0,0627* | 0,0146 |                   |
| error              |         | 0,0019 |                   |

PtC\_H3PO4\_160C\_1\_Pt\_L3\_0020

| #                  | Pt-O    | Pt-Pt  | R-factor filtered |
|--------------------|---------|--------|-------------------|
| R [Å]              | 1,945*  | 2,752  | 16,12             |
| error              |         | 0,0066 |                   |
| s [Å]              | 0,201*  | 0,0866 |                   |
| error (inaccurate) |         | 0,0057 |                   |
| N                  | 0*      | 7,09   |                   |
| error              |         | 1,2    |                   |
| 2s2                | 0,0805* | 0,015  |                   |
| error              |         | 0,002  |                   |

PtC\_H3PO4\_160C\_1\_Pt\_L3\_0021

| #                  | Pt-O    | Pt-Pt  | R-factor filtered |
|--------------------|---------|--------|-------------------|
| R [Å]              | 1,944*  | 2,752  | 16,12             |
| error              |         | 0,0043 |                   |
| s [Å]              | 0,208*  | 0,0875 |                   |
| error (inaccurate) |         | 0,0057 |                   |
| N                  | 0*      | 7,16   |                   |
| error              |         | 1,3    |                   |
| 2s2                | 0,0865* | 0,0153 |                   |
| error              |         | 0,002  |                   |

PtC\_H3PO4\_160C\_1\_Pt\_L3\_0022

| # | Pt-O | Pt-Pt | R-factor filtered |
|---|------|-------|-------------------|
|---|------|-------|-------------------|



|                    |         |        |       |
|--------------------|---------|--------|-------|
| R [Å]              | 1,931*  | 2,75   | 16,12 |
| error              |         | 0,0066 |       |
| s [Å]              | 0,222*  | 0,0876 |       |
| error (inaccurate) |         | 0,0056 |       |
| N                  | 0*      | 7,37   |       |
| error              |         | 1,3    |       |
| 2s2                | 0,0982* | 0,0154 |       |
| error              |         | 0,0019 |       |

#### PtC\_H3PO4\_160C\_1\_Pt\_L3\_0023

| #                  | Pt-O    | Pt-Pt  | R-factor filtered |
|--------------------|---------|--------|-------------------|
| R [Å]              | 1,922*  | 2,747  | 16,12             |
| error              |         | 0,0066 |                   |
| s [Å]              | 0,212*  | 0,089  |                   |
| error (inaccurate) |         | 0,0055 |                   |
| N                  | 0*      | 7,73   |                   |
| error              |         | 1,3    |                   |
| 2s2                | 0,0898* | 0,0158 |                   |
| error              |         | 0,002  |                   |

#### PtC\_H3PO4\_160C\_1\_Pt\_L3\_0024

| #                  | Pt-O    | Pt-Pt  | R-factor filtered |
|--------------------|---------|--------|-------------------|
| R [Å]              | 1,964*  | 2,754  | 16,12             |
| error              |         | 0,0066 |                   |
| s [Å]              | 0,194*  | 0,0862 |                   |
| error (inaccurate) |         | 0,0057 |                   |
| N                  | 0*      | 7,04   |                   |
| error              |         | 1,2    |                   |
| 2s2                | 0,0753* | 0,0149 |                   |
| error              |         | 0,002  |                   |

#### PtC\_H3PO4\_160C\_1\_Pt\_L3\_0025

| #                  | Pt-O    | Pt-Pt  | R-factor filtered |
|--------------------|---------|--------|-------------------|
| R [Å]              | 1,956*  | 2,752  | 16,12             |
| error              |         | 0,0066 |                   |
| s [Å]              | 0,203*  | 0,0878 |                   |
| error (inaccurate) |         | 0,0056 |                   |
| N                  | 0*      | 7,46   |                   |
| error              |         | 1,3    |                   |
| 2s2                | 0,0822* | 0,0154 |                   |
| error              |         | 0,002  |                   |

#### PtC\_H3PO4\_160C\_1\_Pt\_L3\_0026

| #                  | Pt-O   | Pt-Pt  | R-factor filtered |
|--------------------|--------|--------|-------------------|
| R [Å]              | 1,92*  | 2,746  | 16,12             |
| error              |        | 0,0067 |                   |
| s [Å]              | 0,217* | 0,0882 |                   |
| error (inaccurate) |        | 0,0056 |                   |

|       |        |        |
|-------|--------|--------|
| N     | 0*     | 7,45   |
| error |        | 1,3    |
| 2s2   | 0,094* | 0,0156 |
| error |        | 0,002  |

#### PtC\_H3PO4\_160C\_1\_Pt\_L3\_0027

| #                  | Pt-O    | Pt-Pt  | R-factor filtered |
|--------------------|---------|--------|-------------------|
| R [Å]              | 1,944*  | 2,751  | 16,12             |
| error              |         | 0,0065 |                   |
| s [Å]              | 0,203*  | 0,0886 |                   |
| error (inaccurate) |         | 0,0055 |                   |
| N                  | 0*      | 7,59   |                   |
| error              |         | 1,3    |                   |
| 2s2                | 0,0824* | 0,0157 |                   |
| error              |         | 0,0019 |                   |

#### PtC\_H3PO4\_160C\_1\_Pt\_L3\_0028

| #                  | Pt-O    | Pt-Pt  | R-factor filtered |
|--------------------|---------|--------|-------------------|
| R [Å]              | 1,929*  | 2,751  | 16,12             |
| error              |         | 0,0065 |                   |
| s [Å]              | 0,223*  | 0,0886 |                   |
| error (inaccurate) |         | 0,0055 |                   |
| N                  | 0*      | 7,63   |                   |
| error              |         | 1,3    |                   |
| 2s2                | 0,0995* | 0,0157 |                   |
| error              |         | 0,0019 |                   |

#### PtC\_H3PO4\_160C\_1\_Pt\_L3\_0029

| #                  | Pt-O   | Pt-Pt  | R-factor filtered |
|--------------------|--------|--------|-------------------|
| R [Å]              | 1,921* | 2,748  | 17,32             |
| error              |        | 0,0068 |                   |
| s [Å]              | 0,226* | 0,0902 |                   |
| error (inaccurate) |        | 0,0056 |                   |
| N                  | 0*     | 7,76   |                   |
| error              |        | 1,3    |                   |
| 2s2                | 0,102* | 0,0163 |                   |
| error              |        | 0,002  |                   |

#### PtC\_H3PO4\_160C\_1\_Pt\_L3\_0030

| #                  | Pt-O    | Pt-Pt  | R-factor filtered |
|--------------------|---------|--------|-------------------|
| R [Å]              | 1,946*  | 2,751  | 17,32             |
| error              |         | 0,0068 |                   |
| s [Å]              | 0,2*    | 0,0891 |                   |
| error (inaccurate) |         | 0,0057 |                   |
| N                  | 0*      | 7,48   |                   |
| error              |         | 1,3    |                   |
| 2s2                | 0,0796* | 0,0159 |                   |
| error              |         | 0,002  |                   |

## PtC\_H3PO4\_160C\_1\_Pt\_L3\_0031

| #                  | Pt-O    | Pt-Pt  | R-factor filtered |
|--------------------|---------|--------|-------------------|
| R [Å]              | 1,98*   | 2,755  | 17,32             |
| error              |         | 0,0065 |                   |
| s [Å]              | 0,177*  | 0,0882 |                   |
| error (inaccurate) |         | 0,0055 |                   |
| N                  | 0*      | 7,55   |                   |
| error              |         | 1,3    |                   |
| 2s2                | 0,0625* | 0,0156 |                   |
| error              |         | 0,0019 |                   |

## PtC\_H3PO4\_160C\_1\_Pt\_L3\_0032

| #                  | Pt-O    | Pt-Pt  | R-factor filtered |
|--------------------|---------|--------|-------------------|
| R [Å]              | 1,935*  | 2,752  | 17,32             |
| error              |         | 0,0065 |                   |
| s [Å]              | 0,215*  | 0,0871 |                   |
| error (inaccurate) |         | 0,0056 |                   |
| N                  | 0*      | 7,31   |                   |
| error              |         | 1,3    |                   |
| 2s2                | 0,0922* | 0,0152 |                   |
| error              |         | 0,0019 |                   |

## PtC\_H3PO4\_160C\_1\_Pt\_L3\_0033

| #                  | Pt-O   | Pt-Pt  | R-factor filtered |
|--------------------|--------|--------|-------------------|
| R [Å]              | 1,952* | 2,754  | 17,32             |
| error              |        | 0,0066 |                   |
| s [Å]              | 0,199* | 0,0867 |                   |
| error (inaccurate) |        | 0,0056 |                   |
| N                  | 0*     | 7,17   |                   |
| error              |        | 1,2    |                   |
| 2s2                | 0,079* | 0,015  |                   |
| error              |        | 0,002  |                   |

## PtC\_H3PO4\_160C\_1\_Pt\_L3\_0034

| #                  | Pt-O   | Pt-Pt  | R-factor filtered |
|--------------------|--------|--------|-------------------|
| R [Å]              | 1,956* | 2,751  | 17,32             |
| error              |        | 0,0065 |                   |
| s [Å]              | 0,194* | 0,0853 |                   |
| error (inaccurate) |        | 0,0056 |                   |
| N                  | 0*     | 7,1    |                   |
| error              |        | 1,2    |                   |
| 2s2                | 0,075* | 0,0145 |                   |
| error              |        | 0,0019 |                   |

## PtC\_H3PO4\_160C\_1\_Pt\_L3\_0035

| #     | Pt-O   | Pt-Pt | R-factor filtered |
|-------|--------|-------|-------------------|
| R [Å] | 1,959* | 2,751 | 17,32             |

|                    |         |        |
|--------------------|---------|--------|
| error              |         | 0,0068 |
| s [Å]              | 0,195*  | 0,0883 |
| error (inaccurate) |         | 0,0057 |
| N                  | 0*      | 7,32   |
| error              |         | 1,3    |
| 2s2                | 0,0759* | 0,0156 |
| error              |         | 0,002  |

#### PtC\_H3PO4\_160C\_1\_Pt\_L3\_0036

| #                  | Pt-O    | Pt-Pt  | R-factor filtered |
|--------------------|---------|--------|-------------------|
| R [Å]              | 1,944*  | 2,75   | 17,32             |
| error              |         | 0,0064 |                   |
| s [Å]              | 0,211*  | 0,0867 |                   |
| error (inaccurate) |         | 0,0055 |                   |
| N                  | 0*      | 7,35   |                   |
| error              |         | 1,2    |                   |
| 2s2                | 0,0888* | 0,015  |                   |
| error              |         | 0,0019 |                   |

#### PtC\_H3PO4\_160C\_1\_Pt\_L3\_0037

| #                  | Pt-O   | Pt-Pt  | R-factor filtered |
|--------------------|--------|--------|-------------------|
| R [Å]              | 1,967* | 2,757  | 17,32             |
| error              |        | 0,0063 |                   |
| s [Å]              | 0,187* | 0,0864 |                   |
| error (inaccurate) |        | 0,0055 |                   |
| N                  | 0*     | 7,33   |                   |
| error              |        | 1,2    |                   |
| 2s2                | 0,07*  | 0,0149 |                   |
| error              |        | 0,0019 |                   |

#### PtC\_H3PO4\_160C\_1\_Pt\_L3\_0038

| #                  | Pt-O    | Pt-Pt  | R-factor filtered |
|--------------------|---------|--------|-------------------|
| R [Å]              | 1,933*  | 2,752  | 17,32             |
| error              |         | 0,0065 |                   |
| s [Å]              | 0,222*  | 0,0878 |                   |
| error (inaccurate) |         | 0,0055 |                   |
| N                  | 0*      | 7,46   |                   |
| error              |         | 1,3    |                   |
| 2s2                | 0,0986* | 0,0154 |                   |
| error              |         | 0,0019 |                   |

#### PtC\_H3PO4\_160C\_1\_Pt\_L3\_0039

| #                  | Pt-O   | Pt-Pt  | R-factor filtered |
|--------------------|--------|--------|-------------------|
| R [Å]              | 1,915* | 2,747  | 15,77             |
| error              |        | 0,0067 |                   |
| s [Å]              | 0,225* | 0,0895 |                   |
| error (inaccurate) |        | 0,0056 |                   |
| N                  | 0*     | 7,74   |                   |

|       |        |       |
|-------|--------|-------|
| error |        | 1,3   |
| 2s2   | 0,101* | 0,016 |
| error |        | 0,002 |

#### PtC\_H3PO4\_160C\_1\_Pt\_L3\_0040

| #                  | Pt-O    | Pt-Pt  | R-factor filtered |
|--------------------|---------|--------|-------------------|
| R [Å]              | 1,934*  | 2,752  | 15,77             |
| error              |         | 0,0066 |                   |
| s [Å]              | 0,213*  | 0,0876 |                   |
| error (inaccurate) |         | 0,0056 |                   |
| N                  | 0*      | 7,33   |                   |
| error              |         | 1,3    |                   |
| 2s2                | 0,0904* | 0,0153 |                   |
| error              |         | 0,002  |                   |

#### PtC\_H3PO4\_160C\_1\_Pt\_L3\_0041

| #                  | Pt-O    | Pt-Pt  | R-factor filtered |
|--------------------|---------|--------|-------------------|
| R [Å]              | 1,963*  | 2,755  | 15,77             |
| error              |         | 0,0065 |                   |
| s [Å]              | 0,191*  | 0,0846 |                   |
| error (inaccurate) |         | 0,0057 |                   |
| N                  | 0*      | 6,88   |                   |
| error              |         | 1,2    |                   |
| 2s2                | 0,0733* | 0,0143 |                   |
| error              |         | 0,0019 |                   |

#### PtC\_H3PO4\_160C\_1\_Pt\_L3\_0042

| #                  | Pt-O    | Pt-Pt  | R-factor filtered |
|--------------------|---------|--------|-------------------|
| R [Å]              | 1,92*   | 2,749  | 15,77             |
| error              |         | 0,0064 |                   |
| s [Å]              | 0,221*  | 0,0878 |                   |
| error (inaccurate) |         | 0,0053 |                   |
| N                  | 0*      | 7,64   |                   |
| error              |         | 1,3    |                   |
| 2s2                | 0,0977* | 0,0154 |                   |
| error              |         | 0,0019 |                   |

#### PtC\_H3PO4\_160C\_1\_Pt\_L3\_0043

| #                  | Pt-O    | Pt-Pt  | R-factor filtered |
|--------------------|---------|--------|-------------------|
| R [Å]              | 1,935*  | 2,753  | 15,77             |
| error              |         | 0,0041 |                   |
| s [Å]              | 0,216*  | 0,087  |                   |
| error (inaccurate) |         | 0,0055 |                   |
| N                  | 0*      | 7,37   |                   |
| error              |         | 1,3    |                   |
| 2s2                | 0,0933* | 0,0151 |                   |
| error              |         | 0,0019 |                   |

## PtC\_H3PO4\_160C\_1\_Pt\_L3\_0044

| #                  | Pt-O   | Pt-Pt  | R-factor filtered |
|--------------------|--------|--------|-------------------|
| R [Å]              | 1,931* | 2,749  | 15,77             |
| error              |        | 0,0066 |                   |
| s [Å]              | 0,226* | 0,0899 |                   |
| error (inaccurate) |        | 0,0055 |                   |
| N                  | 0*     | 7,75   |                   |
| error              |        | 1,3    |                   |
| 2s2                | 0,102* | 0,0162 |                   |
| error              |        | 0,002  |                   |

## PtC\_H3PO4\_160C\_1\_Pt\_L3\_0045

| #                  | Pt-O    | Pt-Pt  | R-factor filtered |
|--------------------|---------|--------|-------------------|
| R [Å]              | 1,944*  | 2,753  | 15,77             |
| error              |         | 0,0065 |                   |
| s [Å]              | 0,207*  | 0,0856 |                   |
| error (inaccurate) |         | 0,0056 |                   |
| N                  | 0*      | 7,16   |                   |
| error              |         | 1,2    |                   |
| 2s2                | 0,0857* | 0,0147 |                   |
| error              |         | 0,0019 |                   |

## PtC\_H3PO4\_160C\_1\_Pt\_L3\_0046

| #                  | Pt-O    | Pt-Pt  | R-factor filtered |
|--------------------|---------|--------|-------------------|
| R [Å]              | 1,946*  | 2,752  | 15,77             |
| error              |         | 0,0065 |                   |
| s [Å]              | 0,197*  | 0,0854 |                   |
| error (inaccurate) |         | 0,0057 |                   |
| N                  | 0*      | 6,97   |                   |
| error              |         | 1,2    |                   |
| 2s2                | 0,0778* | 0,0146 |                   |
| error              |         | 0,0019 |                   |

## PtC\_H3PO4\_160C\_1\_Pt\_L3\_0047

| #                  | Pt-O    | Pt-Pt  | R-factor filtered |
|--------------------|---------|--------|-------------------|
| R [Å]              | 1,971*  | 2,755  | 15,77             |
| error              |         | 0,0066 |                   |
| s [Å]              | 0,182*  | 0,0837 |                   |
| error (inaccurate) |         | 0,0058 |                   |
| N                  | 0*      | 6,66   |                   |
| error              |         | 1,2    |                   |
| 2s2                | 0,0661* | 0,014  |                   |
| error              |         | 0,0019 |                   |

## PtC\_H3PO4\_160C\_1\_Pt\_L3\_0048

| #     | Pt-O   | Pt-Pt  | R-factor filtered |
|-------|--------|--------|-------------------|
| R [Å] | 1,942* | 2,75   | 15,77             |
| error |        | 0,0066 |                   |

|                    |         |        |
|--------------------|---------|--------|
| s [Å]              | 0,21*   | 0,0881 |
| error (inaccurate) |         | 0,0055 |
| N                  | 0*      | 7,43   |
| error              |         | 1,3    |
| 2s2                | 0,0885* | 0,0155 |
| error              |         | 0,0019 |

#### PtC\_H3PO4\_160C\_1\_Pt\_L3\_0049

| #                  | Pt-O    | Pt-Pt  | R-factor filtered |
|--------------------|---------|--------|-------------------|
| R [Å]              | 1,92*   | 2,746  | 17,03             |
| error              |         | 0,0066 |                   |
| s [Å]              | 0,219*  | 0,0895 |                   |
| error (inaccurate) |         | 0,0055 |                   |
| N                  | 0*      | 7,74   |                   |
| error              |         | 1,3    |                   |
| 2s2                | 0,0963* | 0,016  |                   |
| error              |         | 0,002  |                   |

#### PtC\_H3PO4\_160C\_1\_Pt\_L3\_0050

| #                  | Pt-O    | Pt-Pt  | R-factor filtered |
|--------------------|---------|--------|-------------------|
| R [Å]              | 1,977*  | 2,757  | 17,03             |
| error              |         | 0,0064 |                   |
| s [Å]              | 0,18*   | 0,0833 |                   |
| error (inaccurate) |         | 0,0057 |                   |
| N                  | 0*      | 6,73   |                   |
| error              |         | 1,2    |                   |
| 2s2                | 0,0646* | 0,0139 |                   |
| error              |         | 0,0019 |                   |

#### PtC\_H3PO4\_160C\_1\_Pt\_L3\_0051

| #                  | Pt-O   | Pt-Pt  | R-factor filtered |
|--------------------|--------|--------|-------------------|
| R [Å]              | 1,933* | 2,751  | 17,03             |
| error              |        | 0,0067 |                   |
| s [Å]              | 0,214* | 0,0891 |                   |
| error (inaccurate) |        | 0,0056 |                   |
| N                  | 0*     | 7,6    |                   |
| error              |        | 1,3    |                   |
| 2s2                | 0,092* | 0,0159 |                   |
| error              |        | 0,002  |                   |

#### PtC\_H3PO4\_160C\_1\_Pt\_L3\_0052

| #                  | Pt-O   | Pt-Pt  | R-factor filtered |
|--------------------|--------|--------|-------------------|
| R [Å]              | 1,926* | 2,749  | 17,03             |
| error              |        | 0,0066 |                   |
| s [Å]              | 0,219* | 0,0881 |                   |
| error (inaccurate) |        | 0,0056 |                   |
| N                  | 0*     | 7,42   |                   |
| error              |        | 1,3    |                   |

|       |         |        |
|-------|---------|--------|
| 2s2   | 0,0959* | 0,0155 |
| error |         | 0,002  |

#### PtC\_H3PO4\_160C\_1\_Pt\_L3\_0053

| #                  | Pt-O   | Pt-Pt  | R-factor filtered |
|--------------------|--------|--------|-------------------|
| R [Å]              | 1,964* | 2,755  | 17,03             |
| error              |        | 0,004  |                   |
| s [Å]              | 0,191* | 0,0837 |                   |
| error (inaccurate) |        | 0,0056 |                   |
| N                  | 0*     | 6,86   |                   |
| error              |        | 1,2    |                   |
| 2s2                | 0,073* | 0,014  |                   |
| error              |        | 0,0019 |                   |

#### PtC\_H3PO4\_160C\_1\_Pt\_L3\_0054

| #                  | Pt-O    | Pt-Pt  | R-factor filtered |
|--------------------|---------|--------|-------------------|
| R [Å]              | 1,97*   | 2,755  | 17,03             |
| error              |         | 0,0063 |                   |
| s [Å]              | 0,185*  | 0,0857 |                   |
| error (inaccurate) |         | 0,0055 |                   |
| N                  | 0*      | 7,24   |                   |
| error              |         | 1,2    |                   |
| 2s2                | 0,0684* | 0,0147 |                   |
| error              |         | 0,0019 |                   |

#### PtC\_H3PO4\_160C\_1\_Pt\_L3\_0055

| #                  | Pt-O    | Pt-Pt  | R-factor filtered |
|--------------------|---------|--------|-------------------|
| R [Å]              | 1,944*  | 2,75   | 17,03             |
| error              |         | 0,0065 |                   |
| s [Å]              | 0,21*   | 0,0888 |                   |
| error (inaccurate) |         | 0,0055 |                   |
| N                  | 0*      | 7,65   |                   |
| error              |         | 1,3    |                   |
| 2s2                | 0,0879* | 0,0158 |                   |
| error              |         | 0,0019 |                   |

#### PtC\_H3PO4\_160C\_1\_Pt\_L3\_0056

| #                  | Pt-O    | Pt-Pt  | R-factor filtered |
|--------------------|---------|--------|-------------------|
| R [Å]              | 1,936*  | 2,748  | 17,03             |
| error              |         | 0,0063 |                   |
| s [Å]              | 0,208*  | 0,0857 |                   |
| error (inaccurate) |         | 0,0055 |                   |
| N                  | 0*      | 7,23   |                   |
| error              |         | 1,2    |                   |
| 2s2                | 0,0868* | 0,0147 |                   |
| error              |         | 0,0019 |                   |

#### PtC\_H3PO4\_160C\_1\_Pt\_L3\_0057



| #                  | Pt-O    | Pt-Pt  | R-factor filtered |
|--------------------|---------|--------|-------------------|
| R [Å]              | 1,968*  | 2,754  | 17,03             |
| error              |         | 0,004  |                   |
| s [Å]              | 0,178*  | 0,0838 |                   |
| error (inaccurate) |         | 0,0056 |                   |
| N                  | 0*      | 6,89   |                   |
| error              |         | 1,2    |                   |
| 2s2                | 0,0636* | 0,014  |                   |
| error              |         | 0,0019 |                   |

#### PtC\_H3PO4\_160C\_1\_Pt\_L3\_0058

| #                  | Pt-O    | Pt-Pt  | R-factor filtered |
|--------------------|---------|--------|-------------------|
| R [Å]              | 1,923*  | 2,748  | 17,03             |
| error              |         | 0,0066 |                   |
| s [Å]              | 0,216*  | 0,0872 |                   |
| error (inaccurate) |         | 0,0056 |                   |
| N                  | 0*      | 7,35   |                   |
| error              |         | 1,3    |                   |
| 2s2                | 0,0932* | 0,0152 |                   |
| error              |         | 0,0019 |                   |

#### PtC\_H3PO4\_160C\_1\_Pt\_L3\_0059

| #                  | Pt-O    | Pt-Pt  | R-factor filtered |
|--------------------|---------|--------|-------------------|
| R [Å]              | 1,938*  | 2,754  | 16,29             |
| error              |         | 0,0064 |                   |
| s [Å]              | 0,211*  | 0,0892 |                   |
| error (inaccurate) |         | 0,0055 |                   |
| N                  | 0*      | 7,73   |                   |
| error              |         | 1,3    |                   |
| 2s2                | 0,0893* | 0,0159 |                   |
| error              |         | 0,0019 |                   |

#### PtC\_H3PO4\_160C\_1\_Pt\_L3\_0060

| #                  | Pt-O    | Pt-Pt  | R-factor filtered |
|--------------------|---------|--------|-------------------|
| R [Å]              | 1,967*  | 2,757  | 16,29             |
| error              |         | 0,0064 |                   |
| s [Å]              | 0,187*  | 0,083  |                   |
| error (inaccurate) |         | 0,0057 |                   |
| N                  | 0*      | 6,69   |                   |
| error              |         | 1,2    |                   |
| 2s2                | 0,0699* | 0,0138 |                   |
| error              |         | 0,0019 |                   |

#### PtC\_H3PO4\_160C\_1\_Pt\_L3\_0061

| #     | Pt-O   | Pt-Pt  | R-factor filtered |
|-------|--------|--------|-------------------|
| R [Å] | 1,946* | 2,752  | 16,29             |
| error |        | 0,0064 |                   |
| s [Å] | 0,217* | 0,0887 |                   |

|                    |         |        |
|--------------------|---------|--------|
| error (inaccurate) |         | 0,0055 |
| N                  | 0*      | 7,64   |
| error              |         | 1,3    |
| 2s2                | 0,0938* | 0,0157 |
| error              |         | 0,0019 |

#### PtC\_H3PO4\_160C\_1\_Pt\_L3\_0062

| #                  | Pt-O   | Pt-Pt  | R-factor filtered |
|--------------------|--------|--------|-------------------|
| R [Å]              | 1,922* | 2,752  | 16,29             |
| error              |        | 0,0063 |                   |
| s [Å]              | 0,231* | 0,0881 |                   |
| error (inaccurate) |        | 0,0053 |                   |
| N                  | 0*     | 7,76   |                   |
| error              |        | 1,3    |                   |
| 2s2                | 0,106* | 0,0155 |                   |
| error              |        | 0,0019 |                   |

#### PtC\_H3PO4\_160C\_1\_Pt\_L3\_0063

| #                  | Pt-O    | Pt-Pt  | R-factor filtered |
|--------------------|---------|--------|-------------------|
| R [Å]              | 1,953*  | 2,751  | 16,29             |
| error              |         | 0,0064 |                   |
| s [Å]              | 0,186*  | 0,0841 |                   |
| error (inaccurate) |         | 0,0056 |                   |
| N                  | 0*      | 6,87   |                   |
| error              |         | 1,2    |                   |
| 2s2                | 0,0688* | 0,0142 |                   |
| error              |         | 0,0019 |                   |

#### PtC\_H3PO4\_160C\_1\_Pt\_L3\_0064

| #                  | Pt-O    | Pt-Pt  | R-factor filtered |
|--------------------|---------|--------|-------------------|
| R [Å]              | 1,934*  | 2,747  | 16,29             |
| error              |         | 0,0068 |                   |
| s [Å]              | 0,217*  | 0,0904 |                   |
| error (inaccurate) |         | 0,0057 |                   |
| N                  | 0*      | 7,72   |                   |
| error              |         | 1,3    |                   |
| 2s2                | 0,0941* | 0,0164 |                   |
| error              |         | 0,002  |                   |

#### PtC\_H3PO4\_160C\_1\_Pt\_L3\_0065

| #                  | Pt-O    | Pt-Pt  | R-factor filtered |
|--------------------|---------|--------|-------------------|
| R [Å]              | 1,942*  | 2,753  | 16,29             |
| error              |         | 0,0064 |                   |
| s [Å]              | 0,197*  | 0,0835 |                   |
| error (inaccurate) |         | 0,0056 |                   |
| N                  | 0*      | 6,88   |                   |
| error              |         | 1,2    |                   |
| 2s2                | 0,0777* | 0,0139 |                   |

error 0,0019

PtC\_H3PO4\_160C\_1\_Pt\_L3\_0066

| #                  | Pt-O    | Pt-Pt  | R-factor filtered |
|--------------------|---------|--------|-------------------|
| R [Å]              | 1,962*  | 2,752  | 16,29             |
| error              |         | 0,0063 |                   |
| s [Å]              | 0,185*  | 0,0856 |                   |
| error (inaccurate) |         | 0,0054 |                   |
| N                  | 0*      | 7,2    |                   |
| error              |         | 1,2    |                   |
| 2s2                | 0,0684* | 0,0147 |                   |
| error              |         | 0,0019 |                   |

PtC\_H3PO4\_160C\_1\_Pt\_L3\_0067

| #                  | Pt-O    | Pt-Pt  | R-factor filtered |
|--------------------|---------|--------|-------------------|
| R [Å]              | 1,965*  | 2,748  | 16,29             |
| error              |         | 0,0067 |                   |
| s [Å]              | 0,191*  | 0,0879 |                   |
| error (inaccurate) |         | 0,0057 |                   |
| N                  | 0*      | 7,35   |                   |
| error              |         | 1,3    |                   |
| 2s2                | 0,0728* | 0,0155 |                   |
| error              |         | 0,002  |                   |

PtC\_H3PO4\_160C\_1\_Pt\_L3\_0068

| #                  | Pt-O   | Pt-Pt  | R-factor filtered |
|--------------------|--------|--------|-------------------|
| R [Å]              | 1,917* | 2,75   | 16,29             |
| error              |        | 0,0064 |                   |
| s [Å]              | 0,234* | 0,0853 |                   |
| error (inaccurate) |        | 0,0055 |                   |
| N                  | 0*     | 7,22   |                   |
| error              |        | 1,2    |                   |
| 2s2                | 0,109* | 0,0145 |                   |
| error              |        | 0,0019 |                   |

PtC\_H3PO4\_160C\_1\_Pt\_L3\_0069

| #                  | Pt-O   | Pt-Pt  | R-factor filtered |
|--------------------|--------|--------|-------------------|
| R [Å]              | 1,937* | 2,751  | 17,06             |
| error              |        | 0,0064 |                   |
| s [Å]              | 0,206* | 0,084  |                   |
| error (inaccurate) |        | 0,0056 |                   |
| N                  | 0*     | 6,96   |                   |
| error              |        | 1,2    |                   |
| 2s2                | 0,085* | 0,0141 |                   |
| error              |        | 0,0019 |                   |

PtC\_H3PO4\_160C\_1\_Pt\_L3\_0070

| # | Pt-O | Pt-Pt | R-factor filtered |
|---|------|-------|-------------------|
|---|------|-------|-------------------|

|                    |        |        |       |
|--------------------|--------|--------|-------|
| R [Å]              | 1,924* | 2,752  | 17,06 |
| error              |        | 0,0063 |       |
| s [Å]              | 0,228* | 0,0876 |       |
| error (inaccurate) |        | 0,0055 |       |
| N                  | 0*     | 7,5    |       |
| error              |        | 1,3    |       |
| 2s2                | 0,104* | 0,0153 |       |
| error              |        | 0,0019 |       |

#### PtC\_H3PO4\_160C\_1\_Pt\_L3\_0071

| #                  | Pt-O   | Pt-Pt  | R-factor filtered |
|--------------------|--------|--------|-------------------|
| R [Å]              | 1,925* | 2,751  | 17,06             |
| error              |        | 0,0043 |                   |
| s [Å]              | 0,216* | 0,0891 |                   |
| error (inaccurate) |        | 0,0056 |                   |
| N                  | 0*     | 7,56   |                   |
| error              |        | 1,3    |                   |
| 2s2                | 0,093* | 0,0159 |                   |
| error              |        | 0,002  |                   |

#### PtC\_H3PO4\_160C\_1\_Pt\_L3\_0072

| #                  | Pt-O    | Pt-Pt  | R-factor filtered |
|--------------------|---------|--------|-------------------|
| R [Å]              | 1,945*  | 2,754  | 17,06             |
| error              |         | 0,0065 |                   |
| s [Å]              | 0,202*  | 0,0863 |                   |
| error (inaccurate) |         | 0,0056 |                   |
| N                  | 0*      | 7,2    |                   |
| error              |         | 1,2    |                   |
| 2s2                | 0,0815* | 0,0149 |                   |
| error              |         | 0,0019 |                   |

#### PtC\_H3PO4\_160C\_1\_Pt\_L3\_0073

| #                  | Pt-O    | Pt-Pt  | R-factor filtered |
|--------------------|---------|--------|-------------------|
| R [Å]              | 1,98*   | 2,755  | 17,06             |
| error              |         | 0,0062 |                   |
| s [Å]              | 0,167*  | 0,0839 |                   |
| error (inaccurate) |         | 0,0056 |                   |
| N                  | 0*      | 6,85   |                   |
| error              |         | 1,2    |                   |
| 2s2                | 0,0558* | 0,0141 |                   |
| error              |         | 0,0019 |                   |

#### PtC\_H3PO4\_160C\_1\_Pt\_L3\_0074

| #                  | Pt-O   | Pt-Pt  | R-factor filtered |
|--------------------|--------|--------|-------------------|
| R [Å]              | 1,932* | 2,75   | 17,06             |
| error              |        | 0,0064 |                   |
| s [Å]              | 0,218* | 0,0881 |                   |
| error (inaccurate) |        | 0,0055 |                   |

|       |         |        |
|-------|---------|--------|
| N     | 0*      | 7,53   |
| error |         | 1,3    |
| 2s2   | 0,0952* | 0,0155 |
| error |         | 0,0019 |

#### PtC\_H3PO4\_160C\_1\_Pt\_L3\_0075

| #                  | Pt-O    | Pt-Pt  | R-factor filtered |
|--------------------|---------|--------|-------------------|
| R [Å]              | 1,938*  | 2,751  | 17,06             |
| error              |         | 0,0064 |                   |
| s [Å]              | 0,194*  | 0,0828 |                   |
| error (inaccurate) |         | 0,0057 |                   |
| N                  | 0*      | 6,67   |                   |
| error              |         | 1,2    |                   |
| 2s2                | 0,0752* | 0,0137 |                   |
| error              |         | 0,0019 |                   |

#### PtC\_H3PO4\_160C\_1\_Pt\_L3\_0076

| #                  | Pt-O    | Pt-Pt  | R-factor filtered |
|--------------------|---------|--------|-------------------|
| R [Å]              | 1,968*  | 2,752  | 17,06             |
| error              |         | 0,0064 |                   |
| s [Å]              | 0,175*  | 0,0842 |                   |
| error (inaccurate) |         | 0,0057 |                   |
| N                  | 0*      | 6,73   |                   |
| error              |         | 1,2    |                   |
| 2s2                | 0,0612* | 0,0142 |                   |
| error              |         | 0,0019 |                   |

#### PtC\_H3PO4\_160C\_1\_Pt\_L3\_0077

| #                  | Pt-O   | Pt-Pt  | R-factor filtered |
|--------------------|--------|--------|-------------------|
| R [Å]              | 1,922* | 2,748  | 17,06             |
| error              |        | 0,0064 |                   |
| s [Å]              | 0,226* | 0,087  |                   |
| error (inaccurate) |        | 0,0055 |                   |
| N                  | 0*     | 7,4    |                   |
| error              |        | 1,2    |                   |
| 2s2                | 0,102* | 0,0152 |                   |
| error              |        | 0,0019 |                   |

| Sample                      | Time (min) |
|-----------------------------|------------|
| PtC_dry_155C_1_Pt_L3        | 0          |
| PtC_dry_180C_1_Pt_L3        | 0          |
| PtC_H3PO4_180C_1_Pt_L3_0000 | 3          |
| PtC_H3PO4_180C_1_Pt_L3_0001 | 6          |
| PtC_H3PO4_180C_2_Pt_L3_0000 | 9          |
| PtC_H3PO4_180C_2_Pt_L3_0001 | 12         |
| PtC_H3PO4_180C_2_Pt_L3_0002 | 15         |
| PtC_H3PO4_180C_2_Pt_L3_0003 | 18         |
| PtC_H3PO4_180C_2_Pt_L3_0004 | 21         |
| PtC_H3PO4_180C_2_Pt_L3_0005 | 24         |
| PtC_H3PO4_180C_2_Pt_L3_0006 | 27         |
| PtC_H3PO4_180C_2_Pt_L3_0007 | 30         |
| PtC_H3PO4_180C_2_Pt_L3_0008 | 33         |
| PtC_H3PO4_180C_2_Pt_L3_0009 | 36         |
| PtC_H3PO4_180C_2_Pt_L3_0010 | 39         |
| PtC_H3PO4_180C_2_Pt_L3_0011 | 42         |
| PtC_H3PO4_180C_2_Pt_L3_0012 | 45         |
| PtC_H3PO4_180C_2_Pt_L3_0013 | 48         |
| PtC_H3PO4_180C_2_Pt_L3_0014 | 51         |
| PtC_H3PO4_180C_2_Pt_L3_0015 | 54         |
| PtC_H3PO4_180C_2_Pt_L3_0016 | 57         |
| PtC_H3PO4_180C_2_Pt_L3_0017 | 60         |
| PtC_H3PO4_180C_2_Pt_L3_0018 | 63         |
| PtC_H3PO4_180C_2_Pt_L3_0019 | 66         |
| PtC_H3PO4_180C_2_Pt_L3_0020 | 69         |
| PtC_H3PO4_180C_2_Pt_L3_0021 | 72         |
| PtC_H3PO4_180C_2_Pt_L3_0022 | 75         |
| PtC_H3PO4_180C_2_Pt_L3_0023 | 78         |
| PtC_H3PO4_180C_2_Pt_L3_0024 | 81         |
| PtC_H3PO4_180C_2_Pt_L3_0025 | 84         |
| PtC_H3PO4_180C_2_Pt_L3_0026 | 87         |
| PtC_H3PO4_180C_2_Pt_L3_0027 | 90         |
| PtC_H3PO4_180C_2_Pt_L3_0028 | 93         |
| PtC_H3PO4_180C_2_Pt_L3_0029 | 96         |
| PtC_H3PO4_180C_2_Pt_L3_0030 | 99         |
| PtC_H3PO4_180C_2_Pt_L3_0031 | 102        |
| PtC_H3PO4_180C_2_Pt_L3_0032 | 105        |
| PtC_H3PO4_180C_2_Pt_L3_0033 | 108        |
| PtC_H3PO4_180C_2_Pt_L3_0034 | 111        |
| PtC_H3PO4_180C_2_Pt_L3_0035 | 114        |
| PtC_H3PO4_180C_2_Pt_L3_0036 | 117        |
| PtC_H3PO4_180C_2_Pt_L3_0037 | 120        |
| PtC_H3PO4_180C_2_Pt_L3_0038 | 123        |
| PtC_H3PO4_180C_2_Pt_L3_0039 | 126        |
| PtC_H3PO4_180C_2_Pt_L3_0040 | 129        |
| PtC_H3PO4_180C_2_Pt_L3_0041 | 132        |

|                             |     |
|-----------------------------|-----|
| PtC_H3PO4_180C_2_Pt_L3_0042 | 135 |
| PtC_H3PO4_180C_2_Pt_L3_0043 | 138 |
| PtC_H3PO4_180C_2_Pt_L3_0044 | 141 |
| PtC_H3PO4_180C_2_Pt_L3_0045 | 144 |
| PtC_H3PO4_180C_2_Pt_L3_0046 | 147 |
| PtC_H3PO4_180C_2_Pt_L3_0047 | 150 |
| PtC_H3PO4_180C_2_Pt_L3_0048 | 153 |
| PtC_H3PO4_180C_2_Pt_L3_0049 | 156 |
| PtC_H3PO4_180C_2_Pt_L3_0050 | 159 |
| PtC_H3PO4_180C_2_Pt_L3_0051 | 162 |
| PtC_H3PO4_180C_2_Pt_L3_0052 | 165 |
| PtC_H3PO4_180C_2_Pt_L3_0053 | 168 |
| PtC_H3PO4_180C_2_Pt_L3_0054 | 171 |
| PtC_H3PO4_180C_2_Pt_L3_0055 | 174 |
| PtC_H3PO4_180C_2_Pt_L3_0056 | 177 |
| PtC_H3PO4_180C_2_Pt_L3_0057 | 180 |
| PtC_H3PO4_180C_2_Pt_L3_0058 | 183 |
| PtC_H3PO4_180C_2_Pt_L3_0059 | 186 |
| PtC_H3PO4_180C_2_Pt_L3_0060 | 189 |
| PtC_H3PO4_180C_2_Pt_L3_0061 | 192 |
| PtC_H3PO4_180C_2_Pt_L3_0062 | 195 |
| PtC_H3PO4_180C_2_Pt_L3_0063 | 198 |
| PtC_H3PO4_180C_2_Pt_L3_0064 | 201 |
| PtC_H3PO4_180C_2_Pt_L3_0065 | 204 |
| PtC_H3PO4_180C_2_Pt_L3_0066 | 207 |
| 0                           | 210 |
| 0                           | 213 |
| 0                           | 216 |
| 0                           | 219 |
| 0                           | 222 |
| 0                           | 225 |
| 0                           | 228 |
| 0                           | 231 |
| 0                           | 234 |
| 0                           | 237 |
| 0                           | 240 |

PtC\_dry\_155C\_1\_Pt\_L3

S02 = 0,92457225

| #                  | Pt-O   | Pt-Pt  | R-factor filtered |
|--------------------|--------|--------|-------------------|
| R [Å]              | 1,997  | 2,735  | 16,1              |
| error              | 0,025  | 0,011  |                   |
| s [Å]              | 0,0883 | 0,0949 |                   |
| error (inaccurate) | 0,027  | 0,011  |                   |
| N                  | 1,62   | 4,58   |                   |
| error              | 0,57   | 1,5    |                   |
| 2s2                | 0,016  | 0,018  |                   |
| error              | 0,009  | 0,004  |                   |

PtC\_dry\_180C\_1\_Pt\_L3

| #                  | Pt-O   | Pt-Pt  | R-factor filtered |
|--------------------|--------|--------|-------------------|
| R [Å]              | 2,005  | 2,743  | 16,1              |
| error              | 0,029  | 0,011  |                   |
| s [Å]              | 0,103  | 0,0942 |                   |
| error (inaccurate) | 0,029  | 0,011  |                   |
| N                  | 1,8    | 4,42   |                   |
| error              | 0,65   | 1,5    |                   |
| 2s2                | 0,0211 | 0,018  |                   |
| error              | 0,011  | 0,0041 |                   |

PtC\_H3PO4\_180C\_1\_Pt\_L3\_0000

| #                  | Pt-O   | Pt-Pt  | R-factor filtered |
|--------------------|--------|--------|-------------------|
| R [Å]              | 1,93*  | 2,746  | 16,1              |
| error              |        | 0,0074 |                   |
| s [Å]              | 0,228* | 0,092  |                   |
| error (inaccurate) |        | 0,006  |                   |
| N                  | 0*     | 7,52   |                   |
| error              |        | 1,4    |                   |
| 2s2                | 0,104* | 0,0169 |                   |
| error              |        | 0,0022 |                   |

PtC\_H3PO4\_180C\_1\_Pt\_L3\_0001

| #                  | Pt-O    | Pt-Pt    | R-factor filtered |
|--------------------|---------|----------|-------------------|
| R [Å]              | 1,941*  | 2,748    | 16,1              |
| error              |         | 0,0076   |                   |
| s [Å]              | 0,219*  | 0,091    |                   |
| error (inaccurate) |         | 0,0061   |                   |
| N                  | 0*      | 7,19     |                   |
| error              |         | 1,4      |                   |
| 2s2                | 0,0962* | 1,66E-02 |                   |
| error              |         | 0,0022   |                   |

PtC\_H3PO4\_180C\_2\_Pt\_L3\_0000

| #     | Pt-O   | Pt-Pt  | R-factor filtered |
|-------|--------|--------|-------------------|
| R [Å] | 1,919* | 2,745  | 16,1              |
| error |        | 0,0072 |                   |



|                    |        |        |
|--------------------|--------|--------|
| s [Å]              | 0,234* | 0,0902 |
| error (inaccurate) |        | 0,0059 |
| N                  | 0*     | 7,34   |
| error              |        | 1,3    |
| 2s2                | 0,109* | 0,0163 |
| error              |        | 0,0021 |

#### PtC\_H3PO4\_180C\_2\_Pt\_L3\_0001

| #                  | Pt-O   | Pt-Pt  | R-factor filtered |
|--------------------|--------|--------|-------------------|
| R [Å]              | 1,926* | 2,75   | 16,1              |
| error              |        | 0,007  |                   |
| s [Å]              | 0,231* | 0,0897 |                   |
| error (inaccurate) |        | 0,0057 |                   |
| N                  | 0*     | 7,42   |                   |
| error              |        | 1,3    |                   |
| 2s2                | 0,107* | 0,0161 |                   |
| error              |        | 0,0021 |                   |

#### PtC\_H3PO4\_180C\_2\_Pt\_L3\_0002

| #                  | Pt-O    | Pt-Pt  | R-factor filtered |
|--------------------|---------|--------|-------------------|
| R [Å]              | 1,926*  | 2,75   | 16,1              |
| error              |         | 0,0069 |                   |
| s [Å]              | 0,223*  | 0,0882 |                   |
| error (inaccurate) |         | 0,0057 |                   |
| N                  | 0*      | 7,21   |                   |
| error              |         | 1,3    |                   |
| 2s2                | 0,0997* | 0,0155 |                   |
| error              |         | 0,002  |                   |

#### PtC\_H3PO4\_180C\_2\_Pt\_L3\_0003

| #                  | Pt-O    | Pt-Pt  | R-factor filtered |
|--------------------|---------|--------|-------------------|
| R [Å]              | 1,927*  | 2,746  | 16,1              |
| error              |         | 0,007  |                   |
| s [Å]              | 0,221*  | 0,0874 |                   |
| error (inaccurate) |         | 0,0058 |                   |
| N                  | 0*      | 7,08   |                   |
| error              |         | 1,3    |                   |
| 2s2                | 0,0973* | 0,0153 |                   |
| error              |         | 0,002  |                   |

#### PtC\_H3PO4\_180C\_2\_Pt\_L3\_0004

| #                  | Pt-O   | Pt-Pt  | R-factor filtered |
|--------------------|--------|--------|-------------------|
| R [Å]              | 1,916* | 2,741  | 16,1              |
| error              |        | 0,0069 |                   |
| s [Å]              | 0,226* | 0,0869 |                   |
| error (inaccurate) |        | 0,0057 |                   |
| N                  | 0*     | 7,1    |                   |
| error              |        | 1,3    |                   |

|       |        |        |
|-------|--------|--------|
| 2s2   | 0,103* | 0,0151 |
| error |        | 0,002  |

#### PtC\_H3PO4\_180C\_2\_Pt\_L3\_0005

| #                  | Pt-O    | Pt-Pt  | R-factor filtered |
|--------------------|---------|--------|-------------------|
| R [Å]              | 1,924*  | 2,749  | 16,1              |
| error              |         | 0,0068 |                   |
| s [Å]              | 0,222*  | 0,0857 |                   |
| error (inaccurate) |         | 0,0058 |                   |
| N                  | 0*      | 6,93   |                   |
| error              |         | 1,2    |                   |
| 2s2                | 0,0989* | 0,0147 |                   |
| error              |         | 0,002  |                   |

#### PtC\_H3PO4\_180C\_2\_Pt\_L3\_0006

| #                  | Pt-O    | Pt-Pt  | R-factor filtered |
|--------------------|---------|--------|-------------------|
| R [Å]              | 1,918*  | 2,751  | 16,1              |
| error              |         | 0,0069 |                   |
| s [Å]              | 0,221*  | 0,0874 |                   |
| error (inaccurate) |         | 0,0058 |                   |
| N                  | 0*      | 7,06   |                   |
| error              |         | 1,3    |                   |
| 2s2                | 0,0973* | 0,0153 |                   |
| error              |         | 0,002  |                   |

#### PtC\_H3PO4\_180C\_2\_Pt\_L3\_0007

| #                  | Pt-O   | Pt-Pt  | R-factor filtered |
|--------------------|--------|--------|-------------------|
| R [Å]              | 1,907* | 2,747  | 16,1              |
| error              |        | 0,0072 |                   |
| s [Å]              | 0,232* | 0,0911 |                   |
| error (inaccurate) |        | 0,0058 |                   |
| N                  | 0*     | 7,62   |                   |
| error              |        | 1,4    |                   |
| 2s2                | 0,107* | 0,0166 |                   |
| error              |        | 0,0021 |                   |

#### PtC\_H3PO4\_180C\_2\_Pt\_L3\_0008

| #                  | Pt-O   | Pt-Pt  | R-factor filtered |
|--------------------|--------|--------|-------------------|
| R [Å]              | 1,905* | 2,746  | 16,1              |
| error              |        | 0,0072 |                   |
| s [Å]              | 0,238* | 0,0895 |                   |
| error (inaccurate) |        | 0,0059 |                   |
| N                  | 0*     | 7,35   |                   |
| error              |        | 1,3    |                   |
| 2s2                | 0,114* | 0,016  |                   |
| error              |        | 0,0021 |                   |

#### PtC\_H3PO4\_180C\_2\_Pt\_L3\_0009

| #                  | Pt-O    | Pt-Pt  | R-factor filtered |
|--------------------|---------|--------|-------------------|
| R [Å]              | 1,922*  | 2,749  | 15,75             |
| error              |         | 0,007  |                   |
| s [Å]              | 0,205*  | 0,0854 |                   |
| error (inaccurate) |         | 0,006  |                   |
| N                  | 0*      | 6,66   |                   |
| error              |         | 1,2    |                   |
| 2s2                | 0,0844* | 0,0146 |                   |
| error              |         | 0,002  |                   |

#### PtC\_H3PO4\_180C\_2\_Pt\_L3\_0010

| #                  | Pt-O    | Pt-Pt  | R-factor filtered |
|--------------------|---------|--------|-------------------|
| R [Å]              | 1,929*  | 2,752  | 15,75             |
| error              |         | 0,0071 |                   |
| s [Å]              | 0,217*  | 0,091  |                   |
| error (inaccurate) |         | 0,0058 |                   |
| N                  | 0*      | 7,59   |                   |
| error              |         | 1,4    |                   |
| 2s2                | 0,0941* | 0,0166 |                   |
| error              |         | 0,0021 |                   |

#### PtC\_H3PO4\_180C\_2\_Pt\_L3\_0011

| #                  | Pt-O   | Pt-Pt  | R-factor filtered |
|--------------------|--------|--------|-------------------|
| R [Å]              | 1,918* | 2,749  | 15,75             |
| error              |        | 0,0072 |                   |
| s [Å]              | 0,228* | 0,0914 |                   |
| error (inaccurate) |        | 0,0059 |                   |
| N                  | 0*     | 7,53   |                   |
| error              |        | 1,4    |                   |
| 2s2                | 0,104* | 0,0167 |                   |
| error              |        | 0,0021 |                   |

#### PtC\_H3PO4\_180C\_2\_Pt\_L3\_0012

| #                  | Pt-O   | Pt-Pt  | R-factor filtered |
|--------------------|--------|--------|-------------------|
| R [Å]              | 1,902* | 2,746  | 15,75             |
| error              |        | 0,0071 |                   |
| s [Å]              | 0,245* | 0,0914 |                   |
| error (inaccurate) |        | 0,0058 |                   |
| N                  | 0*     | 7,69   |                   |
| error              |        | 1,4    |                   |
| 2s2                | 0,12*  | 0,0167 |                   |
| error              |        | 0,0021 |                   |

#### PtC\_H3PO4\_180C\_2\_Pt\_L3\_0013

| #     | Pt-O   | Pt-Pt  | R-factor filtered |
|-------|--------|--------|-------------------|
| R [Å] | 1,93*  | 2,753  | 15,75             |
| error |        | 0,007  |                   |
| s [Å] | 0,216* | 0,0889 |                   |

|                    |         |        |
|--------------------|---------|--------|
| error (inaccurate) |         | 0,0058 |
| N                  | 0*      | 7,27   |
| error              |         | 1,3    |
| 2s2                | 0,0936* | 0,0158 |
| error              |         | 0,0021 |

#### PtC\_H3PO4\_180C\_2\_Pt\_L3\_0014

| #                  | Pt-O   | Pt-Pt  | R-factor filtered |
|--------------------|--------|--------|-------------------|
| R [Å]              | 1,91*  | 2,749  | 15,75             |
| error              |        | 0,0043 |                   |
| s [Å]              | 0,236* | 0,0878 |                   |
| error (inaccurate) |        | 0,0058 |                   |
| N                  | 0*     | 7,18   |                   |
| error              |        | 1,3    |                   |
| 2s2                | 0,111* | 0,0154 |                   |
| error              |        | 0,002  |                   |

#### PtC\_H3PO4\_180C\_2\_Pt\_L3\_0015

| #                  | Pt-O   | Pt-Pt  | R-factor filtered |
|--------------------|--------|--------|-------------------|
| R [Å]              | 1,897* | 2,744  | 15,75             |
| error              |        | 0,0071 |                   |
| s [Å]              | 0,242* | 0,0913 |                   |
| error (inaccurate) |        | 0,0057 |                   |
| N                  | 0*     | 7,7    |                   |
| error              |        | 1,4    |                   |
| 2s2                | 0,117* | 0,0167 |                   |
| error              |        | 0,0021 |                   |

#### PtC\_H3PO4\_180C\_2\_Pt\_L3\_0016

| #                  | Pt-O   | Pt-Pt  | R-factor filtered |
|--------------------|--------|--------|-------------------|
| R [Å]              | 1,914* | 2,747  | 15,75             |
| error              |        | 0,007  |                   |
| s [Å]              | 0,234* | 0,0892 |                   |
| error (inaccurate) |        | 0,0058 |                   |
| N                  | 0*     | 7,39   |                   |
| error              |        | 1,3    |                   |
| 2s2                | 0,11*  | 0,0159 |                   |
| error              |        | 0,0021 |                   |

#### PtC\_H3PO4\_180C\_2\_Pt\_L3\_0017

| #                  | Pt-O   | Pt-Pt  | R-factor filtered |
|--------------------|--------|--------|-------------------|
| R [Å]              | 1,915* | 2,75   | 15,75             |
| error              |        | 0,007  |                   |
| s [Å]              | 0,238* | 0,0887 |                   |
| error (inaccurate) |        | 0,0058 |                   |
| N                  | 0*     | 7,28   |                   |
| error              |        | 1,3    |                   |
| 2s2                | 0,113* | 0,0157 |                   |

error 0,002

PtC\_H3PO4\_180C\_2\_Pt\_L3\_0018

| #                  | Pt-O   | Pt-Pt  | R-factor filtered |
|--------------------|--------|--------|-------------------|
| R [Å]              | 1,912* | 2,746  | 15,75             |
| error              |        | 0,0072 |                   |
| s [Å]              | 0,227* | 0,0897 |                   |
| error (inaccurate) |        | 0,0059 |                   |
| N                  | 0*     | 7,35   |                   |
| error              |        | 1,3    |                   |
| 2s2                | 0,103* | 0,0161 |                   |
| error              |        | 0,0021 |                   |

PtC\_H3PO4\_180C\_2\_Pt\_L3\_0019

| #                  | Pt-O    | Pt-Pt  | R-factor filtered |
|--------------------|---------|--------|-------------------|
| R [Å]              | 1,922*  | 2,753  | 15,19             |
| error              |         | 0,0068 |                   |
| s [Å]              | 0,205*  | 0,0864 |                   |
| error (inaccurate) |         | 0,0057 |                   |
| N                  | 0*      | 7,06   |                   |
| error              |         | 1,2    |                   |
| 2s2                | 0,0844* | 0,0149 |                   |
| error              |         | 0,002  |                   |

PtC\_H3PO4\_180C\_2\_Pt\_L3\_0020

| #                  | Pt-O    | Pt-Pt  | R-factor filtered |
|--------------------|---------|--------|-------------------|
| R [Å]              | 1,929*  | 2,752  | 15,19             |
| error              |         | 0,0069 |                   |
| s [Å]              | 0,217*  | 0,0867 |                   |
| error (inaccurate) |         | 0,0058 |                   |
| N                  | 0*      | 7,04   |                   |
| error              |         | 1,2    |                   |
| 2s2                | 0,0941* | 0,015  |                   |
| error              |         | 0,002  |                   |

PtC\_H3PO4\_180C\_2\_Pt\_L3\_0021

| #                  | Pt-O   | Pt-Pt  | R-factor filtered |
|--------------------|--------|--------|-------------------|
| R [Å]              | 1,918* | 2,748  | 15,19             |
| error              |        | 0,007  |                   |
| s [Å]              | 0,228* | 0,09   |                   |
| error (inaccurate) |        | 0,0057 |                   |
| N                  | 0*     | 7,57   |                   |
| error              |        | 1,3    |                   |
| 2s2                | 0,104* | 0,0162 |                   |
| error              |        | 0,0021 |                   |

PtC\_H3PO4\_180C\_2\_Pt\_L3\_0022

| # | Pt-O | Pt-Pt | R-factor filtered |
|---|------|-------|-------------------|
|---|------|-------|-------------------|

|                    |        |        |       |
|--------------------|--------|--------|-------|
| R [Å]              | 1,902* | 2,749  | 15,19 |
| error              |        | 0,0068 |       |
| s [Å]              | 0,245* | 0,0905 |       |
| error (inaccurate) |        | 0,0057 |       |
| N                  | 0*     | 7,69   |       |
| error              |        | 1,3    |       |
| 2s2                | 0,12*  | 0,0164 |       |
| error              |        | 0,002  |       |

#### PtC\_H3PO4\_180C\_2\_Pt\_L3\_0023

| #                  | Pt-O    | Pt-Pt  | R-factor filtered |
|--------------------|---------|--------|-------------------|
| R [Å]              | 1,93*   | 2,751  | 15,19             |
| error              |         | 0,0068 |                   |
| s [Å]              | 0,216*  | 0,0888 |                   |
| error (inaccurate) |         | 0,0057 |                   |
| N                  | 0*      | 7,33   |                   |
| error              |         | 1,3    |                   |
| 2s2                | 0,0936* | 0,0158 |                   |
| error              |         | 0,002  |                   |

#### PtC\_H3PO4\_180C\_2\_Pt\_L3\_0024

| #                  | Pt-O   | Pt-Pt  | R-factor filtered |
|--------------------|--------|--------|-------------------|
| R [Å]              | 1,91*  | 2,75   | 15,19             |
| error              |        | 0,0069 |                   |
| s [Å]              | 0,236* | 0,09   |                   |
| error (inaccurate) |        | 0,0057 |                   |
| N                  | 0*     | 7,64   |                   |
| error              |        | 1,3    |                   |
| 2s2                | 0,111* | 0,0162 |                   |
| error              |        | 0,002  |                   |

#### PtC\_H3PO4\_180C\_2\_Pt\_L3\_0025

| #                  | Pt-O   | Pt-Pt  | R-factor filtered |
|--------------------|--------|--------|-------------------|
| R [Å]              | 1,897* | 2,75   | 15,19             |
| error              |        | 0,0068 |                   |
| s [Å]              | 0,242* | 0,0906 |                   |
| error (inaccurate) |        | 0,0056 |                   |
| N                  | 0*     | 7,78   |                   |
| error              |        | 1,3    |                   |
| 2s2                | 0,117* | 0,0164 |                   |
| error              |        | 0,002  |                   |

#### PtC\_H3PO4\_180C\_2\_Pt\_L3\_0026

| #                  | Pt-O   | Pt-Pt  | R-factor filtered |
|--------------------|--------|--------|-------------------|
| R [Å]              | 1,914* | 2,754  | 15,19             |
| error              |        | 0,0069 |                   |
| s [Å]              | 0,234* | 0,0863 |                   |
| error (inaccurate) |        | 0,0059 |                   |

|       |       |        |
|-------|-------|--------|
| N     | 0*    | 6,9    |
| error |       | 1,2    |
| 2s2   | 0,11* | 0,0149 |
| error |       | 0,002  |

#### PtC\_H3PO4\_180C\_2\_Pt\_L3\_0027

| #                  | Pt-O   | Pt-Pt  | R-factor filtered |
|--------------------|--------|--------|-------------------|
| R [Å]              | 1,915* | 2,748  | 15,19             |
| error              |        | 0,0068 |                   |
| s [Å]              | 0,238* | 0,089  |                   |
| error (inaccurate) |        | 0,0056 |                   |
| N                  | 0*     | 7,53   |                   |
| error              |        | 1,3    |                   |
| 2s2                | 0,113* | 0,0158 |                   |
| error              |        | 0,002  |                   |

#### PtC\_H3PO4\_180C\_2\_Pt\_L3\_0028

| #                  | Pt-O   | Pt-Pt  | R-factor filtered |
|--------------------|--------|--------|-------------------|
| R [Å]              | 1,912* | 2,75   | 15,19             |
| error              |        | 0,0066 |                   |
| s [Å]              | 0,227* | 0,0853 |                   |
| error (inaccurate) |        | 0,0056 |                   |
| N                  | 0*     | 7,03   |                   |
| error              |        | 1,2    |                   |
| 2s2                | 0,103* | 0,0146 |                   |
| error              |        | 0,0019 |                   |

#### PtC\_H3PO4\_180C\_2\_Pt\_L3\_0029

| #                  | Pt-O    | Pt-Pt  | R-factor filtered |
|--------------------|---------|--------|-------------------|
| R [Å]              | 1,922*  | 2,749  | 15,33             |
| error              |         | 0,0068 |                   |
| s [Å]              | 0,205*  | 0,0877 |                   |
| error (inaccurate) |         | 0,0057 |                   |
| N                  | 0*      | 7,32   |                   |
| error              |         | 1,3    |                   |
| 2s2                | 0,0844* | 0,0154 |                   |
| error              |         | 0,002  |                   |

#### PtC\_H3PO4\_180C\_2\_Pt\_L3\_0030

| #                  | Pt-O    | Pt-Pt  | R-factor filtered |
|--------------------|---------|--------|-------------------|
| R [Å]              | 1,929*  | 2,755  | 15,33             |
| error              |         | 0,0066 |                   |
| s [Å]              | 0,217*  | 0,0894 |                   |
| error (inaccurate) |         | 0,0055 |                   |
| N                  | 0*      | 7,62   |                   |
| error              |         | 1,3    |                   |
| 2s2                | 0,0941* | 0,016  |                   |
| error              |         | 0,002  |                   |

## PtC\_H3PO4\_180C\_2\_Pt\_L3\_0031

| #                  | Pt-O   | Pt-Pt  | R-factor filtered |
|--------------------|--------|--------|-------------------|
| R [Å]              | 1,918* | 2,747  | 15,33             |
| error              |        | 0,0068 |                   |
| s [Å]              | 0,228* | 0,0892 |                   |
| error (inaccurate) |        | 0,0057 |                   |
| N                  | 0*     | 7,52   |                   |
| error              |        | 1,3    |                   |
| 2s2                | 0,104* | 0,0159 |                   |
| error              |        | 0,002  |                   |

## PtC\_H3PO4\_180C\_2\_Pt\_L3\_0032

| #                  | Pt-O   | Pt-Pt  | R-factor filtered |
|--------------------|--------|--------|-------------------|
| R [Å]              | 1,902* | 2,749  | 15,33             |
| error              |        | 0,0068 |                   |
| s [Å]              | 0,245* | 0,0883 |                   |
| error (inaccurate) |        | 0,0057 |                   |
| N                  | 0*     | 7,33   |                   |
| error              |        | 1,3    |                   |
| 2s2                | 0,12*  | 0,0156 |                   |
| error              |        | 0,002  |                   |

## PtC\_H3PO4\_180C\_2\_Pt\_L3\_0033

| #                  | Pt-O    | Pt-Pt  | R-factor filtered |
|--------------------|---------|--------|-------------------|
| R [Å]              | 1,93*   | 2,753  | 15,33             |
| error              |         | 0,0068 |                   |
| s [Å]              | 0,216*  | 0,0869 |                   |
| error (inaccurate) |         | 0,0058 |                   |
| N                  | 0*      | 7,12   |                   |
| error              |         | 1,3    |                   |
| 2s2                | 0,0936* | 0,0151 |                   |
| error              |         | 0,002  |                   |

## PtC\_H3PO4\_180C\_2\_Pt\_L3\_0034

| #                  | Pt-O   | Pt-Pt  | R-factor filtered |
|--------------------|--------|--------|-------------------|
| R [Å]              | 1,91*  | 2,752  | 15,33             |
| error              |        | 0,0068 |                   |
| s [Å]              | 0,236* | 0,0881 |                   |
| error (inaccurate) |        | 0,0057 |                   |
| N                  | 0*     | 7,32   |                   |
| error              |        | 1,3    |                   |
| 2s2                | 0,111* | 0,0155 |                   |
| error              |        | 0,002  |                   |

## PtC\_H3PO4\_180C\_2\_Pt\_L3\_0035

| #     | Pt-O   | Pt-Pt | R-factor filtered |
|-------|--------|-------|-------------------|
| R [Å] | 1,897* | 2,75  | 15,33             |



|                    |        |        |
|--------------------|--------|--------|
| error              |        | 0,0067 |
| s [Å]              | 0,242* | 0,0863 |
| error (inaccurate) |        | 0,0057 |
| N                  | 0*     | 7,1    |
| error              |        | 1,2    |
| 2s2                | 0,117* | 0,0149 |
| error              |        | 0,002  |

#### PtC\_H3PO4\_180C\_2\_Pt\_L3\_0036

| #                  | Pt-O   | Pt-Pt  | R-factor filtered |
|--------------------|--------|--------|-------------------|
| R [Å]              | 1,914* | 2,754  | 15,33             |
| error              |        | 0,0068 |                   |
| s [Å]              | 0,234* | 0,0872 |                   |
| error (inaccurate) |        | 0,0058 |                   |
| N                  | 0*     | 7,15   |                   |
| error              |        | 1,3    |                   |
| 2s2                | 0,11*  | 0,0152 |                   |
| error              |        | 0,002  |                   |

#### PtC\_H3PO4\_180C\_2\_Pt\_L3\_0037

| #                  | Pt-O   | Pt-Pt  | R-factor filtered |
|--------------------|--------|--------|-------------------|
| R [Å]              | 1,915* | 2,744  | 15,33             |
| error              |        | 0,0068 |                   |
| s [Å]              | 0,238* | 0,0899 |                   |
| error (inaccurate) |        | 0,0056 |                   |
| N                  | 0*     | 7,67   |                   |
| error              |        | 1,3    |                   |
| 2s2                | 0,113* | 0,0162 |                   |
| error              |        | 0,002  |                   |

#### PtC\_H3PO4\_180C\_2\_Pt\_L3\_0038

| #                  | Pt-O   | Pt-Pt  | R-factor filtered |
|--------------------|--------|--------|-------------------|
| R [Å]              | 1,912* | 2,749  | 15,33             |
| error              |        | 0,0065 |                   |
| s [Å]              | 0,227* | 0,0856 |                   |
| error (inaccurate) |        | 0,0056 |                   |
| N                  | 0*     | 7,04   |                   |
| error              |        | 1,2    |                   |
| 2s2                | 0,103* | 0,0146 |                   |
| error              |        | 0,0019 |                   |

#### PtC\_H3PO4\_180C\_2\_Pt\_L3\_0039

| #                  | Pt-O   | Pt-Pt  | R-factor filtered |
|--------------------|--------|--------|-------------------|
| R [Å]              | 1,922* | 2,753  | 15,07             |
| error              |        | 0,0065 |                   |
| s [Å]              | 0,205* | 0,0858 |                   |
| error (inaccurate) |        | 0,0056 |                   |
| N                  | 0*     | 7,24   |                   |

|       |         |        |
|-------|---------|--------|
| error |         | 1,2    |
| 2s2   | 0,0844* | 0,0147 |
| error |         | 0,0019 |

#### PtC\_H3PO4\_180C\_2\_Pt\_L3\_0040

| #                  | Pt-O    | Pt-Pt  | R-factor filtered |
|--------------------|---------|--------|-------------------|
| R [Å]              | 1,929*  | 2,754  | 15,07             |
| error              |         | 0,0064 |                   |
| s [Å]              | 0,217*  | 0,087  |                   |
| error (inaccurate) |         | 0,0055 |                   |
| N                  | 0*      | 7,46   |                   |
| error              |         | 1,3    |                   |
| 2s2                | 0,0941* | 0,0152 |                   |
| error              |         | 0,0019 |                   |

#### PtC\_H3PO4\_180C\_2\_Pt\_L3\_0041

| #                  | Pt-O   | Pt-Pt  | R-factor filtered |
|--------------------|--------|--------|-------------------|
| R [Å]              | 1,918* | 2,752  | 15,07             |
| error              |        | 0,0066 |                   |
| s [Å]              | 0,228* | 0,0869 |                   |
| error (inaccurate) |        | 0,0056 |                   |
| N                  | 0*     | 7,21   |                   |
| error              |        | 1,2    |                   |
| 2s2                | 0,104* | 0,0151 |                   |
| error              |        | 0,0019 |                   |

#### PtC\_H3PO4\_180C\_2\_Pt\_L3\_0042

| #                  | Pt-O   | Pt-Pt  | R-factor filtered |
|--------------------|--------|--------|-------------------|
| R [Å]              | 1,902* | 2,752  | 15,07             |
| error              |        | 0,0065 |                   |
| s [Å]              | 0,245* | 0,087  |                   |
| error (inaccurate) |        | 0,0055 |                   |
| N                  | 0*     | 7,35   |                   |
| error              |        | 1,3    |                   |
| 2s2                | 0,12*  | 0,0152 |                   |
| error              |        | 0,0019 |                   |

#### PtC\_H3PO4\_180C\_2\_Pt\_L3\_0043

| #                  | Pt-O    | Pt-Pt  | R-factor filtered |
|--------------------|---------|--------|-------------------|
| R [Å]              | 1,93*   | 2,753  | 15,07             |
| error              |         | 0,0066 |                   |
| s [Å]              | 0,216*  | 0,0865 |                   |
| error (inaccurate) |         | 0,0056 |                   |
| N                  | 0*      | 7,17   |                   |
| error              |         | 1,2    |                   |
| 2s2                | 0,0936* | 0,015  |                   |
| error              |         | 0,0019 |                   |

## PtC\_H3PO4\_180C\_2\_Pt\_L3\_0044

| #                  | Pt-O   | Pt-Pt  | R-factor filtered |
|--------------------|--------|--------|-------------------|
| R [Å]              | 1,91*  | 2,75   | 15,07             |
| error              |        | 0,0067 |                   |
| s [Å]              | 0,236* | 0,0885 |                   |
| error (inaccurate) |        | 0,0056 |                   |
| N                  | 0*     | 7,54   |                   |
| error              |        | 1,3    |                   |
| 2s2                | 0,111* | 0,0157 |                   |
| error              |        | 0,002  |                   |

## PtC\_H3PO4\_180C\_2\_Pt\_L3\_0045

| #                  | Pt-O   | Pt-Pt  | R-factor filtered |
|--------------------|--------|--------|-------------------|
| R [Å]              | 1,897* | 2,753  | 15,07             |
| error              |        | 0,0066 |                   |
| s [Å]              | 0,242* | 0,0881 |                   |
| error (inaccurate) |        | 0,0056 |                   |
| N                  | 0*     | 7,39   |                   |
| error              |        | 1,3    |                   |
| 2s2                | 0,117* | 0,0155 |                   |
| error              |        | 0,002  |                   |

## PtC\_H3PO4\_180C\_2\_Pt\_L3\_0046

| #                  | Pt-O   | Pt-Pt  | R-factor filtered |
|--------------------|--------|--------|-------------------|
| R [Å]              | 1,914* | 2,754  | 15,07             |
| error              |        | 0,0065 |                   |
| s [Å]              | 0,234* | 0,089  |                   |
| error (inaccurate) |        | 0,0055 |                   |
| N                  | 0*     | 7,63   |                   |
| error              |        | 1,3    |                   |
| 2s2                | 0,11*  | 0,0158 |                   |
| error              |        | 0,002  |                   |

## PtC\_H3PO4\_180C\_2\_Pt\_L3\_0047

| #                  | Pt-O   | Pt-Pt  | R-factor filtered |
|--------------------|--------|--------|-------------------|
| R [Å]              | 1,915* | 2,75   | 15,07             |
| error              |        | 0,0067 |                   |
| s [Å]              | 0,238* | 0,0881 |                   |
| error (inaccurate) |        | 0,0056 |                   |
| N                  | 0*     | 7,49   |                   |
| error              |        | 1,3    |                   |
| 2s2                | 0,113* | 0,0155 |                   |
| error              |        | 0,002  |                   |

## PtC\_H3PO4\_180C\_2\_Pt\_L3\_0048

| #     | Pt-O   | Pt-Pt  | R-factor filtered |
|-------|--------|--------|-------------------|
| R [Å] | 1,912* | 2,752  | 15,07             |
| error |        | 0,0066 |                   |

|                    |        |        |
|--------------------|--------|--------|
| s [Å]              | 0,227* | 0,0899 |
| error (inaccurate) |        | 0,0055 |
| N                  | 0*     | 7,79   |
| error              |        | 1,3    |
| 2s2                | 0,103* | 0,0162 |
| error              |        | 0,002  |

#### PtC\_H3PO4\_180C\_2\_Pt\_L3\_0049

| #                  | Pt-O    | Pt-Pt  | R-factor filtered |
|--------------------|---------|--------|-------------------|
| R [Å]              | 1,922*  | 2,75   | 13,98             |
| error              |         | 0,0064 |                   |
| s [Å]              | 0,205*  | 0,0877 |                   |
| error (inaccurate) |         | 0,0054 |                   |
| N                  | 0*      | 7,53   |                   |
| error              |         | 1,3    |                   |
| 2s2                | 0,0844* | 0,0154 |                   |
| error              |         | 0,0019 |                   |

#### PtC\_H3PO4\_180C\_2\_Pt\_L3\_0050

| #                  | Pt-O    | Pt-Pt  | R-factor filtered |
|--------------------|---------|--------|-------------------|
| R [Å]              | 1,929*  | 2,751  | 13,98             |
| error              |         | 0,0065 |                   |
| s [Å]              | 0,217*  | 0,0875 |                   |
| error (inaccurate) |         | 0,0055 |                   |
| N                  | 0*      | 7,5    |                   |
| error              |         | 1,3    |                   |
| 2s2                | 0,0941* | 0,0153 |                   |
| error              |         | 0,0019 |                   |

#### PtC\_H3PO4\_180C\_2\_Pt\_L3\_0051

| #                  | Pt-O   | Pt-Pt  | R-factor filtered |
|--------------------|--------|--------|-------------------|
| R [Å]              | 1,918* | 2,751  | 13,98             |
| error              |        | 0,0063 |                   |
| s [Å]              | 0,228* | 0,0858 |                   |
| error (inaccurate) |        | 0,0054 |                   |
| N                  | 0*     | 7,29   |                   |
| error              |        | 1,2    |                   |
| 2s2                | 0,104* | 0,0147 |                   |
| error              |        | 0,0019 |                   |

#### PtC\_H3PO4\_180C\_2\_Pt\_L3\_0052

| #                  | Pt-O   | Pt-Pt  | R-factor filtered |
|--------------------|--------|--------|-------------------|
| R [Å]              | 1,902* | 2,755  | 13,98             |
| error              |        | 0,0064 |                   |
| s [Å]              | 0,245* | 0,087  |                   |
| error (inaccurate) |        | 0,0055 |                   |
| N                  | 0*     | 7,34   |                   |
| error              |        | 1,3    |                   |

|       |       |        |
|-------|-------|--------|
| 2s2   | 0,12* | 0,0151 |
| error |       | 0,0019 |

#### PtC\_H3PO4\_180C\_2\_Pt\_L3\_0053

| #                  | Pt-O    | Pt-Pt  | R-factor filtered |
|--------------------|---------|--------|-------------------|
| R [Å]              | 1,93*   | 2,754  | 13,98             |
| error              |         | 0,0065 |                   |
| s [Å]              | 0,216*  | 0,0889 |                   |
| error (inaccurate) |         | 0,0055 |                   |
| N                  | 0*      | 7,75   |                   |
| error              |         | 1,3    |                   |
| 2s2                | 0,0936* | 0,0158 |                   |
| error              |         | 0,0019 |                   |

#### PtC\_H3PO4\_180C\_2\_Pt\_L3\_0054

| #                  | Pt-O   | Pt-Pt  | R-factor filtered |
|--------------------|--------|--------|-------------------|
| R [Å]              | 1,91*  | 2,751  | 13,98             |
| error              |        | 0,0065 |                   |
| s [Å]              | 0,236* | 0,0862 |                   |
| error (inaccurate) |        | 0,0055 |                   |
| N                  | 0*     | 7,23   |                   |
| error              |        | 1,2    |                   |
| 2s2                | 0,111* | 0,0149 |                   |
| error              |        | 0,0019 |                   |

#### PtC\_H3PO4\_180C\_2\_Pt\_L3\_0055

| #                  | Pt-O   | Pt-Pt  | R-factor filtered |
|--------------------|--------|--------|-------------------|
| R [Å]              | 1,897* | 2,75   | 13,98             |
| error              |        | 0,0067 |                   |
| s [Å]              | 0,242* | 0,0866 |                   |
| error (inaccurate) |        | 0,0057 |                   |
| N                  | 0*     | 7,16   |                   |
| error              |        | 1,2    |                   |
| 2s2                | 0,117* | 0,015  |                   |
| error              |        | 0,002  |                   |

#### PtC\_H3PO4\_180C\_2\_Pt\_L3\_0056

| #                  | Pt-O   | Pt-Pt  | R-factor filtered |
|--------------------|--------|--------|-------------------|
| R [Å]              | 1,914* | 2,752  | 13,98             |
| error              |        | 0,0065 |                   |
| s [Å]              | 0,234* | 0,0861 |                   |
| error (inaccurate) |        | 0,0055 |                   |
| N                  | 0*     | 7,18   |                   |
| error              |        | 1,2    |                   |
| 2s2                | 0,11*  | 0,0148 |                   |
| error              |        | 0,0019 |                   |

#### PtC\_H3PO4\_180C\_2\_Pt\_L3\_0057

| #                  | Pt-O   | Pt-Pt  | R-factor filtered |
|--------------------|--------|--------|-------------------|
| R [Å]              | 1,915* | 2,749  | 13,98             |
| error              |        | 0,0068 |                   |
| s [Å]              | 0,238* | 0,0897 |                   |
| error (inaccurate) |        | 0,0057 |                   |
| N                  | 0*     | 7,5    |                   |
| error              |        | 1,3    |                   |
| 2s2                | 0,113* | 0,0161 |                   |
| error              |        | 0,002  |                   |

#### PtC\_H3PO4\_180C\_2\_Pt\_L3\_0058

| #                  | Pt-O   | Pt-Pt  | R-factor filtered |
|--------------------|--------|--------|-------------------|
| R [Å]              | 1,912* | 2,751  | 13,98             |
| error              |        | 0,0067 |                   |
| s [Å]              | 0,227* | 0,0875 |                   |
| error (inaccurate) |        | 0,0057 |                   |
| N                  | 0*     | 7,29   |                   |
| error              |        | 1,3    |                   |
| 2s2                | 0,103* | 0,0153 |                   |
| error              |        | 0,002  |                   |

#### PtC\_H3PO4\_180C\_2\_Pt\_L3\_0059

| #                  | Pt-O    | Pt-Pt  | R-factor filtered |
|--------------------|---------|--------|-------------------|
| R [Å]              | 1,922*  | 2,754  | 15,25             |
| error              |         | 0,0064 |                   |
| s [Å]              | 0,205*  | 0,084  |                   |
| error (inaccurate) |         | 0,0057 |                   |
| N                  | 0*      | 6,83   |                   |
| error              |         | 1,2    |                   |
| 2s2                | 0,0844* | 0,0141 |                   |
| error              |         | 0,0019 |                   |

#### PtC\_H3PO4\_180C\_2\_Pt\_L3\_0060

| #                  | Pt-O    | Pt-Pt  | R-factor filtered |
|--------------------|---------|--------|-------------------|
| R [Å]              | 1,929*  | 2,753  | 15,25             |
| error              |         | 0,0065 |                   |
| s [Å]              | 0,217*  | 0,086  |                   |
| error (inaccurate) |         | 0,0056 |                   |
| N                  | 0*      | 7,2    |                   |
| error              |         | 1,2    |                   |
| 2s2                | 0,0941* | 0,0148 |                   |
| error              |         | 0,0019 |                   |

#### PtC\_H3PO4\_180C\_2\_Pt\_L3\_0061

| #     | Pt-O   | Pt-Pt  | R-factor filtered |
|-------|--------|--------|-------------------|
| R [Å] | 1,918* | 2,751  | 15,25             |
| error |        | 0,0063 |                   |
| s [Å] | 0,228* | 0,0856 |                   |

|                    |        |        |
|--------------------|--------|--------|
| error (inaccurate) |        | 0,0055 |
| N                  | 0*     | 7,21   |
| error              |        | 1,2    |
| 2s2                | 0,104* | 0,0147 |
| error              |        | 0,0019 |

#### PtC\_H3PO4\_180C\_2\_Pt\_L3\_0062

| #                  | Pt-O   | Pt-Pt  | R-factor filtered |
|--------------------|--------|--------|-------------------|
| R [Å]              | 1,902* | 2,749  | 15,25             |
| error              |        | 0,0065 |                   |
| s [Å]              | 0,245* | 0,0864 |                   |
| error (inaccurate) |        | 0,0056 |                   |
| N                  | 0*     | 7,28   |                   |
| error              |        | 1,2    |                   |
| 2s2                | 0,12*  | 0,0149 |                   |
| error              |        | 0,0019 |                   |

#### PtC\_H3PO4\_180C\_2\_Pt\_L3\_0063

| #                  | Pt-O    | Pt-Pt  | R-factor filtered |
|--------------------|---------|--------|-------------------|
| R [Å]              | 1,93*   | 2,748  | 15,25             |
| error              |         | 0,0066 |                   |
| s [Å]              | 0,216*  | 0,088  |                   |
| error (inaccurate) |         | 0,0055 |                   |
| N                  | 0*      | 7,48   |                   |
| error              |         | 1,3    |                   |
| 2s2                | 0,0936* | 0,0155 |                   |
| error              |         | 0,0019 |                   |

#### PtC\_H3PO4\_180C\_2\_Pt\_L3\_0064

| #                  | Pt-O   | Pt-Pt  | R-factor filtered |
|--------------------|--------|--------|-------------------|
| R [Å]              | 1,91*  | 2,75   | 15,25             |
| error              |        | 0,0067 |                   |
| s [Å]              | 0,236* | 0,0891 |                   |
| error (inaccurate) |        | 0,0056 |                   |
| N                  | 0*     | 7,63   |                   |
| error              |        | 1,3    |                   |
| 2s2                | 0,111* | 0,0159 |                   |
| error              |        | 0,002  |                   |

#### PtC\_H3PO4\_180C\_2\_Pt\_L3\_0065

| #                  | Pt-O   | Pt-Pt  | R-factor filtered |
|--------------------|--------|--------|-------------------|
| R [Å]              | 1,897* | 2,759  | 15,25             |
| error              |        | 0,0064 |                   |
| s [Å]              | 0,242* | 0,0875 |                   |
| error (inaccurate) |        | 0,0056 |                   |
| N                  | 0*     | 7,34   |                   |
| error              |        | 1,3    |                   |
| 2s2                | 0,117* | 0,0153 |                   |

|       |        |
|-------|--------|
| error | 0,0019 |
|-------|--------|

PtC\_H3PO4\_180C\_2\_Pt\_L3\_0066

|                    |        |        |                   |
|--------------------|--------|--------|-------------------|
| #                  | Pt-O   | Pt-Pt  | R-factor filtered |
| R [Å]              | 1,914* | 2,752  | 15,25             |
| error              |        | 0,0062 |                   |
| s [Å]              | 0,234* | 0,0866 |                   |
| error (inaccurate) |        | 0,0053 |                   |
| N                  | 0*     | 7,63   |                   |
| error              |        | 1,2    |                   |
| 2s2                | 0,11*  | 0,015  |                   |
| error              |        | 0,0018 |                   |



| Sample                    | Time (min) |     |
|---------------------------|------------|-----|
| PtC_dry_180C_Pt_L3        | 0          | 0   |
|                           | 0          | 0   |
| PtC_H3PO4_180C_Pt_L3_0000 |            | 3   |
| PtC_H3PO4_180C_Pt_L3_0001 |            | 6   |
| PtC_H3PO4_180C_Pt_L3_0002 |            | 9   |
| PtC_H3PO4_180C_Pt_L3_0003 |            | 12  |
| PtC_H3PO4_180C_Pt_L3_0004 |            | 15  |
| PtC_H3PO4_180C_Pt_L3_0005 |            | 18  |
| PtC_H3PO4_180C_Pt_L3_0006 |            | 21  |
| PtC_H3PO4_180C_Pt_L3_0007 |            | 24  |
| PtC_H3PO4_180C_Pt_L3_0008 |            | 27  |
| PtC_H3PO4_180C_Pt_L3_0009 |            | 30  |
| PtC_H3PO4_180C_Pt_L3_0010 |            | 33  |
| PtC_H3PO4_180C_Pt_L3_0011 |            | 36  |
| PtC_H3PO4_180C_Pt_L3_0012 |            | 39  |
| PtC_H3PO4_180C_Pt_L3_0013 |            | 42  |
| PtC_H3PO4_180C_Pt_L3_0014 |            | 45  |
| PtC_H3PO4_180C_Pt_L3_0015 |            | 48  |
| PtC_H3PO4_180C_Pt_L3_0016 |            | 51  |
| PtC_H3PO4_180C_Pt_L3_0017 |            | 54  |
| PtC_H3PO4_180C_Pt_L3_0018 |            | 57  |
| PtC_H3PO4_180C_Pt_L3_0019 |            | 60  |
| PtC_H3PO4_180C_Pt_L3_0020 |            | 63  |
| PtC_H3PO4_180C_Pt_L3_0021 |            | 66  |
| PtC_H3PO4_180C_Pt_L3_0022 |            | 69  |
| PtC_H3PO4_180C_Pt_L3_0023 |            | 72  |
| PtC_H3PO4_180C_Pt_L3_0024 |            | 75  |
| PtC_H3PO4_180C_Pt_L3_0025 |            | 78  |
| PtC_H3PO4_180C_Pt_L3_0026 |            | 81  |
| PtC_H3PO4_180C_Pt_L3_0027 |            | 84  |
| PtC_H3PO4_180C_Pt_L3_0028 |            | 87  |
| PtC_H3PO4_180C_Pt_L3_0029 |            | 90  |
| PtC_H3PO4_180C_Pt_L3_0030 |            | 93  |
| PtC_H3PO4_180C_Pt_L3_0031 |            | 96  |
| PtC_H3PO4_180C_Pt_L3_0032 |            | 99  |
| PtC_H3PO4_180C_Pt_L3_0033 |            | 102 |
| PtC_H3PO4_180C_Pt_L3_0034 |            | 105 |
| PtC_H3PO4_180C_Pt_L3_0035 |            | 108 |
| PtC_H3PO4_180C_Pt_L3_0036 |            | 111 |
| PtC_H3PO4_180C_Pt_L3_0037 |            | 114 |
| PtC_H3PO4_180C_Pt_L3_0038 |            | 117 |
| PtC_H3PO4_180C_Pt_L3_0039 |            | 120 |
| PtC_H3PO4_180C_Pt_L3_0040 |            | 123 |
| PtC_H3PO4_180C_Pt_L3_0041 |            | 126 |
| PtC_H3PO4_180C_Pt_L3_0042 |            | 129 |
| PtC_H3PO4_180C_Pt_L3_0043 |            | 132 |

|                           |     |
|---------------------------|-----|
| PtC_H3PO4_180C_Pt_L3_0044 | 135 |
| PtC_H3PO4_180C_Pt_L3_0045 | 138 |
| PtC_H3PO4_180C_Pt_L3_0046 | 141 |
| PtC_H3PO4_180C_Pt_L3_0047 | 144 |
| PtC_H3PO4_180C_Pt_L3_0048 | 147 |
| PtC_H3PO4_180C_Pt_L3_0049 | 150 |
| PtC_H3PO4_180C_Pt_L3_0050 | 153 |
| PtC_H3PO4_180C_Pt_L3_0051 | 156 |
| PtC_H3PO4_180C_Pt_L3_0052 | 159 |
| PtC_H3PO4_180C_Pt_L3_0053 | 162 |
| PtC_H3PO4_180C_Pt_L3_0054 | 165 |
| PtC_H3PO4_180C_Pt_L3_0055 | 168 |
| PtC_H3PO4_180C_Pt_L3_0056 | 171 |
| PtC_H3PO4_180C_Pt_L3_0057 | 174 |
| PtC_H3PO4_180C_Pt_L3_0058 | 177 |
| PtC_H3PO4_180C_Pt_L3_0059 | 180 |
| PtC_H3PO4_180C_Pt_L3_0060 | 183 |
| PtC_H3PO4_180C_Pt_L3_0061 | 186 |
| PtC_H3PO4_180C_Pt_L3_0062 | 189 |
| PtC_H3PO4_180C_Pt_L3_0063 | 192 |
| PtC_H3PO4_180C_Pt_L3_0064 | 195 |
| PtC_H3PO4_180C_Pt_L3_0065 | 198 |
| PtC_H3PO4_180C_Pt_L3_0066 | 201 |
| PtC_H3PO4_180C_Pt_L3_0067 | 204 |
| PtC_H3PO4_180C_Pt_L3_0068 | 207 |
| PtC_H3PO4_180C_Pt_L3_0069 | 210 |
| PtC_H3PO4_180C_Pt_L3_0070 | 213 |
| PtC_H3PO4_180C_Pt_L3_0071 | 216 |
| PtC_H3PO4_180C_Pt_L3_0072 | 219 |
| PtC_H3PO4_180C_Pt_L3_0073 | 222 |
| PtC_H3PO4_180C_Pt_L3_0074 | 225 |
| PtC_H3PO4_180C_Pt_L3_0075 | 228 |
| PtC_H3PO4_180C_Pt_L3_0076 | 231 |
| PtC_H3PO4_180C_Pt_L3_0077 | 234 |
| PtC_H3PO4_180C_Pt_L3_0078 | 237 |
| PtC_H3PO4_180C_Pt_L3_0079 | 240 |

PtC\_dry\_180C\_Pt\_L3

S02 = 0,92457225

| #                  | Pt-O  | Pt-Pt  | R-factor filtered |
|--------------------|-------|--------|-------------------|
| R [Å]              | 2,011 | 2,744  | 12,21             |
| error              | 0,034 | 0,012  |                   |
| s [Å]              | 0,107 | 0,0971 |                   |
| error (inaccurate) | 0,034 | 0,01   |                   |
| N                  | 1,69  | 5,06   |                   |
| error              | 0,71  | 1,6    |                   |
| 2s2                | 0,023 | 0,019  |                   |
| error              | 0,014 | 0,004  |                   |

PtC\_H3PO4\_180C\_Pt\_L3\_0000

| #                  | Pt-O   | Pt-Pt  | R-factor filtered |
|--------------------|--------|--------|-------------------|
| R [Å]              | 1,93*  | 2,752  | 14,61             |
| error              |        | 0,0075 |                   |
| s [Å]              | 0,228* | 0,0924 |                   |
| error (inaccurate) |        | 0,0059 |                   |
| N                  | 0*     | 7,77   |                   |
| error              |        | 1,4    |                   |
| 2s2                | 0,104* | 0,0171 |                   |
| error              |        | 0,0022 |                   |

PtC\_H3PO4\_180C\_Pt\_L3\_0001

| #                  | Pt-O    | Pt-Pt    | R-factor filtered |
|--------------------|---------|----------|-------------------|
| R [Å]              | 1,941*  | 2,748    | 14,61             |
| error              |         | 0,0073   |                   |
| s [Å]              | 0,219*  | 0,0918   |                   |
| error (inaccurate) |         | 0,0058   |                   |
| N                  | 0*      | 7,83     |                   |
| error              |         | 1,4      |                   |
| 2s2                | 0,0962* | 1,69E-02 |                   |
| error              |         | 0,0021   |                   |

PtC\_H3PO4\_180C\_Pt\_L3\_0002

| #     | Pt-O   | Pt-Pt  | R-factor filtered |
|-------|--------|--------|-------------------|
| R [Å] | 1,919* | 2,746  | 14,61             |
| error |        | 0,0072 |                   |

|                    |        |        |
|--------------------|--------|--------|
| s [Å]              | 0,234* | 0,0891 |
| error (inaccurate) |        | 0,0057 |
| N                  | 0*     | 7,43   |
| error              |        | 1,3    |
| 2s2                | 0,109* | 0,0159 |
| error              |        | 0,002  |

#### PtC\_H3PO4\_180C\_Pt\_L3\_0003

| #                  | Pt-O   | Pt-Pt  | R-factor filtered |
|--------------------|--------|--------|-------------------|
| R [Å]              | 1,926* | 2,752  | 14,61             |
| error              |        | 0,0069 |                   |
| s [Å]              | 0,231* | 0,0869 |                   |
| error (inaccurate) |        | 0,0057 |                   |
| N                  | 0*     | 7,32   |                   |
| error              |        | 1,3    |                   |
| 2s2                | 0,107* | 0,0151 |                   |
| error              |        | 0,002  |                   |

#### PtC\_H3PO4\_180C\_Pt\_L3\_0004

| #                  | Pt-O    | Pt-Pt  | R-factor filtered |
|--------------------|---------|--------|-------------------|
| R [Å]              | 1,926*  | 2,749  | 14,61             |
| error              |         | 0,0072 |                   |
| s [Å]              | 0,223*  | 0,0921 |                   |
| error (inaccurate) |         | 0,0057 |                   |
| N                  | 0*      | 8,01   |                   |
| error              |         | 1,4    |                   |
| 2s2                | 0,0997* | 0,017  |                   |
| error              |         | 0,0021 |                   |

#### PtC\_H3PO4\_180C\_Pt\_L3\_0005

| #                  | Pt-O    | Pt-Pt  | R-factor filtered |
|--------------------|---------|--------|-------------------|
| R [Å]              | 1,927*  | 2,75   | 14,61             |
| error              |         | 0,0069 |                   |
| s [Å]              | 0,221*  | 0,0884 |                   |
| error (inaccurate) |         | 0,0056 |                   |
| N                  | 0*      | 7,59   |                   |
| error              |         | 1,3    |                   |
| 2s2                | 0,0973* | 0,0156 |                   |
| error              |         | 0,002  |                   |

#### PtC\_H3PO4\_180C\_Pt\_L3\_0006

| #                  | Pt-O   | Pt-Pt  | R-factor filtered |
|--------------------|--------|--------|-------------------|
| R [Å]              | 1,916* | 2,752  | 14,61             |
| error              |        | 0,0071 |                   |
| s [Å]              | 0,226* | 0,0881 |                   |
| error (inaccurate) |        | 0,0058 |                   |
| N                  | 0*     | 7,33   |                   |
| error              |        | 1,3    |                   |

|       |        |        |
|-------|--------|--------|
| 2s2   | 0,103* | 0,0155 |
| error |        | 0,002  |

#### PtC\_H3PO4\_180C\_Pt\_L3\_0007

| #                  | Pt-O    | Pt-Pt  | R-factor filtered |
|--------------------|---------|--------|-------------------|
| R [Å]              | 1,924*  | 2,754  | 14,61             |
| error              |         | 0,0072 |                   |
| s [Å]              | 0,222*  | 0,0896 |                   |
| error (inaccurate) |         | 0,0058 |                   |
| N                  | 0*      | 7,42   |                   |
| error              |         | 1,4    |                   |
| 2s2                | 0,0989* | 0,0161 |                   |
| error              |         | 0,0021 |                   |

#### PtC\_H3PO4\_180C\_Pt\_L3\_0008

| #                  | Pt-O    | Pt-Pt  | R-factor filtered |
|--------------------|---------|--------|-------------------|
| R [Å]              | 1,918*  | 2,752  | 14,61             |
| error              |         | 0,0072 |                   |
| s [Å]              | 0,221*  | 0,0879 |                   |
| error (inaccurate) |         | 0,0058 |                   |
| N                  | 0*      | 7,18   |                   |
| error              |         | 1,3    |                   |
| 2s2                | 0,0973* | 0,0155 |                   |
| error              |         | 0,0021 |                   |

#### PtC\_H3PO4\_180C\_Pt\_L3\_0009

| #                  | Pt-O   | Pt-Pt  | R-factor filtered |
|--------------------|--------|--------|-------------------|
| R [Å]              | 1,907* | 2,75   | 14,61             |
| error              |        | 0,0073 |                   |
| s [Å]              | 0,232* | 0,0899 |                   |
| error (inaccurate) |        | 0,0059 |                   |
| N                  | 0*     | 7,53   |                   |
| error              |        | 1,4    |                   |
| 2s2                | 0,107* | 0,0162 |                   |
| error              |        | 0,0021 |                   |

#### PtC\_H3PO4\_180C\_Pt\_L3\_0010

| #                  | Pt-O   | Pt-Pt  | R-factor filtered |
|--------------------|--------|--------|-------------------|
| R [Å]              | 1,905* | 2,748  | 14,61             |
| error              |        | 0,0072 |                   |
| s [Å]              | 0,238* | 0,0874 |                   |
| error (inaccurate) |        | 0,0059 |                   |
| N                  | 0*     | 7,07   |                   |
| error              |        | 1,3    |                   |
| 2s2                | 0,114* | 0,0153 |                   |
| error              |        | 0,002  |                   |

#### PtC\_H3PO4\_180C\_Pt\_L3\_0011

| #                  | Pt-O    | Pt-Pt  | R-factor filtered |
|--------------------|---------|--------|-------------------|
| R [Å]              | 1,922*  | 2,754  | 15,85             |
| error              |         | 0,0071 |                   |
| s [Å]              | 0,205*  | 0,0865 |                   |
| error (inaccurate) |         | 0,0059 |                   |
| N                  | 0*      | 6,98   |                   |
| error              |         | 1,3    |                   |
| 2s2                | 0,0844* | 0,015  |                   |
| error              |         | 0,002  |                   |

#### PtC\_H3PO4\_180C\_Pt\_L3\_0012

| #                  | Pt-O    | Pt-Pt  | R-factor filtered |
|--------------------|---------|--------|-------------------|
| R [Å]              | 1,929*  | 2,747  | 15,85             |
| error              |         | 0,0072 |                   |
| s [Å]              | 0,217*  | 0,0919 |                   |
| error (inaccurate) |         | 0,0056 |                   |
| N                  | 0*      | 8,01   |                   |
| error              |         | 1,4    |                   |
| 2s2                | 0,0941* | 0,0169 |                   |
| error              |         | 0,0021 |                   |

#### PtC\_H3PO4\_180C\_Pt\_L3\_0013

| #                  | Pt-O   | Pt-Pt  | R-factor filtered |
|--------------------|--------|--------|-------------------|
| R [Å]              | 1,918* | 2,746  | 15,85             |
| error              |        | 0,007  |                   |
| s [Å]              | 0,228* | 0,0903 |                   |
| error (inaccurate) |        | 0,0056 |                   |
| N                  | 0*     | 7,84   |                   |
| error              |        | 1,4    |                   |
| 2s2                | 0,104* | 0,0163 |                   |
| error              |        | 0,002  |                   |

#### PtC\_H3PO4\_180C\_Pt\_L3\_0014

| #                  | Pt-O   | Pt-Pt  | R-factor filtered |
|--------------------|--------|--------|-------------------|
| R [Å]              | 1,902* | 2,748  | 15,85             |
| error              |        | 0,0073 |                   |
| s [Å]              | 0,245* | 0,0879 |                   |
| error (inaccurate) |        | 0,0059 |                   |
| N                  | 0*     | 7,12   |                   |
| error              |        | 1,3    |                   |
| 2s2                | 0,12*  | 0,0155 |                   |
| error              |        | 0,0021 |                   |

#### PtC\_H3PO4\_180C\_Pt\_L3\_0015

| #     | Pt-O   | Pt-Pt  | R-factor filtered |
|-------|--------|--------|-------------------|
| R [Å] | 1,93*  | 2,753  | 15,85             |
| error |        | 0,0069 |                   |
| s [Å] | 0,216* | 0,0901 |                   |

|                    |         |        |
|--------------------|---------|--------|
| error (inaccurate) |         | 0,0055 |
| N                  | 0*      | 7,95   |
| error              |         | 1,4    |
| 2s2                | 0,0936* | 0,0162 |
| error              |         | 0,002  |

#### PtC\_H3PO4\_180C\_Pt\_L3\_0016

| #                  | Pt-O   | Pt-Pt  | R-factor filtered |
|--------------------|--------|--------|-------------------|
| R [Å]              | 1,91*  | 2,751  | 15,85             |
| error              |        | 0,0072 |                   |
| s [Å]              | 0,236* | 0,0916 |                   |
| error (inaccurate) |        | 0,0058 |                   |
| N                  | 0*     | 7,9    |                   |
| error              |        | 1,4    |                   |
| 2s2                | 0,111* | 0,0168 |                   |
| error              |        | 0,0021 |                   |

#### PtC\_H3PO4\_180C\_Pt\_L3\_0017

| #                  | Pt-O   | Pt-Pt  | R-factor filtered |
|--------------------|--------|--------|-------------------|
| R [Å]              | 1,897* | 2,751  | 15,85             |
| error              |        | 0,0069 |                   |
| s [Å]              | 0,242* | 0,0884 |                   |
| error (inaccurate) |        | 0,0056 |                   |
| N                  | 0*     | 7,51   |                   |
| error              |        | 1,3    |                   |
| 2s2                | 0,117* | 0,0156 |                   |
| error              |        | 0,002  |                   |

#### PtC\_H3PO4\_180C\_Pt\_L3\_0018

| #                  | Pt-O   | Pt-Pt  | R-factor filtered |
|--------------------|--------|--------|-------------------|
| R [Å]              | 1,914* | 2,751  | 15,85             |
| error              |        | 0,007  |                   |
| s [Å]              | 0,234* | 0,088  |                   |
| error (inaccurate) |        | 0,0057 |                   |
| N                  | 0*     | 7,36   |                   |
| error              |        | 1,3    |                   |
| 2s2                | 0,11*  | 0,0155 |                   |
| error              |        | 0,002  |                   |

#### PtC\_H3PO4\_180C\_Pt\_L3\_0019

| #                  | Pt-O   | Pt-Pt  | R-factor filtered |
|--------------------|--------|--------|-------------------|
| R [Å]              | 1,915* | 2,749  | 15,85             |
| error              |        | 0,0071 |                   |
| s [Å]              | 0,238* | 0,094  |                   |
| error (inaccurate) |        | 0,0056 |                   |
| N                  | 0*     | 8,53   |                   |
| error              |        | 1,5    |                   |
| 2s2                | 0,113* | 0,0177 |                   |

error 0,0021

PtC\_H3PO4\_180C\_Pt\_L3\_0020

| #                  | Pt-O   | Pt-Pt  | R-factor filtered |
|--------------------|--------|--------|-------------------|
| R [Å]              | 1,912* | 2,753  | 15,85             |
| error              |        | 0,007  |                   |
| s [Å]              | 0,227* | 0,0896 |                   |
| error (inaccurate) |        | 0,0057 |                   |
| N                  | 0*     | 7,63   |                   |
| error              |        | 1,3    |                   |
| 2s2                | 0,103* | 0,016  |                   |
| error              |        | 0,002  |                   |

PtC\_H3PO4\_180C\_Pt\_L3\_0021

| #                  | Pt-O    | Pt-Pt  | R-factor filtered |
|--------------------|---------|--------|-------------------|
| R [Å]              | 1,922*  | 2,749  | 14,56             |
| error              |         | 0,0069 |                   |
| s [Å]              | 0,205*  | 0,0894 |                   |
| error (inaccurate) |         | 0,0056 |                   |
| N                  | 0*      | 7,7    |                   |
| error              |         | 1,3    |                   |
| 2s2                | 0,0844* | 0,016  |                   |
| error              |         | 0,002  |                   |

PtC\_H3PO4\_180C\_Pt\_L3\_0022

| #                  | Pt-O    | Pt-Pt  | R-factor filtered |
|--------------------|---------|--------|-------------------|
| R [Å]              | 1,929*  | 2,75   | 14,56             |
| error              |         | 0,0071 |                   |
| s [Å]              | 0,217*  | 0,0922 |                   |
| error (inaccurate) |         | 0,0056 |                   |
| N                  | 0*      | 8,17   |                   |
| error              |         | 1,4    |                   |
| 2s2                | 0,0941* | 0,017  |                   |
| error              |         | 0,0021 |                   |

PtC\_H3PO4\_180C\_Pt\_L3\_0023

| #                  | Pt-O   | Pt-Pt  | R-factor filtered |
|--------------------|--------|--------|-------------------|
| R [Å]              | 1,918* | 2,751  | 14,56             |
| error              |        | 0,007  |                   |
| s [Å]              | 0,228* | 0,0888 |                   |
| error (inaccurate) |        | 0,0057 |                   |
| N                  | 0*     | 7,5    |                   |
| error              |        | 1,3    |                   |
| 2s2                | 0,104* | 0,0158 |                   |
| error              |        | 0,002  |                   |

PtC\_H3PO4\_180C\_Pt\_L3\_0024

| # | Pt-O | Pt-Pt | R-factor filtered |
|---|------|-------|-------------------|
|---|------|-------|-------------------|



|                    |        |        |       |
|--------------------|--------|--------|-------|
| R [Å]              | 1,902* | 2,752  | 14,56 |
| error              |        | 0,0071 |       |
| s [Å]              | 0,245* | 0,0888 |       |
| error (inaccurate) |        | 0,0058 |       |
| N                  | 0*     | 7,42   |       |
| error              |        | 1,3    |       |
| 2s2                | 0,12*  | 0,0158 |       |
| error              |        | 0,0021 |       |

#### PtC\_H3PO4\_180C\_Pt\_L3\_0025

| #                  | Pt-O    | Pt-Pt  | R-factor filtered |
|--------------------|---------|--------|-------------------|
| R [Å]              | 1,93*   | 2,751  | 14,56             |
| error              |         | 0,0071 |                   |
| s [Å]              | 0,216*  | 0,0886 |                   |
| error (inaccurate) |         | 0,0057 |                   |
| N                  | 0*      | 7,42   |                   |
| error              |         | 1,3    |                   |
| 2s2                | 0,0936* | 0,0157 |                   |
| error              |         | 0,002  |                   |

#### PtC\_H3PO4\_180C\_Pt\_L3\_0026

| #                  | Pt-O   | Pt-Pt  | R-factor filtered |
|--------------------|--------|--------|-------------------|
| R [Å]              | 1,91*  | 2,751  | 14,56             |
| error              |        | 0,0068 |                   |
| s [Å]              | 0,236* | 0,0872 |                   |
| error (inaccurate) |        | 0,0055 |                   |
| N                  | 0*     | 7,48   |                   |
| error              |        | 1,3    |                   |
| 2s2                | 0,111* | 0,0152 |                   |
| error              |        | 0,0019 |                   |

#### PtC\_H3PO4\_180C\_Pt\_L3\_0027

| #                  | Pt-O   | Pt-Pt  | R-factor filtered |
|--------------------|--------|--------|-------------------|
| R [Å]              | 1,897* | 2,75   | 14,56             |
| error              |        | 0,0073 |                   |
| s [Å]              | 0,242* | 0,0902 |                   |
| error (inaccurate) |        | 0,0058 |                   |
| N                  | 0*     | 7,52   |                   |
| error              |        | 1,4    |                   |
| 2s2                | 0,117* | 0,0163 |                   |
| error              |        | 0,0021 |                   |

#### PtC\_H3PO4\_180C\_Pt\_L3\_0028

| #                  | Pt-O   | Pt-Pt  | R-factor filtered |
|--------------------|--------|--------|-------------------|
| R [Å]              | 1,914* | 2,751  | 14,56             |
| error              |        | 0,0069 |                   |
| s [Å]              | 0,234* | 0,0852 |                   |
| error (inaccurate) |        | 0,0057 |                   |

|       |       |        |
|-------|-------|--------|
| N     | 0*    | 6,98   |
| error |       | 1,2    |
| 2s2   | 0,11* | 0,0145 |
| error |       | 0,0019 |

#### PtC\_H3PO4\_180C\_Pt\_L3\_0029

| #                  | Pt-O   | Pt-Pt  | R-factor filtered |
|--------------------|--------|--------|-------------------|
| R [Å]              | 1,915* | 2,758  | 14,56             |
| error              |        | 0,0068 |                   |
| s [Å]              | 0,238* | 0,0891 |                   |
| error (inaccurate) |        | 0,0055 |                   |
| N                  | 0*     | 7,83   |                   |
| error              |        | 1,3    |                   |
| 2s2                | 0,113* | 0,0159 |                   |
| error              |        | 0,002  |                   |

#### PtC\_H3PO4\_180C\_Pt\_L3\_0030

| #                  | Pt-O   | Pt-Pt  | R-factor filtered |
|--------------------|--------|--------|-------------------|
| R [Å]              | 1,912* | 2,754  | 14,56             |
| error              |        | 0,0069 |                   |
| s [Å]              | 0,227* | 0,0885 |                   |
| error (inaccurate) |        | 0,0056 |                   |
| N                  | 0*     | 7,52   |                   |
| error              |        | 1,3    |                   |
| 2s2                | 0,103* | 0,0157 |                   |
| error              |        | 0,002  |                   |

#### PtC\_H3PO4\_180C\_Pt\_L3\_0031

| #                  | Pt-O    | Pt-Pt  | R-factor filtered |
|--------------------|---------|--------|-------------------|
| R [Å]              | 1,922*  | 2,755  | 13,63             |
| error              |         | 0,0069 |                   |
| s [Å]              | 0,205*  | 0,0888 |                   |
| error (inaccurate) |         | 0,0057 |                   |
| N                  | 0*      | 7,53   |                   |
| error              |         | 1,3    |                   |
| 2s2                | 0,0844* | 0,0158 |                   |
| error              |         | 0,002  |                   |

#### PtC\_H3PO4\_180C\_Pt\_L3\_0032

| #                  | Pt-O    | Pt-Pt  | R-factor filtered |
|--------------------|---------|--------|-------------------|
| R [Å]              | 1,929*  | 2,748  | 13,63             |
| error              |         | 0,0069 |                   |
| s [Å]              | 0,217*  | 0,0862 |                   |
| error (inaccurate) |         | 0,0057 |                   |
| N                  | 0*      | 7,19   |                   |
| error              |         | 1,3    |                   |
| 2s2                | 0,0941* | 0,0149 |                   |
| error              |         | 0,002  |                   |

## PtC\_H3PO4\_180C\_Pt\_L3\_0033

| #                  | Pt-O   | Pt-Pt  | R-factor filtered |
|--------------------|--------|--------|-------------------|
| R [Å]              | 1,918* | 2,751  | 13,63             |
| error              |        | 0,0071 |                   |
| s [Å]              | 0,228* | 0,085  |                   |
| error (inaccurate) |        | 0,0059 |                   |
| N                  | 0*     | 6,75   |                   |
| error              |        | 1,2    |                   |
| 2s2                | 0,104* | 0,0145 |                   |
| error              |        | 0,002  |                   |

## PtC\_H3PO4\_180C\_Pt\_L3\_0034

| #                  | Pt-O   | Pt-Pt  | R-factor filtered |
|--------------------|--------|--------|-------------------|
| R [Å]              | 1,902* | 2,75   | 13,63             |
| error              |        | 0,0067 |                   |
| s [Å]              | 0,245* | 0,0867 |                   |
| error (inaccurate) |        | 0,0055 |                   |
| N                  | 0*     | 7,41   |                   |
| error              |        | 1,3    |                   |
| 2s2                | 0,12*  | 0,015  |                   |
| error              |        | 0,0019 |                   |

## PtC\_H3PO4\_180C\_Pt\_L3\_0035

| #                  | Pt-O    | Pt-Pt  | R-factor filtered |
|--------------------|---------|--------|-------------------|
| R [Å]              | 1,93*   | 2,752  | 13,63             |
| error              |         | 0,0069 |                   |
| s [Å]              | 0,216*  | 0,0888 |                   |
| error (inaccurate) |         | 0,0056 |                   |
| N                  | 0*      | 7,64   |                   |
| error              |         | 1,3    |                   |
| 2s2                | 0,0936* | 0,0158 |                   |
| error              |         | 0,002  |                   |

## PtC\_H3PO4\_180C\_Pt\_L3\_0036

| #                  | Pt-O   | Pt-Pt  | R-factor filtered |
|--------------------|--------|--------|-------------------|
| R [Å]              | 1,91*  | 2,751  | 13,63             |
| error              |        | 0,0069 |                   |
| s [Å]              | 0,236* | 0,0879 |                   |
| error (inaccurate) |        | 0,0056 |                   |
| N                  | 0*     | 7,44   |                   |
| error              |        | 1,3    |                   |
| 2s2                | 0,111* | 0,0154 |                   |
| error              |        | 0,002  |                   |

## PtC\_H3PO4\_180C\_Pt\_L3\_0037

| #     | Pt-O   | Pt-Pt | R-factor filtered |
|-------|--------|-------|-------------------|
| R [Å] | 1,897* | 2,754 | 13,63             |

|                    |        |        |
|--------------------|--------|--------|
| error              |        | 0,0069 |
| s [Å]              | 0,242* | 0,0863 |
| error (inaccurate) |        | 0,0058 |
| N                  | 0*     | 7,05   |
| error              |        | 1,3    |
| 2s2                | 0,117* | 0,0149 |
| error              |        | 0,002  |

#### PtC\_H3PO4\_180C\_Pt\_L3\_0038

| #                  | Pt-O   | Pt-Pt  | R-factor filtered |
|--------------------|--------|--------|-------------------|
| R [Å]              | 1,914* | 2,749  | 13,63             |
| error              |        | 0,007  |                   |
| s [Å]              | 0,234* | 0,0864 |                   |
| error (inaccurate) |        | 0,0058 |                   |
| N                  | 0*     | 7,08   |                   |
| error              |        | 1,3    |                   |
| 2s2                | 0,11*  | 0,0149 |                   |
| error              |        | 0,002  |                   |

#### PtC\_H3PO4\_180C\_Pt\_L3\_0039

| #                  | Pt-O   | Pt-Pt  | R-factor filtered |
|--------------------|--------|--------|-------------------|
| R [Å]              | 1,915* | 2,747  | 13,63             |
| error              |        | 0,0069 |                   |
| s [Å]              | 0,238* | 0,0858 |                   |
| error (inaccurate) |        | 0,0057 |                   |
| N                  | 0*     | 7,13   |                   |
| error              |        | 1,3    |                   |
| 2s2                | 0,113* | 0,0147 |                   |
| error              |        | 0,002  |                   |

#### PtC\_H3PO4\_180C\_Pt\_L3\_0040

| #                  | Pt-O   | Pt-Pt  | R-factor filtered |
|--------------------|--------|--------|-------------------|
| R [Å]              | 1,912* | 2,752  | 13,63             |
| error              |        | 0,0069 |                   |
| s [Å]              | 0,227* | 0,0881 |                   |
| error (inaccurate) |        | 0,0056 |                   |
| N                  | 0*     | 7,47   |                   |
| error              |        | 1,3    |                   |
| 2s2                | 0,103* | 0,0155 |                   |
| error              |        | 0,002  |                   |

#### PtC\_H3PO4\_180C\_Pt\_L3\_0041

| #                  | Pt-O   | Pt-Pt  | R-factor filtered |
|--------------------|--------|--------|-------------------|
| R [Å]              | 1,922* | 2,751  | 14,32             |
| error              |        | 0,007  |                   |
| s [Å]              | 0,205* | 0,0882 |                   |
| error (inaccurate) |        | 0,0057 |                   |
| N                  | 0*     | 7,47   |                   |

|       |         |        |
|-------|---------|--------|
| error |         | 1,3    |
| 2s2   | 0,0844* | 0,0156 |
| error |         | 0,002  |

#### PtC\_H3PO4\_180C\_Pt\_L3\_0042

| #                  | Pt-O    | Pt-Pt  | R-factor filtered |
|--------------------|---------|--------|-------------------|
| R [Å]              | 1,929*  | 2,754  | 14,32             |
| error              |         | 0,0069 |                   |
| s [Å]              | 0,217*  | 0,0903 |                   |
| error (inaccurate) |         | 0,0056 |                   |
| N                  | 0*      | 7,85   |                   |
| error              |         | 1,4    |                   |
| 2s2                | 0,0941* | 0,0163 |                   |
| error              |         | 0,002  |                   |

#### PtC\_H3PO4\_180C\_Pt\_L3\_0043

| #                  | Pt-O   | Pt-Pt  | R-factor filtered |
|--------------------|--------|--------|-------------------|
| R [Å]              | 1,918* | 2,748  | 14,32             |
| error              |        | 0,0066 |                   |
| s [Å]              | 0,228* | 0,0847 |                   |
| error (inaccurate) |        | 0,0054 |                   |
| N                  | 0*     | 7,24   |                   |
| error              |        | 1,2    |                   |
| 2s2                | 0,104* | 0,0144 |                   |
| error              |        | 0,0018 |                   |

#### PtC\_H3PO4\_180C\_Pt\_L3\_0044

| #                  | Pt-O   | Pt-Pt  | R-factor filtered |
|--------------------|--------|--------|-------------------|
| R [Å]              | 1,902* | 2,751  | 14,32             |
| error              |        | 0,0067 |                   |
| s [Å]              | 0,245* | 0,0857 |                   |
| error (inaccurate) |        | 0,0056 |                   |
| N                  | 0*     | 7,19   |                   |
| error              |        | 1,2    |                   |
| 2s2                | 0,12*  | 0,0147 |                   |
| error              |        | 0,0019 |                   |

#### PtC\_H3PO4\_180C\_Pt\_L3\_0045

| #                  | Pt-O    | Pt-Pt  | R-factor filtered |
|--------------------|---------|--------|-------------------|
| R [Å]              | 1,93*   | 2,747  | 14,32             |
| error              |         | 0,0068 |                   |
| s [Å]              | 0,216*  | 0,0869 |                   |
| error (inaccurate) |         | 0,0056 |                   |
| N                  | 0*      | 7,37   |                   |
| error              |         | 1,3    |                   |
| 2s2                | 0,0936* | 0,0151 |                   |
| error              |         | 0,0019 |                   |

## PtC\_H3PO4\_180C\_Pt\_L3\_0046

| #                  | Pt-O   | Pt-Pt  | R-factor filtered |
|--------------------|--------|--------|-------------------|
| R [Å]              | 1,91*  | 2,75   | 14,32             |
| error              |        | 0,0068 |                   |
| s [Å]              | 0,236* | 0,0873 |                   |
| error (inaccurate) |        | 0,0056 |                   |
| N                  | 0*     | 7,44   |                   |
| error              |        | 1,3    |                   |
| 2s2                | 0,111* | 0,0153 |                   |
| error              |        | 0,0019 |                   |

## PtC\_H3PO4\_180C\_Pt\_L3\_0047

| #                  | Pt-O   | Pt-Pt  | R-factor filtered |
|--------------------|--------|--------|-------------------|
| R [Å]              | 1,897* | 2,747  | 14,32             |
| error              |        | 0,0068 |                   |
| s [Å]              | 0,242* | 0,0872 |                   |
| error (inaccurate) |        | 0,0056 |                   |
| N                  | 0*     | 7,34   |                   |
| error              |        | 1,3    |                   |
| 2s2                | 0,117* | 0,0152 |                   |
| error              |        | 0,002  |                   |

## PtC\_H3PO4\_180C\_Pt\_L3\_0048

| #                  | Pt-O   | Pt-Pt  | R-factor filtered |
|--------------------|--------|--------|-------------------|
| R [Å]              | 1,914* | 2,749  | 14,32             |
| error              |        | 0,0069 |                   |
| s [Å]              | 0,234* | 0,0853 |                   |
| error (inaccurate) |        | 0,0057 |                   |
| N                  | 0*     | 7,02   |                   |
| error              |        | 1,2    |                   |
| 2s2                | 0,11*  | 0,0145 |                   |
| error              |        | 0,002  |                   |

## PtC\_H3PO4\_180C\_Pt\_L3\_0049

| #                  | Pt-O   | Pt-Pt  | R-factor filtered |
|--------------------|--------|--------|-------------------|
| R [Å]              | 1,915* | 2,745  | 14,32             |
| error              |        | 0,0069 |                   |
| s [Å]              | 0,238* | 0,0882 |                   |
| error (inaccurate) |        | 0,0056 |                   |
| N                  | 0*     | 7,55   |                   |
| error              |        | 1,3    |                   |
| 2s2                | 0,113* | 0,0156 |                   |
| error              |        | 0,002  |                   |

## PtC\_H3PO4\_180C\_Pt\_L3\_0050

| #     | Pt-O   | Pt-Pt | R-factor filtered |
|-------|--------|-------|-------------------|
| R [Å] | 1,912* | 2,752 | 14,32             |
| error |        | 0,007 |                   |

|                    |        |        |
|--------------------|--------|--------|
| s [Å]              | 0,227* | 0,0925 |
| error (inaccurate) |        | 0,0056 |
| N                  | 0*     | 8,21   |
| error              |        | 1,4    |
| 2s2                | 0,103* | 0,0171 |
| error              |        | 0,0021 |

#### PtC\_H3PO4\_180C\_Pt\_L3\_0051

| #                  | Pt-O    | Pt-Pt  | R-factor filtered |
|--------------------|---------|--------|-------------------|
| R [Å]              | 1,922*  | 2,753  | 14,51             |
| error              |         | 0,0069 |                   |
| s [Å]              | 0,205*  | 0,0886 |                   |
| error (inaccurate) |         | 0,0056 |                   |
| N                  | 0*      | 7,53   |                   |
| error              |         | 1,3    |                   |
| 2s2                | 0,0844* | 0,0157 |                   |
| error              |         | 0,002  |                   |

#### PtC\_H3PO4\_180C\_Pt\_L3\_0052

| #                  | Pt-O    | Pt-Pt  | R-factor filtered |
|--------------------|---------|--------|-------------------|
| R [Å]              | 1,929*  | 2,754  | 14,51             |
| error              |         | 0,0068 |                   |
| s [Å]              | 0,217*  | 0,0874 |                   |
| error (inaccurate) |         | 0,0056 |                   |
| N                  | 0*      | 7,42   |                   |
| error              |         | 1,3    |                   |
| 2s2                | 0,0941* | 0,0153 |                   |
| error              |         | 0,002  |                   |

#### PtC\_H3PO4\_180C\_Pt\_L3\_0053

| #                  | Pt-O   | Pt-Pt  | R-factor filtered |
|--------------------|--------|--------|-------------------|
| R [Å]              | 1,918* | 2,751  | 14,51             |
| error              |        | 0,0067 |                   |
| s [Å]              | 0,228* | 0,0856 |                   |
| error (inaccurate) |        | 0,0056 |                   |
| N                  | 0*     | 7,19   |                   |
| error              |        | 1,2    |                   |
| 2s2                | 0,104* | 0,0146 |                   |
| error              |        | 0,0019 |                   |

#### PtC\_H3PO4\_180C\_Pt\_L3\_0054

| #                  | Pt-O   | Pt-Pt  | R-factor filtered |
|--------------------|--------|--------|-------------------|
| R [Å]              | 1,902* | 2,749  | 14,51             |
| error              |        | 0,0069 |                   |
| s [Å]              | 0,245* | 0,0891 |                   |
| error (inaccurate) |        | 0,0056 |                   |
| N                  | 0*     | 7,6    |                   |
| error              |        | 1,3    |                   |

|       |       |        |
|-------|-------|--------|
| 2s2   | 0,12* | 0,0159 |
| error |       | 0,002  |

#### PtC\_H3PO4\_180C\_Pt\_L3\_0055

| #                  | Pt-O    | Pt-Pt  | R-factor filtered |
|--------------------|---------|--------|-------------------|
| R [Å]              | 1,93*   | 2,75   | 14,51             |
| error              |         | 0,0069 |                   |
| s [Å]              | 0,216*  | 0,0917 |                   |
| error (inaccurate) |         | 0,0055 |                   |
| N                  | 0*      | 8,22   |                   |
| error              |         | 1,4    |                   |
| 2s2                | 0,0936* | 0,0168 |                   |
| error              |         | 0,002  |                   |

#### PtC\_H3PO4\_180C\_Pt\_L3\_0056

| #                  | Pt-O   | Pt-Pt  | R-factor filtered |
|--------------------|--------|--------|-------------------|
| R [Å]              | 1,91*  | 2,754  | 14,51             |
| error              |        | 0,007  |                   |
| s [Å]              | 0,236* | 0,088  |                   |
| error (inaccurate) |        | 0,0057 |                   |
| N                  | 0*     | 7,42   |                   |
| error              |        | 1,3    |                   |
| 2s2                | 0,111* | 0,0155 |                   |
| error              |        | 0,002  |                   |

#### PtC\_H3PO4\_180C\_Pt\_L3\_0057

| #                  | Pt-O   | Pt-Pt  | R-factor filtered |
|--------------------|--------|--------|-------------------|
| R [Å]              | 1,897* | 2,753  | 14,51             |
| error              |        | 0,0069 |                   |
| s [Å]              | 0,242* | 0,086  |                   |
| error (inaccurate) |        | 0,0057 |                   |
| N                  | 0*     | 7,08   |                   |
| error              |        | 1,3    |                   |
| 2s2                | 0,117* | 0,0148 |                   |
| error              |        | 0,002  |                   |

#### PtC\_H3PO4\_180C\_Pt\_L3\_0058

| #                  | Pt-O   | Pt-Pt  | R-factor filtered |
|--------------------|--------|--------|-------------------|
| R [Å]              | 1,914* | 2,748  | 14,51             |
| error              |        | 0,007  |                   |
| s [Å]              | 0,234* | 0,0914 |                   |
| error (inaccurate) |        | 0,0055 |                   |
| N                  | 0*     | 8,05   |                   |
| error              |        | 1,4    |                   |
| 2s2                | 0,11*  | 0,0167 |                   |
| error              |        | 0,002  |                   |

#### PtC\_H3PO4\_180C\_Pt\_L3\_0059



| #                  | Pt-O   | Pt-Pt  | R-factor filtered |
|--------------------|--------|--------|-------------------|
| R [Å]              | 1,915* | 2,751  | 14,51             |
| error              |        | 0,0067 |                   |
| s [Å]              | 0,238* | 0,0876 |                   |
| error (inaccurate) |        | 0,0055 |                   |
| N                  | 0*     | 7,63   |                   |
| error              |        | 1,3    |                   |
| 2s2                | 0,113* | 0,0154 |                   |
| error              |        | 0,0019 |                   |

#### PtC\_H3PO4\_180C\_Pt\_L3\_0060

| #                  | Pt-O   | Pt-Pt  | R-factor filtered |
|--------------------|--------|--------|-------------------|
| R [Å]              | 1,912* | 2,753  | 14,51             |
| error              |        | 0,0067 |                   |
| s [Å]              | 0,227* | 0,0852 |                   |
| error (inaccurate) |        | 0,0056 |                   |
| N                  | 0*     | 7,11   |                   |
| error              |        | 1,2    |                   |
| 2s2                | 0,103* | 0,0145 |                   |
| error              |        | 0,0019 |                   |

#### PtC\_H3PO4\_180C\_Pt\_L3\_0061

| #                  | Pt-O    | Pt-Pt  | R-factor filtered |
|--------------------|---------|--------|-------------------|
| R [Å]              | 1,922*  | 2,752  | 15,75             |
| error              |         | 0,0068 |                   |
| s [Å]              | 0,205*  | 0,0887 |                   |
| error (inaccurate) |         | 0,0056 |                   |
| N                  | 0*      | 7,7    |                   |
| error              |         | 1,3    |                   |
| 2s2                | 0,0844* | 0,0157 |                   |
| error              |         | 0,002  |                   |

#### PtC\_H3PO4\_180C\_Pt\_L3\_0062

| #                  | Pt-O    | Pt-Pt  | R-factor filtered |
|--------------------|---------|--------|-------------------|
| R [Å]              | 1,929*  | 2,749  | 15,75             |
| error              |         | 0,0065 |                   |
| s [Å]              | 0,217*  | 0,0841 |                   |
| error (inaccurate) |         | 0,0055 |                   |
| N                  | 0*      | 7,09   |                   |
| error              |         | 1,2    |                   |
| 2s2                | 0,0941* | 0,0141 |                   |
| error              |         | 0,0018 |                   |

#### PtC\_H3PO4\_180C\_Pt\_L3\_0063

| #     | Pt-O   | Pt-Pt  | R-factor filtered |
|-------|--------|--------|-------------------|
| R [Å] | 1,918* | 2,755  | 15,75             |
| error |        | 0,0066 |                   |
| s [Å] | 0,228* | 0,084  |                   |

|                    |        |        |
|--------------------|--------|--------|
| error (inaccurate) |        | 0,0056 |
| N                  | 0*     | 7,06   |
| error              |        | 1,2    |
| 2s2                | 0,104* | 0,0141 |
| error              |        | 0,0019 |

#### PtC\_H3PO4\_180C\_Pt\_L3\_0064

| #                  | Pt-O   | Pt-Pt  | R-factor filtered |
|--------------------|--------|--------|-------------------|
| R [Å]              | 1,902* | 2,755  | 15,75             |
| error              |        | 0,0072 |                   |
| s [Å]              | 0,245* | 0,0907 |                   |
| error (inaccurate) |        | 0,0058 |                   |
| N                  | 0*     | 7,61   |                   |
| error              |        | 1,4    |                   |
| 2s2                | 0,12*  | 0,0164 |                   |
| error              |        | 0,0021 |                   |

#### PtC\_H3PO4\_180C\_Pt\_L3\_0065

| #                  | Pt-O    | Pt-Pt  | R-factor filtered |
|--------------------|---------|--------|-------------------|
| R [Å]              | 1,93*   | 2,748  | 15,75             |
| error              |         | 0,0068 |                   |
| s [Å]              | 0,216*  | 0,0876 |                   |
| error (inaccurate) |         | 0,0056 |                   |
| N                  | 0*      | 7,51   |                   |
| error              |         | 1,3    |                   |
| 2s2                | 0,0936* | 0,0154 |                   |
| error              |         | 0,0019 |                   |

#### PtC\_H3PO4\_180C\_Pt\_L3\_0066

| #                  | Pt-O   | Pt-Pt  | R-factor filtered |
|--------------------|--------|--------|-------------------|
| R [Å]              | 1,91*  | 2,753  | 15,75             |
| error              |        | 0,0067 |                   |
| s [Å]              | 0,236* | 0,0854 |                   |
| error (inaccurate) |        | 0,0056 |                   |
| N                  | 0*     | 7,11   |                   |
| error              |        | 1,2    |                   |
| 2s2                | 0,111* | 0,0146 |                   |
| error              |        | 0,0019 |                   |

#### PtC\_H3PO4\_180C\_Pt\_L3\_0067

| #                  | Pt-O   | Pt-Pt  | R-factor filtered |
|--------------------|--------|--------|-------------------|
| R [Å]              | 1,897* | 2,755  | 15,75             |
| error              |        | 0,0067 |                   |
| s [Å]              | 0,242* | 0,0875 |                   |
| error (inaccurate) |        | 0,0055 |                   |
| N                  | 0*     | 7,5    |                   |
| error              |        | 1,3    |                   |
| 2s2                | 0,117* | 0,0153 |                   |

error 0,0019

PtC\_H3PO4\_180C\_Pt\_L3\_0068

| #                  | Pt-O   | Pt-Pt  | R-factor filtered |
|--------------------|--------|--------|-------------------|
| R [Å]              | 1,914* | 2,751  | 15,75             |
| error              |        | 0,007  |                   |
| s [Å]              | 0,234* | 0,0929 |                   |
| error (inaccurate) |        | 0,0055 |                   |
| N                  | 0*     | 8,39   |                   |
| error              |        | 1,4    |                   |
| 2s2                | 0,11*  | 0,0173 |                   |
| error              |        | 0,0021 |                   |

PtC\_H3PO4\_180C\_Pt\_L3\_0069

| #                  | Pt-O   | Pt-Pt  | R-factor filtered |
|--------------------|--------|--------|-------------------|
| R [Å]              | 1,915* | 2,75   | 15,75             |
| error              |        | 0,0067 |                   |
| s [Å]              | 0,238* | 0,0837 |                   |
| error (inaccurate) |        | 0,0057 |                   |
| N                  | 0*     | 6,86   |                   |
| error              |        | 1,2    |                   |
| 2s2                | 0,113* | 0,014  |                   |
| error              |        | 0,0019 |                   |

PtC\_H3PO4\_180C\_Pt\_L3\_0070

| #                  | Pt-O   | Pt-Pt  | R-factor filtered |
|--------------------|--------|--------|-------------------|
| R [Å]              | 1,912* | 2,758  | 15,75             |
| error              |        | 0,0068 |                   |
| s [Å]              | 0,227* | 0,0882 |                   |
| error (inaccurate) |        | 0,0056 |                   |
| N                  | 0*     | 7,57   |                   |
| error              |        | 1,3    |                   |
| 2s2                | 0,103* | 0,0156 |                   |
| error              |        | 0,002  |                   |

PtC\_H3PO4\_180C\_Pt\_L3\_0071

| #                  | Pt-O    | Pt-Pt  | R-factor filtered |
|--------------------|---------|--------|-------------------|
| R [Å]              | 1,922*  | 2,753  | 15,85             |
| error              |         | 0,0067 |                   |
| s [Å]              | 0,205*  | 0,0897 |                   |
| error (inaccurate) |         | 0,0054 |                   |
| N                  | 0*      | 7,93   |                   |
| error              |         | 1,3    |                   |
| 2s2                | 0,0844* | 0,0161 |                   |
| error              |         | 0,002  |                   |

PtC\_H3PO4\_180C\_Pt\_L3\_0072

| # | Pt-O | Pt-Pt | R-factor filtered |
|---|------|-------|-------------------|
|---|------|-------|-------------------|

|                    |         |        |       |
|--------------------|---------|--------|-------|
| R [Å]              | 1,929*  | 2,752  | 15,85 |
| error              |         | 0,0066 |       |
| s [Å]              | 0,217*  | 0,0837 |       |
| error (inaccurate) |         | 0,0056 |       |
| N                  | 0*      | 6,95   |       |
| error              |         | 1,2    |       |
| 2s2                | 0,0941* | 0,014  |       |
| error              |         | 0,0019 |       |

#### PtC\_H3PO4\_180C\_Pt\_L3\_0073

| #                  | Pt-O   | Pt-Pt  | R-factor filtered |
|--------------------|--------|--------|-------------------|
| R [Å]              | 1,918* | 2,753  | 15,85             |
| error              |        | 0,0066 |                   |
| s [Å]              | 0,228* | 0,0832 |                   |
| error (inaccurate) |        | 0,0056 |                   |
| N                  | 0*     | 6,87   |                   |
| error              |        | 1,2    |                   |
| 2s2                | 0,104* | 0,0138 |                   |
| error              |        | 0,0019 |                   |

#### PtC\_H3PO4\_180C\_Pt\_L3\_0074

| #                  | Pt-O   | Pt-Pt  | R-factor filtered |
|--------------------|--------|--------|-------------------|
| R [Å]              | 1,902* | 2,751  | 15,85             |
| error              |        | 0,0068 |                   |
| s [Å]              | 0,245* | 0,0881 |                   |
| error (inaccurate) |        | 0,0056 |                   |
| N                  | 0*     | 7,53   |                   |
| error              |        | 1,3    |                   |
| 2s2                | 0,12*  | 0,0155 |                   |
| error              |        | 0,002  |                   |

#### PtC\_H3PO4\_180C\_Pt\_L3\_0075

| #                  | Pt-O    | Pt-Pt  | R-factor filtered |
|--------------------|---------|--------|-------------------|
| R [Å]              | 1,93*   | 2,754  | 15,85             |
| error              |         | 0,007  |                   |
| s [Å]              | 0,216*  | 0,092  |                   |
| error (inaccurate) |         | 0,0056 |                   |
| N                  | 0*      | 8,18   |                   |
| error              |         | 1,4    |                   |
| 2s2                | 0,0936* | 0,0169 |                   |
| error              |         | 0,002  |                   |

#### PtC\_H3PO4\_180C\_Pt\_L3\_0076

| #                  | Pt-O   | Pt-Pt  | R-factor filtered |
|--------------------|--------|--------|-------------------|
| R [Å]              | 1,91*  | 2,754  | 15,85             |
| error              |        | 0,0066 |                   |
| s [Å]              | 0,236* | 0,0855 |                   |
| error (inaccurate) |        | 0,0055 |                   |

|       |        |        |
|-------|--------|--------|
| N     | 0*     | 7,25   |
| error |        | 1,2    |
| 2s2   | 0,111* | 0,0146 |
| error |        | 0,0019 |

#### PtC\_H3PO4\_180C\_Pt\_L3\_0077

| #                  | Pt-O   | Pt-Pt  | R-factor filtered |
|--------------------|--------|--------|-------------------|
| R [Å]              | 1,897* | 2,751  | 15,85             |
| error              |        | 0,0069 |                   |
| s [Å]              | 0,242* | 0,0893 |                   |
| error (inaccurate) |        | 0,0056 |                   |
| N                  | 0*     | 7,74   |                   |
| error              |        | 1,3    |                   |
| 2s2                | 0,117* | 0,016  |                   |
| error              |        | 0,002  |                   |

#### PtC\_H3PO4\_180C\_Pt\_L3\_0078

| #                  | Pt-O   | Pt-Pt  | R-factor filtered |
|--------------------|--------|--------|-------------------|
| R [Å]              | 1,914* | 2,752  | 15,85             |
| error              |        | 0,0065 |                   |
| s [Å]              | 0,234* | 0,0853 |                   |
| error (inaccurate) |        | 0,0055 |                   |
| N                  | 0*     | 7,32   |                   |
| error              |        | 1,2    |                   |
| 2s2                | 0,11*  | 0,0145 |                   |
| error              |        | 0,0019 |                   |

#### PtC\_H3PO4\_180C\_Pt\_L3\_0079

| #                  | Pt-O   | Pt-Pt  | R-factor filtered |
|--------------------|--------|--------|-------------------|
| R [Å]              | 1,915* | 2,755  | 15,85             |
| error              |        | 0,0068 |                   |
| s [Å]              | 0,238* | 0,0871 |                   |
| error (inaccurate) |        | 0,0056 |                   |
| N                  | 0*     | 7,39   |                   |
| error              |        | 1,3    |                   |
| 2s2                | 0,113* | 0,0152 |                   |
| error              |        | 0,002  |                   |

| <b>Pt-Co/KB in situ</b>     | <b>Time (min)</b> |
|-----------------------------|-------------------|
| Sample                      |                   |
| PtCoC_dry_Pt_L3             | 0                 |
| PtCoC_dry_140C_Pt_L3        | 0                 |
| PtCoC_H3PO4_140C_Pt_L3_0000 | 3                 |
| PtCoC_H3PO4_140C_Pt_L3_0001 | 6                 |
| PtCoC_H3PO4_140C_Pt_L3_0002 | 9                 |
| PtCoC_H3PO4_140C_Pt_L3_0003 | 12                |
| PtCoC_H3PO4_140C_Pt_L3_0004 | 15                |
| PtCoC_H3PO4_140C_Pt_L3_0005 | 18                |
| PtCoC_H3PO4_140C_Pt_L3_0006 | 21                |
| PtCoC_H3PO4_140C_Pt_L3_0007 | 24                |
| PtCoC_H3PO4_140C_Pt_L3_0008 | 27                |
| PtCoC_H3PO4_140C_Pt_L3_0009 | 30                |
| PtCoC_H3PO4_140C_Pt_L3_0010 | 33                |
| PtCoC_H3PO4_140C_Pt_L3_0011 | 36                |
| PtCoC_H3PO4_140C_Pt_L3_0012 | 39                |
| PtCoC_H3PO4_140C_Pt_L3_0013 | 42                |
| PtCoC_H3PO4_140C_Pt_L3_0014 | 45                |
| PtCoC_H3PO4_140C_Pt_L3_0015 | 48                |
| PtCoC_H3PO4_140C_Pt_L3_0016 | 51                |
| PtCoC_H3PO4_140C_Pt_L3_0017 | 54                |
| PtCoC_H3PO4_140C_Pt_L3_0018 | 57                |
| PtCoC_H3PO4_140C_Pt_L3_0019 | 60                |
| PtCoC_H3PO4_140C_Pt_L3_0020 | 63                |

PtCoC\_dry\_Pt\_L3 S02 = 0,92%

| #                  | Pt-O    | Pt-Co    | Pt-Pt | R-factor filtered |       |
|--------------------|---------|----------|-------|-------------------|-------|
| R [Å]              | 1,961*  | 2,66*    |       | 2,705             | 26,37 |
| error              |         |          |       | 0,0088            |       |
| s [Å]              | 0,0852* | 0,0556*  |       | 0,0942            |       |
| error (inaccurate) |         |          |       | 0,0063            |       |
| N                  | 0*      | 0*       |       | 9,11              |       |
| error              |         |          |       | 1,7               |       |
| 2s2                | 0,0145* | 0,00618* |       | 0,0177            |       |
| error              |         |          |       | 0,0024            |       |

PtCoC\_dry\_140C\_Pt\_L3

| #                  | Pt-O    | Pt-Co    | Pt-Pt | R-factor filtered |       |
|--------------------|---------|----------|-------|-------------------|-------|
| R [Å]              | 1,96*   | 2,651*   |       | 2,696             | 26,37 |
| error              |         |          |       | 0,01              |       |
| s [Å]              | 0,0899* | 0,068*   |       | 0,102             |       |
| error (inaccurate) |         |          |       | 0,0071            |       |
| N                  | 0*      | 0*       |       | 9,37              |       |
| error              |         |          |       | 2                 |       |
| 2s2                | 0,0162* | 0,00924* |       | 0,0207            |       |
| error              |         |          |       | 0,0029            |       |

PtCoC\_H3PO4\_140C\_Pt\_L3\_0000

| #                  | Pt-O    | Pt-Co   | Pt-Pt | R-factor filtered |       |
|--------------------|---------|---------|-------|-------------------|-------|
| R [Å]              | 1,967*  | 2,638*  |       | 2,713             | 26,37 |
| error              |         |         |       | 0,0087            |       |
| s [Å]              | 0,0778* | 0,0722* |       | 0,0966            |       |
| error (inaccurate) |         |         |       | 0,0061            |       |
| N                  | 0*      | 0*      |       | 9,95              |       |
| error              |         |         |       | 1,8               |       |
| 2s2                | 0,0121* | 0,0104* |       | 0,0187            |       |
| error              |         |         |       | 0,0023            |       |

PtCoC\_H3PO4\_140C\_Pt\_L3\_0001

| #                  | Pt-O    | Pt-Co    | Pt-Pt | R-factor filtered |       |
|--------------------|---------|----------|-------|-------------------|-------|
| R [Å]              | 1,967*  | 2,66*    |       | 2,721             | 26,37 |
| error              |         |          |       | 0,0085            |       |
| s [Å]              | 0,0707* | 0,0556*  |       | 0,0958            |       |
| error (inaccurate) |         |          |       | 0,0059            |       |
| N                  | 0*      | 0*       |       | 9,83              |       |
| error              |         |          |       | 1,8               |       |
| 2s2                | 0,01*   | 0,00618* |       | 0,0184            |       |
| error              |         |          |       | 0,0023            |       |

PtCoC\_H3PO4\_140C\_Pt\_L3\_0002

| #     | Pt-O   | Pt-Co  | Pt-Pt | R-factor filtered |       |
|-------|--------|--------|-------|-------------------|-------|
| R [Å] | 1,967* | 2,651* |       | 2,709             | 26,37 |
| error |        |        |       | 0,0084            |       |

|                    |         |          |        |
|--------------------|---------|----------|--------|
| s [Å]              | 0,0707* | 0,068*   | 0,0975 |
| error (inaccurate) |         |          | 0,0057 |
| N                  | 0*      | 0*       | 10,5   |
| error              |         |          | 1,8    |
| 2s2                | 0,01*   | 0,00924* | 0,019  |
| error              |         |          | 0,0022 |

#### PtCoC\_H3PO4\_140C\_Pt\_L3\_0003

| #                  | Pt-O    | Pt-Co   | Pt-Pt | R-factor filtered |       |
|--------------------|---------|---------|-------|-------------------|-------|
| R [Å]              | 1,967*  | 2,638*  |       | 2,701             | 26,37 |
| error              |         |         |       | 0,0073            |       |
| s [Å]              | 0,209*  | 0,0722* |       | 0,0936            |       |
| error (inaccurate) |         |         |       | 0,0051            |       |
| N                  | 0*      | 0*      |       | 10,1              |       |
| error              |         |         |       | 1,6               |       |
| 2s2                | 0,0872* | 0,0104* |       | 0,0175            |       |
| error              |         |         |       | 0,0019            |       |

#### PtCoC\_H3PO4\_140C\_Pt\_L3\_0004

| #                  | Pt-O    | Pt-Co   | Pt-Pt | R-factor filtered |       |
|--------------------|---------|---------|-------|-------------------|-------|
| R [Å]              | 1,967*  | 2,638*  |       | 2,723             | 26,37 |
| error              |         |         |       | 0,0077            |       |
| s [Å]              | 0,0778* | 0,0722* |       | 0,0813            |       |
| error (inaccurate) |         |         |       | 0,006             |       |
| N                  | 0*      | 0*      |       | 7,52              |       |
| error              |         |         |       | 1,3               |       |
| 2s2                | 0,0121* | 0,0104* |       | 0,0132            |       |
| error              |         |         |       | 0,002             |       |

#### PtCoC\_H3PO4\_140C\_Pt\_L3\_0005

| #                  | Pt-O    | Pt-Co    | Pt-Pt | R-factor filtered |       |
|--------------------|---------|----------|-------|-------------------|-------|
| R [Å]              | 1,967*  | 2,66*    |       | 2,72              | 26,37 |
| error              |         |          |       | 0,0082            |       |
| s [Å]              | 0,0707* | 0,0556*  |       | 0,0988            |       |
| error (inaccurate) |         |          |       | 0,0057            |       |
| N                  | 0*      | 0*       |       | 11                |       |
| error              |         |          |       | 1,9               |       |
| 2s2                | 0,01*   | 0,00618* |       | 0,0195            |       |
| error              |         |          |       | 0,0022            |       |

#### PtCoC\_H3PO4\_140C\_Pt\_L3\_0006

| #                  | Pt-O    | Pt-Co  | Pt-Pt | R-factor filtered |       |
|--------------------|---------|--------|-------|-------------------|-------|
| R [Å]              | 1,967*  | 2,651* |       | 2,709             | 26,37 |
| error              |         |        |       | 0,0085            |       |
| s [Å]              | 0,0707* | 0,068* |       | 0,0989            |       |
| error (inaccurate) |         |        |       | 0,0058            |       |
| N                  | 0*      | 0*     |       | 10,9              |       |
| error              |         |        |       | 1,9               |       |



|       |       |          |        |
|-------|-------|----------|--------|
| 2s2   | 0,01* | 0,00924* | 0,0196 |
| error |       |          | 0,0023 |

#### PtCoC\_H3PO4\_140C\_Pt\_L3\_0007

| #                  | Pt-O   | Pt-Co   | Pt-Pt | R-factor filtered |       |
|--------------------|--------|---------|-------|-------------------|-------|
| R [Å]              | 1,967* | 2,638*  |       | 2,706             | 26,37 |
| error              |        |         |       | 0,0078            |       |
| s [Å]              | 0,1*   | 0,0722* |       | 0,0835            |       |
| error (inaccurate) |        |         |       | 0,0058            |       |
| N                  | 0*     | 0*      |       | 7,84              |       |
| error              |        |         |       | 1,4               |       |
| 2s2                | 0,02*  | 0,0104* |       | 0,0139            |       |
| error              |        |         |       | 0,0019            |       |

#### PtCoC\_H3PO4\_140C\_Pt\_L3\_0008

| #                  | Pt-O    | Pt-Co   | Pt-Pt | R-factor filtered |       |
|--------------------|---------|---------|-------|-------------------|-------|
| R [Å]              | 1,967*  | 2,638*  |       | 2,731             | 26,37 |
| error              |         |         |       | 0,0075            |       |
| s [Å]              | 0,0778* | 0,0722* |       | 0,0869            |       |
| error (inaccurate) |         |         |       | 0,0057            |       |
| N                  | 0*      | 0*      |       | 8,66              |       |
| error              |         |         |       | 1,5               |       |
| 2s2                | 0,0121* | 0,0104* |       | 0,0151            |       |
| error              |         |         |       | 0,002             |       |

#### PtCoC\_H3PO4\_140C\_Pt\_L3\_0009

| #                  | Pt-O    | Pt-Co    | Pt-Pt | R-factor filtered |       |
|--------------------|---------|----------|-------|-------------------|-------|
| R [Å]              | 1,967*  | 2,66*    |       | 2,696             | 26,37 |
| error              |         |          |       | 0,0088            |       |
| s [Å]              | 0,0707* | 0,0556*  |       | 0,0995            |       |
| error (inaccurate) |         |          |       | 0,006             |       |
| N                  | 0*      | 0*       |       | 10,8              |       |
| error              |         |          |       | 1,9               |       |
| 2s2                | 0,01*   | 0,00618* |       | 0,0198            |       |
| error              |         |          |       | 0,0024            |       |

#### PtCoC\_H3PO4\_140C\_Pt\_L3\_0010

| #                  | Pt-O    | Pt-Co    | Pt-Pt | R-factor filtered |       |
|--------------------|---------|----------|-------|-------------------|-------|
| R [Å]              | 1,967*  | 2,651*   |       | 2,708             | 26,37 |
| error              |         |          |       | 0,0078            |       |
| s [Å]              | 0,0707* | 0,068*   |       | 0,0876            |       |
| error (inaccurate) |         |          |       | 0,0057            |       |
| N                  | 0*      | 0*       |       | 8,76              |       |
| error              |         |          |       | 1,5               |       |
| 2s2                | 0,01*   | 0,00924* |       | 0,0153            |       |
| error              |         |          |       | 0,002             |       |

#### PtCoC\_H3PO4\_140C\_Pt\_L3\_0011

| #                  | Pt-O    | Pt-Co   | Pt-Pt | R-factor filtered |      |
|--------------------|---------|---------|-------|-------------------|------|
| R [Å]              | 1,967*  | 2,638*  |       | 2,745             | 46,5 |
| error              |         |         |       | 0,0092            |      |
| s [Å]              | 0,0778* | 0,0722* |       | 0,1               |      |
| error (inaccurate) |         |         |       | 0,0064            |      |
| N                  | 0*      | 0*      |       | 10,2              |      |
| error              |         |         |       | 1,9               |      |
| 2s2                | 0,0121* | 0,0104* |       | 0,0201            |      |
| error              |         |         |       | 0,0025            |      |

#### PtCoC\_H3PO4\_140C\_Pt\_L3\_0012

| #                  | Pt-O    | Pt-Co    | Pt-Pt | R-factor filtered |      |
|--------------------|---------|----------|-------|-------------------|------|
| R [Å]              | 1,967*  | 2,66*    |       | 2,692             | 46,5 |
| error              |         |          |       | 0,0089            |      |
| s [Å]              | 0,0707* | 0,0556*  |       | 0,103             |      |
| error (inaccurate) |         |          |       | 0,006             |      |
| N                  | 0*      | 0*       |       | 11,7              |      |
| error              |         |          |       | 2,1               |      |
| 2s2                | 0,01*   | 0,00618* |       | 0,0213            |      |
| error              |         |          |       | 0,0025            |      |

#### PtCoC\_H3PO4\_140C\_Pt\_L3\_0013

| #                  | Pt-O    | Pt-Co    | Pt-Pt | R-factor filtered |      |
|--------------------|---------|----------|-------|-------------------|------|
| R [Å]              | 1,967*  | 2,651*   |       | 2,675             | 46,5 |
| error              |         |          |       | 0,0079            |      |
| s [Å]              | 0,0707* | 0,068*   |       | 0,071             |      |
| error (inaccurate) |         |          |       | 0,0069            |      |
| N                  | 0*      | 0*       |       | 5,84              |      |
| error              |         |          |       | 1,1               |      |
| 2s2                | 0,01*   | 0,00924* |       | 0,0101            |      |
| error              |         |          |       | 0,0019            |      |

#### PtCoC\_H3PO4\_140C\_Pt\_L3\_0014

| #                  | Pt-O    | Pt-Co   | Pt-Pt | R-factor filtered |      |
|--------------------|---------|---------|-------|-------------------|------|
| R [Å]              | 1,967*  | 2,638*  |       | 2,723             | 46,5 |
| error              |         |         |       | 0,0068            |      |
| s [Å]              | 0,209*  | 0,0722* |       | 0,0782            |      |
| error (inaccurate) |         |         |       | 0,0058            |      |
| N                  | 0*      | 0*      |       | 6,88              |      |
| error              |         |         |       | 1,2               |      |
| 2s2                | 0,0872* | 0,0104* |       | 0,0122            |      |
| error              |         |         |       | 0,0018            |      |

#### PtCoC\_H3PO4\_140C\_Pt\_L3\_0015

| #     | Pt-O    | Pt-Co   | Pt-Pt | R-factor filtered |      |
|-------|---------|---------|-------|-------------------|------|
| R [Å] | 1,967*  | 2,638*  |       | 2,707             | 46,5 |
| error |         |         |       | 0,0088            |      |
| s [Å] | 0,0778* | 0,0722* |       | 0,101             |      |

|                    |         |         |        |
|--------------------|---------|---------|--------|
| error (inaccurate) |         |         | 0,006  |
| N                  | 0*      | 0*      | 11,1   |
| error              |         |         | 2      |
| 2s2                | 0,0121* | 0,0104* | 0,0204 |
| error              |         |         | 0,0024 |

#### PtCoC\_H3PO4\_140C\_Pt\_L3\_0016

| #                  | Pt-O    | Pt-Co    | Pt-Pt | R-factor filtered |      |
|--------------------|---------|----------|-------|-------------------|------|
| R [Å]              | 1,967*  | 2,66*    |       | 2,687             | 46,5 |
| error              |         |          |       | 0,0095            |      |
| s [Å]              | 0,0707* | 0,0556*  |       | 0,109             |      |
| error (inaccurate) |         |          |       | 0,0059            |      |
| N                  | 0*      | 0*       |       | 13                |      |
| error              |         |          |       | 2,3               |      |
| 2s2                | 0,01*   | 0,00618* |       | 0,0236            |      |
| error              |         |          |       | 0,0026            |      |

#### PtCoC\_H3PO4\_140C\_Pt\_L3\_0017

| #                  | Pt-O    | Pt-Co    | Pt-Pt | R-factor filtered |      |
|--------------------|---------|----------|-------|-------------------|------|
| R [Å]              | 1,967*  | 2,651*   |       | 2,703             | 46,5 |
| error              |         |          |       | 0,0077            |      |
| s [Å]              | 0,0707* | 0,068*   |       | 0,074             |      |
| error (inaccurate) |         |          |       | 0,0065            |      |
| N                  | 0*      | 0*       |       | 6,31              |      |
| error              |         |          |       | 1,1               |      |
| 2s2                | 0,01*   | 0,00924* |       | 0,011             |      |
| error              |         |          |       | 0,0019            |      |

#### PtCoC\_H3PO4\_140C\_Pt\_L3\_0018

| #                  | Pt-O   | Pt-Co   | Pt-Pt | R-factor filtered |      |
|--------------------|--------|---------|-------|-------------------|------|
| R [Å]              | 1,967* | 2,638*  |       | 2,731             | 46,5 |
| error              |        |         |       | 0,01              |      |
| s [Å]              | 0,1*   | 0,0722* |       | 0,111             |      |
| error (inaccurate) |        |         |       | 0,0067            |      |
| N                  | 0*     | 0*      |       | 12,4              |      |
| error              |        |         |       | 2,4               |      |
| 2s2                | 0,02*  | 0,0104* |       | 0,0246            |      |
| error              |        |         |       | 0,003             |      |

#### PtCoC\_H3PO4\_140C\_Pt\_L3\_0019

| #                  | Pt-O    | Pt-Co   | Pt-Pt | R-factor filtered |      |
|--------------------|---------|---------|-------|-------------------|------|
| R [Å]              | 1,967*  | 2,638*  |       | 2,599             | 46,5 |
| error              |         |         |       | 0,0087            |      |
| s [Å]              | 0,0778* | 0,0722* |       | 0,0779            |      |
| error (inaccurate) |         |         |       | 0,0071            |      |
| N                  | 0*      | 0*      |       | 6,2               |      |
| error              |         |         |       | 1,3               |      |
| 2s2                | 0,0121* | 0,0104* |       | 0,0121            |      |

|       |        |
|-------|--------|
| error | 0,0022 |
|-------|--------|

PtCoC\_H3PO4\_140C\_Pt\_L3\_0020

|                    |         |          |       |                   |      |
|--------------------|---------|----------|-------|-------------------|------|
| #                  | Pt-O    | Pt-Co    | Pt-Pt | R-factor filtered |      |
| R [Å]              | 1,967*  | 2,66*    |       | 2,726             | 46,5 |
| error              |         |          |       | 0,0076            |      |
| s [Å]              | 0,0707* | 0,0556*  |       | 0,049             |      |
| error (inaccurate) |         |          |       | 0,0094            |      |
| N                  | 0*      | 0*       |       | 4,03              |      |
| error              |         |          |       | 0,77              |      |
| 2s2                | 0,01*   | 0,00618* |       | 0,00481           |      |
| error              |         |          |       | 0,0018            |      |

| Sample                      | Time (min) |
|-----------------------------|------------|
| PtCoC_dry_Pt_L3             | 0          |
| PtCoC_dry_180C_Pt_L3        | 0          |
| PtCoC_H3PO4_180C_Pt_L3_0000 | 3          |
| PtCoC_H3PO4_180C_Pt_L3_0001 | 6          |
| PtCoC_H3PO4_180C_Pt_L3_0002 | 9          |
| PtCoC_H3PO4_180C_Pt_L3_0003 | 12         |
| PtCoC_H3PO4_180C_Pt_L3_0004 | 15         |
| PtCoC_H3PO4_180C_Pt_L3_0005 | 18         |
| PtCoC_H3PO4_180C_Pt_L3_0006 | 21         |
| PtCoC_H3PO4_180C_Pt_L3_0007 | 24         |
| PtCoC_H3PO4_180C_Pt_L3_0008 | 27         |
| PtCoC_H3PO4_180C_Pt_L3_0009 | 30         |
| PtCoC_H3PO4_180C_Pt_L3_0010 | 33         |
| PtCoC_H3PO4_180C_Pt_L3_0011 | 36         |
| PtCoC_H3PO4_180C_Pt_L3_0012 | 39         |
| PtCoC_H3PO4_180C_Pt_L3_0013 | 42         |
| PtCoC_H3PO4_180C_Pt_L3_0014 | 45         |
| PtCoC_H3PO4_180C_Pt_L3_0015 | 48         |
| PtCoC_H3PO4_180C_Pt_L3_0016 | 51         |
| PtCoC_H3PO4_180C_Pt_L3_0017 | 54         |
| PtCoC_H3PO4_180C_Pt_L3_0018 | 57         |
| PtCoC_H3PO4_180C_Pt_L3_0019 | 60         |
| PtCoC_H3PO4_180C_Pt_L3_0020 | 63         |
| PtCoC_H3PO4_180C_Pt_L3_0021 | 66         |
| PtCoC_H3PO4_180C_Pt_L3_0022 | 69         |
| PtCoC_H3PO4_180C_Pt_L3_0023 | 72         |
| PtCoC_H3PO4_180C_Pt_L3_0024 | 75         |
| PtCoC_H3PO4_180C_Pt_L3_0025 | 78         |
| PtCoC_H3PO4_180C_Pt_L3_0026 | 81         |
| PtCoC_H3PO4_180C_Pt_L3_0027 | 84         |
| PtCoC_H3PO4_180C_Pt_L3_0028 | 87         |
| PtCoC_H3PO4_180C_Pt_L3_0029 | 90         |
| PtCoC_H3PO4_180C_Pt_L3_0030 | 93         |
| PtCoC_H3PO4_180C_Pt_L3_0031 | 96         |
| PtCoC_H3PO4_180C_Pt_L3_0032 | 99         |
| PtCoC_H3PO4_180C_Pt_L3_0033 | 102        |
| PtCoC_H3PO4_180C_Pt_L3_0034 | 105        |
| PtCoC_H3PO4_180C_Pt_L3_0035 | 108        |
| PtCoC_H3PO4_180C_Pt_L3_0036 | 111        |
| PtCoC_H3PO4_180C_Pt_L3_0037 | 114        |
| PtCoC_H3PO4_180C_Pt_L3_0038 | 117        |
| PtCoC_H3PO4_180C_Pt_L3_0039 | 120        |
| PtCoC_H3PO4_180C_Pt_L3_0040 | 123        |
| PtCoC_H3PO4_180C_Pt_L3_0041 | 126        |
| PtCoC_H3PO4_180C_Pt_L3_0042 | 129        |
| PtCoC_H3PO4_180C_Pt_L3_0043 | 159        |

|                             |     |
|-----------------------------|-----|
| PtCoC_H3PO4_180C_Pt_L3_0044 | 162 |
| PtCoC_H3PO4_180C_Pt_L3_0045 | 165 |
| PtCoC_H3PO4_180C_Pt_L3_0046 | 168 |
| PtCoC_H3PO4_180C_Pt_L3_0047 | 174 |
| PtCoC_H3PO4_180C_Pt_L3_0048 | 183 |
| PtCoC_H3PO4_180C_Pt_L3_0049 | 213 |
| PtCoC_H3PO4_180C_Pt_L3_0050 | 216 |
| PtCoC_H3PO4_180C_Pt_L3_0051 | 240 |

| PtCoC_dry_Pt_L3    |        |          |       |                   | S02 = 0,924 |
|--------------------|--------|----------|-------|-------------------|-------------|
| #                  | Pt-O   | Pt-Co    | Pt-Pt | R-factor filtered |             |
| R [Å]              | 1,956  | 2,692*   |       | 2,707             | 15,4        |
| error              | 0,04   |          |       | 0,0092            |             |
| s [Å]              | 0,0808 | 0,0304*  | 0,1*  |                   |             |
| error (inaccurate) | 0,043  |          |       |                   |             |
| N                  | 0,822  | 0*       |       | 10,9              |             |
| error              | 0,69   |          |       | 0,84              |             |
| 2s2                | 0,013  | 0,00185* | 0,02* |                   |             |
| error              | 0,018  |          |       |                   |             |

| PtCoC_dry_180C_Pt_L3 |        |          |       |                   |      |
|----------------------|--------|----------|-------|-------------------|------|
| #                    | Pt-O   | Pt-Co    | Pt-Pt | R-factor filtered |      |
| R [Å]                | 1,959  | 2,691*   |       | 2,703             | 15,4 |
| error                | 0,047  |          |       | 0,012             |      |
| s [Å]                | 0,0897 | 0,045*   | 0,1*  |                   |      |
| error (inaccurate)   | 0,047  |          |       |                   |      |
| N                    | 0,863  | 0*       |       | 8,2               |      |
| error                | 0,8    |          |       | 0,85              |      |
| 2s2                  | 0,0161 | 0,00405* | 0,02* |                   |      |
| error                | 0,021  |          |       |                   |      |

| PtCoC_H3PO4_180C_Pt_L3_0000 |         |         |       |                   |      |
|-----------------------------|---------|---------|-------|-------------------|------|
| #                           | Pt-O    | Pt-Co   | Pt-Pt | R-factor filtered |      |
| R [Å]                       | 1,878*  | 2,668*  |       | 2,709             | 15,4 |
| error                       |         |         |       | 0,0088            |      |
| s [Å]                       | 0,0316* | 0,0938* | 0,1*  |                   |      |
| error (inaccurate)          |         |         |       |                   |      |
| N                           | 0*      | 0*      |       | 10,8              |      |
| error                       |         |         |       | 0,82              |      |
| 2s2                         | 0,002*  | 0,0176* | 0,02* |                   |      |
| error                       |         |         |       |                   |      |

| PtCoC_H3PO4_180C_Pt_L3_0001 |         |         |       |                   |      |
|-----------------------------|---------|---------|-------|-------------------|------|
| #                           | Pt-O    | Pt-Co   | Pt-Pt | R-factor filtered |      |
| R [Å]                       | 1,967*  | 2,654*  |       | 2,705             | 15,4 |
| error                       |         |         |       | 0,0086            |      |
| s [Å]                       | 0,0707* | 0,0895* | 0,1*  |                   |      |
| error (inaccurate)          |         |         |       |                   |      |
| N                           | 0*      | 0*      |       | 11                |      |
| error                       |         |         |       | 0,82              |      |
| 2s2                         | 0,01*   | 0,016*  | 0,02* |                   |      |
| error                       |         |         |       |                   |      |

| PtCoC_H3PO4_180C_Pt_L3_0002 |        |        |       |                   |      |
|-----------------------------|--------|--------|-------|-------------------|------|
| #                           | Pt-O   | Pt-Co  | Pt-Pt | R-factor filtered |      |
| R [Å]                       | 1,967* | 2,665* |       | 2,708             | 15,4 |
| error                       |        |        |       | 0,0086            |      |

|                             |         |         |       |                   |      |
|-----------------------------|---------|---------|-------|-------------------|------|
| s [Å]                       | 0,0707* | 0,0973* | 0,1*  |                   |      |
| error (inaccurate)          |         |         |       |                   |      |
| N                           | 0*      | 0*      |       | 11                |      |
| error                       |         |         |       | 0,82              |      |
| 2s2                         | 0,01*   | 0,0189* | 0,02* |                   |      |
| error                       |         |         |       |                   |      |
| PtCoC_H3PO4_180C_Pt_L3_0003 |         |         |       |                   |      |
| #                           | Pt-O    | Pt-Co   | Pt-Pt | R-factor filtered |      |
| R [Å]                       | 1,967*  | 2,669*  |       | 2,71              | 15,4 |
| error                       |         |         |       | 0,008             |      |
| s [Å]                       | 0,209*  | 0,0828* | 0,1*  |                   |      |
| error (inaccurate)          |         |         |       |                   |      |
| N                           | 0*      | 0*      |       | 11                |      |
| error                       |         |         |       | 0,82              |      |
| 2s2                         | 0,0872* | 0,0137* | 0,02* |                   |      |
| error                       |         |         |       |                   |      |
| PtCoC_H3PO4_180C_Pt_L3_0004 |         |         |       |                   |      |
| #                           | Pt-O    | Pt-Co   | Pt-Pt | R-factor filtered |      |
| R [Å]                       | 1,967*  | 2,655*  |       | 2,712             | 15,4 |
| error                       |         |         |       | 0,0087            |      |
| s [Å]                       | 0,0778* | 0,0983* | 0,1*  |                   |      |
| error (inaccurate)          |         |         |       |                   |      |
| N                           | 0*      | 0*      |       | 10,9              |      |
| error                       |         |         |       | 0,82              |      |
| 2s2                         | 0,0121* | 0,0193* | 0,02* |                   |      |
| error                       |         |         |       |                   |      |
| PtCoC_H3PO4_180C_Pt_L3_0005 |         |         |       |                   |      |
| #                           | Pt-O    | Pt-Co   | Pt-Pt | R-factor filtered |      |
| R [Å]                       | 1,967*  | 2,66*   |       | 2,712             | 15,4 |
| error                       |         |         |       | 0,0089            |      |
| s [Å]                       | 0,0707* | 0,0939* | 0,1*  |                   |      |
| error (inaccurate)          |         |         |       |                   |      |
| N                           | 0*      | 0*      |       | 10,7              |      |
| error                       |         |         |       | 0,82              |      |
| 2s2                         | 0,01*   | 0,0176* | 0,02* |                   |      |
| error                       |         |         |       |                   |      |
| PtCoC_H3PO4_180C_Pt_L3_0006 |         |         |       |                   |      |
| #                           | Pt-O    | Pt-Co   | Pt-Pt | R-factor filtered |      |
| R [Å]                       | 1,967*  | 2,65*   |       | 2,713             | 15,4 |
| error                       |         |         |       | 0,0046            |      |
| s [Å]                       | 0,0707* | 0,112*  | 0,1*  |                   |      |
| error (inaccurate)          |         |         |       |                   |      |
| N                           | 0*      | 0*      |       | 11                |      |
| error                       |         |         |       | 0,82              |      |



|       |       |         |       |
|-------|-------|---------|-------|
| 2s2   | 0,01* | 0,0251* | 0,02* |
| error |       |         |       |

PtCoC\_H3PO4\_180C\_Pt\_L3\_0007

|                    |        |         |       |                   |      |
|--------------------|--------|---------|-------|-------------------|------|
| #                  | Pt-O   | Pt-Co   | Pt-Pt | R-factor filtered |      |
| R [Å]              | 1,967* | 2,664*  |       | 2,713             | 15,4 |
| error              |        |         |       | 0,0086            |      |
| s [Å]              | 0,1*   | 0,102*  | 0,1*  |                   |      |
| error (inaccurate) |        |         |       |                   |      |
| N                  | 0*     | 0*      |       | 11                |      |
| error              |        |         |       | 0,82              |      |
| 2s2                | 0,02*  | 0,0208* | 0,02* |                   |      |
| error              |        |         |       |                   |      |

PtCoC\_H3PO4\_180C\_Pt\_L3\_0008

|                    |         |         |       |                   |      |
|--------------------|---------|---------|-------|-------------------|------|
| #                  | Pt-O    | Pt-Co   | Pt-Pt | R-factor filtered |      |
| R [Å]              | 1,967*  | 2,644*  |       | 2,716             | 15,4 |
| error              |         |         |       | 0,0087            |      |
| s [Å]              | 0,0778* | 0,103*  | 0,1*  |                   |      |
| error (inaccurate) |         |         |       |                   |      |
| N                  | 0*      | 0*      |       | 10,8              |      |
| error              |         |         |       | 0,82              |      |
| 2s2                | 0,0121* | 0,0211* | 0,02* |                   |      |
| error              |         |         |       |                   |      |

PtCoC\_H3PO4\_180C\_Pt\_L3\_0009

|                    |         |         |       |                   |      |
|--------------------|---------|---------|-------|-------------------|------|
| #                  | Pt-O    | Pt-Co   | Pt-Pt | R-factor filtered |      |
| R [Å]              | 1,967*  | 2,67*   |       | 2,716             | 15,4 |
| error              |         |         |       | 0,0086            |      |
| s [Å]              | 0,0707* | 0,105*  | 0,1*  |                   |      |
| error (inaccurate) |         |         |       |                   |      |
| N                  | 0*      | 0*      |       | 11                |      |
| error              |         |         |       | 0,82              |      |
| 2s2                | 0,01*   | 0,0223* | 0,02* |                   |      |
| error              |         |         |       |                   |      |

PtCoC\_H3PO4\_180C\_Pt\_L3\_0010

|                    |         |         |       |                   |      |
|--------------------|---------|---------|-------|-------------------|------|
| #                  | Pt-O    | Pt-Co   | Pt-Pt | R-factor filtered |      |
| R [Å]              | 1,967*  | 2,658*  |       | 2,715             | 15,4 |
| error              |         |         |       | 0,0087            |      |
| s [Å]              | 0,0707* | 0,103*  | 0,1*  |                   |      |
| error (inaccurate) |         |         |       |                   |      |
| N                  | 0*      | 0*      |       | 10,8              |      |
| error              |         |         |       | 0,82              |      |
| 2s2                | 0,01*   | 0,0213* | 0,02* |                   |      |
| error              |         |         |       |                   |      |

PtCoC\_H3PO4\_180C\_Pt\_L3\_0011

|                    |         |         |       |                   |       |
|--------------------|---------|---------|-------|-------------------|-------|
| #                  | Pt-O    | Pt-Co   | Pt-Pt | R-factor filtered |       |
| R [Å]              | 1,967*  | 2,661*  |       | 2,716             | 14,56 |
| error              |         |         |       | 0,0088            |       |
| s [Å]              | 0,0778* | 0,0994* | 0,1*  |                   |       |
| error (inaccurate) |         |         |       |                   |       |
| N                  | 0*      | 0*      |       | 10,7              |       |
| error              |         |         |       | 0,82              |       |
| 2s2                | 0,0121* | 0,0197* | 0,02* |                   |       |
| error              |         |         |       |                   |       |

PtCoC\_H3PO4\_180C\_Pt\_L3\_0012

|                    |         |         |       |                   |       |
|--------------------|---------|---------|-------|-------------------|-------|
| #                  | Pt-O    | Pt-Co   | Pt-Pt | R-factor filtered |       |
| R [Å]              | 1,967*  | 2,674*  |       | 2,711             | 14,56 |
| error              |         |         |       | 0,0086            |       |
| s [Å]              | 0,0707* | 0,084*  | 0,1*  |                   |       |
| error (inaccurate) |         |         |       |                   |       |
| N                  | 0*      | 0*      |       | 11                |       |
| error              |         |         |       | 0,82              |       |
| 2s2                | 0,01*   | 0,0141* | 0,02* |                   |       |
| error              |         |         |       |                   |       |

PtCoC\_H3PO4\_180C\_Pt\_L3\_0013

|                    |         |         |       |                   |       |
|--------------------|---------|---------|-------|-------------------|-------|
| #                  | Pt-O    | Pt-Co   | Pt-Pt | R-factor filtered |       |
| R [Å]              | 1,967*  | 2,673*  |       | 2,714             | 14,56 |
| error              |         |         |       | 0,0086            |       |
| s [Å]              | 0,0707* | 0,0918* | 0,1*  |                   |       |
| error (inaccurate) |         |         |       |                   |       |
| N                  | 0*      | 0*      |       | 11                |       |
| error              |         |         |       | 0,82              |       |
| 2s2                | 0,01*   | 0,0169* | 0,02* |                   |       |
| error              |         |         |       |                   |       |

PtCoC\_H3PO4\_180C\_Pt\_L3\_0014

|                    |         |           |       |                   |       |
|--------------------|---------|-----------|-------|-------------------|-------|
| #                  | Pt-O    | Pt-Co     | Pt-Pt | R-factor filtered |       |
| R [Å]              | 1,967*  | 2,674*    |       | 2,71              | 14,56 |
| error              |         |           |       | 0,0081            |       |
| s [Å]              | 0,209*  | 0,000856* | 0,1*  |                   |       |
| error (inaccurate) |         |           |       |                   |       |
| N                  | 0*      | 0*        |       | 10,8              |       |
| error              |         |           |       | 0,81              |       |
| 2s2                | 0,0872* | 1,46E-6*  | 0,02* |                   |       |
| error              |         |           |       |                   |       |

PtCoC\_H3PO4\_180C\_Pt\_L3\_0015

|       |         |         |       |                   |       |
|-------|---------|---------|-------|-------------------|-------|
| #     | Pt-O    | Pt-Co   | Pt-Pt | R-factor filtered |       |
| R [Å] | 1,967*  | 2,675*  |       | 2,713             | 14,56 |
| error |         |         |       | 0,0085            |       |
| s [Å] | 0,0778* | 0,0355* | 0,1*  |                   |       |

|                             |         |          |       |                   |       |
|-----------------------------|---------|----------|-------|-------------------|-------|
| error (inaccurate)          |         |          |       |                   |       |
| N                           | 0*      | 0*       |       | 11,1              |       |
| error                       |         |          |       | 0,82              |       |
| 2s2                         | 0,0121* | 0,00252* | 0,02* |                   |       |
| error                       |         |          |       |                   |       |
| PtCoC_H3PO4_180C_Pt_L3_0016 |         |          |       |                   |       |
| #                           | Pt-O    | Pt-Co    | Pt-Pt | R-factor filtered |       |
| R [Å]                       | 1,967*  | 2,653*   |       | 2,717             | 14,56 |
| error                       |         |          |       | 0,0086            |       |
| s [Å]                       | 0,0707* | 0,116*   | 0,1*  |                   |       |
| error (inaccurate)          |         |          |       |                   |       |
| N                           | 0*      | 0*       |       | 11                |       |
| error                       |         |          |       | 0,82              |       |
| 2s2                         | 0,01*   | 0,0267*  | 0,02* |                   |       |
| error                       |         |          |       |                   |       |
| PtCoC_H3PO4_180C_Pt_L3_0017 |         |          |       |                   |       |
| #                           | Pt-O    | Pt-Co    | Pt-Pt | R-factor filtered |       |
| R [Å]                       | 1,967*  | 2,652*   |       | 2,716             | 14,56 |
| error                       |         |          |       | 0,0086            |       |
| s [Å]                       | 0,0707* | 0,088*   | 0,1*  |                   |       |
| error (inaccurate)          |         |          |       |                   |       |
| N                           | 0*      | 0*       |       | 11,1              |       |
| error                       |         |          |       | 0,82              |       |
| 2s2                         | 0,01*   | 0,0155*  | 0,02* |                   |       |
| error                       |         |          |       |                   |       |
| PtCoC_H3PO4_180C_Pt_L3_0018 |         |          |       |                   |       |
| #                           | Pt-O    | Pt-Co    | Pt-Pt | R-factor filtered |       |
| R [Å]                       | 1,967*  | 2,668*   |       | 2,712             | 14,56 |
| error                       |         |          |       | 0,0087            |       |
| s [Å]                       | 0,1*    | 0,0926*  | 0,1*  |                   |       |
| error (inaccurate)          |         |          |       |                   |       |
| N                           | 0*      | 0*       |       | 10,9              |       |
| error                       |         |          |       | 0,82              |       |
| 2s2                         | 0,02*   | 0,0171*  | 0,02* |                   |       |
| error                       |         |          |       |                   |       |
| PtCoC_H3PO4_180C_Pt_L3_0019 |         |          |       |                   |       |
| #                           | Pt-O    | Pt-Co    | Pt-Pt | R-factor filtered |       |
| R [Å]                       | 1,967*  | 2,689*   |       | 2,714             | 14,56 |
| error                       |         |          |       | 0,0084            |       |
| s [Å]                       | 0,0778* | 0,0784*  | 0,1*  |                   |       |
| error (inaccurate)          |         |          |       |                   |       |
| N                           | 0*      | 0*       |       | 11,2              |       |
| error                       |         |          |       | 0,82              |       |
| 2s2                         | 0,0121* | 0,0123*  | 0,02* |                   |       |

error

PtCoC\_H3PO4\_180C\_Pt\_L3\_0020

| #                  | Pt-O    | Pt-Co   | Pt-Pt | R-factor filtered |       |
|--------------------|---------|---------|-------|-------------------|-------|
| R [Å]              | 1,967*  | 2,644*  |       | 2,717             | 14,56 |
| error              |         |         |       | 0,0084            |       |
| s [Å]              | 0,0707* | 0,106*  | 0,1*  |                   |       |
| error (inaccurate) |         |         |       |                   |       |
| N                  | 0*      | 0*      |       | 11,2              |       |
| error              |         |         |       | 0,82              |       |
| 2s2                | 0,01*   | 0,0226* | 0,02* |                   |       |
| error              |         |         |       |                   |       |

PtCoC\_H3PO4\_180C\_Pt\_L3\_0021

| #                  | Pt-O    | Pt-Co   | Pt-Pt | R-factor filtered |       |
|--------------------|---------|---------|-------|-------------------|-------|
| R [Å]              | 1,967*  | 2,667*  |       | 2,715             | 14,37 |
| error              |         |         |       | 0,0085            |       |
| s [Å]              | 0,0778* | 0,0943* | 0,1*  |                   |       |
| error (inaccurate) |         |         |       |                   |       |
| N                  | 0*      | 0*      |       | 11,3              |       |
| error              |         |         |       | 0,82              |       |
| 2s2                | 0,0121* | 0,0178* | 0,02* |                   |       |
| error              |         |         |       |                   |       |

PtCoC\_H3PO4\_180C\_Pt\_L3\_0022

| #                  | Pt-O    | Pt-Co   | Pt-Pt | R-factor filtered |       |
|--------------------|---------|---------|-------|-------------------|-------|
| R [Å]              | 1,967*  | 2,68*   |       | 2,716             | 14,37 |
| error              |         |         |       | 0,0084            |       |
| s [Å]              | 0,0707* | 0,0741* | 0,1*  |                   |       |
| error (inaccurate) |         |         |       |                   |       |
| N                  | 0*      | 0*      |       | 11,2              |       |
| error              |         |         |       | 0,82              |       |
| 2s2                | 0,01*   | 0,011*  | 0,02* |                   |       |
| error              |         |         |       |                   |       |

PtCoC\_H3PO4\_180C\_Pt\_L3\_0023

| #                  | Pt-O    | Pt-Co   | Pt-Pt | R-factor filtered |       |
|--------------------|---------|---------|-------|-------------------|-------|
| R [Å]              | 1,967*  | 2,645*  |       | 2,718             | 14,37 |
| error              |         |         |       | 0,0087            |       |
| s [Å]              | 0,0707* | 0,103*  | 0,1*  |                   |       |
| error (inaccurate) |         |         |       |                   |       |
| N                  | 0*      | 0*      |       | 11                |       |
| error              |         |         |       | 0,82              |       |
| 2s2                | 0,01*   | 0,0211* | 0,02* |                   |       |
| error              |         |         |       |                   |       |

PtCoC\_H3PO4\_180C\_Pt\_L3\_0024

| # | Pt-O | Pt-Co | Pt-Pt | R-factor filtered |  |
|---|------|-------|-------|-------------------|--|
|---|------|-------|-------|-------------------|--|

|                    |         |         |       |        |       |
|--------------------|---------|---------|-------|--------|-------|
| R [Å]              | 1,967*  | 2,656*  |       | 2,71   | 14,37 |
| error              |         |         |       | 0,0082 |       |
| s [Å]              | 0,209*  | 0,0752* | 0,1*  |        |       |
| error (inaccurate) |         |         |       |        |       |
| N                  | 0*      | 0*      |       | 10,7   |       |
| error              |         |         |       | 0,81   |       |
| 2s2                | 0,0872* | 0,0113* | 0,02* |        |       |
| error              |         |         |       |        |       |

#### PtCoC\_H3PO4\_180C\_Pt\_L3\_0025

|                    |         |          |       |        |                   |
|--------------------|---------|----------|-------|--------|-------------------|
| #                  | Pt-O    | Pt-Co    | Pt-Pt |        | R-factor filtered |
| R [Å]              | 1,967*  | 2,685*   |       | 2,711  | 14,37             |
| error              |         |          |       | 0,0085 |                   |
| s [Å]              | 0,0778* | 0,064*   | 0,1*  |        |                   |
| error (inaccurate) |         |          |       |        |                   |
| N                  | 0*      | 0*       |       | 11,1   |                   |
| error              |         |          |       | 0,82   |                   |
| 2s2                | 0,0121* | 0,00818* | 0,02* |        |                   |
| error              |         |          |       |        |                   |

#### PtCoC\_H3PO4\_180C\_Pt\_L3\_0026

|                    |         |         |       |        |                   |
|--------------------|---------|---------|-------|--------|-------------------|
| #                  | Pt-O    | Pt-Co   | Pt-Pt |        | R-factor filtered |
| R [Å]              | 1,967*  | 2,653*  |       | 2,715  | 14,37             |
| error              |         |         |       | 0,0088 |                   |
| s [Å]              | 0,0707* | 0,128*  | 0,1*  |        |                   |
| error (inaccurate) |         |         |       |        |                   |
| N                  | 0*      | 0*      |       | 10,7   |                   |
| error              |         |         |       | 0,82   |                   |
| 2s2                | 0,01*   | 0,0328* | 0,02* |        |                   |
| error              |         |         |       |        |                   |

#### PtCoC\_H3PO4\_180C\_Pt\_L3\_0027

|                    |         |         |       |        |                   |
|--------------------|---------|---------|-------|--------|-------------------|
| #                  | Pt-O    | Pt-Co   | Pt-Pt |        | R-factor filtered |
| R [Å]              | 1,967*  | 2,652*  |       | 2,719  | 14,37             |
| error              |         |         |       | 0,0089 |                   |
| s [Å]              | 0,0707* | 0,107*  | 0,1*  |        |                   |
| error (inaccurate) |         |         |       |        |                   |
| N                  | 0*      | 0*      |       | 10,6   |                   |
| error              |         |         |       | 0,82   |                   |
| 2s2                | 0,01*   | 0,0229* | 0,02* |        |                   |
| error              |         |         |       |        |                   |

#### PtCoC\_H3PO4\_180C\_Pt\_L3\_0028

|                    |        |        |       |        |                   |
|--------------------|--------|--------|-------|--------|-------------------|
| #                  | Pt-O   | Pt-Co  | Pt-Pt |        | R-factor filtered |
| R [Å]              | 1,967* | 2,659* |       | 2,712  | 14,37             |
| error              |        |        |       | 0,0088 |                   |
| s [Å]              | 0,1*   | 0,112* | 0,1*  |        |                   |
| error (inaccurate) |        |        |       |        |                   |

|                             |         |         |       |                   |       |
|-----------------------------|---------|---------|-------|-------------------|-------|
| N                           | 0*      | 0*      |       | 10,7              |       |
| error                       |         |         |       | 0,82              |       |
| 2s2                         | 0,02*   | 0,025*  | 0,02* |                   |       |
| error                       |         |         |       |                   |       |
| PtCoC_H3PO4_180C_Pt_L3_0029 |         |         |       |                   |       |
| #                           | Pt-O    | Pt-Co   | Pt-Pt | R-factor filtered |       |
| R [Å]                       | 1,967*  | 2,679*  |       | 2,713             | 14,37 |
| error                       |         |         |       | 0,0086            |       |
| s [Å]                       | 0,0778* | 0,0853* | 0,1*  |                   |       |
| error (inaccurate)          |         |         |       |                   |       |
| N                           | 0*      | 0*      |       | 11                |       |
| error                       |         |         |       | 0,82              |       |
| 2s2                         | 0,0121* | 0,0145* | 0,02* |                   |       |
| error                       |         |         |       |                   |       |
| PtCoC_H3PO4_180C_Pt_L3_0030 |         |         |       |                   |       |
| #                           | Pt-O    | Pt-Co   | Pt-Pt | R-factor filtered |       |
| R [Å]                       | 1,967*  | 2,644*  |       | 2,713             | 14,37 |
| error                       |         |         |       | 0,0087            |       |
| s [Å]                       | 0,0707* | 0,0959* | 0,1*  |                   |       |
| error (inaccurate)          |         |         |       |                   |       |
| N                           | 0*      | 0*      |       | 10,9              |       |
| error                       |         |         |       | 0,82              |       |
| 2s2                         | 0,01*   | 0,0184* | 0,02* |                   |       |
| error                       |         |         |       |                   |       |
| PtCoC_H3PO4_180C_Pt_L3_0031 |         |         |       |                   |       |
| #                           | Pt-O    | Pt-Co   | Pt-Pt | R-factor filtered |       |
| R [Å]                       | 1,967*  | 2,67*   |       | 2,712             | 14,96 |
| error                       |         |         |       | 0,0085            |       |
| s [Å]                       | 0,0778* | 0,1*    | 0,1*  |                   |       |
| error (inaccurate)          |         |         |       |                   |       |
| N                           | 0*      | 0*      |       | 11,2              |       |
| error                       |         |         |       | 0,82              |       |
| 2s2                         | 0,0121* | 0,02*   | 0,02* |                   |       |
| error                       |         |         |       |                   |       |
| PtCoC_H3PO4_180C_Pt_L3_0032 |         |         |       |                   |       |
| #                           | Pt-O    | Pt-Co   | Pt-Pt | R-factor filtered |       |
| R [Å]                       | 1,967*  | 2,67*   |       | 2,715             | 14,96 |
| error                       |         |         |       | 0,0086            |       |
| s [Å]                       | 0,0707* | 0,1*    | 0,1*  |                   |       |
| error (inaccurate)          |         |         |       |                   |       |
| N                           | 0*      | 0*      |       | 10,9              |       |
| error                       |         |         |       | 0,82              |       |
| 2s2                         | 0,01*   | 0,02*   | 0,02* |                   |       |
| error                       |         |         |       |                   |       |

## PtCoC\_H3PO4\_180C\_Pt\_L3\_0033

| #                  | Pt-O    | Pt-Co | Pt-Pt | R-factor filtered |       |
|--------------------|---------|-------|-------|-------------------|-------|
| R [Å]              | 1,967*  | 2,67* |       | 2,716             | 14,96 |
| error              |         |       |       | 0,0087            |       |
| s [Å]              | 0,0707* | 0,1*  | 0,1*  |                   |       |
| error (inaccurate) |         |       |       |                   |       |
| N                  | 0*      | 0*    |       | 10,8              |       |
| error              |         |       |       | 0,82              |       |
| 2s2                | 0,01*   | 0,02* | 0,02* |                   |       |
| error              |         |       |       |                   |       |

## PtCoC\_H3PO4\_180C\_Pt\_L3\_0034

| #                  | Pt-O    | Pt-Co | Pt-Pt | R-factor filtered |       |
|--------------------|---------|-------|-------|-------------------|-------|
| R [Å]              | 1,967*  | 2,67* |       | 2,711             | 14,96 |
| error              |         |       |       | 0,0081            |       |
| s [Å]              | 0,209*  | 0,1*  | 0,1*  |                   |       |
| error (inaccurate) |         |       |       |                   |       |
| N                  | 0*      | 0*    |       | 10,9              |       |
| error              |         |       |       | 0,81              |       |
| 2s2                | 0,0872* | 0,02* | 0,02* |                   |       |
| error              |         |       |       |                   |       |

## PtCoC\_H3PO4\_180C\_Pt\_L3\_0035

| #                  | Pt-O    | Pt-Co | Pt-Pt | R-factor filtered |       |
|--------------------|---------|-------|-------|-------------------|-------|
| R [Å]              | 1,967*  | 2,67* |       | 2,709             | 14,96 |
| error              |         |       |       | 0,0084            |       |
| s [Å]              | 0,0778* | 0,1*  | 0,1*  |                   |       |
| error (inaccurate) |         |       |       |                   |       |
| N                  | 0*      | 0*    |       | 11,2              |       |
| error              |         |       |       | 0,82              |       |
| 2s2                | 0,0121* | 0,02* | 0,02* |                   |       |
| error              |         |       |       |                   |       |

## PtCoC\_H3PO4\_180C\_Pt\_L3\_0036

| #                  | Pt-O    | Pt-Co | Pt-Pt | R-factor filtered |       |
|--------------------|---------|-------|-------|-------------------|-------|
| R [Å]              | 1,967*  | 2,67* |       | 2,713             | 14,96 |
| error              |         |       |       | 0,0086            |       |
| s [Å]              | 0,0707* | 0,1*  | 0,1*  |                   |       |
| error (inaccurate) |         |       |       |                   |       |
| N                  | 0*      | 0*    |       | 10,9              |       |
| error              |         |       |       | 0,82              |       |
| 2s2                | 0,01*   | 0,02* | 0,02* |                   |       |
| error              |         |       |       |                   |       |

## PtCoC\_H3PO4\_180C\_Pt\_L3\_0037

| #     | Pt-O   | Pt-Co | Pt-Pt | R-factor filtered |       |
|-------|--------|-------|-------|-------------------|-------|
| R [Å] | 1,967* | 2,67* |       | 2,714             | 14,96 |

|                    |         |       |       |        |
|--------------------|---------|-------|-------|--------|
| error              |         |       |       | 0,0089 |
| s [Å]              | 0,0707* | 0,1*  | 0,1*  |        |
| error (inaccurate) |         |       |       |        |
| N                  | 0*      | 0*    |       | 10,6   |
| error              |         |       |       | 0,82   |
| 2s2                | 0,01*   | 0,02* | 0,02* |        |
| error              |         |       |       |        |

#### PtCoC\_H3PO4\_180C\_Pt\_L3\_0038

|                    |        |       |       |        |                   |
|--------------------|--------|-------|-------|--------|-------------------|
| #                  | Pt-O   | Pt-Co | Pt-Pt |        | R-factor filtered |
| R [Å]              | 1,967* | 2,67* |       | 2,711  | 14,96             |
| error              |        |       |       | 0,0087 |                   |
| s [Å]              | 0,1*   | 0,1*  | 0,1*  |        |                   |
| error (inaccurate) |        |       |       |        |                   |
| N                  | 0*     | 0*    |       | 10,8   |                   |
| error              |        |       |       | 0,82   |                   |
| 2s2                | 0,02*  | 0,02* | 0,02* |        |                   |
| error              |        |       |       |        |                   |

#### PtCoC\_H3PO4\_180C\_Pt\_L3\_0039

|                    |         |       |       |        |                   |
|--------------------|---------|-------|-------|--------|-------------------|
| #                  | Pt-O    | Pt-Co | Pt-Pt |        | R-factor filtered |
| R [Å]              | 1,967*  | 2,67* |       | 2,713  | 14,96             |
| error              |         |       |       | 0,0087 |                   |
| s [Å]              | 0,0778* | 0,1*  | 0,1*  |        |                   |
| error (inaccurate) |         |       |       |        |                   |
| N                  | 0*      | 0*    |       | 10,8   |                   |
| error              |         |       |       | 0,82   |                   |
| 2s2                | 0,0121* | 0,02* | 0,02* |        |                   |
| error              |         |       |       |        |                   |

#### PtCoC\_H3PO4\_180C\_Pt\_L3\_0040

|                    |         |       |       |        |                   |
|--------------------|---------|-------|-------|--------|-------------------|
| #                  | Pt-O    | Pt-Co | Pt-Pt |        | R-factor filtered |
| R [Å]              | 1,967*  | 2,67* |       | 2,71   | 14,96             |
| error              |         |       |       | 0,0087 |                   |
| s [Å]              | 0,0707* | 0,1*  | 0,1*  |        |                   |
| error (inaccurate) |         |       |       |        |                   |
| N                  | 0*      | 0*    |       | 11     |                   |
| error              |         |       |       | 0,82   |                   |
| 2s2                | 0,01*   | 0,02* | 0,02* |        |                   |
| error              |         |       |       |        |                   |

#### PtCoC\_H3PO4\_180C\_Pt\_L3\_0041

|                    |         |       |       |        |                   |
|--------------------|---------|-------|-------|--------|-------------------|
| #                  | Pt-O    | Pt-Co | Pt-Pt |        | R-factor filtered |
| R [Å]              | 1,967*  | 2,65* |       | 2,714  | 15,08             |
| error              |         |       |       | 0,0084 |                   |
| s [Å]              | 0,0778* | 0,1*  | 0,1*  |        |                   |
| error (inaccurate) |         |       |       |        |                   |
| N                  | 0*      | 0*    |       | 11,2   |                   |



|                             |         |       |       |                   |       |
|-----------------------------|---------|-------|-------|-------------------|-------|
| error                       |         |       |       | 0,82              |       |
| 2s2                         | 0,0121* | 0,02* | 0,02* |                   |       |
| error                       |         |       |       |                   |       |
| PtCoC_H3PO4_180C_Pt_L3_0042 |         |       |       |                   |       |
| #                           | Pt-O    | Pt-Co | Pt-Pt | R-factor filtered |       |
| R [Å]                       | 1,967*  | 2,65* |       | 2,714             | 15,08 |
| error                       |         |       |       | 0,0082            |       |
| s [Å]                       | 0,0707* | 0,1*  | 0,1*  |                   |       |
| error (inaccurate)          |         |       |       |                   |       |
| N                           | 0*      | 0*    |       | 11,5              |       |
| error                       |         |       |       | 0,82              |       |
| 2s2                         | 0,01*   | 0,02* | 0,02* |                   |       |
| error                       |         |       |       |                   |       |
| PtCoC_H3PO4_180C_Pt_L3_0043 |         |       |       |                   |       |
| #                           | Pt-O    | Pt-Co | Pt-Pt | R-factor filtered |       |
| R [Å]                       | 1,967*  | 2,65* |       | 2,71              | 15,08 |
| error                       |         |       |       | 0,0083            |       |
| s [Å]                       | 0,0707* | 0,1*  | 0,1*  |                   |       |
| error (inaccurate)          |         |       |       |                   |       |
| N                           | 0*      | 0*    |       | 11,3              |       |
| error                       |         |       |       | 0,82              |       |
| 2s2                         | 0,01*   | 0,02* | 0,02* |                   |       |
| error                       |         |       |       |                   |       |
| PtCoC_H3PO4_180C_Pt_L3_0044 |         |       |       |                   |       |
| #                           | Pt-O    | Pt-Co | Pt-Pt | R-factor filtered |       |
| R [Å]                       | 1,967*  | 2,65* |       | 2,714             | 15,08 |
| error                       |         |       |       | 0,0078            |       |
| s [Å]                       | 0,209*  | 0,1*  | 0,1*  |                   |       |
| error (inaccurate)          |         |       |       |                   |       |
| N                           | 0*      | 0*    |       | 11,3              |       |
| error                       |         |       |       | 0,81              |       |
| 2s2                         | 0,0872* | 0,02* | 0,02* |                   |       |
| error                       |         |       |       |                   |       |
| PtCoC_H3PO4_180C_Pt_L3_0045 |         |       |       |                   |       |
| #                           | Pt-O    | Pt-Co | Pt-Pt | R-factor filtered |       |
| R [Å]                       | 1,967*  | 2,65* |       | 2,714             | 15,08 |
| error                       |         |       |       | 0,0085            |       |
| s [Å]                       | 0,0778* | 0,1*  | 0,1*  |                   |       |
| error (inaccurate)          |         |       |       |                   |       |
| N                           | 0*      | 0*    |       | 11,1              |       |
| error                       |         |       |       | 0,82              |       |
| 2s2                         | 0,0121* | 0,02* | 0,02* |                   |       |
| error                       |         |       |       |                   |       |

## PtCoC\_H3PO4\_180C\_Pt\_L3\_0046

| #                  | Pt-O    | Pt-Co | Pt-Pt | R-factor filtered |       |
|--------------------|---------|-------|-------|-------------------|-------|
| R [Å]              | 1,967*  | 2,65* |       | 2,713             | 15,08 |
| error              |         |       |       | 0,0084            |       |
| s [Å]              | 0,0707* | 0,1*  | 0,1*  |                   |       |
| error (inaccurate) |         |       |       |                   |       |
| N                  | 0*      | 0*    |       | 11,2              |       |
| error              |         |       |       | 0,82              |       |
| 2s2                | 0,01*   | 0,02* | 0,02* |                   |       |
| error              |         |       |       |                   |       |

## PtCoC\_H3PO4\_180C\_Pt\_L3\_0047

| #                  | Pt-O    | Pt-Co | Pt-Pt | R-factor filtered |       |
|--------------------|---------|-------|-------|-------------------|-------|
| R [Å]              | 1,967*  | 2,65* |       | 2,716             | 15,08 |
| error              |         |       |       | 0,0083            |       |
| s [Å]              | 0,0707* | 0,1*  | 0,1*  |                   |       |
| error (inaccurate) |         |       |       |                   |       |
| N                  | 0*      | 0*    |       | 11,3              |       |
| error              |         |       |       | 0,82              |       |
| 2s2                | 0,01*   | 0,02* | 0,02* |                   |       |
| error              |         |       |       |                   |       |

## PtCoC\_H3PO4\_180C\_Pt\_L3\_0048

| #                  | Pt-O   | Pt-Co | Pt-Pt | R-factor filtered |       |
|--------------------|--------|-------|-------|-------------------|-------|
| R [Å]              | 1,967* | 2,65* |       | 2,713             | 15,08 |
| error              |        |       |       | 0,0086            |       |
| s [Å]              | 0,1*   | 0,1*  | 0,1*  |                   |       |
| error (inaccurate) |        |       |       |                   |       |
| N                  | 0*     | 0*    |       | 11                |       |
| error              |        |       |       | 0,82              |       |
| 2s2                | 0,02*  | 0,02* | 0,02* |                   |       |
| error              |        |       |       |                   |       |

## PtCoC\_H3PO4\_180C\_Pt\_L3\_0049

| #                  | Pt-O    | Pt-Co | Pt-Pt | R-factor filtered |       |
|--------------------|---------|-------|-------|-------------------|-------|
| R [Å]              | 1,967*  | 2,65* |       | 2,715             | 15,08 |
| error              |         |       |       | 0,0084            |       |
| s [Å]              | 0,0778* | 0,1*  | 0,1*  |                   |       |
| error (inaccurate) |         |       |       |                   |       |
| N                  | 0*      | 0*    |       | 11,2              |       |
| error              |         |       |       | 0,82              |       |
| 2s2                | 0,0121* | 0,02* | 0,02* |                   |       |
| error              |         |       |       |                   |       |

## PtCoC\_H3PO4\_180C\_Pt\_L3\_0050

| #     | Pt-O   | Pt-Co | Pt-Pt | R-factor filtered |       |
|-------|--------|-------|-------|-------------------|-------|
| R [Å] | 1,967* | 2,65* |       | 2,711             | 15,08 |
| error |        |       |       | 0,0085            |       |

|                             |         |         |       |                   |       |
|-----------------------------|---------|---------|-------|-------------------|-------|
| s [Å]                       | 0,0707* | 0,1*    | 0,1*  |                   |       |
| error (inaccurate)          |         |         |       |                   |       |
| N                           | 0*      | 0*      |       | 11,1              |       |
| error                       |         |         |       | 0,82              |       |
| 2s2                         | 0,01*   | 0,02*   | 0,02* |                   |       |
| error                       |         |         |       |                   |       |
| PtCoC_H3PO4_180C_Pt_L3_0051 |         |         |       |                   |       |
| #                           | Pt-O    | Pt-Co   | Pt-Pt | R-factor filtered |       |
| R [Å]                       | 1,967*  | 2,6*    |       | 2,713             | 20,76 |
| error                       |         |         |       | 0,0086            |       |
| s [Å]                       | 0,0778* | 0,0316* | 0,1*  |                   |       |
| error (inaccurate)          |         |         |       |                   |       |
| N                           | 0*      | 0*      |       | 10,9              |       |
| error                       |         |         |       | 0,82              |       |
| 2s2                         | 0,0121* | 0,002*  | 0,02* |                   |       |
| error                       |         |         |       |                   |       |
| PtCoC_H3PO4_180C_Pt_L3_0052 |         |         |       |                   |       |
| #                           | Pt-O    | Pt-Co   | Pt-Pt | R-factor filtered |       |
| R [Å]                       | 1,967*  | 2,6*    |       | 2,714             | 20,76 |
| error                       |         |         |       | 0,0084            |       |
| s [Å]                       | 0,0707* | 0,0316* | 0,1*  |                   |       |
| error (inaccurate)          |         |         |       |                   |       |
| N                           | 0*      | 0*      |       | 11,2              |       |
| error                       |         |         |       | 0,82              |       |
| 2s2                         | 0,01*   | 0,002*  | 0,02* |                   |       |
| error                       |         |         |       |                   |       |
| PtCoC_H3PO4_180C_Pt_L3_0053 |         |         |       |                   |       |
| #                           | Pt-O    | Pt-Co   | Pt-Pt | R-factor filtered |       |
| R [Å]                       | 1,967*  | 2,6*    |       | 2,714             | 20,76 |
| error                       |         |         |       | 0,0087            |       |
| s [Å]                       | 0,0707* | 0,0316* | 0,1*  |                   |       |
| error (inaccurate)          |         |         |       |                   |       |
| N                           | 0*      | 0*      |       | 10,9              |       |
| error                       |         |         |       | 0,82              |       |
| 2s2                         | 0,01*   | 0,002*  | 0,02* |                   |       |
| error                       |         |         |       |                   |       |
| PtCoC_H3PO4_180C_Pt_L3_0054 |         |         |       |                   |       |
| #                           | Pt-O    | Pt-Co   | Pt-Pt | R-factor filtered |       |
| R [Å]                       | 1,967*  | 2,6*    |       | 2,707             | 20,76 |
| error                       |         |         |       | 0,0079            |       |
| s [Å]                       | 0,209*  | 0,0316* | 0,1*  |                   |       |
| error (inaccurate)          |         |         |       |                   |       |
| N                           | 0*      | 0*      |       | 11,1              |       |
| error                       |         |         |       | 0,81              |       |

|       |         |        |       |
|-------|---------|--------|-------|
| 2s2   | 0,0872* | 0,002* | 0,02* |
| error |         |        |       |

PtCoC\_H3PO4\_180C\_Pt\_L3\_0055

|                    |         |         |       |                   |       |
|--------------------|---------|---------|-------|-------------------|-------|
| #                  | Pt-O    | Pt-Co   | Pt-Pt | R-factor filtered |       |
| R [Å]              | 1,967*  | 2,6*    |       | 2,712             | 20,76 |
| error              |         |         |       | 0,0085            |       |
| s [Å]              | 0,0778* | 0,0316* | 0,1*  |                   |       |
| error (inaccurate) |         |         |       |                   |       |
| N                  | 0*      | 0*      |       | 11,1              |       |
| error              |         |         |       | 0,82              |       |
| 2s2                | 0,0121* | 0,002*  | 0,02* |                   |       |
| error              |         |         |       |                   |       |

PtCoC\_H3PO4\_180C\_Pt\_L3\_0057

|                    |         |         |       |                   |       |
|--------------------|---------|---------|-------|-------------------|-------|
| #                  | Pt-O    | Pt-Co   | Pt-Pt | R-factor filtered |       |
| R [Å]              | 1,967*  | 2,6*    |       | 2,711             | 20,76 |
| error              |         |         |       | 0,009             |       |
| s [Å]              | 0,0707* | 0,0316* | 0,1*  |                   |       |
| error (inaccurate) |         |         |       |                   |       |
| N                  | 0*      | 0*      |       | 10,6              |       |
| error              |         |         |       | 0,82              |       |
| 2s2                | 0,01*   | 0,002*  | 0,02* |                   |       |
| error              |         |         |       |                   |       |

PtCoC\_H3PO4\_180C\_Pt\_L3\_0061

|                    |         |         |       |                   |       |
|--------------------|---------|---------|-------|-------------------|-------|
| #                  | Pt-O    | Pt-Co   | Pt-Pt | R-factor filtered |       |
| R [Å]              | 1,967*  | 2,6*    |       | 2,717             | 20,76 |
| error              |         |         |       | 0,0083            |       |
| s [Å]              | 0,0707* | 0,0316* | 0,1*  |                   |       |
| error (inaccurate) |         |         |       |                   |       |
| N                  | 0*      | 0*      |       | 11,3              |       |
| error              |         |         |       | 0,82              |       |
| 2s2                | 0,01*   | 0,002*  | 0,02* |                   |       |
| error              |         |         |       |                   |       |

PtCoC\_H3PO4\_180C\_Pt\_L3\_0070

|                    |        |         |       |                   |       |
|--------------------|--------|---------|-------|-------------------|-------|
| #                  | Pt-O   | Pt-Co   | Pt-Pt | R-factor filtered |       |
| R [Å]              | 1,967* | 2,6*    |       | 2,713             | 20,76 |
| error              |        |         |       | 0,0087            |       |
| s [Å]              | 0,1*   | 0,0316* | 0,1*  |                   |       |
| error (inaccurate) |        |         |       |                   |       |
| N                  | 0*     | 0*      |       | 10,8              |       |
| error              |        |         |       | 0,82              |       |
| 2s2                | 0,02*  | 0,002*  | 0,02* |                   |       |
| error              |        |         |       |                   |       |

PtCoC\_H3PO4\_180C\_Pt\_L3\_0071

| #                  | Pt-O    | Pt-Co   | Pt-Pt | R-factor filtered |       |
|--------------------|---------|---------|-------|-------------------|-------|
| R [Å]              | 1,967*  | 2,6*    |       | 2,722             | 20,76 |
| error              |         |         |       | 0,008             |       |
| s [Å]              | 0,0778* | 0,0316* | 0,1*  |                   |       |
| error (inaccurate) |         |         |       |                   |       |
| N                  | 0*      | 0*      |       | 11,7              |       |
| error              |         |         |       | 0,82              |       |
| 2s2                | 0,0121* | 0,002*  | 0,02* |                   |       |
| error              |         |         |       |                   |       |

#### PtCoC\_H3PO4\_180C\_Pt\_L3\_0074

| #                  | Pt-O    | Pt-Co   | Pt-Pt | R-factor filtered |       |
|--------------------|---------|---------|-------|-------------------|-------|
| R [Å]              | 1,967*  | 2,6*    |       | 2,718             | 20,76 |
| error              |         |         |       | 0,0078            |       |
| s [Å]              | 0,0707* | 0,0316* | 0,1*  |                   |       |
| error (inaccurate) |         |         |       |                   |       |
| N                  | 0*      | 0*      |       | 12                |       |
| error              |         |         |       | 0,82              |       |
| 2s2                | 0,01*   | 0,002*  | 0,02* |                   |       |
| error              |         |         |       |                   |       |

#### PtCoC\_H3PO4\_180C\_Pt\_L3\_0079

| #                  | Pt-O    | Pt-Co   | Pt-Pt | R-factor filtered |       |
|--------------------|---------|---------|-------|-------------------|-------|
| R [Å]              | 2*      | 2,6*    |       | 2,703             | 20,76 |
| error              |         |         |       | 0,0092            |       |
| s [Å]              | 0,0316* | 0,0316* | 0,1*  |                   |       |
| error (inaccurate) |         |         |       |                   |       |
| N                  | 0*      | 0*      |       | 10,3              |       |
| error              |         |         |       | 0,82              |       |
| 2s2                | 0,002*  | 0,002*  | 0,02* |                   |       |
| error              |         |         |       |                   |       |

| Sample                      | Time (min) |
|-----------------------------|------------|
| PtCoC_dry_Pt_L3             | 0          |
| PtCoC_dry_140C_Pt_L3        | 0          |
| PtCoC_H3PO4_140C_Pt_L3_0000 | 3          |
| PtCoC_H3PO4_140C_Pt_L3_0001 | 6          |
| PtCoC_H3PO4_140C_Pt_L3_0002 | 9          |
| PtCoC_H3PO4_140C_Pt_L3_0003 | 12         |
| PtCoC_H3PO4_140C_Pt_L3_0004 | 15         |
| PtCoC_H3PO4_140C_Pt_L3_0005 | 18         |
| PtCoC_H3PO4_140C_Pt_L3_0006 | 21         |
| PtCoC_H3PO4_140C_Pt_L3_0007 | 24         |
| PtCoC_H3PO4_140C_Pt_L3_0008 | 27         |
| PtCoC_H3PO4_140C_Pt_L3_0009 | 30         |
| PtCoC_H3PO4_140C_Pt_L3_0010 | 33         |
| PtCoC_H3PO4_140C_Pt_L3_0011 | 36         |
| PtCoC_H3PO4_140C_Pt_L3_0012 | 39         |
| PtCoC_H3PO4_140C_Pt_L3_0013 | 42         |
| PtCoC_H3PO4_140C_Pt_L3_0014 | 45         |
| PtCoC_H3PO4_140C_Pt_L3_0015 | 48         |
| PtCoC_H3PO4_140C_Pt_L3_0016 | 51         |
| PtCoC_H3PO4_140C_Pt_L3_0017 | 54         |
| PtCoC_H3PO4_140C_Pt_L3_0018 | 57         |
| PtCoC_H3PO4_140C_Pt_L3_0019 | 60         |
| PtCoC_H3PO4_140C_Pt_L3_0020 | 63         |
| PtCoC_H3PO4_140C_Pt_L3_0021 | 66         |
| PtCoC_H3PO4_140C_Pt_L3_0022 | 69         |
| PtCoC_H3PO4_140C_Pt_L3_0023 | 72         |
| PtCoC_H3PO4_140C_Pt_L3_0024 | 75         |
| PtCoC_H3PO4_140C_Pt_L3_0025 | 78         |
| PtCoC_H3PO4_140C_Pt_L3_0026 | 81         |
| PtCoC_H3PO4_140C_Pt_L3_0027 | 84         |
| PtCoC_H3PO4_140C_Pt_L3_0028 | 87         |
| PtCoC_H3PO4_140C_Pt_L3_0029 | 90         |
| PtCoC_H3PO4_140C_Pt_L3_0030 | 93         |
| PtCoC_H3PO4_140C_Pt_L3_0031 | 96         |
| PtCoC_H3PO4_140C_Pt_L3_0032 | 99         |
| PtCoC_H3PO4_140C_Pt_L3_0033 | 102        |
| PtCoC_H3PO4_140C_Pt_L3_0034 | 105        |
| PtCoC_H3PO4_140C_Pt_L3_0035 | 108        |
| PtCoC_H3PO4_140C_Pt_L3_0036 | 111        |
| PtCoC_H3PO4_140C_Pt_L3_0037 | 114        |
| PtCoC_H3PO4_140C_Pt_L3_0038 | 117        |
| PtCoC_H3PO4_140C_Pt_L3_0039 | 120        |
| PtCoC_H3PO4_140C_Pt_L3_0040 | 123        |
| PtCoC_H3PO4_140C_Pt_L3_0041 | 126        |
| PtCoC_H3PO4_140C_Pt_L3_0042 | 129        |
| PtCoC_H3PO4_140C_Pt_L3_0043 | 132        |

|                             |     |
|-----------------------------|-----|
| PtCoC_H3PO4_140C_Pt_L3_0044 | 135 |
| PtCoC_H3PO4_140C_Pt_L3_0045 | 138 |
| PtCoC_H3PO4_140C_Pt_L3_0046 | 141 |
| PtCoC_H3PO4_140C_Pt_L3_0047 | 144 |
| PtCoC_H3PO4_140C_Pt_L3_0048 | 147 |
| PtCoC_H3PO4_140C_Pt_L3_0049 | 150 |
| PtCoC_H3PO4_140C_Pt_L3_0050 | 153 |
| PtCoC_H3PO4_140C_Pt_L3_0051 | 156 |
| PtCoC_H3PO4_140C_Pt_L3_0052 | 159 |
| PtCoC_H3PO4_140C_Pt_L3_0053 | 162 |
| PtCoC_H3PO4_140C_Pt_L3_0054 | 165 |
| PtCoC_H3PO4_140C_Pt_L3_0055 | 168 |
| PtCoC_H3PO4_140C_Pt_L3_0056 | 171 |
| PtCoC_H3PO4_140C_Pt_L3_0057 | 174 |
| PtCoC_H3PO4_140C_Pt_L3_0058 | 177 |
| PtCoC_H3PO4_140C_Pt_L3_0059 | 180 |
| PtCoC_H3PO4_140C_Pt_L3_0060 | 183 |
| PtCoC_H3PO4_140C_Pt_L3_0061 | 186 |
| PtCoC_H3PO4_140C_Pt_L3_0062 | 189 |
| PtCoC_H3PO4_140C_Pt_L3_0063 | 192 |
| PtCoC_H3PO4_140C_Pt_L3_0064 | 195 |
| PtCoC_H3PO4_140C_Pt_L3_0065 | 198 |
| PtCoC_H3PO4_140C_Pt_L3_0066 | 201 |
| PtCoC_H3PO4_140C_Pt_L3_0067 | 204 |
| PtCoC_H3PO4_140C_Pt_L3_0068 | 207 |
| PtCoC_H3PO4_140C_Pt_L3_0069 | 210 |
| PtCoC_H3PO4_140C_Pt_L3_0070 | 213 |
| PtCoC_H3PO4_140C_Pt_L3_0071 | 216 |
| PtCoC_H3PO4_140C_Pt_L3_0072 | 219 |
| PtCoC_H3PO4_140C_Pt_L3_0073 | 222 |
| PtCoC_H3PO4_140C_Pt_L3_0074 | 225 |
| PtCoC_H3PO4_140C_Pt_L3_0075 | 228 |
| PtCoC_H3PO4_140C_Pt_L3_0076 | 231 |
| PtCoC_H3PO4_140C_Pt_L3_0077 | 234 |
| PtCoC_H3PO4_140C_Pt_L3_0078 | 237 |
| PtCoC_H3PO4_140C_Pt_L3_0079 | 240 |

| PtCoC_dry_Pt_L3    |        |          |       | S02 = 0,92        |       |
|--------------------|--------|----------|-------|-------------------|-------|
| #                  | Pt-O   | Pt-Co    | Pt-Pt | R-factor filtered |       |
| R [Å]              | 1,965  | 2,67*    |       | 2,708             | 14,48 |
| error              | 0,04   |          |       | 0,0088            |       |
| s [Å]              | 0,0843 | 0,0503*  | 0,1*  |                   |       |
| error (inaccurate) | 0,043  |          |       |                   |       |
| N                  | 0,878  | 0*       |       | 10,6              |       |
| error              | 0,73   |          |       | 0,83              |       |
| 2s2                | 0,014  | 0,00507* | 0,02* |                   |       |
| error              | 0,018  |          |       |                   |       |

| PtCoC_dry_140C_Pt_L3 |        |         |       |                   |       |
|----------------------|--------|---------|-------|-------------------|-------|
| #                    | Pt-O   | Pt-Co   | Pt-Pt | R-factor filtered |       |
| R [Å]                | 1,943  | 2,665*  |       | 2,702             | 14,48 |
| error                | 0,047  |         |       | 0,011             |       |
| s [Å]                | 0,0915 | 0,0879* | 0,1*  |                   |       |
| error (inaccurate)   | 0,047  |         |       |                   |       |
| N                    | 0,867  | 0*      |       | 8,92              |       |
| error                | 0,79   |         |       | 0,84              |       |
| 2s2                  | 0,0167 | 0,0155* | 0,02* |                   |       |
| error                | 0,022  |         |       |                   |       |

| PtCoC_H3PO4_140C_Pt_L3_0000 |         |           |       |                   |       |
|-----------------------------|---------|-----------|-------|-------------------|-------|
| #                           | Pt-O    | Pt-Co     | Pt-Pt | R-factor filtered |       |
| R [Å]                       | 1,977*  | 2,706*    |       | 2,712             | 14,48 |
| error                       |         |           |       | 0,0096            |       |
| s [Å]                       | 0,141*  | 0,0102*   | 0,1*  |                   |       |
| error (inaccurate)          |         |           |       |                   |       |
| N                           | 0*      | 0*        |       | 9,76              |       |
| error                       |         |           |       | 0,82              |       |
| 2s2                         | 0,0395* | 0,000206* | 0,02* |                   |       |
| error                       |         |           |       |                   |       |

| PtCoC_H3PO4_140C_Pt_L3_0001 |         |         |       |                   |       |
|-----------------------------|---------|---------|-------|-------------------|-------|
| #                           | Pt-O    | Pt-Co   | Pt-Pt | R-factor filtered |       |
| R [Å]                       | 1,967*  | 2,684*  |       | 2,709             | 14,48 |
| error                       |         |         |       | 0,0096            |       |
| s [Å]                       | 0,0707* | 0,0316* | 0,1*  |                   |       |
| error (inaccurate)          |         |         |       |                   |       |
| N                           | 0*      | 0*      |       | 9,85              |       |
| error                       |         |         |       | 0,82              |       |
| 2s2                         | 0,01*   | 0,002*  | 0,02* |                   |       |
| error                       |         |         |       |                   |       |

| PtCoC_H3PO4_140C_Pt_L3_0002 |        |        |       |                   |       |
|-----------------------------|--------|--------|-------|-------------------|-------|
| #                           | Pt-O   | Pt-Co  | Pt-Pt | R-factor filtered |       |
| R [Å]                       | 1,967* | 2,682* |       | 2,712             | 14,48 |
| error                       |        |        |       | 0,009             |       |



|                             |         |          |       |                   |       |
|-----------------------------|---------|----------|-------|-------------------|-------|
| s [Å]                       | 0,0707* | 0,0687*  | 0,1*  |                   |       |
| error (inaccurate)          |         |          |       |                   |       |
| N                           | 0*      | 0*       |       | 10,5              |       |
| error                       |         |          |       | 0,82              |       |
| 2s2                         | 0,01*   | 0,00945* | 0,02* |                   |       |
| error                       |         |          |       |                   |       |
| PtCoC_H3PO4_140C_Pt_L3_0003 |         |          |       |                   |       |
| #                           | Pt-O    | Pt-Co    | Pt-Pt | R-factor filtered |       |
| R [Å]                       | 1,967*  | 2,672*   |       | 2,715             | 14,48 |
| error                       |         |          |       | 0,0085            |       |
| s [Å]                       | 0,209*  | 0,0316*  | 0,1*  |                   |       |
| error (inaccurate)          |         |          |       |                   |       |
| N                           | 0*      | 0*       |       | 10,3              |       |
| error                       |         |          |       | 0,81              |       |
| 2s2                         | 0,0872* | 0,002*   | 0,02* |                   |       |
| error                       |         |          |       |                   |       |
| PtCoC_H3PO4_140C_Pt_L3_0004 |         |          |       |                   |       |
| #                           | Pt-O    | Pt-Co    | Pt-Pt | R-factor filtered |       |
| R [Å]                       | 1,967*  | 2,659*   |       | 2,715             | 14,48 |
| error                       |         |          |       | 0,0089            |       |
| s [Å]                       | 0,0778* | 0,0929*  | 0,1*  |                   |       |
| error (inaccurate)          |         |          |       |                   |       |
| N                           | 0*      | 0*       |       | 10,8              |       |
| error                       |         |          |       | 0,82              |       |
| 2s2                         | 0,0121* | 0,0173*  | 0,02* |                   |       |
| error                       |         |          |       |                   |       |
| PtCoC_H3PO4_140C_Pt_L3_0005 |         |          |       |                   |       |
| #                           | Pt-O    | Pt-Co    | Pt-Pt | R-factor filtered |       |
| R [Å]                       | 1,967*  | 2,647*   |       | 2,714             | 14,48 |
| error                       |         |          |       | 0,0085            |       |
| s [Å]                       | 0,0707* | 0,124*   | 0,1*  |                   |       |
| error (inaccurate)          |         |          |       |                   |       |
| N                           | 0*      | 0*       |       | 11,1              |       |
| error                       |         |          |       | 0,82              |       |
| 2s2                         | 0,01*   | 0,0309*  | 0,02* |                   |       |
| error                       |         |          |       |                   |       |
| PtCoC_H3PO4_140C_Pt_L3_0006 |         |          |       |                   |       |
| #                           | Pt-O    | Pt-Co    | Pt-Pt | R-factor filtered |       |
| R [Å]                       | 1,967*  | 2,63*    |       | 2,714             | 14,48 |
| error                       |         |          |       | 0,0087            |       |
| s [Å]                       | 0,0707* | 0,0955*  | 0,1*  |                   |       |
| error (inaccurate)          |         |          |       |                   |       |
| N                           | 0*      | 0*       |       | 10,9              |       |
| error                       |         |          |       | 0,82              |       |

|       |       |         |       |
|-------|-------|---------|-------|
| 2s2   | 0,01* | 0,0182* | 0,02* |
| error |       |         |       |

PtCoC\_H3PO4\_140C\_Pt\_L3\_0007

|                    |        |         |       |                   |       |
|--------------------|--------|---------|-------|-------------------|-------|
| #                  | Pt-O   | Pt-Co   | Pt-Pt | R-factor filtered |       |
| R [Å]              | 1,967* | 2,664*  |       | 2,713             | 14,48 |
| error              |        |         |       | 0,0085            |       |
| s [Å]              | 0,1*   | 0,0852* | 0,1*  |                   |       |
| error (inaccurate) |        |         |       |                   |       |
| N                  | 0*     | 0*      |       | 11,2              |       |
| error              |        |         |       | 0,82              |       |
| 2s2                | 0,02*  | 0,0145* | 0,02* |                   |       |
| error              |        |         |       |                   |       |

PtCoC\_H3PO4\_140C\_Pt\_L3\_0008

|                    |         |         |       |                   |       |
|--------------------|---------|---------|-------|-------------------|-------|
| #                  | Pt-O    | Pt-Co   | Pt-Pt | R-factor filtered |       |
| R [Å]              | 1,967*  | 2,666*  |       | 2,712             | 14,48 |
| error              |         |         |       | 0,0083            |       |
| s [Å]              | 0,0778* | 0,108*  | 0,1*  |                   |       |
| error (inaccurate) |         |         |       |                   |       |
| N                  | 0*      | 0*      |       | 11,5              |       |
| error              |         |         |       | 0,82              |       |
| 2s2                | 0,0121* | 0,0232* | 0,02* |                   |       |
| error              |         |         |       |                   |       |

PtCoC\_H3PO4\_140C\_Pt\_L3\_0009

|                    |         |        |       |                   |       |
|--------------------|---------|--------|-------|-------------------|-------|
| #                  | Pt-O    | Pt-Co  | Pt-Pt | R-factor filtered |       |
| R [Å]              | 1,967*  | 2,646* |       | 2,713             | 14,48 |
| error              |         |        |       | 0,0082            |       |
| s [Å]              | 0,0707* | 0,114* | 0,1*  |                   |       |
| error (inaccurate) |         |        |       |                   |       |
| N                  | 0*      | 0*     |       | 11,5              |       |
| error              |         |        |       | 0,82              |       |
| 2s2                | 0,01*   | 0,026* | 0,02* |                   |       |
| error              |         |        |       |                   |       |

PtCoC\_H3PO4\_140C\_Pt\_L3\_0010

|                    |         |         |       |                   |       |
|--------------------|---------|---------|-------|-------------------|-------|
| #                  | Pt-O    | Pt-Co   | Pt-Pt | R-factor filtered |       |
| R [Å]              | 1,967*  | 2,646*  |       | 2,713             | 14,48 |
| error              |         |         |       | 0,0084            |       |
| s [Å]              | 0,0707* | 0,0904* | 0,1*  |                   |       |
| error (inaccurate) |         |         |       |                   |       |
| N                  | 0*      | 0*      |       | 11,3              |       |
| error              |         |         |       | 0,82              |       |
| 2s2                | 0,01*   | 0,0163* | 0,02* |                   |       |
| error              |         |         |       |                   |       |

PtCoC\_H3PO4\_140C\_Pt\_L3\_0011

| #                  | Pt-O    | Pt-Co    | Pt-Pt | R-factor filtered |       |
|--------------------|---------|----------|-------|-------------------|-------|
| R [Å]              | 1,971*  | 2,67*    |       | 2,709             | 14,48 |
| error              |         |          |       | 0,0078            |       |
| s [Å]              | 0,0849* | 0,0503*  | 0,1*  |                   |       |
| error (inaccurate) |         |          |       |                   |       |
| N                  | 0*      | 0*       |       | 11,4              |       |
| error              |         |          |       | 0,81              |       |
| 2s2                | 0,0144* | 0,00507* | 0,02* |                   |       |
| error              |         |          |       |                   |       |

#### PtCoC\_H3PO4\_140C\_Pt\_L3\_0012

| #                  | Pt-O    | Pt-Co   | Pt-Pt | R-factor filtered |       |
|--------------------|---------|---------|-------|-------------------|-------|
| R [Å]              | 1,946*  | 2,665*  |       | 2,712             | 14,48 |
| error              |         |         |       | 0,0083            |       |
| s [Å]              | 0,094*  | 0,0879* | 0,1*  |                   |       |
| error (inaccurate) |         |         |       |                   |       |
| N                  | 0*      | 0*      |       | 11,4              |       |
| error              |         |         |       | 0,82              |       |
| 2s2                | 0,0177* | 0,0155* | 0,02* |                   |       |
| error              |         |         |       |                   |       |

#### PtCoC\_H3PO4\_140C\_Pt\_L3\_0013

| #                  | Pt-O    | Pt-Co     | Pt-Pt | R-factor filtered |       |
|--------------------|---------|-----------|-------|-------------------|-------|
| R [Å]              | 1,977*  | 2,706*    |       | 2,71              | 14,48 |
| error              |         |           |       | 0,0086            |       |
| s [Å]              | 0,141*  | 0,0102*   | 0,1*  |                   |       |
| error (inaccurate) |         |           |       |                   |       |
| N                  | 0*      | 0*        |       | 11                |       |
| error              |         |           |       | 0,82              |       |
| 2s2                | 0,0395* | 0,000206* | 0,02* |                   |       |
| error              |         |           |       |                   |       |

#### PtCoC\_H3PO4\_140C\_Pt\_L3\_0014

| #                  | Pt-O    | Pt-Co   | Pt-Pt | R-factor filtered |       |
|--------------------|---------|---------|-------|-------------------|-------|
| R [Å]              | 1,967*  | 2,684*  |       | 2,712             | 14,48 |
| error              |         |         |       | 0,0082            |       |
| s [Å]              | 0,0707* | 0,0316* | 0,1*  |                   |       |
| error (inaccurate) |         |         |       |                   |       |
| N                  | 0*      | 0*      |       | 11,5              |       |
| error              |         |         |       | 0,82              |       |
| 2s2                | 0,01*   | 0,002*  | 0,02* |                   |       |
| error              |         |         |       |                   |       |

#### PtCoC\_H3PO4\_140C\_Pt\_L3\_0015

| #     | Pt-O    | Pt-Co   | Pt-Pt | R-factor filtered |       |
|-------|---------|---------|-------|-------------------|-------|
| R [Å] | 1,967*  | 2,682*  |       | 2,711             | 14,48 |
| error |         |         |       | 0,0083            |       |
| s [Å] | 0,0707* | 0,0687* | 0,1*  |                   |       |

|                             |         |          |       |                   |       |
|-----------------------------|---------|----------|-------|-------------------|-------|
| error (inaccurate)          |         |          |       |                   |       |
| N                           | 0*      | 0*       |       | 11,3              |       |
| error                       |         |          |       | 0,82              |       |
| 2s2                         | 0,01*   | 0,00945* | 0,02* |                   |       |
| error                       |         |          |       |                   |       |
| PtCoC_H3PO4_140C_Pt_L3_0016 |         |          |       |                   |       |
| #                           | Pt-O    | Pt-Co    | Pt-Pt | R-factor filtered |       |
| R [Å]                       | 1,967*  | 2,672*   |       | 2,715             | 14,48 |
| error                       |         |          |       | 0,0078            |       |
| s [Å]                       | 0,209*  | 0,0316*  | 0,1*  |                   |       |
| error (inaccurate)          |         |          |       |                   |       |
| N                           | 0*      | 0*       |       | 11,4              |       |
| error                       |         |          |       | 0,81              |       |
| 2s2                         | 0,0872* | 0,002*   | 0,02* |                   |       |
| error                       |         |          |       |                   |       |
| PtCoC_H3PO4_140C_Pt_L3_0017 |         |          |       |                   |       |
| #                           | Pt-O    | Pt-Co    | Pt-Pt | R-factor filtered |       |
| R [Å]                       | 1,967*  | 2,659*   |       | 2,711             | 14,48 |
| error                       |         |          |       | 0,0083            |       |
| s [Å]                       | 0,0778* | 0,0929*  | 0,1*  |                   |       |
| error (inaccurate)          |         |          |       |                   |       |
| N                           | 0*      | 0*       |       | 11,3              |       |
| error                       |         |          |       | 0,82              |       |
| 2s2                         | 0,0121* | 0,0173*  | 0,02* |                   |       |
| error                       |         |          |       |                   |       |
| PtCoC_H3PO4_140C_Pt_L3_0018 |         |          |       |                   |       |
| #                           | Pt-O    | Pt-Co    | Pt-Pt | R-factor filtered |       |
| R [Å]                       | 1,967*  | 2,647*   |       | 2,713             | 14,48 |
| error                       |         |          |       | 0,0081            |       |
| s [Å]                       | 0,0707* | 0,124*   | 0,1*  |                   |       |
| error (inaccurate)          |         |          |       |                   |       |
| N                           | 0*      | 0*       |       | 11,6              |       |
| error                       |         |          |       | 0,82              |       |
| 2s2                         | 0,01*   | 0,0309*  | 0,02* |                   |       |
| error                       |         |          |       |                   |       |
| PtCoC_H3PO4_140C_Pt_L3_0019 |         |          |       |                   |       |
| #                           | Pt-O    | Pt-Co    | Pt-Pt | R-factor filtered |       |
| R [Å]                       | 1,967*  | 2,63*    |       | 2,717             | 14,48 |
| error                       |         |          |       | 0,0082            |       |
| s [Å]                       | 0,0707* | 0,0955*  | 0,1*  |                   |       |
| error (inaccurate)          |         |          |       |                   |       |
| N                           | 0*      | 0*       |       | 11,5              |       |
| error                       |         |          |       | 0,82              |       |
| 2s2                         | 0,01*   | 0,0182*  | 0,02* |                   |       |

error

PtCoC\_H3PO4\_140C\_Pt\_L3\_0020

| #                  | Pt-O   | Pt-Co   | Pt-Pt | R-factor filtered |       |
|--------------------|--------|---------|-------|-------------------|-------|
| R [Å]              | 1,967* | 2,664*  |       | 2,715             | 14,48 |
| error              |        |         |       | 0,0084            |       |
| s [Å]              | 0,1*   | 0,0852* | 0,1*  |                   |       |
| error (inaccurate) |        |         |       |                   |       |
| N                  | 0*     | 0*      |       | 11,4              |       |
| error              |        |         |       | 0,82              |       |
| 2s2                | 0,02*  | 0,0145* | 0,02* |                   |       |
| error              |        |         |       |                   |       |

PtCoC\_H3PO4\_140C\_Pt\_L3\_0021

| #                  | Pt-O    | Pt-Co   | Pt-Pt | R-factor filtered |       |
|--------------------|---------|---------|-------|-------------------|-------|
| R [Å]              | 1,967*  | 2,666*  |       | 2,71              | 14,48 |
| error              |         |         |       | 0,0083            |       |
| s [Å]              | 0,0778* | 0,108*  | 0,1*  |                   |       |
| error (inaccurate) |         |         |       |                   |       |
| N                  | 0*      | 0*      |       | 11,4              |       |
| error              |         |         |       | 0,82              |       |
| 2s2                | 0,0121* | 0,0232* | 0,02* |                   |       |
| error              |         |         |       |                   |       |

PtCoC\_H3PO4\_140C\_Pt\_L3\_0022

| #                  | Pt-O    | Pt-Co  | Pt-Pt | R-factor filtered |       |
|--------------------|---------|--------|-------|-------------------|-------|
| R [Å]              | 1,967*  | 2,646* |       | 2,709             | 14,48 |
| error              |         |        |       | 0,008             |       |
| s [Å]              | 0,0707* | 0,114* | 0,1*  |                   |       |
| error (inaccurate) |         |        |       |                   |       |
| N                  | 0*      | 0*     |       | 11,7              |       |
| error              |         |        |       | 0,82              |       |
| 2s2                | 0,01*   | 0,026* | 0,02* |                   |       |
| error              |         |        |       |                   |       |

PtCoC\_H3PO4\_140C\_Pt\_L3\_0023

| #                  | Pt-O    | Pt-Co   | Pt-Pt | R-factor filtered |       |
|--------------------|---------|---------|-------|-------------------|-------|
| R [Å]              | 1,967*  | 2,646*  |       | 2,715             | 14,48 |
| error              |         |         |       | 0,0084            |       |
| s [Å]              | 0,0707* | 0,0904* | 0,1*  |                   |       |
| error (inaccurate) |         |         |       |                   |       |
| N                  | 0*      | 0*      |       | 11,2              |       |
| error              |         |         |       | 0,82              |       |
| 2s2                | 0,01*   | 0,0163* | 0,02* |                   |       |
| error              |         |         |       |                   |       |

PtCoC\_H3PO4\_140C\_Pt\_L3\_0024

| # | Pt-O | Pt-Co | Pt-Pt | R-factor filtered |  |
|---|------|-------|-------|-------------------|--|
|---|------|-------|-------|-------------------|--|

|                    |         |          |       |       |       |
|--------------------|---------|----------|-------|-------|-------|
| R [Å]              | 1,971*  | 2,67*    |       | 2,709 | 14,48 |
| error              |         |          |       | 0,008 |       |
| s [Å]              | 0,085*  | 0,0503*  | 0,1*  |       |       |
| error (inaccurate) |         |          |       |       |       |
| N                  | 0*      | 0*       |       | 11,1  |       |
| error              |         |          |       | 0,81  |       |
| 2s2                | 0,0144* | 0,00507* | 0,02* |       |       |
| error              |         |          |       |       |       |

#### PtCoC\_H3PO4\_140C\_Pt\_L3\_0025

| #                  | Pt-O    | Pt-Co   | Pt-Pt | R-factor filtered |       |
|--------------------|---------|---------|-------|-------------------|-------|
| R [Å]              | 1,946*  | 2,665*  |       | 2,711             | 14,48 |
| error              |         |         |       | 0,0082            |       |
| s [Å]              | 0,094*  | 0,0879* | 0,1*  |                   |       |
| error (inaccurate) |         |         |       |                   |       |
| N                  | 0*      | 0*      |       | 11,5              |       |
| error              |         |         |       | 0,82              |       |
| 2s2                | 0,0177* | 0,0155* | 0,02* |                   |       |
| error              |         |         |       |                   |       |

#### PtCoC\_H3PO4\_140C\_Pt\_L3\_0026

| #                  | Pt-O    | Pt-Co     | Pt-Pt | R-factor filtered |       |
|--------------------|---------|-----------|-------|-------------------|-------|
| R [Å]              | 1,977*  | 2,706*    |       | 2,713             | 14,48 |
| error              |         |           |       | 0,0082            |       |
| s [Å]              | 0,141*  | 0,0102*   | 0,1*  |                   |       |
| error (inaccurate) |         |           |       |                   |       |
| N                  | 0*      | 0*        |       | 11,4              |       |
| error              |         |           |       | 0,82              |       |
| 2s2                | 0,0395* | 0,000206* | 0,02* |                   |       |
| error              |         |           |       |                   |       |

#### PtCoC\_H3PO4\_140C\_Pt\_L3\_0027

| #                  | Pt-O    | Pt-Co   | Pt-Pt | R-factor filtered |       |
|--------------------|---------|---------|-------|-------------------|-------|
| R [Å]              | 1,967*  | 2,684*  |       | 2,71              | 14,48 |
| error              |         |         |       | 0,0082            |       |
| s [Å]              | 0,0707* | 0,0316* | 0,1*  |                   |       |
| error (inaccurate) |         |         |       |                   |       |
| N                  | 0*      | 0*      |       | 11,6              |       |
| error              |         |         |       | 0,82              |       |
| 2s2                | 0,01*   | 0,002*  | 0,02* |                   |       |
| error              |         |         |       |                   |       |

#### PtCoC\_H3PO4\_140C\_Pt\_L3\_0028

| #                  | Pt-O    | Pt-Co   | Pt-Pt | R-factor filtered |       |
|--------------------|---------|---------|-------|-------------------|-------|
| R [Å]              | 1,967*  | 2,682*  |       | 2,71              | 14,48 |
| error              |         |         |       | 0,0044            |       |
| s [Å]              | 0,0707* | 0,0687* | 0,1*  |                   |       |
| error (inaccurate) |         |         |       |                   |       |

|                             |         |          |       |                   |       |
|-----------------------------|---------|----------|-------|-------------------|-------|
| N                           | 0*      | 0*       |       | 11,4              |       |
| error                       |         |          |       | 0,83              |       |
| 2s2                         | 0,01*   | 0,00945* | 0,02* |                   |       |
| error                       |         |          |       |                   |       |
| PtCoC_H3PO4_140C_Pt_L3_0029 |         |          |       |                   |       |
| #                           | Pt-O    | Pt-Co    | Pt-Pt | R-factor filtered |       |
| R [Å]                       | 1,967*  | 2,672*   |       | 2,71              | 14,48 |
| error                       |         |          |       | 0,0076            |       |
| s [Å]                       | 0,209*  | 0,0316*  | 0,1*  |                   |       |
| error (inaccurate)          |         |          |       |                   |       |
| N                           | 0*      | 0*       |       | 11,6              |       |
| error                       |         |          |       | 0,81              |       |
| 2s2                         | 0,0872* | 0,002*   | 0,02* |                   |       |
| error                       |         |          |       |                   |       |
| PtCoC_H3PO4_140C_Pt_L3_0030 |         |          |       |                   |       |
| #                           | Pt-O    | Pt-Co    | Pt-Pt | R-factor filtered |       |
| R [Å]                       | 1,967*  | 2,659*   |       | 2,712             | 14,48 |
| error                       |         |          |       | 0,0083            |       |
| s [Å]                       | 0,0778* | 0,0929*  | 0,1*  |                   |       |
| error (inaccurate)          |         |          |       |                   |       |
| N                           | 0*      | 0*       |       | 11,4              |       |
| error                       |         |          |       | 0,82              |       |
| 2s2                         | 0,0121* | 0,0173*  | 0,02* |                   |       |
| error                       |         |          |       |                   |       |
| PtCoC_H3PO4_140C_Pt_L3_0031 |         |          |       |                   |       |
| #                           | Pt-O    | Pt-Co    | Pt-Pt | R-factor filtered |       |
| R [Å]                       | 1,967*  | 2,647*   |       | 2,712             | 14,48 |
| error                       |         |          |       | 0,008             |       |
| s [Å]                       | 0,0707* | 0,124*   | 0,1*  |                   |       |
| error (inaccurate)          |         |          |       |                   |       |
| N                           | 0*      | 0*       |       | 11,7              |       |
| error                       |         |          |       | 0,82              |       |
| 2s2                         | 0,01*   | 0,0309*  | 0,02* |                   |       |
| error                       |         |          |       |                   |       |
| PtCoC_H3PO4_140C_Pt_L3_0032 |         |          |       |                   |       |
| #                           | Pt-O    | Pt-Co    | Pt-Pt | R-factor filtered |       |
| R [Å]                       | 1,967*  | 2,63*    |       | 2,714             | 14,48 |
| error                       |         |          |       | 0,0082            |       |
| s [Å]                       | 0,0707* | 0,0955*  | 0,1*  |                   |       |
| error (inaccurate)          |         |          |       |                   |       |
| N                           | 0*      | 0*       |       | 11,4              |       |
| error                       |         |          |       | 0,82              |       |
| 2s2                         | 0,01*   | 0,0182*  | 0,02* |                   |       |
| error                       |         |          |       |                   |       |

## PtCoC\_H3PO4\_140C\_Pt\_L3\_0033

| #                  | Pt-O   | Pt-Co   | Pt-Pt | R-factor filtered |       |
|--------------------|--------|---------|-------|-------------------|-------|
| R [Å]              | 1,967* | 2,664*  |       | 2,711             | 14,48 |
| error              |        |         |       | 0,0081            |       |
| s [Å]              | 0,1*   | 0,0852* | 0,1*  |                   |       |
| error (inaccurate) |        |         |       |                   |       |
| N                  | 0*     | 0*      |       | 11,6              |       |
| error              |        |         |       | 0,82              |       |
| 2s2                | 0,02*  | 0,0145* | 0,02* |                   |       |
| error              |        |         |       |                   |       |

## PtCoC\_H3PO4\_140C\_Pt\_L3\_0034

| #                  | Pt-O    | Pt-Co   | Pt-Pt | R-factor filtered |       |
|--------------------|---------|---------|-------|-------------------|-------|
| R [Å]              | 1,967*  | 2,666*  |       | 2,713             | 14,48 |
| error              |         |         |       | 0,0082            |       |
| s [Å]              | 0,0778* | 0,108*  | 0,1*  |                   |       |
| error (inaccurate) |         |         |       |                   |       |
| N                  | 0*      | 0*      |       | 11,6              |       |
| error              |         |         |       | 0,82              |       |
| 2s2                | 0,0121* | 0,0232* | 0,02* |                   |       |
| error              |         |         |       |                   |       |

## PtCoC\_H3PO4\_140C\_Pt\_L3\_0035

| #                  | Pt-O    | Pt-Co  | Pt-Pt | R-factor filtered |       |
|--------------------|---------|--------|-------|-------------------|-------|
| R [Å]              | 1,967*  | 2,646* |       | 2,716             | 14,48 |
| error              |         |        |       | 0,0081            |       |
| s [Å]              | 0,0707* | 0,114* | 0,1*  |                   |       |
| error (inaccurate) |         |        |       |                   |       |
| N                  | 0*      | 0*     |       | 11,6              |       |
| error              |         |        |       | 0,82              |       |
| 2s2                | 0,01*   | 0,026* | 0,02* |                   |       |
| error              |         |        |       |                   |       |

## PtCoC\_H3PO4\_140C\_Pt\_L3\_0036

| #                  | Pt-O    | Pt-Co   | Pt-Pt | R-factor filtered |       |
|--------------------|---------|---------|-------|-------------------|-------|
| R [Å]              | 1,967*  | 2,646*  |       | 2,715             | 14,48 |
| error              |         |         |       | 0,0081            |       |
| s [Å]              | 0,0707* | 0,0904* | 0,1*  |                   |       |
| error (inaccurate) |         |         |       |                   |       |
| N                  | 0*      | 0*      |       | 11,5              |       |
| error              |         |         |       | 0,82              |       |
| 2s2                | 0,01*   | 0,0163* | 0,02* |                   |       |
| error              |         |         |       |                   |       |

## PtCoC\_H3PO4\_140C\_Pt\_L3\_0037

| #     | Pt-O   | Pt-Co | Pt-Pt | R-factor filtered |       |
|-------|--------|-------|-------|-------------------|-------|
| R [Å] | 1,971* | 2,67* |       | 2,709             | 14,48 |



|                    |         |          |       |        |
|--------------------|---------|----------|-------|--------|
| error              |         |          |       | 0,0078 |
| s [Å]              | 0,0849* | 0,0503*  | 0,1*  |        |
| error (inaccurate) |         |          |       |        |
| N                  | 0*      | 0*       |       | 11,3   |
| error              |         |          |       | 0,81   |
| 2s2                | 0,0144* | 0,00507* | 0,02* |        |
| error              |         |          |       |        |

#### PtCoC\_H3PO4\_140C\_Pt\_L3\_0038

|                    |         |         |       |        |                   |
|--------------------|---------|---------|-------|--------|-------------------|
| #                  | Pt-O    | Pt-Co   | Pt-Pt |        | R-factor filtered |
| R [Å]              | 1,946*  | 2,665*  |       | 2,712  | 14,48             |
| error              |         |         |       | 0,0083 |                   |
| s [Å]              | 0,094*  | 0,0879* | 0,1*  |        |                   |
| error (inaccurate) |         |         |       |        |                   |
| N                  | 0*      | 0*      |       | 11,4   |                   |
| error              |         |         |       | 0,82   |                   |
| 2s2                | 0,0177* | 0,0155* | 0,02* |        |                   |
| error              |         |         |       |        |                   |

#### PtCoC\_H3PO4\_140C\_Pt\_L3\_0039

|                    |         |           |       |        |                   |
|--------------------|---------|-----------|-------|--------|-------------------|
| #                  | Pt-O    | Pt-Co     | Pt-Pt |        | R-factor filtered |
| R [Å]              | 1,977*  | 2,706*    |       | 2,711  | 14,48             |
| error              |         |           |       | 0,0082 |                   |
| s [Å]              | 0,141*  | 0,0102*   | 0,1*  |        |                   |
| error (inaccurate) |         |           |       |        |                   |
| N                  | 0*      | 0*        |       | 11,5   |                   |
| error              |         |           |       | 0,82   |                   |
| 2s2                | 0,0395* | 0,000206* | 0,02* |        |                   |
| error              |         |           |       |        |                   |

#### PtCoC\_H3PO4\_140C\_Pt\_L3\_0040

|                    |         |         |       |        |                   |
|--------------------|---------|---------|-------|--------|-------------------|
| #                  | Pt-O    | Pt-Co   | Pt-Pt |        | R-factor filtered |
| R [Å]              | 1,967*  | 2,684*  |       | 2,713  | 14,48             |
| error              |         |         |       | 0,0083 |                   |
| s [Å]              | 0,0707* | 0,0316* | 0,1*  |        |                   |
| error (inaccurate) |         |         |       |        |                   |
| N                  | 0*      | 0*      |       | 11,4   |                   |
| error              |         |         |       | 0,82   |                   |
| 2s2                | 0,01*   | 0,002*  | 0,02* |        |                   |
| error              |         |         |       |        |                   |

#### PtCoC\_H3PO4\_140C\_Pt\_L3\_0041

|                    |           |         |       |        |                   |
|--------------------|-----------|---------|-------|--------|-------------------|
| #                  | Pt-O      | Pt-Co   | Pt-Pt |        | R-factor filtered |
| R [Å]              | 1,96*     | 2,67*   |       | 2,711  | 13,67             |
| error              |           |         |       | 0,0078 |                   |
| s [Å]              | 0,000792* | 0,0503* | 0,1*  |        |                   |
| error (inaccurate) |           |         |       |        |                   |
| N                  | 0*        | 0*      |       | 11,2   |                   |

|                             |          |           |       |                   |       |
|-----------------------------|----------|-----------|-------|-------------------|-------|
| error                       |          |           |       | 0,81              |       |
| 2s2                         | 1,25E-6* | 0,00507*  | 0,02* |                   |       |
| error                       |          |           |       |                   |       |
| PtCoC_H3PO4_140C_Pt_L3_0042 |          |           |       |                   |       |
| #                           | Pt-O     | Pt-Co     | Pt-Pt | R-factor filtered |       |
| R [Å]                       | 2,144*   | 2,665*    |       | 2,714             | 13,67 |
| error                       |          |           |       | 0,0084            |       |
| s [Å]                       | 0,202*   | 0,0879*   | 0,1*  |                   |       |
| error (inaccurate)          |          |           |       |                   |       |
| N                           | 0*       | 0*        |       | 11,1              |       |
| error                       |          |           |       | 0,82              |       |
| 2s2                         | 0,0818*  | 0,0155*   | 0,02* |                   |       |
| error                       |          |           |       |                   |       |
| PtCoC_H3PO4_140C_Pt_L3_0043 |          |           |       |                   |       |
| #                           | Pt-O     | Pt-Co     | Pt-Pt | R-factor filtered |       |
| R [Å]                       | 1,977*   | 2,706*    |       | 2,712             | 13,67 |
| error                       |          |           |       | 0,0083            |       |
| s [Å]                       | 0,141*   | 0,0102*   | 0,1*  |                   |       |
| error (inaccurate)          |          |           |       |                   |       |
| N                           | 0*       | 0*        |       | 11,4              |       |
| error                       |          |           |       | 0,82              |       |
| 2s2                         | 0,0395*  | 0,000206* | 0,02* |                   |       |
| error                       |          |           |       |                   |       |
| PtCoC_H3PO4_140C_Pt_L3_0044 |          |           |       |                   |       |
| #                           | Pt-O     | Pt-Co     | Pt-Pt | R-factor filtered |       |
| R [Å]                       | 1,967*   | 2,684*    |       | 2,713             | 13,67 |
| error                       |          |           |       | 0,0082            |       |
| s [Å]                       | 0,0707*  | 0,0316*   | 0,1*  |                   |       |
| error (inaccurate)          |          |           |       |                   |       |
| N                           | 0*       | 0*        |       | 11,4              |       |
| error                       |          |           |       | 0,82              |       |
| 2s2                         | 0,01*    | 0,002*    | 0,02* |                   |       |
| error                       |          |           |       |                   |       |
| PtCoC_H3PO4_140C_Pt_L3_0045 |          |           |       |                   |       |
| #                           | Pt-O     | Pt-Co     | Pt-Pt | R-factor filtered |       |
| R [Å]                       | 1,967*   | 2,682*    |       | 2,716             | 13,67 |
| error                       |          |           |       | 0,0083            |       |
| s [Å]                       | 0,0707*  | 0,0687*   | 0,1*  |                   |       |
| error (inaccurate)          |          |           |       |                   |       |
| N                           | 0*       | 0*        |       | 11,4              |       |
| error                       |          |           |       | 0,82              |       |
| 2s2                         | 0,01*    | 0,00945*  | 0,02* |                   |       |
| error                       |          |           |       |                   |       |

## PtCoC\_H3PO4\_140C\_Pt\_L3\_0046

| #                  | Pt-O    | Pt-Co   | Pt-Pt | R-factor filtered |       |
|--------------------|---------|---------|-------|-------------------|-------|
| R [Å]              | 1,967*  | 2,672*  |       | 2,712             | 13,67 |
| error              |         |         |       | 0,0077            |       |
| s [Å]              | 0,209*  | 0,0316* | 0,1*  |                   |       |
| error (inaccurate) |         |         |       |                   |       |
| N                  | 0*      | 0*      |       | 11,5              |       |
| error              |         |         |       | 0,81              |       |
| 2s2                | 0,0872* | 0,002*  | 0,02* |                   |       |
| error              |         |         |       |                   |       |

## PtCoC\_H3PO4\_140C\_Pt\_L3\_0047

| #                  | Pt-O    | Pt-Co   | Pt-Pt | R-factor filtered |       |
|--------------------|---------|---------|-------|-------------------|-------|
| R [Å]              | 1,967*  | 2,659*  |       | 2,712             | 13,67 |
| error              |         |         |       | 0,0083            |       |
| s [Å]              | 0,0778* | 0,0929* | 0,1*  |                   |       |
| error (inaccurate) |         |         |       |                   |       |
| N                  | 0*      | 0*      |       | 11,4              |       |
| error              |         |         |       | 0,82              |       |
| 2s2                | 0,0121* | 0,0173* | 0,02* |                   |       |
| error              |         |         |       |                   |       |

## PtCoC\_H3PO4\_140C\_Pt\_L3\_0048

| #                  | Pt-O    | Pt-Co   | Pt-Pt | R-factor filtered |       |
|--------------------|---------|---------|-------|-------------------|-------|
| R [Å]              | 1,967*  | 2,647*  |       | 2,713             | 13,67 |
| error              |         |         |       | 0,0083            |       |
| s [Å]              | 0,0707* | 0,124*  | 0,1*  |                   |       |
| error (inaccurate) |         |         |       |                   |       |
| N                  | 0*      | 0*      |       | 11,3              |       |
| error              |         |         |       | 0,82              |       |
| 2s2                | 0,01*   | 0,0309* | 0,02* |                   |       |
| error              |         |         |       |                   |       |

## PtCoC\_H3PO4\_140C\_Pt\_L3\_0049

| #                  | Pt-O    | Pt-Co   | Pt-Pt | R-factor filtered |       |
|--------------------|---------|---------|-------|-------------------|-------|
| R [Å]              | 1,967*  | 2,63*   |       | 2,714             | 13,67 |
| error              |         |         |       | 0,008             |       |
| s [Å]              | 0,0707* | 0,0955* | 0,1*  |                   |       |
| error (inaccurate) |         |         |       |                   |       |
| N                  | 0*      | 0*      |       | 11,9              |       |
| error              |         |         |       | 0,82              |       |
| 2s2                | 0,01*   | 0,0182* | 0,02* |                   |       |
| error              |         |         |       |                   |       |

## PtCoC\_H3PO4\_140C\_Pt\_L3\_0050

| #     | Pt-O   | Pt-Co  | Pt-Pt | R-factor filtered |       |
|-------|--------|--------|-------|-------------------|-------|
| R [Å] | 1,967* | 2,664* |       | 2,712             | 13,67 |
| error |        |        |       | 0,0083            |       |

|                             |         |         |       |                   |       |
|-----------------------------|---------|---------|-------|-------------------|-------|
| s [Å]                       | 0,1*    | 0,0852* | 0,1*  |                   |       |
| error (inaccurate)          |         |         |       |                   |       |
| N                           | 0*      | 0*      |       | 11,4              |       |
| error                       |         |         |       | 0,82              |       |
| 2s2                         | 0,02*   | 0,0145* | 0,02* |                   |       |
| error                       |         |         |       |                   |       |
| PtCoC_H3PO4_140C_Pt_L3_0051 |         |         |       |                   |       |
| #                           | Pt-O    | Pt-Co   | Pt-Pt | R-factor filtered |       |
| R [Å]                       | 1,967*  | 2,666*  |       | 2,716             | 13,67 |
| error                       |         |         |       | 0,0084            |       |
| s [Å]                       | 0,0778* | 0,108*  | 0,1*  |                   |       |
| error (inaccurate)          |         |         |       |                   |       |
| N                           | 0*      | 0*      |       | 11,3              |       |
| error                       |         |         |       | 0,82              |       |
| 2s2                         | 0,0121* | 0,0232* | 0,02* |                   |       |
| error                       |         |         |       |                   |       |
| PtCoC_H3PO4_140C_Pt_L3_0052 |         |         |       |                   |       |
| #                           | Pt-O    | Pt-Co   | Pt-Pt | R-factor filtered |       |
| R [Å]                       | 1,967*  | 2,646*  |       | 2,71              | 13,67 |
| error                       |         |         |       | 0,0081            |       |
| s [Å]                       | 0,0707* | 0,114*  | 0,1*  |                   |       |
| error (inaccurate)          |         |         |       |                   |       |
| N                           | 0*      | 0*      |       | 11,6              |       |
| error                       |         |         |       | 0,82              |       |
| 2s2                         | 0,01*   | 0,026*  | 0,02* |                   |       |
| error                       |         |         |       |                   |       |
| PtCoC_H3PO4_140C_Pt_L3_0053 |         |         |       |                   |       |
| #                           | Pt-O    | Pt-Co   | Pt-Pt | R-factor filtered |       |
| R [Å]                       | 1,967*  | 2,646*  |       | 2,714             | 13,67 |
| error                       |         |         |       | 0,008             |       |
| s [Å]                       | 0,0707* | 0,0904* | 0,1*  |                   |       |
| error (inaccurate)          |         |         |       |                   |       |
| N                           | 0*      | 0*      |       | 11,6              |       |
| error                       |         |         |       | 0,82              |       |
| 2s2                         | 0,01*   | 0,0163* | 0,02* |                   |       |
| error                       |         |         |       |                   |       |
| PtCoC_H3PO4_140C_Pt_L3_0054 |         |         |       |                   |       |
| #                           | Pt-O    | Pt-Co   | Pt-Pt | R-factor filtered |       |
| R [Å]                       | 1,971*  | 2,67*   |       | 2,713             | 13,67 |
| error                       |         |         |       | 0,0077            |       |
| s [Å]                       | 0,0849* | 0,0503* | 0,1*  |                   |       |
| error (inaccurate)          |         |         |       |                   |       |
| N                           | 0*      | 0*      |       | 11,4              |       |
| error                       |         |         |       | 0,81              |       |

|       |         |          |       |
|-------|---------|----------|-------|
| 2s2   | 0,0144* | 0,00507* | 0,02* |
| error |         |          |       |

#### PtCoC\_H3PO4\_140C\_Pt\_L3\_0055

| #                  | Pt-O    | Pt-Co   | Pt-Pt | R-factor filtered |       |
|--------------------|---------|---------|-------|-------------------|-------|
| R [Å]              | 1,946*  | 2,665*  |       | 2,711             | 13,67 |
| error              |         |         |       | 0,0081            |       |
| s [Å]              | 0,094*  | 0,0879* | 0,1*  |                   |       |
| error (inaccurate) |         |         |       |                   |       |
| N                  | 0*      | 0*      |       | 11,5              |       |
| error              |         |         |       | 0,82              |       |
| 2s2                | 0,0177* | 0,0155* | 0,02* |                   |       |
| error              |         |         |       |                   |       |

#### PtCoC\_H3PO4\_140C\_Pt\_L3\_0056

| #                  | Pt-O    | Pt-Co     | Pt-Pt | R-factor filtered |       |
|--------------------|---------|-----------|-------|-------------------|-------|
| R [Å]              | 1,977*  | 2,706*    |       | 2,713             | 13,67 |
| error              |         |           |       | 0,0082            |       |
| s [Å]              | 0,141*  | 0,0102*   | 0,1*  |                   |       |
| error (inaccurate) |         |           |       |                   |       |
| N                  | 0*      | 0*        |       | 11,5              |       |
| error              |         |           |       | 0,82              |       |
| 2s2                | 0,0395* | 0,000206* | 0,02* |                   |       |
| error              |         |           |       |                   |       |

#### PtCoC\_H3PO4\_140C\_Pt\_L3\_0057

| #                  | Pt-O    | Pt-Co   | Pt-Pt | R-factor filtered |       |
|--------------------|---------|---------|-------|-------------------|-------|
| R [Å]              | 1,967*  | 2,684*  |       | 2,713             | 13,67 |
| error              |         |         |       | 0,0083            |       |
| s [Å]              | 0,0707* | 0,0316* | 0,1*  |                   |       |
| error (inaccurate) |         |         |       |                   |       |
| N                  | 0*      | 0*      |       | 11,4              |       |
| error              |         |         |       | 0,82              |       |
| 2s2                | 0,01*   | 0,002*  | 0,02* |                   |       |
| error              |         |         |       |                   |       |

#### PtCoC\_H3PO4\_140C\_Pt\_L3\_0058

| #                  | Pt-O    | Pt-Co    | Pt-Pt | R-factor filtered |       |
|--------------------|---------|----------|-------|-------------------|-------|
| R [Å]              | 1,967*  | 2,682*   |       | 2,713             | 13,67 |
| error              |         |          |       | 0,0082            |       |
| s [Å]              | 0,0707* | 0,0687*  | 0,1*  |                   |       |
| error (inaccurate) |         |          |       |                   |       |
| N                  | 0*      | 0*       |       | 11,4              |       |
| error              |         |          |       | 0,82              |       |
| 2s2                | 0,01*   | 0,00945* | 0,02* |                   |       |
| error              |         |          |       |                   |       |

#### PtCoC\_H3PO4\_140C\_Pt\_L3\_0059

| #                  | Pt-O    | Pt-Co   | Pt-Pt | R-factor filtered |       |
|--------------------|---------|---------|-------|-------------------|-------|
| R [Å]              | 1,967*  | 2,672*  |       | 2,713             | 13,67 |
| error              |         |         |       | 0,0077            |       |
| s [Å]              | 0,209*  | 0,0316* | 0,1*  |                   |       |
| error (inaccurate) |         |         |       |                   |       |
| N                  | 0*      | 0*      |       | 11,3              |       |
| error              |         |         |       | 0,81              |       |
| 2s2                | 0,0872* | 0,002*  | 0,02* |                   |       |
| error              |         |         |       |                   |       |

#### PtCoC\_H3PO4\_140C\_Pt\_L3\_0060

| #                  | Pt-O    | Pt-Co   | Pt-Pt | R-factor filtered |       |
|--------------------|---------|---------|-------|-------------------|-------|
| R [Å]              | 1,967*  | 2,659*  |       | 2,709             | 13,67 |
| error              |         |         |       | 0,0084            |       |
| s [Å]              | 0,0778* | 0,0929* | 0,1*  |                   |       |
| error (inaccurate) |         |         |       |                   |       |
| N                  | 0*      | 0*      |       | 11,1              |       |
| error              |         |         |       | 0,82              |       |
| 2s2                | 0,0121* | 0,0173* | 0,02* |                   |       |
| error              |         |         |       |                   |       |

#### PtCoC\_H3PO4\_140C\_Pt\_L3\_0061

| #                  | Pt-O    | Pt-Co   | Pt-Pt | R-factor filtered |       |
|--------------------|---------|---------|-------|-------------------|-------|
| R [Å]              | 1,967*  | 2,647*  |       | 2,71              | 13,67 |
| error              |         |         |       | 0,0084            |       |
| s [Å]              | 0,0707* | 0,124*  | 0,1*  |                   |       |
| error (inaccurate) |         |         |       |                   |       |
| N                  | 0*      | 0*      |       | 11,3              |       |
| error              |         |         |       | 0,82              |       |
| 2s2                | 0,01*   | 0,0309* | 0,02* |                   |       |
| error              |         |         |       |                   |       |

#### PtCoC\_H3PO4\_140C\_Pt\_L3\_0062

| #                  | Pt-O    | Pt-Co   | Pt-Pt | R-factor filtered |       |
|--------------------|---------|---------|-------|-------------------|-------|
| R [Å]              | 1,967*  | 2,63*   |       | 2,711             | 13,67 |
| error              |         |         |       | 0,008             |       |
| s [Å]              | 0,0707* | 0,0955* | 0,1*  |                   |       |
| error (inaccurate) |         |         |       |                   |       |
| N                  | 0*      | 0*      |       | 11,7              |       |
| error              |         |         |       | 0,82              |       |
| 2s2                | 0,01*   | 0,0182* | 0,02* |                   |       |
| error              |         |         |       |                   |       |

#### PtCoC\_H3PO4\_140C\_Pt\_L3\_0063

| #     | Pt-O   | Pt-Co   | Pt-Pt | R-factor filtered |       |
|-------|--------|---------|-------|-------------------|-------|
| R [Å] | 1,967* | 2,664*  |       | 2,712             | 13,67 |
| error |        |         |       | 0,0081            |       |
| s [Å] | 0,1*   | 0,0852* | 0,1*  |                   |       |

|                             |         |          |       |                   |       |
|-----------------------------|---------|----------|-------|-------------------|-------|
| error (inaccurate)          |         |          |       |                   |       |
| N                           | 0*      | 0*       |       | 11,7              |       |
| error                       |         |          |       | 0,82              |       |
| 2s2                         | 0,02*   | 0,0145*  | 0,02* |                   |       |
| error                       |         |          |       |                   |       |
| PtCoC_H3PO4_140C_Pt_L3_0064 |         |          |       |                   |       |
| #                           | Pt-O    | Pt-Co    | Pt-Pt | R-factor filtered |       |
| R [Å]                       | 1,967*  | 2,666*   |       | 2,713             | 13,67 |
| error                       |         |          |       | 0,008             |       |
| s [Å]                       | 0,0778* | 0,108*   | 0,1*  |                   |       |
| error (inaccurate)          |         |          |       |                   |       |
| N                           | 0*      | 0*       |       | 11,7              |       |
| error                       |         |          |       | 0,82              |       |
| 2s2                         | 0,0121* | 0,0232*  | 0,02* |                   |       |
| error                       |         |          |       |                   |       |
| PtCoC_H3PO4_140C_Pt_L3_0065 |         |          |       |                   |       |
| #                           | Pt-O    | Pt-Co    | Pt-Pt | R-factor filtered |       |
| R [Å]                       | 1,967*  | 2,646*   |       | 2,712             | 13,67 |
| error                       |         |          |       | 0,0083            |       |
| s [Å]                       | 0,0707* | 0,114*   | 0,1*  |                   |       |
| error (inaccurate)          |         |          |       |                   |       |
| N                           | 0*      | 0*       |       | 11,3              |       |
| error                       |         |          |       | 0,82              |       |
| 2s2                         | 0,01*   | 0,026*   | 0,02* |                   |       |
| error                       |         |          |       |                   |       |
| PtCoC_H3PO4_140C_Pt_L3_0066 |         |          |       |                   |       |
| #                           | Pt-O    | Pt-Co    | Pt-Pt | R-factor filtered |       |
| R [Å]                       | 1,967*  | 2,646*   |       | 2,713             | 13,67 |
| error                       |         |          |       | 0,0081            |       |
| s [Å]                       | 0,0707* | 0,0904*  | 0,1*  |                   |       |
| error (inaccurate)          |         |          |       |                   |       |
| N                           | 0*      | 0*       |       | 11,5              |       |
| error                       |         |          |       | 0,82              |       |
| 2s2                         | 0,01*   | 0,0163*  | 0,02* |                   |       |
| error                       |         |          |       |                   |       |
| PtCoC_H3PO4_140C_Pt_L3_0067 |         |          |       |                   |       |
| #                           | Pt-O    | Pt-Co    | Pt-Pt | R-factor filtered |       |
| R [Å]                       | 1,971*  | 2,67*    |       | 2,715             | 13,67 |
| error                       |         |          |       | 0,0076            |       |
| s [Å]                       | 0,085*  | 0,0503*  | 0,1*  |                   |       |
| error (inaccurate)          |         |          |       |                   |       |
| N                           | 0*      | 0*       |       | 11,4              |       |
| error                       |         |          |       | 0,81              |       |
| 2s2                         | 0,0144* | 0,00507* | 0,02* |                   |       |

error

PtCoC\_H3PO4\_140C\_Pt\_L3\_0068

| #                  | Pt-O    | Pt-Co   | Pt-Pt | R-factor filtered |       |
|--------------------|---------|---------|-------|-------------------|-------|
| R [Å]              | 1,946*  | 2,665*  |       | 2,711             | 13,67 |
| error              |         |         |       | 0,0082            |       |
| s [Å]              | 0,094*  | 0,0879* | 0,1*  |                   |       |
| error (inaccurate) |         |         |       |                   |       |
| N                  | 0*      | 0*      |       | 11,5              |       |
| error              |         |         |       | 0,82              |       |
| 2s2                | 0,0177* | 0,0155* | 0,02* |                   |       |
| error              |         |         |       |                   |       |

PtCoC\_H3PO4\_140C\_Pt\_L3\_0069

| #                  | Pt-O    | Pt-Co     | Pt-Pt | R-factor filtered |       |
|--------------------|---------|-----------|-------|-------------------|-------|
| R [Å]              | 1,977*  | 2,706*    |       | 2,711             | 13,67 |
| error              |         |           |       | 0,0081            |       |
| s [Å]              | 0,141*  | 0,0102*   | 0,1*  |                   |       |
| error (inaccurate) |         |           |       |                   |       |
| N                  | 0*      | 0*        |       | 11,5              |       |
| error              |         |           |       | 0,82              |       |
| 2s2                | 0,0395* | 0,000206* | 0,02* |                   |       |
| error              |         |           |       |                   |       |

PtCoC\_H3PO4\_140C\_Pt\_L3\_0070

| #                  | Pt-O    | Pt-Co   | Pt-Pt | R-factor filtered |       |
|--------------------|---------|---------|-------|-------------------|-------|
| R [Å]              | 1,967*  | 2,684*  |       | 2,71              | 13,67 |
| error              |         |         |       | 0,0044            |       |
| s [Å]              | 0,0707* | 0,0316* | 0,1*  |                   |       |
| error (inaccurate) |         |         |       |                   |       |
| N                  | 0*      | 0*      |       | 11,3              |       |
| error              |         |         |       | 0,82              |       |
| 2s2                | 0,01*   | 0,002*  | 0,02* |                   |       |
| error              |         |         |       |                   |       |

PtCoC\_H3PO4\_140C\_Pt\_L3\_0071

| #                  | Pt-O    | Pt-Co    | Pt-Pt | R-factor filtered |       |
|--------------------|---------|----------|-------|-------------------|-------|
| R [Å]              | 1,967*  | 2,682*   |       | 2,714             | 13,67 |
| error              |         |          |       | 0,0083            |       |
| s [Å]              | 0,0707* | 0,0687*  | 0,1*  |                   |       |
| error (inaccurate) |         |          |       |                   |       |
| N                  | 0*      | 0*       |       | 11,2              |       |
| error              |         |          |       | 0,82              |       |
| 2s2                | 0,01*   | 0,00945* | 0,02* |                   |       |
| error              |         |          |       |                   |       |

PtCoC\_H3PO4\_140C\_Pt\_L3\_0072

| # | Pt-O | Pt-Co | Pt-Pt | R-factor filtered |  |
|---|------|-------|-------|-------------------|--|
|---|------|-------|-------|-------------------|--|



|                    |         |         |       |        |       |
|--------------------|---------|---------|-------|--------|-------|
| R [Å]              | 1,967*  | 2,672*  |       | 2,712  | 13,67 |
| error              |         |         |       | 0,0076 |       |
| s [Å]              | 0,209*  | 0,0316* | 0,1*  |        |       |
| error (inaccurate) |         |         |       |        |       |
| N                  | 0*      | 0*      |       | 11,5   |       |
| error              |         |         |       | 0,81   |       |
| 2s2                | 0,0872* | 0,002*  | 0,02* |        |       |
| error              |         |         |       |        |       |

#### PtCoC\_H3PO4\_140C\_Pt\_L3\_0073

|                    |         |         |       |        |                   |
|--------------------|---------|---------|-------|--------|-------------------|
| #                  | Pt-O    | Pt-Co   | Pt-Pt |        | R-factor filtered |
| R [Å]              | 1,967*  | 2,659*  |       | 2,713  | 13,67             |
| error              |         |         |       | 0,0084 |                   |
| s [Å]              | 0,0778* | 0,0929* | 0,1*  |        |                   |
| error (inaccurate) |         |         |       |        |                   |
| N                  | 0*      | 0*      |       | 11,3   |                   |
| error              |         |         |       | 0,82   |                   |
| 2s2                | 0,0121* | 0,0173* | 0,02* |        |                   |
| error              |         |         |       |        |                   |

#### PtCoC\_H3PO4\_140C\_Pt\_L3\_0074

|                    |         |         |       |       |                   |
|--------------------|---------|---------|-------|-------|-------------------|
| #                  | Pt-O    | Pt-Co   | Pt-Pt |       | R-factor filtered |
| R [Å]              | 1,967*  | 2,647*  |       | 2,714 | 13,67             |
| error              |         |         |       | 0,008 |                   |
| s [Å]              | 0,0707* | 0,124*  | 0,1*  |       |                   |
| error (inaccurate) |         |         |       |       |                   |
| N                  | 0*      | 0*      |       | 11,6  |                   |
| error              |         |         |       | 0,82  |                   |
| 2s2                | 0,01*   | 0,0309* | 0,02* |       |                   |
| error              |         |         |       |       |                   |

#### PtCoC\_H3PO4\_140C\_Pt\_L3\_0075

|                    |         |         |       |        |                   |
|--------------------|---------|---------|-------|--------|-------------------|
| #                  | Pt-O    | Pt-Co   | Pt-Pt |        | R-factor filtered |
| R [Å]              | 1,967*  | 2,63*   |       | 2,717  | 13,67             |
| error              |         |         |       | 0,0082 |                   |
| s [Å]              | 0,0707* | 0,0955* | 0,1*  |        |                   |
| error (inaccurate) |         |         |       |        |                   |
| N                  | 0*      | 0*      |       | 11,3   |                   |
| error              |         |         |       | 0,82   |                   |
| 2s2                | 0,01*   | 0,0182* | 0,02* |        |                   |
| error              |         |         |       |        |                   |

#### PtCoC\_H3PO4\_140C\_Pt\_L3\_0076

|                    |        |         |       |        |                   |
|--------------------|--------|---------|-------|--------|-------------------|
| #                  | Pt-O   | Pt-Co   | Pt-Pt |        | R-factor filtered |
| R [Å]              | 1,967* | 2,664*  |       | 2,714  | 13,67             |
| error              |        |         |       | 0,0084 |                   |
| s [Å]              | 0,1*   | 0,0852* | 0,1*  |        |                   |
| error (inaccurate) |        |         |       |        |                   |

|       |       |         |       |      |
|-------|-------|---------|-------|------|
| N     | 0*    | 0*      |       | 11,1 |
| error |       |         |       | 0,82 |
| 2s2   | 0,02* | 0,0145* | 0,02* |      |
| error |       |         |       |      |

#### PtCoC\_H3PO4\_140C\_Pt\_L3\_0077

|                    |         |         |       |        |                   |
|--------------------|---------|---------|-------|--------|-------------------|
| #                  | Pt-O    | Pt-Co   | Pt-Pt |        | R-factor filtered |
| R [Å]              | 1,967*  | 2,666*  |       | 2,714  | 13,67             |
| error              |         |         |       | 0,0081 |                   |
| s [Å]              | 0,0778* | 0,108*  | 0,1*  |        |                   |
| error (inaccurate) |         |         |       |        |                   |
| N                  | 0*      | 0*      |       | 11,6   |                   |
| error              |         |         |       | 0,82   |                   |
| 2s2                | 0,0121* | 0,0232* | 0,02* |        |                   |
| error              |         |         |       |        |                   |

#### PtCoC\_H3PO4\_140C\_Pt\_L3\_0078

|                    |         |        |       |        |                   |
|--------------------|---------|--------|-------|--------|-------------------|
| #                  | Pt-O    | Pt-Co  | Pt-Pt |        | R-factor filtered |
| R [Å]              | 1,967*  | 2,646* |       | 2,714  | 13,67             |
| error              |         |        |       | 0,0081 |                   |
| s [Å]              | 0,0707* | 0,114* | 0,1*  |        |                   |
| error (inaccurate) |         |        |       |        |                   |
| N                  | 0*      | 0*     |       | 11,5   |                   |
| error              |         |        |       | 0,82   |                   |
| 2s2                | 0,01*   | 0,026* | 0,02* |        |                   |
| error              |         |        |       |        |                   |

#### PtCoC\_H3PO4\_140C\_Pt\_L3\_0079

|                    |         |         |       |        |                   |
|--------------------|---------|---------|-------|--------|-------------------|
| #                  | Pt-O    | Pt-Co   | Pt-Pt |        | R-factor filtered |
| R [Å]              | 1,967*  | 2,646*  |       | 2,713  | 13,67             |
| error              |         |         |       | 0,0084 |                   |
| s [Å]              | 0,0707* | 0,0904* | 0,1*  |        |                   |
| error (inaccurate) |         |         |       |        |                   |
| N                  | 0*      | 0*      |       | 11,2   |                   |
| error              |         |         |       | 0,82   |                   |
| 2s2                | 0,01*   | 0,0163* | 0,02* |        |                   |
| error              |         |         |       |        |                   |

| Sample                   | Time 3 min per scan * number of average file<br>min |
|--------------------------|-----------------------------------------------------|
| PtCoC_dry_Co_K           |                                                     |
| PtCoC_dry_140C_Co_K      |                                                     |
| PtCoC_H3PO4_140C_1       | 21                                                  |
| PtCoC_H3PO4_140C_Co_K_2  | 39                                                  |
| PtCoC_H3PO4_140C_Co_K_3  | 57                                                  |
| PtCoC_H3PO4_140C_Co_K_4  | 75                                                  |
| PtCoC_H3PO4_140C_Co_K_5  | 93                                                  |
| PtCoC_H3PO4_140C_Co_K_6  | 111                                                 |
| PtCoC_H3PO4_140C_Co_K_7  | 129                                                 |
| PtCoC_H3PO4_140C_Co_K_8  | 147                                                 |
| PtCoC_H3PO4_140C_Co_K_9  | 165                                                 |
| PtCoC_H3PO4_140C_Co_K_10 | 183                                                 |
| PtCoC_H3PO4_140C_Co_K_11 | 201                                                 |
| PtCoC_H3PO4_140C_Co_K_12 | 219                                                 |
| PtCoC_H3PO4_140C_Co_K_13 | 240                                                 |

## PtCoC\_dry\_Co\_K

| #                  | Co-O    | Co-Co | Co-Pt  | R-factor filtered |
|--------------------|---------|-------|--------|-------------------|
| R [Å]              | 2,026   | 2,634 | 2,687  | 17,5              |
| error              | 0,022   | 0,021 | 0,009  |                   |
| s [Å]              | 0,0316* | 0,1*  | 0,0866 |                   |
| error (inaccurate) |         |       | 0,0095 |                   |
| N                  | 0,668   | 2,09  | 4,67   |                   |
| error              | 0,2     | 0,46  | 1,4    |                   |
| 2s2                | 0,002*  | 0,02* | 0,015  |                   |
| error              |         |       | 0,0033 |                   |

## PtCoC\_dry\_140C\_Co\_K

| #                  | Co-O    | Co-Co | Co-Pt  | R-factor filtered |
|--------------------|---------|-------|--------|-------------------|
| R [Å]              | 2,03    | 2,643 | 2,692  | 17,5              |
| error              | 0,027   | 0,028 | 0,012  |                   |
| s [Å]              | 0,0316* | 0,1*  | 0,0948 |                   |
| error (inaccurate) |         |       | 0,0099 |                   |
| N                  | 0,544   | 1,42  | 4,65   |                   |
| error              | 0,2     | 0,46  | 1,5    |                   |
| 2s2                | 0,002*  | 0,02* | 0,018  |                   |
| error              |         |       | 0,0037 |                   |

## PtCoC\_H3PO4\_140C\_1

| #                  | Co-O    | Co-Co | Co-Pt  | R-factor filtered |
|--------------------|---------|-------|--------|-------------------|
| R [Å]              | 2,025   | 2,637 | 2,674  | 17,5              |
| error              | 0,016   | 0,019 | 0,017  |                   |
| s [Å]              | 0,0316* | 0,1*  | 0,107  |                   |
| error (inaccurate) |         |       | 0,01   |                   |
| N                  | 0,949   | 2,03  | 5,06   |                   |
| error              | 0,2     | 0,48  | 1,6    |                   |
| 2s2                | 0,002*  | 0,02* | 0,0228 |                   |
| error              |         |       | 0,0044 |                   |

## PtCoC\_H3PO4\_140C\_Co\_K\_2

| #                  | Co-O    | Co-Co | Co-Pt  | R-factor filtered |
|--------------------|---------|-------|--------|-------------------|
| R [Å]              | 2,032   | 2,652 | 2,685  | 17,5              |
| error              | 0,024   | 0,029 | 0,013  |                   |
| s [Å]              | 0,0316* | 0,1*  | 0,101  |                   |
| error (inaccurate) |         |       | 0,0088 |                   |
| N                  | 0,609   | 1,32  | 5,32   |                   |
| error              | 0,2     | 0,48  | 1,5    |                   |
| 2s2                | 0,002*  | 0,02* | 0,0202 |                   |
| error              |         |       | 0,0035 |                   |

## PtCoC\_H3PO4\_140C\_Co\_K\_3

| #     | Co-O  | Co-Co | Co-Pt | R-factor filtered |
|-------|-------|-------|-------|-------------------|
| R [Å] | 2,025 | 2,643 | 2,66  | 17,5              |
| error | 0,032 | 0,019 | 0,012 |                   |

|                    |         |       |        |
|--------------------|---------|-------|--------|
| s [Å]              | 0,0316* | 0,1*  | 0,0949 |
| error (inaccurate) |         |       | 0,0092 |
| N                  | 0,446   | 2,21  | 4,61   |
| error              | 0,21    | 0,47  | 1,4    |
| 2s2                | 0,002*  | 0,02* | 0,018  |
| error              |         |       | 0,0035 |

#### PtCoC\_H3PO4\_140C\_Co\_K\_4

| #                  | Co-O    | Co-Co | Co-Pt  | R-factor filtered |
|--------------------|---------|-------|--------|-------------------|
| R [Å]              | 2,022   | 2,647 | 2,698  | 17,5              |
| error              | 0,027   | 0,019 | 0,013  |                   |
| s [Å]              | 0,0316* | 0,1*  | 0,097  |                   |
| error (inaccurate) |         |       | 0,01   |                   |
| N                  | 0,527   | 2,24  | 4,72   |                   |
| error              | 0,2     | 0,47  | 1,5    |                   |
| 2s2                | 0,002*  | 0,02* | 0,0188 |                   |
| error              |         |       | 0,0039 |                   |

#### PtCoC\_H3PO4\_140C\_Co\_K\_5

| #                  | Co-O    | Co-Co | Co-Pt  | R-factor filtered |
|--------------------|---------|-------|--------|-------------------|
| R [Å]              | 2,025*  | 2,618 | 2,651  | 17,5              |
| error              |         | 0,019 | 0,01   |                   |
| s [Å]              | 0,0316* | 0,1*  | 0,0936 |                   |
| error (inaccurate) |         |       | 0,009  |                   |
| N                  | 0*      | 2,35  | 4,89   |                   |
| error              |         | 0,46  | 1,4    |                   |
| 2s2                | 0,002*  | 0,02* | 0,0175 |                   |
| error              |         |       | 0,0034 |                   |

#### PtCoC\_H3PO4\_140C\_Co\_K\_6

| #                  | Co-O    | Co-Co | Co-Pt  | R-factor filtered |
|--------------------|---------|-------|--------|-------------------|
| R [Å]              | 2,02    | 2,643 | 2,695  | 17,5              |
| error              | 0,039   | 0,025 | 0,011  |                   |
| s [Å]              | 0,0316* | 0,1*  | 0,0952 |                   |
| error (inaccurate) |         |       | 0,009  |                   |
| N                  | 0,354   | 1,62  | 5,15   |                   |
| error              | 0,2     | 0,46  | 1,5    |                   |
| 2s2                | 0,002*  | 0,02* | 0,018  |                   |
| error              |         |       | 0,003  |                   |

#### PtCoC\_H3PO4\_140C\_Co\_K\_7

| #                  | Co-O    | Co-Co | Co-Pt  | R-factor filtered |
|--------------------|---------|-------|--------|-------------------|
| R [Å]              | 2,081   | 2,647 | 2,667  | 17,5              |
| error              | 0,023   | 0,021 | 0,011  |                   |
| s [Å]              | 0,0316* | 0,1*  | 0,102  |                   |
| error (inaccurate) |         |       | 0,0074 |                   |
| N                  | 0,683   | 1,92  | 6,42   |                   |
| error              | 0,22    | 0,49  | 1,5    |                   |

|       |        |       |        |
|-------|--------|-------|--------|
| 2s2   | 0,002* | 0,02* | 0,0207 |
| error |        |       | 0,003  |

#### PtCoC\_H3PO4\_140C\_Co\_K\_8

| #                  | Co-O    | Co-Co | Co-Pt  | R-factor filtered |
|--------------------|---------|-------|--------|-------------------|
| R [Å]              | 2,002   | 2,607 | 2,703  | 17,5              |
| error              | 0,038   | 0,018 | 0,016  |                   |
| s [Å]              | 0,0316* | 0,1*  | 0,114  |                   |
| error (inaccurate) |         |       | 0,01   |                   |
| N                  | 0,356   | 1,99  | 6,53   |                   |
| error              | 0,2     | 0,45  | 1,8    |                   |
| 2s2                | 0,002*  | 0,02* | 0,0261 |                   |
| error              |         |       | 0,0045 |                   |

#### PtCoC\_H3PO4\_140C\_Co\_K\_9

| #                  | Co-O    | Co-Co | Co-Pt  | R-factor filtered |
|--------------------|---------|-------|--------|-------------------|
| R [Å]              | 2,033   | 2,596 | 2,758  | 17,5              |
| error              | 0,047   | 0,017 | 0,025  |                   |
| s [Å]              | 0,0316* | 0,1*  | 0,13   |                   |
| error (inaccurate) |         |       | 0,013  |                   |
| N                  | 0,295   | 1,9   | 7,24   |                   |
| error              | 0,2     | 0,44  | 2      |                   |
| 2s2                | 0,002*  | 0,02* | 0,0337 |                   |
| error              |         |       | 0,0067 |                   |

#### PtCoC\_H3PO4\_140C\_Co\_K\_10

| #                  | Co-O    | Co-Co | Co-Pt  | R-factor filtered |
|--------------------|---------|-------|--------|-------------------|
| R [Å]              | 1,95    | 2,615 | 2,711  | 17,5              |
| error              | 0,025   | 0,021 | 0,013  |                   |
| s [Å]              | 0,0316* | 0,1*  | 0,103  |                   |
| error (inaccurate) |         |       | 0,0099 |                   |
| N                  | 0,529   | 1,7   | 5,42   |                   |
| error              | 0,18    | 0,46  | 1,6    |                   |
| 2s2                | 0,002*  | 0,02* | 0,0214 |                   |
| error              |         |       | 0,0041 |                   |

#### PtCoC\_H3PO4\_140C\_Co\_K\_11

| #                  | Co-O    | Co-Co | Co-Pt  | R-factor filtered |
|--------------------|---------|-------|--------|-------------------|
| R [Å]              | 2*      | 2,578 | 2,719  | 17,5              |
| error              |         | 0,018 | 0,0096 |                   |
| s [Å]              | 0,0316* | 0,1*  | 0,0649 |                   |
| error (inaccurate) |         |       | 0,017  |                   |
| N                  | 0*      | 2,58  | 2,69   |                   |
| error              |         | 0,51  | 1,1    |                   |
| 2s2                | 0,002*  | 0,02* | 0,0084 |                   |
| error              |         |       | 0,0042 |                   |

#### PtCoC\_H3PO4\_140C\_Co\_K\_12

| #                  | Co-O    | Co-Co | Co-Pt  | R-factor filtered |
|--------------------|---------|-------|--------|-------------------|
| R [Å]              | 2,071   | 2,59  | 2,742  | 17,5              |
| error              | 0,033   | 0,018 | 0,014  |                   |
| s [Å]              | 0,0316* | 0,1*  | 0,11   |                   |
| error (inaccurate) |         |       | 0,0098 |                   |
| N                  | 0,475   | 1,91  | 6,39   |                   |
| error              | 0,21    | 0,44  | 1,7    |                   |
| 2s2                | 0,002*  | 0,02* | 0,0244 |                   |
| error              |         |       | 0,0043 |                   |

#### PtCoC\_H3PO4\_140C\_Co\_K\_13

| #                  | Co-O    | Co-Co | Co-Pt  | R-factor filtered |
|--------------------|---------|-------|--------|-------------------|
| R [Å]              | 2,063   | 2,665 | 2,684  | 17,5              |
| error              | 0,023   | 0,027 | 0,012  |                   |
| s [Å]              | 0,0316* | 0,1*  | 0,102  |                   |
| error (inaccurate) |         |       | 0,0075 |                   |
| N                  | 0,655   | 1,39  | 6,29   |                   |
| error              | 0,21    | 0,49  | 1,4    |                   |
| 2s2                | 0,002*  | 0,02* | 0,0209 |                   |
| error              |         |       | 0,0031 |                   |

$$S_{02} = 0,8129787$$



| Sample                   | Time 3 min per scan * number of average file<br>min |
|--------------------------|-----------------------------------------------------|
| Co_K_PtCoC_dry_RT        | 0                                                   |
| Co_K_PtCoC_dry_180C      | 0                                                   |
| Co_K_PtCoC_H3PO4_180C_1  | 21                                                  |
| Co_K_PtCoC_H3PO4_180C_2  | 39                                                  |
| Co_K_PtCoC_H3PO4_180C_3  | 57                                                  |
| Co_K_PtCoC_H3PO4_180C_4  | 75                                                  |
| Co_K_PtCoC_H3PO4_180C_5  | 93                                                  |
| Co_K_PtCoC_H3PO4_180C_6  | 111                                                 |
| Co_K_PtCoC_H3PO4_180C_7  | 129                                                 |
| Co_K_PtCoC_H3PO4_180C_8  | 147                                                 |
| Co_K_PtCoC_H3PO4_180C_9  | 165                                                 |
| Co_K_PtCoC_H3PO4_180C_10 | 183                                                 |
| Co_K_PtCoC_H3PO4_180C_11 | 201                                                 |
| Co_K_PtCoC_H3PO4_180C_12 | 219                                                 |
| Co_K_PtCoC_H3PO4_180C_13 | 240                                                 |

## Co\_K\_PtCoC\_dry\_RT

| #                  | Co-O    | Co-Co | Co-Pt  | R-factor filtered |
|--------------------|---------|-------|--------|-------------------|
| R [Å]              | 2,031   | 2,631 | 2,689  | 12,83             |
| error              | 0,025   | 0,022 | 0,0094 |                   |
| s [Å]              | 0,0316* | 0,1*  | 0,0899 |                   |
| error (inaccurate) |         |       | 0,0091 |                   |
| N                  | 0,603   | 1,88  | 5,03   |                   |
| error              | 0,21    | 0,47  | 1,4    |                   |
| 2s2                | 0,002*  | 0,02* | 0,0162 |                   |
| error              |         |       | 0,0032 |                   |

## Co\_K\_PtCoC\_dry\_180C

| #                  | Co-O    | Co-Co | Co-Pt  | R-factor filtered |
|--------------------|---------|-------|--------|-------------------|
| R [Å]              | 2,006   | 2,638 | 2,693  | 12,83             |
| error              | 0,029   | 0,031 | 0,012  |                   |
| s [Å]              | 0,0316* | 0,1*  | 0,0931 |                   |
| error (inaccurate) |         |       | 0,01   |                   |
| N                  | 0,482   | 1,28  | 4,51   |                   |
| error              | 0,2     | 0,46  | 1,4    |                   |
| 2s2                | 0,002*  | 0,02* | 0,0173 |                   |
| error              |         |       | 0,0037 |                   |

## Co\_K\_PtCoC\_H3PO4\_180C\_1

| #                  | Co-O    | Co-Co | Co-Pt  | R-factor filtered |
|--------------------|---------|-------|--------|-------------------|
| R [Å]              | 2*      | 2,613 | 2,667  | 12,83             |
| error              |         | 0,022 | 0,014  |                   |
| s [Å]              | 0,0316* | 0,1*  | 0,107  |                   |
| error (inaccurate) |         |       | 0,0088 |                   |
| N                  | 0*      | 1,79  | 6,1    |                   |
| error              |         | 0,47  | 1,6    |                   |
| 2s2                | 0,002*  | 0,02* | 0,0231 |                   |
| error              |         |       | 0,0038 |                   |

## Co\_K\_PtCoC\_H3PO4\_180C\_2

| #                  | Co-O    | Co-Co | Co-Pt  | R-factor filtered |
|--------------------|---------|-------|--------|-------------------|
| R [Å]              | 2,014*  | 2,621 | 2,702  | 12,83             |
| error              |         | 0,03  | 0,0091 |                   |
| s [Å]              | 0,0316* | 0,1*  | 0,0974 |                   |
| error (inaccurate) |         |       | 0,0078 |                   |
| N                  | 0*      | 1,22  | 6,3    |                   |
| error              |         | 0,46  | 1,5    |                   |
| 2s2                | 0,002*  | 0,02* | 0,019  |                   |
| error              |         |       | 0,003  |                   |

## Co\_K\_PtCoC\_H3PO4\_180C\_3

| #     | Co-O  | Co-Co | Co-Pt | R-factor filtered |
|-------|-------|-------|-------|-------------------|
| R [Å] | 2,037 | 2,628 | 2,681 | 12,83             |
| error | 0,058 | 0,02  | 0,012 |                   |

|                    |         |       |        |
|--------------------|---------|-------|--------|
| s [Å]              | 0,0316* | 0,1*  | 0,1    |
| error (inaccurate) |         |       | 0,0086 |
| N                  | 0,247   | 2,01  | 5,78   |
| error              | 0,21    | 0,46  | 1,5    |
| 2s2                | 0,002*  | 0,02* | 0,0201 |
| error              |         |       | 0,0034 |

#### Co\_K\_PtCoC\_H3PO4\_180C\_4

| #                  | Co-O    | Co-Co | Co-Pt  | R-factor filtered |
|--------------------|---------|-------|--------|-------------------|
| R [Å]              | 2,067   | 2,611 | 2,674  | 12,83             |
| error              | 0,074   | 0,019 | 0,017  |                   |
| s [Å]              | 0,0316* | 0,1*  | 0,115  |                   |
| error (inaccurate) |         |       | 0,01   |                   |
| N                  | 0,208   | 2,08  | 6,54   |                   |
| error              | 0,22    | 0,47  | 1,8    |                   |
| 2s2                | 0,002*  | 0,02* | 0,0263 |                   |
| error              |         |       | 0,0046 |                   |

#### Co\_K\_PtCoC\_H3PO4\_180C\_5

| #                  | Co-O    | Co-Co | Co-Pt  | R-factor filtered |
|--------------------|---------|-------|--------|-------------------|
| R [Å]              | 2,025*  | 2,627 | 2,681  | 12,83             |
| error              |         | 0,02  | 0,014  |                   |
| s [Å]              | 0,0316* | 0,1*  | 0,109  |                   |
| error (inaccurate) |         |       | 0,0084 |                   |
| N                  | 0*      | 1,88  | 6,63   |                   |
| error              |         | 0,47  | 1,6    |                   |
| 2s2                | 0,002*  | 0,02* | 0,0239 |                   |
| error              |         |       | 0,0036 |                   |

#### Co\_K\_PtCoC\_H3PO4\_180C\_6

| #                  | Co-O    | Co-Co | Co-Pt  | R-factor filtered |
|--------------------|---------|-------|--------|-------------------|
| R [Å]              | 2,025   | 2,582 | 2,715  | 12,83             |
| error              | 0,12    | 0,024 | 0,0086 |                   |
| s [Å]              | 0,0316* | 0,1*  | 0,0934 |                   |
| error (inaccurate) |         |       | 0,0082 |                   |
| N                  | 0,12    | 1,31  | 5,93   |                   |
| error              | 0,2     | 0,48  | 1,5    |                   |
| 2s2                | 0,002*  | 0,02* | 0,017  |                   |
| error              |         |       | 0,003  |                   |

#### Co\_K\_PtCoC\_H3PO4\_180C\_7

| #                  | Co-O    | Co-Co | Co-Pt  | R-factor filtered |
|--------------------|---------|-------|--------|-------------------|
| R [Å]              | 2,068   | 2,651 | 2,69   | 12,83             |
| error              | 0,041   | 0,024 | 0,013  |                   |
| s [Å]              | 0,0316* | 0,1*  | 0,103  |                   |
| error (inaccurate) |         |       | 0,0081 |                   |
| N                  | 0,363   | 1,59  | 6,16   |                   |
| error              | 0,21    | 0,48  | 1,5    |                   |

|       |        |       |        |
|-------|--------|-------|--------|
| 2s2   | 0,002* | 0,02* | 0,0214 |
| error |        |       | 0,0033 |

#### Co\_K\_PtCoC\_H3PO4\_180C\_8

| #                  | Co-O    | Co-Co | Co-Pt  | R-factor filtered |
|--------------------|---------|-------|--------|-------------------|
| R [Å]              | 1,974   | 2,572 | 2,715  | 12,83             |
| error              | 0,14    | 0,023 | 0,0095 |                   |
| s [Å]              | 0,0316* | 0,1*  | 0,0924 |                   |
| error (inaccurate) |         |       | 0,0092 |                   |
| N                  | 0,0918  | 1,36  | 5,3    |                   |
| error              | 0,19    | 0,47  | 1,5    |                   |
| 2s2                | 0,002*  | 0,02* | 0,0171 |                   |
| error              |         |       | 0,0034 |                   |

#### Co\_K\_PtCoC\_H3PO4\_180C\_9

| #                  | Co-O    | Co-Co | Co-Pt  | R-factor filtered |
|--------------------|---------|-------|--------|-------------------|
| R [Å]              | 2,021   | 2,615 | 2,693  | 12,83             |
| error              | 0,075   | 0,02  | 0,014  |                   |
| s [Å]              | 0,0316* | 0,1*  | 0,109  |                   |
| error (inaccurate) |         |       | 0,0094 |                   |
| N                  | 0,186   | 1,83  | 6,25   |                   |
| error              | 0,2     | 0,46  | 1,7    |                   |
| 2s2                | 0,002*  | 0,02* | 0,024  |                   |
| error              |         |       | 0,0041 |                   |

#### Co\_K\_PtCoC\_H3PO4\_180C\_10

| #                  | Co-O    | Co-Co | Co-Pt  | R-factor filtered |
|--------------------|---------|-------|--------|-------------------|
| R [Å]              | 2*      | 2,566 | 2,7    | 12,83             |
| error              |         | 0,016 | 0,0073 |                   |
| s [Å]              | 0,0316* | 0,1*  | 0,0911 |                   |
| error (inaccurate) |         |       | 0,0095 |                   |
| N                  | 0*      | 1,66  | 4,89   |                   |
| error              |         | 0,48  | 1,5    |                   |
| 2s2                | 0,002*  | 0,02* | 0,0166 |                   |
| error              |         |       | 0,0034 |                   |

#### Co\_K\_PtCoC\_H3PO4\_180C\_11

| #                  | Co-O    | Co-Co | Co-Pt  | R-factor filtered |
|--------------------|---------|-------|--------|-------------------|
| R [Å]              | 2*      | 2,594 | 2,707  | 12,83             |
| error              |         | 0,025 | 0,012  |                   |
| s [Å]              | 0,0316* | 0,1*  | 0,107  |                   |
| error (inaccurate) |         |       | 0,0085 |                   |
| N                  | 0*      | 1,3   | 6,68   |                   |
| error              |         | 0,45  | 1,7    |                   |
| 2s2                | 0,002*  | 0,02* | 0,023  |                   |
| error              |         |       | 0,0036 |                   |

#### Co\_K\_PtCoC\_H3PO4\_180C\_12

| #                  | Co-O    | Co-Co | Co-Pt  | R-factor filtered |
|--------------------|---------|-------|--------|-------------------|
| R [Å]              | 2,12    | 2,629 | 2,685  | 12,83             |
| error              | 0,056   | 0,024 | 0,014  |                   |
| s [Å]              | 0,0316* | 0,1*  | 0,107  |                   |
| error (inaccurate) |         |       | 0,0086 |                   |
| N                  | 0,287   | 1,69  | 6,62   |                   |
| error              | 0,24    | 0,47  | 1,7    |                   |
| 2s2                | 0,002*  | 0,02* | 0,0231 |                   |
| error              |         |       | 0,0037 |                   |

#### Co\_K\_PtCoC\_H3PO4\_180C\_13

| #                  | Co-O    | Co-Co | Co-Pt  | R-factor filtered |
|--------------------|---------|-------|--------|-------------------|
| R [Å]              | 2*      | 2,636 | 2,669  | 12,83             |
| error              |         | 0,025 | 0,012  |                   |
| s [Å]              | 0,0316* | 0,1*  | 0,101  |                   |
| error (inaccurate) |         |       | 0,0083 |                   |
| N                  | 0*      | 1,61  | 5,63   |                   |
| error              |         | 0,47  | 1,5    |                   |
| 2s2                | 0,002*  | 0,02* | 0,0206 |                   |
| error              |         |       | 0,0034 |                   |

S02 = 0,8129787

| Sample                          | Time (min) |
|---------------------------------|------------|
| PtCorGO_dry_140C_Pt_L3          | 0          |
| PtCorGO_H3PO4_140C_1_Pt_L3_0000 | 3          |
| PtCorGO_H3PO4_140C_1_Pt_L3_0001 | 6          |
| PtCorGO_H3PO4_140C_2_Pt_L3_0000 | 9          |
| PtCorGO_H3PO4_140C_2_Pt_L3_0001 | 12         |
| PtCorGO_H3PO4_140C_2_Pt_L3_0002 | 15         |
| PtCorGO_H3PO4_140C_2_Pt_L3_0003 | 18         |
| PtCorGO_H3PO4_140C_2_Pt_L3_0004 | 21         |
| PtCorGO_H3PO4_140C_2_Pt_L3_0005 | 24         |
| PtCorGO_H3PO4_140C_2_Pt_L3_0006 | 27         |
| PtCorGO_H3PO4_140C_2_Pt_L3_0007 | 30         |
| PtCorGO_H3PO4_140C_2_Pt_L3_0008 | 33         |
| PtCorGO_H3PO4_140C_2_Pt_L3_0009 | 36         |
| PtCorGO_H3PO4_140C_2_Pt_L3_0010 | 39         |
| PtCorGO_H3PO4_140C_2_Pt_L3_0011 | 42         |
| PtCorGO_H3PO4_140C_2_Pt_L3_0012 | 45         |
| PtCorGO_H3PO4_140C_2_Pt_L3_0013 | 48         |
| PtCorGO_H3PO4_140C_2_Pt_L3_0014 | 51         |
| PtCorGO_H3PO4_140C_2_Pt_L3_0015 | 54         |
| PtCorGO_H3PO4_140C_2_Pt_L3_0016 | 57         |
| PtCorGO_H3PO4_140C_2_Pt_L3_0017 | 60         |
| PtCorGO_H3PO4_140C_2_Pt_L3_0018 | 63         |
| PtCorGO_H3PO4_140C_2_Pt_L3_0019 | 66         |
| PtCorGO_H3PO4_140C_2_Pt_L3_0020 | 69         |
| PtCorGO_H3PO4_140C_2_Pt_L3_0021 | 72         |
| PtCorGO_H3PO4_140C_2_Pt_L3_0022 | 75         |
| PtCorGO_H3PO4_140C_2_Pt_L3_0023 | 78         |
| PtCorGO_H3PO4_140C_2_Pt_L3_0024 | 81         |
| PtCorGO_H3PO4_140C_2_Pt_L3_0025 | 84         |
| PtCorGO_H3PO4_140C_2_Pt_L3_0026 | 87         |
| PtCorGO_H3PO4_140C_2_Pt_L3_0027 | 90         |
| PtCorGO_H3PO4_140C_2_Pt_L3_0028 | 93         |
| PtCorGO_H3PO4_140C_2_Pt_L3_0029 | 96         |
| PtCorGO_H3PO4_140C_2_Pt_L3_0030 | 99         |
| PtCorGO_H3PO4_140C_2_Pt_L3_0031 | 102        |
| PtCorGO_H3PO4_140C_2_Pt_L3_0032 | 105        |
| PtCorGO_H3PO4_140C_2_Pt_L3_0033 | 108        |
| PtCorGO_H3PO4_140C_2_Pt_L3_0034 | 111        |
| PtCorGO_H3PO4_140C_2_Pt_L3_0035 | 114        |
| PtCorGO_H3PO4_140C_2_Pt_L3_0036 | 117        |
| PtCorGO_H3PO4_140C_2_Pt_L3_0037 | 120        |
| PtCorGO_H3PO4_140C_2_Pt_L3_0038 | 123        |
| PtCorGO_H3PO4_140C_2_Pt_L3_0039 | 126        |
| PtCorGO_H3PO4_140C_2_Pt_L3_0040 | 129        |
| PtCorGO_H3PO4_140C_2_Pt_L3_0041 | 132        |
| PtCorGO_H3PO4_140C_2_Pt_L3_0042 | 135        |

|                                 |     |
|---------------------------------|-----|
| PtCorGO_H3PO4_140C_2_Pt_L3_0043 | 138 |
| PtCorGO_H3PO4_140C_2_Pt_L3_0044 | 141 |
| PtCorGO_H3PO4_140C_2_Pt_L3_0045 | 144 |
| PtCorGO_H3PO4_140C_2_Pt_L3_0046 | 147 |
| PtCorGO_H3PO4_140C_2_Pt_L3_0047 | 150 |
| PtCorGO_H3PO4_140C_2_Pt_L3_0048 | 153 |
| PtCorGO_H3PO4_140C_2_Pt_L3_0049 | 156 |
| PtCorGO_H3PO4_140C_2_Pt_L3_0050 | 159 |
| PtCorGO_H3PO4_140C_2_Pt_L3_0051 | 162 |
| PtCorGO_H3PO4_140C_2_Pt_L3_0052 | 165 |
| PtCorGO_H3PO4_140C_2_Pt_L3_0053 | 168 |
| PtCorGO_H3PO4_140C_2_Pt_L3_0054 | 171 |
| PtCorGO_H3PO4_140C_2_Pt_L3_0055 | 174 |
| PtCorGO_H3PO4_140C_2_Pt_L3_0056 | 177 |
| PtCorGO_H3PO4_140C_2_Pt_L3_0057 | 180 |
| PtCorGO_H3PO4_140C_2_Pt_L3_0058 | 183 |
| PtCorGO_H3PO4_140C_2_Pt_L3_0059 | 186 |
| PtCorGO_H3PO4_140C_2_Pt_L3_0060 | 189 |
| PtCorGO_H3PO4_140C_2_Pt_L3_0061 | 192 |
| PtCorGO_H3PO4_140C_2_Pt_L3_0062 | 195 |
| PtCorGO_H3PO4_140C_2_Pt_L3_0063 | 198 |
| PtCorGO_H3PO4_140C_2_Pt_L3_0064 | 201 |
| PtCorGO_H3PO4_140C_2_Pt_L3_0065 | 204 |
| PtCorGO_H3PO4_140C_2_Pt_L3_0066 | 207 |
| PtCorGO_H3PO4_140C_2_Pt_L3_0067 | 210 |
| PtCorGO_H3PO4_140C_2_Pt_L3_0068 | 213 |
| PtCorGO_H3PO4_140C_2_Pt_L3_0069 | 216 |
| PtCorGO_H3PO4_140C_2_Pt_L3_0070 | 219 |
| PtCorGO_H3PO4_140C_2_Pt_L3_0071 | 222 |
| PtCorGO_H3PO4_140C_2_Pt_L3_0072 | 225 |
| PtCorGO_H3PO4_140C_2_Pt_L3_0073 | 228 |
| PtCorGO_H3PO4_140C_2_Pt_L3_0074 | 231 |
| PtCorGO_H3PO4_140C_2_Pt_L3_0075 | 234 |
| PtCorGO_H3PO4_140C_2_Pt_L3_0076 | 237 |
| PtCorGO_H3PO4_140C_2_Pt_L3_0077 | 240 |



PtCorGO\_dry\_140C\_Pt\_L3

S02 = 0,924

| #                  | Pt-O  | Pt-Co   | Pt-Pt | R-factor filtered |       |
|--------------------|-------|---------|-------|-------------------|-------|
| R [Å]              | 1,96  | 2,6*    |       | 2,669             | 30,01 |
| error              | 0,034 |         |       | 0,011             |       |
| s [Å]              | 0,056 | 0,0316* | 0,1*  |                   |       |
| error (inaccurate) | 0,043 |         |       |                   |       |
| N                  | 0,642 | 0*      |       | 8,99              |       |
| error              | 0,55  |         |       | 0,84              |       |
| 2s2                | 0,006 | 0,002*  | 0,02* |                   |       |
| error              | 0,013 |         |       |                   |       |

PtCorGO\_H3PO4\_140C\_1\_Pt\_L3\_0000

| #                  | Pt-O      | Pt-Co   | Pt-Pt | R-factor filtered |       |
|--------------------|-----------|---------|-------|-------------------|-------|
| R [Å]              | 1,894*    | 2,6*    |       | 2,683             | 30,01 |
| error              |           |         |       | 0,011             |       |
| s [Å]              | 0,000521* | 0,0316* | 0,1*  |                   |       |
| error (inaccurate) |           |         |       |                   |       |
| N                  | 0*        | 0*      |       | 8,7               |       |
| error              |           |         |       | 0,8               |       |
| 2s2                | 5,43E-7*  | 0,002*  | 0,02* |                   |       |
| error              |           |         |       |                   |       |

PtCorGO\_H3PO4\_140C\_1\_Pt\_L3\_0001

| #                  | Pt-O      | Pt-Co   | Pt-Pt | R-factor filtered |       |
|--------------------|-----------|---------|-------|-------------------|-------|
| R [Å]              | 1,876*    | 2,6*    |       | 2,665             | 30,01 |
| error              |           |         |       | 0,01              |       |
| s [Å]              | 0,000734* | 0,0316* | 0,1*  |                   |       |
| error (inaccurate) |           |         |       |                   |       |
| N                  | 0*        | 0*      |       | 8,95              |       |
| error              |           |         |       | 0,81              |       |
| 2s2                | 1,08E-6*  | 0,002*  | 0,02* |                   |       |
| error              |           |         |       |                   |       |

PtCorGO\_H3PO4\_140C\_2\_Pt\_L3\_0000

| #                  | Pt-O    | Pt-Co   | Pt-Pt | R-factor filtered |       |
|--------------------|---------|---------|-------|-------------------|-------|
| R [Å]              | 1,967*  | 2,6*    |       | 2,667             | 30,01 |
| error              |         |         |       | 0,0096            |       |
| s [Å]              | 0,0707* | 0,0316* | 0,1*  |                   |       |
| error (inaccurate) |         |         |       |                   |       |
| N                  | 0*      | 0*      |       | 9,87              |       |
| error              |         |         |       | 0,81              |       |
| 2s2                | 0,01*   | 0,002*  | 0,02* |                   |       |
| error              |         |         |       |                   |       |

PtCorGO\_H3PO4\_140C\_2\_Pt\_L3\_0001

| #     | Pt-O   | Pt-Co | Pt-Pt | R-factor filtered |       |
|-------|--------|-------|-------|-------------------|-------|
| R [Å] | 1,967* | 2,6*  |       | 2,68              | 30,01 |
| error |        |       |       | 0,0082            |       |

|                                 |         |         |       |                   |       |
|---------------------------------|---------|---------|-------|-------------------|-------|
| s [Å]                           | 0,209*  | 0,0316* | 0,1*  |                   |       |
| error (inaccurate)              |         |         |       |                   |       |
| N                               | 0*      | 0*      |       | 10,8              |       |
| error                           |         |         |       | 0,8               |       |
| 2s2                             | 0,0872* | 0,002*  | 0,02* |                   |       |
| error                           |         |         |       |                   |       |
| PtCorGO_H3PO4_140C_2_Pt_L3_0002 |         |         |       |                   |       |
| #                               | Pt-O    | Pt-Co   | Pt-Pt | R-factor filtered |       |
| R [Å]                           | 1,967*  | 2,6*    |       | 2,679             | 30,01 |
| error                           |         |         |       | 0,0097            |       |
| s [Å]                           | 0,0778* | 0,0316* | 0,1*  |                   |       |
| error (inaccurate)              |         |         |       |                   |       |
| N                               | 0*      | 0*      |       | 9,82              |       |
| error                           |         |         |       | 0,82              |       |
| 2s2                             | 0,0121* | 0,002*  | 0,02* |                   |       |
| error                           |         |         |       |                   |       |
| PtCorGO_H3PO4_140C_2_Pt_L3_0003 |         |         |       |                   |       |
| #                               | Pt-O    | Pt-Co   | Pt-Pt | R-factor filtered |       |
| R [Å]                           | 1,967*  | 2,6*    |       | 2,691             | 30,01 |
| error                           |         |         |       | 0,0093            |       |
| s [Å]                           | 0,0707* | 0,0316* | 0,1*  |                   |       |
| error (inaccurate)              |         |         |       |                   |       |
| N                               | 0*      | 0*      |       | 10                |       |
| error                           |         |         |       | 0,81              |       |
| 2s2                             | 0,01*   | 0,002*  | 0,02* |                   |       |
| error                           |         |         |       |                   |       |
| PtCorGO_H3PO4_140C_2_Pt_L3_0004 |         |         |       |                   |       |
| #                               | Pt-O    | Pt-Co   | Pt-Pt | R-factor filtered |       |
| R [Å]                           | 1,967*  | 2,6*    |       | 2,686             | 30,01 |
| error                           |         |         |       | 0,0092            |       |
| s [Å]                           | 0,0707* | 0,0316* | 0,1*  |                   |       |
| error (inaccurate)              |         |         |       |                   |       |
| N                               | 0*      | 0*      |       | 10,3              |       |
| error                           |         |         |       | 0,82              |       |
| 2s2                             | 0,01*   | 0,002*  | 0,02* |                   |       |
| error                           |         |         |       |                   |       |
| PtCorGO_H3PO4_140C_2_Pt_L3_0005 |         |         |       |                   |       |
| #                               | Pt-O    | Pt-Co   | Pt-Pt | R-factor filtered |       |
| R [Å]                           | 1,967*  | 2,6*    |       | 2,681             | 30,01 |
| error                           |         |         |       | 0,0095            |       |
| s [Å]                           | 0,1*    | 0,0316* | 0,1*  |                   |       |
| error (inaccurate)              |         |         |       |                   |       |
| N                               | 0*      | 0*      |       | 9,95              |       |
| error                           |         |         |       | 0,82              |       |

|       |       |        |       |
|-------|-------|--------|-------|
| 2s2   | 0,02* | 0,002* | 0,02* |
| error |       |        |       |

#### PtCorGO\_H3PO4\_140C\_2\_Pt\_L3\_0006

| #                  | Pt-O    | Pt-Co   | Pt-Pt | R-factor filtered |       |
|--------------------|---------|---------|-------|-------------------|-------|
| R [Å]              | 1,967*  | 2,6*    |       | 2,688             | 30,01 |
| error              |         |         |       | 0,0089            |       |
| s [Å]              | 0,0778* | 0,0316* | 0,1*  |                   |       |
| error (inaccurate) |         |         |       |                   |       |
| N                  | 0*      | 0*      |       | 10,5              |       |
| error              |         |         |       | 0,81              |       |
| 2s2                | 0,0121* | 0,002*  | 0,02* |                   |       |
| error              |         |         |       |                   |       |

#### PtCorGO\_H3PO4\_140C\_2\_Pt\_L3\_0007

| #                  | Pt-O    | Pt-Co   | Pt-Pt | R-factor filtered |       |
|--------------------|---------|---------|-------|-------------------|-------|
| R [Å]              | 1,967*  | 2,6*    |       | 2,686             | 30,01 |
| error              |         |         |       | 0,0097            |       |
| s [Å]              | 0,0707* | 0,0316* | 0,1*  |                   |       |
| error (inaccurate) |         |         |       |                   |       |
| N                  | 0*      | 0*      |       | 9,64              |       |
| error              |         |         |       | 0,81              |       |
| 2s2                | 0,01*   | 0,002*  | 0,02* |                   |       |
| error              |         |         |       |                   |       |

#### PtCorGO\_H3PO4\_140C\_2\_Pt\_L3\_0008

| #                  | Pt-O    | Pt-Co   | Pt-Pt | R-factor filtered |       |
|--------------------|---------|---------|-------|-------------------|-------|
| R [Å]              | 1,967*  | 2,6*    |       | 2,684             | 30,01 |
| error              |         |         |       | 0,0098            |       |
| s [Å]              | 0,0707* | 0,0316* | 0,1*  |                   |       |
| error (inaccurate) |         |         |       |                   |       |
| N                  | 0*      | 0*      |       | 9,63              |       |
| error              |         |         |       | 0,81              |       |
| 2s2                | 0,01*   | 0,002*  | 0,02* |                   |       |
| error              |         |         |       |                   |       |

#### PtCorGO\_H3PO4\_140C\_2\_Pt\_L3\_0009

| #                  | Pt-O      | Pt-Co   | Pt-Pt | R-factor filtered |       |
|--------------------|-----------|---------|-------|-------------------|-------|
| R [Å]              | 1,894*    | 2,65*   |       | 2,677             | 27,68 |
| error              |           |         |       | 0,0091            |       |
| s [Å]              | 0,000521* | 0,0316* | 0,1*  |                   |       |
| error (inaccurate) |           |         |       |                   |       |
| N                  | 0*        | 0*      |       | 10,5              |       |
| error              |           |         |       | 0,82              |       |
| 2s2                | 5,43E-7*  | 0,002*  | 0,02* |                   |       |
| error              |           |         |       |                   |       |

#### PtCorGO\_H3PO4\_140C\_2\_Pt\_L3\_0010

|                    |           |         |       |                   |       |
|--------------------|-----------|---------|-------|-------------------|-------|
| #                  | Pt-O      | Pt-Co   | Pt-Pt | R-factor filtered |       |
| R [Å]              | 1,876*    | 2,65*   |       | 2,692             | 27,68 |
| error              |           |         |       | 0,0088            |       |
| s [Å]              | 0,000734* | 0,0316* | 0,1*  |                   |       |
| error (inaccurate) |           |         |       |                   |       |
| N                  | 0*        | 0*      |       | 10,6              |       |
| error              |           |         |       | 0,82              |       |
| 2s2                | 1,08E-6*  | 0,002*  | 0,02* |                   |       |
| error              |           |         |       |                   |       |

#### PtCorGO\_H3PO4\_140C\_2\_Pt\_L3\_0011

|                    |         |         |       |                   |       |
|--------------------|---------|---------|-------|-------------------|-------|
| #                  | Pt-O    | Pt-Co   | Pt-Pt | R-factor filtered |       |
| R [Å]              | 1,967*  | 2,65*   |       | 2,68              | 27,68 |
| error              |         |         |       | 0,009             |       |
| s [Å]              | 0,0707* | 0,0316* | 0,1*  |                   |       |
| error (inaccurate) |         |         |       |                   |       |
| N                  | 0*      | 0*      |       | 10,3              |       |
| error              |         |         |       | 0,81              |       |
| 2s2                | 0,01*   | 0,002*  | 0,02* |                   |       |
| error              |         |         |       |                   |       |

#### PtCorGO\_H3PO4\_140C\_2\_Pt\_L3\_0012

|                    |         |         |       |                   |       |
|--------------------|---------|---------|-------|-------------------|-------|
| #                  | Pt-O    | Pt-Co   | Pt-Pt | R-factor filtered |       |
| R [Å]              | 1,967*  | 2,65*   |       | 2,69              | 27,68 |
| error              |         |         |       | 0,0088            |       |
| s [Å]              | 0,209*  | 0,0316* | 0,1*  |                   |       |
| error (inaccurate) |         |         |       |                   |       |
| N                  | 0*      | 0*      |       | 10                |       |
| error              |         |         |       | 0,8               |       |
| 2s2                | 0,0872* | 0,002*  | 0,02* |                   |       |
| error              |         |         |       |                   |       |

#### PtCorGO\_H3PO4\_140C\_2\_Pt\_L3\_0013

|                    |         |         |       |                   |       |
|--------------------|---------|---------|-------|-------------------|-------|
| #                  | Pt-O    | Pt-Co   | Pt-Pt | R-factor filtered |       |
| R [Å]              | 1,967*  | 2,65*   |       | 2,688             | 27,68 |
| error              |         |         |       | 0,009             |       |
| s [Å]              | 0,0778* | 0,0316* | 0,1*  |                   |       |
| error (inaccurate) |         |         |       |                   |       |
| N                  | 0*      | 0*      |       | 10,4              |       |
| error              |         |         |       | 0,81              |       |
| 2s2                | 0,0121* | 0,002*  | 0,02* |                   |       |
| error              |         |         |       |                   |       |

#### PtCorGO\_H3PO4\_140C\_2\_Pt\_L3\_0014

|       |         |         |       |                   |       |
|-------|---------|---------|-------|-------------------|-------|
| #     | Pt-O    | Pt-Co   | Pt-Pt | R-factor filtered |       |
| R [Å] | 1,967*  | 2,65*   |       | 2,679             | 27,68 |
| error |         |         |       | 0,0089            |       |
| s [Å] | 0,0707* | 0,0316* | 0,1*  |                   |       |

|                                 |         |         |       |                   |       |
|---------------------------------|---------|---------|-------|-------------------|-------|
| error (inaccurate)              |         |         |       |                   |       |
| N                               | 0*      | 0*      |       | 10,5              |       |
| error                           |         |         |       | 0,81              |       |
| 2s2                             | 0,01*   | 0,002*  | 0,02* |                   |       |
| error                           |         |         |       |                   |       |
| PtCorGO_H3PO4_140C_2_Pt_L3_0015 |         |         |       |                   |       |
| #                               | Pt-O    | Pt-Co   | Pt-Pt | R-factor filtered |       |
| R [Å]                           | 1,967*  | 2,65*   |       | 2,686             | 27,68 |
| error                           |         |         |       | 0,0092            |       |
| s [Å]                           | 0,0707* | 0,0316* | 0,1*  |                   |       |
| error (inaccurate)              |         |         |       |                   |       |
| N                               | 0*      | 0*      |       | 10,2              |       |
| error                           |         |         |       | 0,81              |       |
| 2s2                             | 0,01*   | 0,002*  | 0,02* |                   |       |
| error                           |         |         |       |                   |       |
| PtCorGO_H3PO4_140C_2_Pt_L3_0016 |         |         |       |                   |       |
| #                               | Pt-O    | Pt-Co   | Pt-Pt | R-factor filtered |       |
| R [Å]                           | 1,967*  | 2,65*   |       | 2,689             | 27,68 |
| error                           |         |         |       | 0,0087            |       |
| s [Å]                           | 0,1*    | 0,0316* | 0,1*  |                   |       |
| error (inaccurate)              |         |         |       |                   |       |
| N                               | 0*      | 0*      |       | 10,8              |       |
| error                           |         |         |       | 0,81              |       |
| 2s2                             | 0,02*   | 0,002*  | 0,02* |                   |       |
| error                           |         |         |       |                   |       |
| PtCorGO_H3PO4_140C_2_Pt_L3_0017 |         |         |       |                   |       |
| #                               | Pt-O    | Pt-Co   | Pt-Pt | R-factor filtered |       |
| R [Å]                           | 1,967*  | 2,65*   |       | 2,691             | 27,68 |
| error                           |         |         |       | 0,0091            |       |
| s [Å]                           | 0,0778* | 0,0316* | 0,1*  |                   |       |
| error (inaccurate)              |         |         |       |                   |       |
| N                               | 0*      | 0*      |       | 10,3              |       |
| error                           |         |         |       | 0,82              |       |
| 2s2                             | 0,0121* | 0,002*  | 0,02* |                   |       |
| error                           |         |         |       |                   |       |
| PtCorGO_H3PO4_140C_2_Pt_L3_0018 |         |         |       |                   |       |
| #                               | Pt-O    | Pt-Co   | Pt-Pt | R-factor filtered |       |
| R [Å]                           | 1,967*  | 2,65*   |       | 2,685             | 27,68 |
| error                           |         |         |       | 0,0091            |       |
| s [Å]                           | 0,0707* | 0,0316* | 0,1*  |                   |       |
| error (inaccurate)              |         |         |       |                   |       |
| N                               | 0*      | 0*      |       | 10,3              |       |
| error                           |         |         |       | 0,81              |       |
| 2s2                             | 0,01*   | 0,002*  | 0,02* |                   |       |

error

PtCorGO\_H3PO4\_140C\_2\_Pt\_L3\_0019

| #                  | Pt-O      | Pt-Co   | Pt-Pt | R-factor filtered |       |
|--------------------|-----------|---------|-------|-------------------|-------|
| R [Å]              | 1,894*    | 2,65*   |       | 2,683             | 27,66 |
| error              |           |         |       | 0,0089            |       |
| s [Å]              | 0,000521* | 0,0316* | 0,1*  |                   |       |
| error (inaccurate) |           |         |       |                   |       |
| N                  | 0*        | 0*      |       | 10,6              |       |
| error              |           |         |       | 0,81              |       |
| 2s2                | 5,43E-7*  | 0,002*  | 0,02* |                   |       |
| error              |           |         |       |                   |       |

PtCorGO\_H3PO4\_140C\_2\_Pt\_L3\_0020

| #                  | Pt-O      | Pt-Co   | Pt-Pt | R-factor filtered |       |
|--------------------|-----------|---------|-------|-------------------|-------|
| R [Å]              | 1,876*    | 2,65*   |       | 2,694             | 27,66 |
| error              |           |         |       | 0,0089            |       |
| s [Å]              | 0,000734* | 0,0316* | 0,1*  |                   |       |
| error (inaccurate) |           |         |       |                   |       |
| N                  | 0*        | 0*      |       | 10,5              |       |
| error              |           |         |       | 0,81              |       |
| 2s2                | 1,08E-6*  | 0,002*  | 0,02* |                   |       |
| error              |           |         |       |                   |       |

PtCorGO\_H3PO4\_140C\_2\_Pt\_L3\_0021

| #                  | Pt-O    | Pt-Co   | Pt-Pt | R-factor filtered |       |
|--------------------|---------|---------|-------|-------------------|-------|
| R [Å]              | 1,967*  | 2,65*   |       | 2,683             | 27,66 |
| error              |         |         |       | 0,0084            |       |
| s [Å]              | 0,0707* | 0,0316* | 0,1*  |                   |       |
| error (inaccurate) |         |         |       |                   |       |
| N                  | 0*      | 0*      |       | 11,1              |       |
| error              |         |         |       | 0,81              |       |
| 2s2                | 0,01*   | 0,002*  | 0,02* |                   |       |
| error              |         |         |       |                   |       |

PtCorGO\_H3PO4\_140C\_2\_Pt\_L3\_0022

| #                  | Pt-O    | Pt-Co   | Pt-Pt | R-factor filtered |       |
|--------------------|---------|---------|-------|-------------------|-------|
| R [Å]              | 1,967*  | 2,65*   |       | 2,704             | 27,66 |
| error              |         |         |       | 0,0085            |       |
| s [Å]              | 0,209*  | 0,0316* | 0,1*  |                   |       |
| error (inaccurate) |         |         |       |                   |       |
| N                  | 0*      | 0*      |       | 10,4              |       |
| error              |         |         |       | 0,81              |       |
| 2s2                | 0,0872* | 0,002*  | 0,02* |                   |       |
| error              |         |         |       |                   |       |

PtCorGO\_H3PO4\_140C\_2\_Pt\_L3\_0023

| # | Pt-O | Pt-Co | Pt-Pt | R-factor filtered |  |
|---|------|-------|-------|-------------------|--|
|---|------|-------|-------|-------------------|--|

|                    |         |         |       |        |       |
|--------------------|---------|---------|-------|--------|-------|
| R [Å]              | 1,967*  | 2,65*   |       | 2,687  | 27,66 |
| error              |         |         |       | 0,0085 |       |
| s [Å]              | 0,0778* | 0,0316* | 0,1*  |        |       |
| error (inaccurate) |         |         |       |        |       |
| N                  | 0*      | 0*      |       | 10,9   |       |
| error              |         |         |       | 0,81   |       |
| 2s2                | 0,0121* | 0,002*  | 0,02* |        |       |
| error              |         |         |       |        |       |

#### PtCorGO\_H3PO4\_140C\_2\_Pt\_L3\_0024

| #                  | Pt-O    | Pt-Co   | Pt-Pt | R-factor filtered |       |
|--------------------|---------|---------|-------|-------------------|-------|
| R [Å]              | 1,967*  | 2,65*   |       | 2,696             | 27,66 |
| error              |         |         |       | 0,0091            |       |
| s [Å]              | 0,0707* | 0,0316* | 0,1*  |                   |       |
| error (inaccurate) |         |         |       |                   |       |
| N                  | 0*      | 0*      |       | 10,2              |       |
| error              |         |         |       | 0,81              |       |
| 2s2                | 0,01*   | 0,002*  | 0,02* |                   |       |
| error              |         |         |       |                   |       |

#### PtCorGO\_H3PO4\_140C\_2\_Pt\_L3\_0025

| #                  | Pt-O    | Pt-Co   | Pt-Pt | R-factor filtered |       |
|--------------------|---------|---------|-------|-------------------|-------|
| R [Å]              | 1,967*  | 2,65*   |       | 2,679             | 27,66 |
| error              |         |         |       | 0,0091            |       |
| s [Å]              | 0,0707* | 0,0316* | 0,1*  |                   |       |
| error (inaccurate) |         |         |       |                   |       |
| N                  | 0*      | 0*      |       | 10,3              |       |
| error              |         |         |       | 0,81              |       |
| 2s2                | 0,01*   | 0,002*  | 0,02* |                   |       |
| error              |         |         |       |                   |       |

#### PtCorGO\_H3PO4\_140C\_2\_Pt\_L3\_0026

| #                  | Pt-O   | Pt-Co   | Pt-Pt | R-factor filtered |       |
|--------------------|--------|---------|-------|-------------------|-------|
| R [Å]              | 1,967* | 2,65*   |       | 2,685             | 27,66 |
| error              |        |         |       | 0,0091            |       |
| s [Å]              | 0,1*   | 0,0316* | 0,1*  |                   |       |
| error (inaccurate) |        |         |       |                   |       |
| N                  | 0*     | 0*      |       | 10,3              |       |
| error              |        |         |       | 0,81              |       |
| 2s2                | 0,02*  | 0,002*  | 0,02* |                   |       |
| error              |        |         |       |                   |       |

#### PtCorGO\_H3PO4\_140C\_2\_Pt\_L3\_0027

| #                  | Pt-O    | Pt-Co   | Pt-Pt | R-factor filtered |       |
|--------------------|---------|---------|-------|-------------------|-------|
| R [Å]              | 1,967*  | 2,65*   |       | 2,69              | 27,66 |
| error              |         |         |       | 0,0087            |       |
| s [Å]              | 0,0778* | 0,0316* | 0,1*  |                   |       |
| error (inaccurate) |         |         |       |                   |       |

|       |         |        |       |      |
|-------|---------|--------|-------|------|
| N     | 0*      | 0*     |       | 10,6 |
| error |         |        |       | 0,81 |
| 2s2   | 0,0121* | 0,002* | 0,02* |      |
| error |         |        |       |      |

#### PtCorGO\_H3PO4\_140C\_2\_Pt\_L3\_0028

|                    |         |         |       |        |                   |
|--------------------|---------|---------|-------|--------|-------------------|
| #                  | Pt-O    | Pt-Co   | Pt-Pt |        | R-factor filtered |
| R [Å]              | 1,967*  | 2,65*   |       | 2,688  | 27,66             |
| error              |         |         |       | 0,0092 |                   |
| s [Å]              | 0,0707* | 0,0316* | 0,1*  |        |                   |
| error (inaccurate) |         |         |       |        |                   |
| N                  | 0*      | 0*      |       | 10,2   |                   |
| error              |         |         |       | 0,81   |                   |
| 2s2                | 0,01*   | 0,002*  | 0,02* |        |                   |
| error              |         |         |       |        |                   |

#### PtCorGO\_H3PO4\_140C\_2\_Pt\_L3\_0029

|                    |           |         |       |        |                   |
|--------------------|-----------|---------|-------|--------|-------------------|
| #                  | Pt-O      | Pt-Co   | Pt-Pt |        | R-factor filtered |
| R [Å]              | 1,894*    | 2,65*   |       | 2,697  | 27,19             |
| error              |           |         |       | 0,0093 |                   |
| s [Å]              | 0,000521* | 0,0316* | 0,1*  |        |                   |
| error (inaccurate) |           |         |       |        |                   |
| N                  | 0*        | 0*      |       | 10     |                   |
| error              |           |         |       | 0,81   |                   |
| 2s2                | 5,43E-7*  | 0,002*  | 0,02* |        |                   |
| error              |           |         |       |        |                   |

#### PtCorGO\_H3PO4\_140C\_2\_Pt\_L3\_0030

|                    |           |         |       |        |                   |
|--------------------|-----------|---------|-------|--------|-------------------|
| #                  | Pt-O      | Pt-Co   | Pt-Pt |        | R-factor filtered |
| R [Å]              | 1,876*    | 2,65*   |       | 2,679  | 27,19             |
| error              |           |         |       | 0,0092 |                   |
| s [Å]              | 0,000734* | 0,0316* | 0,1*  |        |                   |
| error (inaccurate) |           |         |       |        |                   |
| N                  | 0*        | 0*      |       | 10,2   |                   |
| error              |           |         |       | 0,81   |                   |
| 2s2                | 1,08E-6*  | 0,002*  | 0,02* |        |                   |
| error              |           |         |       |        |                   |

#### PtCorGO\_H3PO4\_140C\_2\_Pt\_L3\_0031

|                    |         |         |       |        |                   |
|--------------------|---------|---------|-------|--------|-------------------|
| #                  | Pt-O    | Pt-Co   | Pt-Pt |        | R-factor filtered |
| R [Å]              | 1,967*  | 2,65*   |       | 2,675  | 27,19             |
| error              |         |         |       | 0,0086 |                   |
| s [Å]              | 0,0707* | 0,0316* | 0,1*  |        |                   |
| error (inaccurate) |         |         |       |        |                   |
| N                  | 0*      | 0*      |       | 11     |                   |
| error              |         |         |       | 0,82   |                   |
| 2s2                | 0,01*   | 0,002*  | 0,02* |        |                   |
| error              |         |         |       |        |                   |



## PtCorGO\_H3PO4\_140C\_2\_Pt\_L3\_0032

| #                  | Pt-O    | Pt-Co   | Pt-Pt | R-factor filtered |       |
|--------------------|---------|---------|-------|-------------------|-------|
| R [Å]              | 1,967*  | 2,65*   |       | 2,685             | 27,19 |
| error              |         |         |       | 0,008             |       |
| s [Å]              | 0,209*  | 0,0316* | 0,1*  |                   |       |
| error (inaccurate) |         |         |       |                   |       |
| N                  | 0*      | 0*      |       | 11                |       |
| error              |         |         |       | 0,8               |       |
| 2s2                | 0,0872* | 0,002*  | 0,02* |                   |       |
| error              |         |         |       |                   |       |

## PtCorGO\_H3PO4\_140C\_2\_Pt\_L3\_0033

| #                  | Pt-O    | Pt-Co   | Pt-Pt | R-factor filtered |       |
|--------------------|---------|---------|-------|-------------------|-------|
| R [Å]              | 1,967*  | 2,65*   |       | 2,689             | 27,19 |
| error              |         |         |       | 0,0091            |       |
| s [Å]              | 0,0778* | 0,0316* | 0,1*  |                   |       |
| error (inaccurate) |         |         |       |                   |       |
| N                  | 0*      | 0*      |       | 10,3              |       |
| error              |         |         |       | 0,81              |       |
| 2s2                | 0,0121* | 0,002*  | 0,02* |                   |       |
| error              |         |         |       |                   |       |

## PtCorGO\_H3PO4\_140C\_2\_Pt\_L3\_0034

| #                  | Pt-O    | Pt-Co   | Pt-Pt | R-factor filtered |       |
|--------------------|---------|---------|-------|-------------------|-------|
| R [Å]              | 1,967*  | 2,65*   |       | 2,694             | 27,19 |
| error              |         |         |       | 0,0088            |       |
| s [Å]              | 0,0707* | 0,0316* | 0,1*  |                   |       |
| error (inaccurate) |         |         |       |                   |       |
| N                  | 0*      | 0*      |       | 10,5              |       |
| error              |         |         |       | 0,81              |       |
| 2s2                | 0,01*   | 0,002*  | 0,02* |                   |       |
| error              |         |         |       |                   |       |

## PtCorGO\_H3PO4\_140C\_2\_Pt\_L3\_0035

| #                  | Pt-O    | Pt-Co   | Pt-Pt | R-factor filtered |       |
|--------------------|---------|---------|-------|-------------------|-------|
| R [Å]              | 1,967*  | 2,65*   |       | 2,684             | 27,19 |
| error              |         |         |       | 0,0087            |       |
| s [Å]              | 0,0707* | 0,0316* | 0,1*  |                   |       |
| error (inaccurate) |         |         |       |                   |       |
| N                  | 0*      | 0*      |       | 10,7              |       |
| error              |         |         |       | 0,81              |       |
| 2s2                | 0,01*   | 0,002*  | 0,02* |                   |       |
| error              |         |         |       |                   |       |

## PtCorGO\_H3PO4\_140C\_2\_Pt\_L3\_0036

| #     | Pt-O   | Pt-Co | Pt-Pt | R-factor filtered |       |
|-------|--------|-------|-------|-------------------|-------|
| R [Å] | 1,967* | 2,65* |       | 2,692             | 27,19 |

|                    |       |         |       |        |
|--------------------|-------|---------|-------|--------|
| error              |       |         |       | 0,0088 |
| s [Å]              | 0,1*  | 0,0316* | 0,1*  |        |
| error (inaccurate) |       |         |       |        |
| N                  | 0*    | 0*      |       | 10,5   |
| error              |       |         |       | 0,81   |
| 2s2                | 0,02* | 0,002*  | 0,02* |        |
| error              |       |         |       |        |

#### PtCorGO\_H3PO4\_140C\_2\_Pt\_L3\_0037

|                    |         |         |       |        |                   |
|--------------------|---------|---------|-------|--------|-------------------|
| #                  | Pt-O    | Pt-Co   | Pt-Pt |        | R-factor filtered |
| R [Å]              | 1,967*  | 2,65*   |       | 2,699  | 27,19             |
| error              |         |         |       | 0,0093 |                   |
| s [Å]              | 0,0778* | 0,0316* | 0,1*  |        |                   |
| error (inaccurate) |         |         |       |        |                   |
| N                  | 0*      | 0*      |       | 9,92   |                   |
| error              |         |         |       | 0,82   |                   |
| 2s2                | 0,0121* | 0,002*  | 0,02* |        |                   |
| error              |         |         |       |        |                   |

#### PtCorGO\_H3PO4\_140C\_2\_Pt\_L3\_0038

|                    |         |         |       |        |                   |
|--------------------|---------|---------|-------|--------|-------------------|
| #                  | Pt-O    | Pt-Co   | Pt-Pt |        | R-factor filtered |
| R [Å]              | 1,967*  | 2,65*   |       | 2,683  | 27,19             |
| error              |         |         |       | 0,0092 |                   |
| s [Å]              | 0,0707* | 0,0316* | 0,1*  |        |                   |
| error (inaccurate) |         |         |       |        |                   |
| N                  | 0*      | 0*      |       | 10,1   |                   |
| error              |         |         |       | 0,81   |                   |
| 2s2                | 0,01*   | 0,002*  | 0,02* |        |                   |
| error              |         |         |       |        |                   |

#### PtCorGO\_H3PO4\_140C\_2\_Pt\_L3\_0039

|                    |           |         |       |        |                   |
|--------------------|-----------|---------|-------|--------|-------------------|
| #                  | Pt-O      | Pt-Co   | Pt-Pt |        | R-factor filtered |
| R [Å]              | 1,894*    | 2,65*   |       | 2,69   | 25,51             |
| error              |           |         |       | 0,0087 |                   |
| s [Å]              | 0,000521* | 0,0316* | 0,1*  |        |                   |
| error (inaccurate) |           |         |       |        |                   |
| N                  | 0*        | 0*      |       | 10,7   |                   |
| error              |           |         |       | 0,81   |                   |
| 2s2                | 5,43E-7*  | 0,002*  | 0,02* |        |                   |
| error              |           |         |       |        |                   |

#### PtCorGO\_H3PO4\_140C\_2\_Pt\_L3\_0040

|                    |           |         |       |        |                   |
|--------------------|-----------|---------|-------|--------|-------------------|
| #                  | Pt-O      | Pt-Co   | Pt-Pt |        | R-factor filtered |
| R [Å]              | 1,876*    | 2,65*   |       | 2,695  | 25,51             |
| error              |           |         |       | 0,0089 |                   |
| s [Å]              | 0,000734* | 0,0316* | 0,1*  |        |                   |
| error (inaccurate) |           |         |       |        |                   |
| N                  | 0*        | 0*      |       | 10,5   |                   |

|                                 |          |         |       |                   |       |
|---------------------------------|----------|---------|-------|-------------------|-------|
| error                           |          |         |       | 0,81              |       |
| 2s2                             | 1,08E-6* | 0,002*  | 0,02* |                   |       |
| error                           |          |         |       |                   |       |
| PtCorGO_H3PO4_140C_2_Pt_L3_0041 |          |         |       |                   |       |
| #                               | Pt-O     | Pt-Co   | Pt-Pt | R-factor filtered |       |
| R [Å]                           | 1,967*   | 2,65*   |       | 2,676             | 25,51 |
| error                           |          |         |       | 0,0088            |       |
| s [Å]                           | 0,0707*  | 0,0316* | 0,1*  |                   |       |
| error (inaccurate)              |          |         |       |                   |       |
| N                               | 0*       | 0*      |       | 10,6              |       |
| error                           |          |         |       | 0,81              |       |
| 2s2                             | 0,01*    | 0,002*  | 0,02* |                   |       |
| error                           |          |         |       |                   |       |
| PtCorGO_H3PO4_140C_2_Pt_L3_0042 |          |         |       |                   |       |
| #                               | Pt-O     | Pt-Co   | Pt-Pt | R-factor filtered |       |
| R [Å]                           | 1,967*   | 2,65*   |       | 2,677             | 25,51 |
| error                           |          |         |       | 0,0082            |       |
| s [Å]                           | 0,209*   | 0,0316* | 0,1*  |                   |       |
| error (inaccurate)              |          |         |       |                   |       |
| N                               | 0*       | 0*      |       | 10,9              |       |
| error                           |          |         |       | 0,8               |       |
| 2s2                             | 0,0872*  | 0,002*  | 0,02* |                   |       |
| error                           |          |         |       |                   |       |
| PtCorGO_H3PO4_140C_2_Pt_L3_0043 |          |         |       |                   |       |
| #                               | Pt-O     | Pt-Co   | Pt-Pt | R-factor filtered |       |
| R [Å]                           | 1,967*   | 2,65*   |       | 2,689             | 25,51 |
| error                           |          |         |       | 0,0091            |       |
| s [Å]                           | 0,0778*  | 0,0316* | 0,1*  |                   |       |
| error (inaccurate)              |          |         |       |                   |       |
| N                               | 0*       | 0*      |       | 10,4              |       |
| error                           |          |         |       | 0,82              |       |
| 2s2                             | 0,0121*  | 0,002*  | 0,02* |                   |       |
| error                           |          |         |       |                   |       |
| PtCorGO_H3PO4_140C_2_Pt_L3_0044 |          |         |       |                   |       |
| #                               | Pt-O     | Pt-Co   | Pt-Pt | R-factor filtered |       |
| R [Å]                           | 1,967*   | 2,65*   |       | 2,687             | 25,51 |
| error                           |          |         |       | 0,0085            |       |
| s [Å]                           | 0,0707*  | 0,0316* | 0,1*  |                   |       |
| error (inaccurate)              |          |         |       |                   |       |
| N                               | 0*       | 0*      |       | 10,9              |       |
| error                           |          |         |       | 0,81              |       |
| 2s2                             | 0,01*    | 0,002*  | 0,02* |                   |       |
| error                           |          |         |       |                   |       |

## PtCorGO\_H3PO4\_140C\_2\_Pt\_L3\_0045

| #                  | Pt-O    | Pt-Co   | Pt-Pt | R-factor filtered |       |
|--------------------|---------|---------|-------|-------------------|-------|
| R [Å]              | 1,967*  | 2,65*   |       | 2,681             | 25,51 |
| error              |         |         |       | 0,0086            |       |
| s [Å]              | 0,0707* | 0,0316* | 0,1*  |                   |       |
| error (inaccurate) |         |         |       |                   |       |
| N                  | 0*      | 0*      |       | 10,9              |       |
| error              |         |         |       | 0,81              |       |
| 2s2                | 0,01*   | 0,002*  | 0,02* |                   |       |
| error              |         |         |       |                   |       |

## PtCorGO\_H3PO4\_140C\_2\_Pt\_L3\_0046

| #                  | Pt-O   | Pt-Co   | Pt-Pt | R-factor filtered |       |
|--------------------|--------|---------|-------|-------------------|-------|
| R [Å]              | 1,967* | 2,65*   |       | 2,689             | 25,51 |
| error              |        |         |       | 0,0086            |       |
| s [Å]              | 0,1*   | 0,0316* | 0,1*  |                   |       |
| error (inaccurate) |        |         |       |                   |       |
| N                  | 0*     | 0*      |       | 10,8              |       |
| error              |        |         |       | 0,81              |       |
| 2s2                | 0,02*  | 0,002*  | 0,02* |                   |       |
| error              |        |         |       |                   |       |

## PtCorGO\_H3PO4\_140C\_2\_Pt\_L3\_0047

| #                  | Pt-O    | Pt-Co   | Pt-Pt | R-factor filtered |       |
|--------------------|---------|---------|-------|-------------------|-------|
| R [Å]              | 1,967*  | 2,65*   |       | 2,704             | 25,51 |
| error              |         |         |       | 0,0097            |       |
| s [Å]              | 0,0778* | 0,0316* | 0,1*  |                   |       |
| error (inaccurate) |         |         |       |                   |       |
| N                  | 0*      | 0*      |       | 9,64              |       |
| error              |         |         |       | 0,82              |       |
| 2s2                | 0,0121* | 0,002*  | 0,02* |                   |       |
| error              |         |         |       |                   |       |

## PtCorGO\_H3PO4\_140C\_2\_Pt\_L3\_0048

| #                  | Pt-O    | Pt-Co   | Pt-Pt | R-factor filtered |       |
|--------------------|---------|---------|-------|-------------------|-------|
| R [Å]              | 1,967*  | 2,65*   |       | 2,698             | 25,51 |
| error              |         |         |       | 0,0084            |       |
| s [Å]              | 0,0707* | 0,0316* | 0,1*  |                   |       |
| error (inaccurate) |         |         |       |                   |       |
| N                  | 0*      | 0*      |       | 11,1              |       |
| error              |         |         |       | 0,81              |       |
| 2s2                | 0,01*   | 0,002*  | 0,02* |                   |       |
| error              |         |         |       |                   |       |

## PtCorGO\_H3PO4\_140C\_2\_Pt\_L3\_0049

| #     | Pt-O   | Pt-Co | Pt-Pt | R-factor filtered |       |
|-------|--------|-------|-------|-------------------|-------|
| R [Å] | 1,894* | 2,65* |       | 2,693             | 27,38 |
| error |        |       |       | 0,0095            |       |

|                                 |           |         |       |                   |       |
|---------------------------------|-----------|---------|-------|-------------------|-------|
| s [Å]                           | 0,000521* | 0,0316* | 0,1*  |                   |       |
| error (inaccurate)              |           |         |       |                   |       |
| N                               | 0*        | 0*      |       | 9,78              |       |
| error                           |           |         |       | 0,81              |       |
| 2s2                             | 5,43E-7*  | 0,002*  | 0,02* |                   |       |
| error                           |           |         |       |                   |       |
| PtCorGO_H3PO4_140C_2_Pt_L3_0050 |           |         |       |                   |       |
| #                               | Pt-O      | Pt-Co   | Pt-Pt | R-factor filtered |       |
| R [Å]                           | 1,876*    | 2,65*   |       | 2,704             | 27,38 |
| error                           |           |         |       | 0,0085            |       |
| s [Å]                           | 0,000734* | 0,0316* | 0,1*  |                   |       |
| error (inaccurate)              |           |         |       |                   |       |
| N                               | 0*        | 0*      |       | 10,8              |       |
| error                           |           |         |       | 0,81              |       |
| 2s2                             | 1,08E-6*  | 0,002*  | 0,02* |                   |       |
| error                           |           |         |       |                   |       |
| PtCorGO_H3PO4_140C_2_Pt_L3_0051 |           |         |       |                   |       |
| #                               | Pt-O      | Pt-Co   | Pt-Pt | R-factor filtered |       |
| R [Å]                           | 1,967*    | 2,65*   |       | 2,676             | 27,38 |
| error                           |           |         |       | 0,0089            |       |
| s [Å]                           | 0,0707*   | 0,0316* | 0,1*  |                   |       |
| error (inaccurate)              |           |         |       |                   |       |
| N                               | 0*        | 0*      |       | 10,5              |       |
| error                           |           |         |       | 0,81              |       |
| 2s2                             | 0,01*     | 0,002*  | 0,02* |                   |       |
| error                           |           |         |       |                   |       |
| PtCorGO_H3PO4_140C_2_Pt_L3_0052 |           |         |       |                   |       |
| #                               | Pt-O      | Pt-Co   | Pt-Pt | R-factor filtered |       |
| R [Å]                           | 1,967*    | 2,65*   |       | 2,685             | 27,38 |
| error                           |           |         |       | 0,0075            |       |
| s [Å]                           | 0,209*    | 0,0316* | 0,1*  |                   |       |
| error (inaccurate)              |           |         |       |                   |       |
| N                               | 0*        | 0*      |       | 11,7              |       |
| error                           |           |         |       | 0,8               |       |
| 2s2                             | 0,0872*   | 0,002*  | 0,02* |                   |       |
| error                           |           |         |       |                   |       |
| PtCorGO_H3PO4_140C_2_Pt_L3_0053 |           |         |       |                   |       |
| #                               | Pt-O      | Pt-Co   | Pt-Pt | R-factor filtered |       |
| R [Å]                           | 1,967*    | 2,65*   |       | 2,696             | 27,38 |
| error                           |           |         |       | 0,0091            |       |
| s [Å]                           | 0,0778*   | 0,0316* | 0,1*  |                   |       |
| error (inaccurate)              |           |         |       |                   |       |
| N                               | 0*        | 0*      |       | 10,1              |       |
| error                           |           |         |       | 0,81              |       |

|       |         |        |       |
|-------|---------|--------|-------|
| 2s2   | 0,0121* | 0,002* | 0,02* |
| error |         |        |       |

#### PtCorGO\_H3PO4\_140C\_2\_Pt\_L3\_0054

|                    |         |         |       |                   |       |
|--------------------|---------|---------|-------|-------------------|-------|
| #                  | Pt-O    | Pt-Co   | Pt-Pt | R-factor filtered |       |
| R [Å]              | 1,967*  | 2,65*   |       | 2,68              | 27,38 |
| error              |         |         |       | 0,0091            |       |
| s [Å]              | 0,0707* | 0,0316* | 0,1*  |                   |       |
| error (inaccurate) |         |         |       |                   |       |
| N                  | 0*      | 0*      |       | 10,4              |       |
| error              |         |         |       | 0,81              |       |
| 2s2                | 0,01*   | 0,002*  | 0,02* |                   |       |
| error              |         |         |       |                   |       |

#### PtCorGO\_H3PO4\_140C\_2\_Pt\_L3\_0055

|                    |         |         |       |                   |       |
|--------------------|---------|---------|-------|-------------------|-------|
| #                  | Pt-O    | Pt-Co   | Pt-Pt | R-factor filtered |       |
| R [Å]              | 1,967*  | 2,65*   |       | 2,698             | 27,38 |
| error              |         |         |       | 0,0083            |       |
| s [Å]              | 0,0707* | 0,0316* | 0,1*  |                   |       |
| error (inaccurate) |         |         |       |                   |       |
| N                  | 0*      | 0*      |       | 11,2              |       |
| error              |         |         |       | 0,81              |       |
| 2s2                | 0,01*   | 0,002*  | 0,02* |                   |       |
| error              |         |         |       |                   |       |

#### PtCorGO\_H3PO4\_140C\_2\_Pt\_L3\_0056

|                    |        |         |       |                   |       |
|--------------------|--------|---------|-------|-------------------|-------|
| #                  | Pt-O   | Pt-Co   | Pt-Pt | R-factor filtered |       |
| R [Å]              | 1,967* | 2,65*   |       | 2,699             | 27,38 |
| error              |        |         |       | 0,0092            |       |
| s [Å]              | 0,1*   | 0,0316* | 0,1*  |                   |       |
| error (inaccurate) |        |         |       |                   |       |
| N                  | 0*     | 0*      |       | 9,97              |       |
| error              |        |         |       | 0,81              |       |
| 2s2                | 0,02*  | 0,002*  | 0,02* |                   |       |
| error              |        |         |       |                   |       |

#### PtCorGO\_H3PO4\_140C\_2\_Pt\_L3\_0057

|                    |         |         |       |                   |       |
|--------------------|---------|---------|-------|-------------------|-------|
| #                  | Pt-O    | Pt-Co   | Pt-Pt | R-factor filtered |       |
| R [Å]              | 1,967*  | 2,65*   |       | 2,687             | 27,38 |
| error              |         |         |       | 0,0082            |       |
| s [Å]              | 0,0778* | 0,0316* | 0,1*  |                   |       |
| error (inaccurate) |         |         |       |                   |       |
| N                  | 0*      | 0*      |       | 11,5              |       |
| error              |         |         |       | 0,81              |       |
| 2s2                | 0,0121* | 0,002*  | 0,02* |                   |       |
| error              |         |         |       |                   |       |

#### PtCorGO\_H3PO4\_140C\_2\_Pt\_L3\_0058

| #                  | Pt-O    | Pt-Co   | Pt-Pt | R-factor filtered |       |
|--------------------|---------|---------|-------|-------------------|-------|
| R [Å]              | 1,967*  | 2,65*   |       | 2,698             | 27,38 |
| error              |         |         |       | 0,0095            |       |
| s [Å]              | 0,0707* | 0,0316* | 0,1*  |                   |       |
| error (inaccurate) |         |         |       |                   |       |
| N                  | 0*      | 0*      |       | 9,77              |       |
| error              |         |         |       | 0,81              |       |
| 2s2                | 0,01*   | 0,002*  | 0,02* |                   |       |
| error              |         |         |       |                   |       |

#### PtCorGO\_H3PO4\_140C\_2\_Pt\_L3\_0059

| #                  | Pt-O      | Pt-Co   | Pt-Pt | R-factor filtered |       |
|--------------------|-----------|---------|-------|-------------------|-------|
| R [Å]              | 1,894*    | 2,65*   |       | 2,704             | 27,92 |
| error              |           |         |       | 0,0096            |       |
| s [Å]              | 0,000521* | 0,0316* | 0,1*  |                   |       |
| error (inaccurate) |           |         |       |                   |       |
| N                  | 0*        | 0*      |       | 9,72              |       |
| error              |           |         |       | 0,81              |       |
| 2s2                | 5,43E-7*  | 0,002*  | 0,02* |                   |       |
| error              |           |         |       |                   |       |

#### PtCorGO\_H3PO4\_140C\_2\_Pt\_L3\_0060

| #                  | Pt-O      | Pt-Co   | Pt-Pt | R-factor filtered |       |
|--------------------|-----------|---------|-------|-------------------|-------|
| R [Å]              | 1,876*    | 2,65*   |       | 2,691             | 27,92 |
| error              |           |         |       | 0,0088            |       |
| s [Å]              | 0,000734* | 0,0316* | 0,1*  |                   |       |
| error (inaccurate) |           |         |       |                   |       |
| N                  | 0*        | 0*      |       | 10,6              |       |
| error              |           |         |       | 0,81              |       |
| 2s2                | 1,08E-6*  | 0,002*  | 0,02* |                   |       |
| error              |           |         |       |                   |       |

#### PtCorGO\_H3PO4\_140C\_2\_Pt\_L3\_0061

| #                  | Pt-O    | Pt-Co   | Pt-Pt | R-factor filtered |       |
|--------------------|---------|---------|-------|-------------------|-------|
| R [Å]              | 1,967*  | 2,65*   |       | 2,692             | 27,92 |
| error              |         |         |       | 0,0084            |       |
| s [Å]              | 0,0707* | 0,0316* | 0,1*  |                   |       |
| error (inaccurate) |         |         |       |                   |       |
| N                  | 0*      | 0*      |       | 11,2              |       |
| error              |         |         |       | 0,81              |       |
| 2s2                | 0,01*   | 0,002*  | 0,02* |                   |       |
| error              |         |         |       |                   |       |

#### PtCorGO\_H3PO4\_140C\_2\_Pt\_L3\_0062

| #     | Pt-O   | Pt-Co   | Pt-Pt | R-factor filtered |       |
|-------|--------|---------|-------|-------------------|-------|
| R [Å] | 1,967* | 2,65*   |       | 2,69              | 27,92 |
| error |        |         |       | 0,008             |       |
| s [Å] | 0,209* | 0,0316* | 0,1*  |                   |       |

|                                 |         |         |       |                   |       |
|---------------------------------|---------|---------|-------|-------------------|-------|
| error (inaccurate)              |         |         |       |                   |       |
| N                               | 0*      | 0*      |       | 10,8              |       |
| error                           |         |         |       | 0,8               |       |
| 2s2                             | 0,0872* | 0,002*  | 0,02* |                   |       |
| error                           |         |         |       |                   |       |
| PtCorGO_H3PO4_140C_2_Pt_L3_0063 |         |         |       |                   |       |
| #                               | Pt-O    | Pt-Co   | Pt-Pt | R-factor filtered |       |
| R [Å]                           | 1,967*  | 2,65*   |       | 2,683             | 27,92 |
| error                           |         |         |       | 0,0084            |       |
| s [Å]                           | 0,0778* | 0,0316* | 0,1*  |                   |       |
| error (inaccurate)              |         |         |       |                   |       |
| N                               | 0*      | 0*      |       | 11                |       |
| error                           |         |         |       | 0,81              |       |
| 2s2                             | 0,0121* | 0,002*  | 0,02* |                   |       |
| error                           |         |         |       |                   |       |
| PtCorGO_H3PO4_140C_2_Pt_L3_0064 |         |         |       |                   |       |
| #                               | Pt-O    | Pt-Co   | Pt-Pt | R-factor filtered |       |
| R [Å]                           | 1,967*  | 2,65*   |       | 2,678             | 27,92 |
| error                           |         |         |       | 0,0092            |       |
| s [Å]                           | 0,0707* | 0,0316* | 0,1*  |                   |       |
| error (inaccurate)              |         |         |       |                   |       |
| N                               | 0*      | 0*      |       | 10,1              |       |
| error                           |         |         |       | 0,81              |       |
| 2s2                             | 0,01*   | 0,002*  | 0,02* |                   |       |
| error                           |         |         |       |                   |       |
| PtCorGO_H3PO4_140C_2_Pt_L3_0065 |         |         |       |                   |       |
| #                               | Pt-O    | Pt-Co   | Pt-Pt | R-factor filtered |       |
| R [Å]                           | 1,967*  | 2,65*   |       | 2,704             | 27,92 |
| error                           |         |         |       | 0,0079            |       |
| s [Å]                           | 0,0707* | 0,0316* | 0,1*  |                   |       |
| error (inaccurate)              |         |         |       |                   |       |
| N                               | 0*      | 0*      |       | 11,7              |       |
| error                           |         |         |       | 0,81              |       |
| 2s2                             | 0,01*   | 0,002*  | 0,02* |                   |       |
| error                           |         |         |       |                   |       |
| PtCorGO_H3PO4_140C_2_Pt_L3_0066 |         |         |       |                   |       |
| #                               | Pt-O    | Pt-Co   | Pt-Pt | R-factor filtered |       |
| R [Å]                           | 1,967*  | 2,65*   |       | 2,686             | 27,92 |
| error                           |         |         |       | 0,0091            |       |
| s [Å]                           | 0,1*    | 0,0316* | 0,1*  |                   |       |
| error (inaccurate)              |         |         |       |                   |       |
| N                               | 0*      | 0*      |       | 10,3              |       |
| error                           |         |         |       | 0,81              |       |
| 2s2                             | 0,02*   | 0,002*  | 0,02* |                   |       |



error

PtCorGO\_H3PO4\_140C\_2\_Pt\_L3\_0067

| #                  | Pt-O    | Pt-Co   | Pt-Pt | R-factor filtered |       |
|--------------------|---------|---------|-------|-------------------|-------|
| R [Å]              | 1,967*  | 2,65*   |       | 2,667             | 27,92 |
| error              |         |         |       | 0,009             |       |
| s [Å]              | 0,0778* | 0,0316* | 0,1*  |                   |       |
| error (inaccurate) |         |         |       |                   |       |
| N                  | 0*      | 0*      |       | 10,4              |       |
| error              |         |         |       | 0,81              |       |
| 2s2                | 0,0121* | 0,002*  | 0,02* |                   |       |
| error              |         |         |       |                   |       |

PtCorGO\_H3PO4\_140C\_2\_Pt\_L3\_0068

| #                  | Pt-O    | Pt-Co   | Pt-Pt | R-factor filtered |       |
|--------------------|---------|---------|-------|-------------------|-------|
| R [Å]              | 1,967*  | 2,65*   |       | 2,693             | 27,92 |
| error              |         |         |       | 0,0084            |       |
| s [Å]              | 0,0707* | 0,0316* | 0,1*  |                   |       |
| error (inaccurate) |         |         |       |                   |       |
| N                  | 0*      | 0*      |       | 11,2              |       |
| error              |         |         |       | 0,81              |       |
| 2s2                | 0,01*   | 0,002*  | 0,02* |                   |       |
| error              |         |         |       |                   |       |

PtCorGO\_H3PO4\_140C\_2\_Pt\_L3\_0069

| #                  | Pt-O      | Pt-Co   | Pt-Pt | R-factor filtered |       |
|--------------------|-----------|---------|-------|-------------------|-------|
| R [Å]              | 1,894*    | 2,65*   |       | 2,688             | 28,18 |
| error              |           |         |       | 0,009             |       |
| s [Å]              | 0,000521* | 0,0316* | 0,1*  |                   |       |
| error (inaccurate) |           |         |       |                   |       |
| N                  | 0*        | 0*      |       | 10,4              |       |
| error              |           |         |       | 0,81              |       |
| 2s2                | 5,43E-7*  | 0,002*  | 0,02* |                   |       |
| error              |           |         |       |                   |       |

PtCorGO\_H3PO4\_140C\_2\_Pt\_L3\_0070

| #                  | Pt-O      | Pt-Co   | Pt-Pt | R-factor filtered |       |
|--------------------|-----------|---------|-------|-------------------|-------|
| R [Å]              | 1,876*    | 2,65*   |       | 2,702             | 28,18 |
| error              |           |         |       | 0,009             |       |
| s [Å]              | 0,000734* | 0,0316* | 0,1*  |                   |       |
| error (inaccurate) |           |         |       |                   |       |
| N                  | 0*        | 0*      |       | 10,4              |       |
| error              |           |         |       | 0,82              |       |
| 2s2                | 1,08E-6*  | 0,002*  | 0,02* |                   |       |
| error              |           |         |       |                   |       |

PtCorGO\_H3PO4\_140C\_2\_Pt\_L3\_0071

| # | Pt-O | Pt-Co | Pt-Pt | R-factor filtered |  |
|---|------|-------|-------|-------------------|--|
|---|------|-------|-------|-------------------|--|

|                    |         |         |       |        |       |
|--------------------|---------|---------|-------|--------|-------|
| R [Å]              | 1,967*  | 2,65*   |       | 2,695  | 28,18 |
| error              |         |         |       | 0,0083 |       |
| s [Å]              | 0,0707* | 0,0316* | 0,1*  |        |       |
| error (inaccurate) |         |         |       |        |       |
| N                  | 0*      | 0*      |       | 11,2   |       |
| error              |         |         |       | 0,82   |       |
| 2s2                | 0,01*   | 0,002*  | 0,02* |        |       |
| error              |         |         |       |        |       |

#### PtCorGO\_H3PO4\_140C\_2\_Pt\_L3\_0072

|                    |         |         |       |        |                   |
|--------------------|---------|---------|-------|--------|-------------------|
| #                  | Pt-O    | Pt-Co   | Pt-Pt |        | R-factor filtered |
| R [Å]              | 1,967*  | 2,65*   |       | 2,705  | 28,18             |
| error              |         |         |       | 0,0087 |                   |
| s [Å]              | 0,209*  | 0,0316* | 0,1*  |        |                   |
| error (inaccurate) |         |         |       |        |                   |
| N                  | 0*      | 0*      |       | 9,88   |                   |
| error              |         |         |       | 0,8    |                   |
| 2s2                | 0,0872* | 0,002*  | 0,02* |        |                   |
| error              |         |         |       |        |                   |

#### PtCorGO\_H3PO4\_140C\_2\_Pt\_L3\_0073

|                    |         |         |       |        |                   |
|--------------------|---------|---------|-------|--------|-------------------|
| #                  | Pt-O    | Pt-Co   | Pt-Pt |        | R-factor filtered |
| R [Å]              | 1,967*  | 2,65*   |       | 2,683  | 28,18             |
| error              |         |         |       | 0,0086 |                   |
| s [Å]              | 0,0778* | 0,0316* | 0,1*  |        |                   |
| error (inaccurate) |         |         |       |        |                   |
| N                  | 0*      | 0*      |       | 10,8   |                   |
| error              |         |         |       | 0,81   |                   |
| 2s2                | 0,0121* | 0,002*  | 0,02* |        |                   |
| error              |         |         |       |        |                   |

#### PtCorGO\_H3PO4\_140C\_2\_Pt\_L3\_0074

|                    |         |         |       |        |                   |
|--------------------|---------|---------|-------|--------|-------------------|
| #                  | Pt-O    | Pt-Co   | Pt-Pt |        | R-factor filtered |
| R [Å]              | 1,967*  | 2,65*   |       | 2,688  | 28,18             |
| error              |         |         |       | 0,0083 |                   |
| s [Å]              | 0,0707* | 0,0316* | 0,1*  |        |                   |
| error (inaccurate) |         |         |       |        |                   |
| N                  | 0*      | 0*      |       | 11,1   |                   |
| error              |         |         |       | 0,81   |                   |
| 2s2                | 0,01*   | 0,002*  | 0,02* |        |                   |
| error              |         |         |       |        |                   |

#### PtCorGO\_H3PO4\_140C\_2\_Pt\_L3\_0075

|                    |         |         |       |        |                   |
|--------------------|---------|---------|-------|--------|-------------------|
| #                  | Pt-O    | Pt-Co   | Pt-Pt |        | R-factor filtered |
| R [Å]              | 1,967*  | 2,65*   |       | 2,69   | 28,18             |
| error              |         |         |       | 0,0088 |                   |
| s [Å]              | 0,0707* | 0,0316* | 0,1*  |        |                   |
| error (inaccurate) |         |         |       |        |                   |

|       |       |        |       |      |
|-------|-------|--------|-------|------|
| N     | 0*    | 0*     |       | 10,6 |
| error |       |        |       | 0,81 |
| 2s2   | 0,01* | 0,002* | 0,02* |      |
| error |       |        |       |      |

#### PtCorGO\_H3PO4\_140C\_2\_Pt\_L3\_0076

|                    |        |         |       |       |                   |
|--------------------|--------|---------|-------|-------|-------------------|
| #                  | Pt-O   | Pt-Co   | Pt-Pt |       | R-factor filtered |
| R [Å]              | 1,967* | 2,65*   |       | 2,684 | 28,18             |
| error              |        |         |       | 0,009 |                   |
| s [Å]              | 0,1*   | 0,0316* | 0,1*  |       |                   |
| error (inaccurate) |        |         |       |       |                   |
| N                  | 0*     | 0*      |       | 10,3  |                   |
| error              |        |         |       | 0,81  |                   |
| 2s2                | 0,02*  | 0,002*  | 0,02* |       |                   |
| error              |        |         |       |       |                   |

#### PtCorGO\_H3PO4\_140C\_2\_Pt\_L3\_0077

|                    |         |         |       |        |                   |
|--------------------|---------|---------|-------|--------|-------------------|
| #                  | Pt-O    | Pt-Co   | Pt-Pt |        | R-factor filtered |
| R [Å]              | 1,967*  | 2,65*   |       | 2,692  | 28,18             |
| error              |         |         |       | 0,0087 |                   |
| s [Å]              | 0,0778* | 0,0316* | 0,1*  |        |                   |
| error (inaccurate) |         |         |       |        |                   |
| N                  | 0*      | 0*      |       | 10,7   |                   |
| error              |         |         |       | 0,82   |                   |
| 2s2                | 0,0121* | 0,002*  | 0,02* |        |                   |
| error              |         |         |       |        |                   |

| <b>Pt-Co/rGO in situ</b>        | <b>Time (min)</b> |
|---------------------------------|-------------------|
| Sample                          |                   |
| PtCorGO_dry_180C_1_Pt_L3        | 0                 |
| PtCorGO_H3PO4_180C_1_Pt_L3_0000 | 3                 |
| PtCorGO_H3PO4_180C_1_Pt_L3_0001 | 6                 |
| PtCorGO_H3PO4_180C_2_Pt_L3_0000 | 9                 |
| PtCorGO_H3PO4_180C_2_Pt_L3_0001 | 12                |
| PtCorGO_H3PO4_180C_2_Pt_L3_0002 | 15                |
| PtCorGO_H3PO4_180C_2_Pt_L3_0003 | 18                |
| PtCorGO_H3PO4_180C_2_Pt_L3_0004 | 21                |
| PtCorGO_H3PO4_180C_2_Pt_L3_0005 | 24                |
| PtCorGO_H3PO4_180C_2_Pt_L3_0006 | 27                |
| PtCorGO_H3PO4_180C_2_Pt_L3_0007 | 30                |
| PtCorGO_H3PO4_180C_2_Pt_L3_0008 | 33                |
| PtCorGO_H3PO4_180C_2_Pt_L3_0009 | 36                |
| PtCorGO_H3PO4_180C_2_Pt_L3_0010 | 39                |
| PtCorGO_H3PO4_180C_2_Pt_L3_0011 | 42                |
| PtCorGO_H3PO4_180C_2_Pt_L3_0012 | 45                |
| PtCorGO_H3PO4_180C_2_Pt_L3_0013 | 48                |
| PtCorGO_H3PO4_180C_2_Pt_L3_0014 | 51                |
| PtCorGO_H3PO4_180C_2_Pt_L3_0015 | 54                |
| PtCorGO_H3PO4_180C_2_Pt_L3_0016 | 57                |
| PtCorGO_H3PO4_180C_2_Pt_L3_0018 | 63                |
| PtCorGO_H3PO4_180C_2_Pt_L3_0019 | 66                |
| PtCorGO_H3PO4_180C_2_Pt_L3_0020 | 69                |
| PtCorGO_H3PO4_180C_2_Pt_L3_0021 | 72                |
| PtCorGO_H3PO4_180C_2_Pt_L3_0022 | 75                |
| PtCorGO_H3PO4_180C_2_Pt_L3_0023 | 78                |
| PtCorGO_H3PO4_180C_2_Pt_L3_0025 | 84                |
| PtCorGO_H3PO4_180C_2_Pt_L3_0027 | 90                |
| PtCorGO_H3PO4_180C_2_Pt_L3_0030 | 99                |
| PtCorGO_H3PO4_180C_2_Pt_L3_0031 | 102               |
| PtCorGO_H3PO4_180C_2_Pt_L3_0032 | 105               |
| PtCorGO_H3PO4_180C_2_Pt_L3_0033 | 108               |
| PtCorGO_H3PO4_180C_2_Pt_L3_0034 | 111               |
| PtCorGO_H3PO4_180C_2_Pt_L3_0035 | 114               |
| PtCorGO_H3PO4_180C_2_Pt_L3_0036 | 117               |
| PtCorGO_H3PO4_180C_2_Pt_L3_0037 | 120               |
| PtCorGO_H3PO4_180C_2_Pt_L3_0038 | 123               |
| PtCorGO_H3PO4_180C_2_Pt_L3_0039 | 126               |
| PtCorGO_H3PO4_180C_2_Pt_L3_0040 | 129               |
| PtCorGO_H3PO4_180C_2_Pt_L3_0041 | 132               |
| PtCorGO_H3PO4_180C_2_Pt_L3_0042 | 135               |
| PtCorGO_H3PO4_180C_2_Pt_L3_0043 | 138               |
| PtCorGO_H3PO4_180C_2_Pt_L3_0044 | 141               |
| PtCorGO_H3PO4_180C_2_Pt_L3_0045 | 144               |
| PtCorGO_H3PO4_180C_2_Pt_L3_0046 | 147               |
| PtCorGO_H3PO4_180C_2_Pt_L3_0047 | 150               |

|                                 |     |
|---------------------------------|-----|
| PtCorGO_H3PO4_180C_2_Pt_L3_0048 | 153 |
| PtCorGO_H3PO4_180C_2_Pt_L3_0049 | 156 |
| PtCorGO_H3PO4_180C_2_Pt_L3_0050 | 159 |
| PtCorGO_H3PO4_180C_2_Pt_L3_0051 | 162 |
| PtCorGO_H3PO4_180C_2_Pt_L3_0052 | 165 |
| PtCorGO_H3PO4_180C_2_Pt_L3_0053 | 168 |
| PtCorGO_H3PO4_180C_2_Pt_L3_0054 | 171 |
| PtCorGO_H3PO4_180C_2_Pt_L3_0055 | 174 |
| PtCorGO_H3PO4_180C_2_Pt_L3_0056 | 177 |
| PtCorGO_H3PO4_180C_2_Pt_L3_0058 | 183 |
| PtCorGO_H3PO4_180C_2_Pt_L3_0059 | 186 |
| PtCorGO_H3PO4_180C_2_Pt_L3_0060 | 189 |
| PtCorGO_H3PO4_180C_2_Pt_L3_0061 | 192 |
| PtCorGO_H3PO4_180C_2_Pt_L3_0062 | 195 |
| PtCorGO_H3PO4_180C_2_Pt_L3_0065 | 204 |
| PtCorGO_H3PO4_180C_2_Pt_L3_0066 | 207 |
| PtCorGO_H3PO4_180C_2_Pt_L3_0067 | 210 |
| PtCorGO_H3PO4_180C_2_Pt_L3_0068 | 213 |
| PtCorGO_H3PO4_180C_2_Pt_L3_0070 | 219 |
| PtCorGO_H3PO4_180C_2_Pt_L3_0072 | 225 |
| PtCorGO_H3PO4_180C_2_Pt_L3_0073 | 228 |
| PtCorGO_H3PO4_180C_2_Pt_L3_0075 | 234 |
| PtCorGO_H3PO4_180C_2_Pt_L3_0076 | 237 |
| PtCorGO_H3PO4_180C_2_Pt_L3_0077 | 240 |

0  
0  
0  
0  
0  
0  
0  
0  
0  
0  
0  
0

## PtCorGO\_dry\_180C\_1\_Pt\_L3

S02 = 0,924

| #                  | Pt-O   | Pt-Co   | Pt-Pt | R-factor filtered |       |
|--------------------|--------|---------|-------|-------------------|-------|
| R [Å]              | 1,938  | 2,65*   |       | 2,671             | 26,44 |
| error              | 0,039  |         |       | 0,011             |       |
| s [Å]              | 0,0623 | 0,0316* | 0,1*  |                   |       |
| error (inaccurate) | 0,046  |         |       |                   |       |
| N                  | 0,603  | 0*      |       | 9,05              |       |
| error              | 0,56   |         |       | 0,83              |       |
| 2s2                | 0,008  | 0,002*  | 0,02* |                   |       |
| error              | 0,016  |         |       |                   |       |

## PtCorGO\_H3PO4\_180C\_1\_Pt\_L3\_0000

| #                  | Pt-O   | Pt-Co   | Pt-Pt | R-factor filtered |       |
|--------------------|--------|---------|-------|-------------------|-------|
| R [Å]              | 1,894* | 2,65*   |       | 2,688             | 26,44 |
| error              |        |         |       | 0,0094            |       |
| s [Å]              | 0,1*   | 0,0316* | 0,1*  |                   |       |
| error (inaccurate) |        |         |       |                   |       |
| N                  | 0*     | 0*      |       | 10                |       |
| error              |        |         |       | 0,81              |       |
| 2s2                | 0,02*  | 0,002*  | 0,02* |                   |       |
| error              |        |         |       |                   |       |

## PtCorGO\_H3PO4\_180C\_1\_Pt\_L3\_0001

| #                  | Pt-O      | Pt-Co   | Pt-Pt | R-factor filtered |       |
|--------------------|-----------|---------|-------|-------------------|-------|
| R [Å]              | 1,876*    | 2,65*   |       | 2,697             | 26,44 |
| error              |           |         |       | 0,0091            |       |
| s [Å]              | 0,000734* | 0,0316* | 0,1*  |                   |       |
| error (inaccurate) |           |         |       |                   |       |
| N                  | 0*        | 0*      |       | 10,2              |       |
| error              |           |         |       | 0,82              |       |
| 2s2                | 1,08E-6*  | 0,002*  | 0,02* |                   |       |
| error              |           |         |       |                   |       |

## PtCorGO\_H3PO4\_180C\_2\_Pt\_L3\_0000

| #                  | Pt-O    | Pt-Co   | Pt-Pt | R-factor filtered |       |
|--------------------|---------|---------|-------|-------------------|-------|
| R [Å]              | 1,967*  | 2,65*   |       | 2,704             | 26,44 |
| error              |         |         |       | 0,0079            |       |
| s [Å]              | 0,0707* | 0,0316* | 0,1*  |                   |       |
| error (inaccurate) |         |         |       |                   |       |
| N                  | 0*      | 0*      |       | 11,9              |       |
| error              |         |         |       | 0,82              |       |
| 2s2                | 0,01*   | 0,002*  | 0,02* |                   |       |
| error              |         |         |       |                   |       |

## PtCorGO\_H3PO4\_180C\_2\_Pt\_L3\_0001

| #     | Pt-O   | Pt-Co | Pt-Pt | R-factor filtered |       |
|-------|--------|-------|-------|-------------------|-------|
| R [Å] | 1,967* | 2,65* |       | 2,686             | 26,44 |
| error |        |       |       | 0,0082            |       |

|                                 |         |         |       |                   |       |
|---------------------------------|---------|---------|-------|-------------------|-------|
| s [Å]                           | 0,209*  | 0,0316* | 0,1*  |                   |       |
| error (inaccurate)              |         |         |       |                   |       |
| N                               | 0*      | 0*      |       | 10,7              |       |
| error                           |         |         |       | 0,8               |       |
| 2s2                             | 0,0872* | 0,002*  | 0,02* |                   |       |
| error                           |         |         |       |                   |       |
| PtCorGO_H3PO4_180C_2_Pt_L3_0002 |         |         |       |                   |       |
| #                               | Pt-O    | Pt-Co   | Pt-Pt | R-factor filtered |       |
| R [Å]                           | 1,967*  | 2,65*   |       | 2,682             | 26,44 |
| error                           |         |         |       | 0,0086            |       |
| s [Å]                           | 0,0778* | 0,0316* | 0,1*  |                   |       |
| error (inaccurate)              |         |         |       |                   |       |
| N                               | 0*      | 0*      |       | 10,9              |       |
| error                           |         |         |       | 0,81              |       |
| 2s2                             | 0,0121* | 0,002*  | 0,02* |                   |       |
| error                           |         |         |       |                   |       |
| PtCorGO_H3PO4_180C_2_Pt_L3_0003 |         |         |       |                   |       |
| #                               | Pt-O    | Pt-Co   | Pt-Pt | R-factor filtered |       |
| R [Å]                           | 1,967*  | 2,65*   |       | 2,686             | 26,44 |
| error                           |         |         |       | 0,0091            |       |
| s [Å]                           | 0,0707* | 0,0316* | 0,1*  |                   |       |
| error (inaccurate)              |         |         |       |                   |       |
| N                               | 0*      | 0*      |       | 10,3              |       |
| error                           |         |         |       | 0,81              |       |
| 2s2                             | 0,01*   | 0,002*  | 0,02* |                   |       |
| error                           |         |         |       |                   |       |
| PtCorGO_H3PO4_180C_2_Pt_L3_0004 |         |         |       |                   |       |
| #                               | Pt-O    | Pt-Co   | Pt-Pt | R-factor filtered |       |
| R [Å]                           | 1,967*  | 2,65*   |       | 2,692             | 26,44 |
| error                           |         |         |       | 0,0089            |       |
| s [Å]                           | 0,0707* | 0,0316* | 0,1*  |                   |       |
| error (inaccurate)              |         |         |       |                   |       |
| N                               | 0*      | 0*      |       | 10,5              |       |
| error                           |         |         |       | 0,82              |       |
| 2s2                             | 0,01*   | 0,002*  | 0,02* |                   |       |
| error                           |         |         |       |                   |       |
| PtCorGO_H3PO4_180C_2_Pt_L3_0005 |         |         |       |                   |       |
| #                               | Pt-O    | Pt-Co   | Pt-Pt | R-factor filtered |       |
| R [Å]                           | 1,967*  | 2,65*   |       | 2,667             | 26,44 |
| error                           |         |         |       | 0,01              |       |
| s [Å]                           | 0,1*    | 0,0316* | 0,1*  |                   |       |
| error (inaccurate)              |         |         |       |                   |       |
| N                               | 0*      | 0*      |       | 9,25              |       |
| error                           |         |         |       | 0,82              |       |

|       |       |        |       |
|-------|-------|--------|-------|
| 2s2   | 0,02* | 0,002* | 0,02* |
| error |       |        |       |

#### PtCorGO\_H3PO4\_180C\_2\_Pt\_L3\_0006

|                    |         |         |       |                   |       |
|--------------------|---------|---------|-------|-------------------|-------|
| #                  | Pt-O    | Pt-Co   | Pt-Pt | R-factor filtered |       |
| R [Å]              | 1,967*  | 2,65*   |       | 2,688             | 26,44 |
| error              |         |         |       | 0,0089            |       |
| s [Å]              | 0,0778* | 0,0316* | 0,1*  |                   |       |
| error (inaccurate) |         |         |       |                   |       |
| N                  | 0*      | 0*      |       | 10,4              |       |
| error              |         |         |       | 0,81              |       |
| 2s2                | 0,0121* | 0,002*  | 0,02* |                   |       |
| error              |         |         |       |                   |       |

#### PtCorGO\_H3PO4\_180C\_2\_Pt\_L3\_0007

|                    |         |         |       |                   |       |
|--------------------|---------|---------|-------|-------------------|-------|
| #                  | Pt-O    | Pt-Co   | Pt-Pt | R-factor filtered |       |
| R [Å]              | 1,967*  | 2,65*   |       | 2,697             | 26,44 |
| error              |         |         |       | 0,0089            |       |
| s [Å]              | 0,0707* | 0,0316* | 0,1*  |                   |       |
| error (inaccurate) |         |         |       |                   |       |
| N                  | 0*      | 0*      |       | 10,5              |       |
| error              |         |         |       | 0,81              |       |
| 2s2                | 0,01*   | 0,002*  | 0,02* |                   |       |
| error              |         |         |       |                   |       |

#### PtCorGO\_H3PO4\_180C\_2\_Pt\_L3\_0008

|                    |         |         |       |                   |       |
|--------------------|---------|---------|-------|-------------------|-------|
| #                  | Pt-O    | Pt-Co   | Pt-Pt | R-factor filtered |       |
| R [Å]              | 1,967*  | 2,65*   |       | 2,689             | 26,44 |
| error              |         |         |       | 0,0093            |       |
| s [Å]              | 0,0707* | 0,0316* | 0,1*  |                   |       |
| error (inaccurate) |         |         |       |                   |       |
| N                  | 0*      | 0*      |       | 10,1              |       |
| error              |         |         |       | 0,81              |       |
| 2s2                | 0,01*   | 0,002*  | 0,02* |                   |       |
| error              |         |         |       |                   |       |

#### PtCorGO\_H3PO4\_180C\_2\_Pt\_L3\_0009

|                    |        |         |       |                   |       |
|--------------------|--------|---------|-------|-------------------|-------|
| #                  | Pt-O   | Pt-Co   | Pt-Pt | R-factor filtered |       |
| R [Å]              | 1,894* | 2,65*   |       | 2,685             | 25,22 |
| error              |        |         |       | 0,0095            |       |
| s [Å]              | 0,1*   | 0,0316* | 0,1*  |                   |       |
| error (inaccurate) |        |         |       |                   |       |
| N                  | 0*     | 0*      |       | 9,76              |       |
| error              |        |         |       | 0,81              |       |
| 2s2                | 0,02*  | 0,002*  | 0,02* |                   |       |
| error              |        |         |       |                   |       |

#### PtCorGO\_H3PO4\_180C\_2\_Pt\_L3\_0010



| #                  | Pt-O      | Pt-Co   | Pt-Pt | R-factor filtered |       |
|--------------------|-----------|---------|-------|-------------------|-------|
| R [Å]              | 1,876*    | 2,65*   |       | 2,691             | 25,22 |
| error              |           |         |       | 0,0086            |       |
| s [Å]              | 0,000734* | 0,0316* | 0,1*  |                   |       |
| error (inaccurate) |           |         |       |                   |       |
| N                  | 0*        | 0*      |       | 10,8              |       |
| error              |           |         |       | 0,81              |       |
| 2s2                | 1,08E-6*  | 0,002*  | 0,02* |                   |       |
| error              |           |         |       |                   |       |

#### PtCorGO\_H3PO4\_180C\_2\_Pt\_L3\_0011

| #                  | Pt-O    | Pt-Co   | Pt-Pt | R-factor filtered |       |
|--------------------|---------|---------|-------|-------------------|-------|
| R [Å]              | 1,967*  | 2,65*   |       | 2,697             | 25,22 |
| error              |         |         |       | 0,0084            |       |
| s [Å]              | 0,0707* | 0,0316* | 0,1*  |                   |       |
| error (inaccurate) |         |         |       |                   |       |
| N                  | 0*      | 0*      |       | 11                |       |
| error              |         |         |       | 0,81              |       |
| 2s2                | 0,01*   | 0,002*  | 0,02* |                   |       |
| error              |         |         |       |                   |       |

#### PtCorGO\_H3PO4\_180C\_2\_Pt\_L3\_0012

| #                  | Pt-O    | Pt-Co   | Pt-Pt | R-factor filtered |       |
|--------------------|---------|---------|-------|-------------------|-------|
| R [Å]              | 1,967*  | 2,65*   |       | 2,699             | 25,22 |
| error              |         |         |       | 0,009             |       |
| s [Å]              | 0,209*  | 0,0316* | 0,1*  |                   |       |
| error (inaccurate) |         |         |       |                   |       |
| N                  | 0*      | 0*      |       | 9,81              |       |
| error              |         |         |       | 0,81              |       |
| 2s2                | 0,0872* | 0,002*  | 0,02* |                   |       |
| error              |         |         |       |                   |       |

#### PtCorGO\_H3PO4\_180C\_2\_Pt\_L3\_0013

| #                  | Pt-O    | Pt-Co   | Pt-Pt | R-factor filtered |       |
|--------------------|---------|---------|-------|-------------------|-------|
| R [Å]              | 1,967*  | 2,65*   |       | 2,687             | 25,22 |
| error              |         |         |       | 0,0086            |       |
| s [Å]              | 0,0778* | 0,0316* | 0,1*  |                   |       |
| error (inaccurate) |         |         |       |                   |       |
| N                  | 0*      | 0*      |       | 10,9              |       |
| error              |         |         |       | 0,81              |       |
| 2s2                | 0,0121* | 0,002*  | 0,02* |                   |       |
| error              |         |         |       |                   |       |

#### PtCorGO\_H3PO4\_180C\_2\_Pt\_L3\_0014

| #     | Pt-O    | Pt-Co   | Pt-Pt | R-factor filtered |       |
|-------|---------|---------|-------|-------------------|-------|
| R [Å] | 1,967*  | 2,65*   |       | 2,702             | 25,22 |
| error |         |         |       | 0,0089            |       |
| s [Å] | 0,0707* | 0,0316* | 0,1*  |                   |       |

|                                 |         |         |       |                   |       |
|---------------------------------|---------|---------|-------|-------------------|-------|
| error (inaccurate)              |         |         |       |                   |       |
| N                               | 0*      | 0*      |       | 10,5              |       |
| error                           |         |         |       | 0,82              |       |
| 2s2                             | 0,01*   | 0,002*  | 0,02* |                   |       |
| error                           |         |         |       |                   |       |
| PtCorGO_H3PO4_180C_2_Pt_L3_0015 |         |         |       |                   |       |
| #                               | Pt-O    | Pt-Co   | Pt-Pt | R-factor filtered |       |
| R [Å]                           | 1,967*  | 2,65*   |       | 2,694             | 25,22 |
| error                           |         |         |       | 0,0093            |       |
| s [Å]                           | 0,0707* | 0,0316* | 0,1*  |                   |       |
| error (inaccurate)              |         |         |       |                   |       |
| N                               | 0*      | 0*      |       | 10                |       |
| error                           |         |         |       | 0,81              |       |
| 2s2                             | 0,01*   | 0,002*  | 0,02* |                   |       |
| error                           |         |         |       |                   |       |
| PtCorGO_H3PO4_180C_2_Pt_L3_0016 |         |         |       |                   |       |
| #                               | Pt-O    | Pt-Co   | Pt-Pt | R-factor filtered |       |
| R [Å]                           | 1,967*  | 2,65*   |       | 2,688             | 25,22 |
| error                           |         |         |       | 0,0091            |       |
| s [Å]                           | 0,1*    | 0,0316* | 0,1*  |                   |       |
| error (inaccurate)              |         |         |       |                   |       |
| N                               | 0*      | 0*      |       | 10,5              |       |
| error                           |         |         |       | 0,82              |       |
| 2s2                             | 0,02*   | 0,002*  | 0,02* |                   |       |
| error                           |         |         |       |                   |       |
| PtCorGO_H3PO4_180C_2_Pt_L3_0018 |         |         |       |                   |       |
| #                               | Pt-O    | Pt-Co   | Pt-Pt | R-factor filtered |       |
| R [Å]                           | 1,967*  | 2,65*   |       | 2,682             | 25,22 |
| error                           |         |         |       | 0,0084            |       |
| s [Å]                           | 0,0778* | 0,0316* | 0,1*  |                   |       |
| error (inaccurate)              |         |         |       |                   |       |
| N                               | 0*      | 0*      |       | 11,1              |       |
| error                           |         |         |       | 0,81              |       |
| 2s2                             | 0,0121* | 0,002*  | 0,02* |                   |       |
| error                           |         |         |       |                   |       |
| PtCorGO_H3PO4_180C_2_Pt_L3_0019 |         |         |       |                   |       |
| #                               | Pt-O    | Pt-Co   | Pt-Pt | R-factor filtered |       |
| R [Å]                           | 1,894*  | 2,65*   |       | 2,684             | 22,91 |
| error                           |         |         |       | 0,0092            |       |
| s [Å]                           | 0,1*    | 0,0316* | 0,1*  |                   |       |
| error (inaccurate)              |         |         |       |                   |       |
| N                               | 0*      | 0*      |       | 10,2              |       |
| error                           |         |         |       | 0,81              |       |
| 2s2                             | 0,02*   | 0,002*  | 0,02* |                   |       |

error

PtCorGO\_H3PO4\_180C\_2\_Pt\_L3\_0020

| #                  | Pt-O      | Pt-Co   | Pt-Pt | R-factor filtered |       |
|--------------------|-----------|---------|-------|-------------------|-------|
| R [Å]              | 1,876*    | 2,65*   |       | 2,689             | 22,91 |
| error              |           |         |       | 0,0085            |       |
| s [Å]              | 0,000734* | 0,0316* | 0,1*  |                   |       |
| error (inaccurate) |           |         |       |                   |       |
| N                  | 0*        | 0*      |       | 11                |       |
| error              |           |         |       | 0,81              |       |
| 2s2                | 1,08E-6*  | 0,002*  | 0,02* |                   |       |
| error              |           |         |       |                   |       |

PtCorGO\_H3PO4\_180C\_2\_Pt\_L3\_0021

| #                  | Pt-O    | Pt-Co   | Pt-Pt | R-factor filtered |       |
|--------------------|---------|---------|-------|-------------------|-------|
| R [Å]              | 1,967*  | 2,65*   |       | 2,693             | 22,91 |
| error              |         |         |       | 0,0083            |       |
| s [Å]              | 0,0707* | 0,0316* | 0,1*  |                   |       |
| error (inaccurate) |         |         |       |                   |       |
| N                  | 0*      | 0*      |       | 11,4              |       |
| error              |         |         |       | 0,81              |       |
| 2s2                | 0,01*   | 0,002*  | 0,02* |                   |       |
| error              |         |         |       |                   |       |

PtCorGO\_H3PO4\_180C\_2\_Pt\_L3\_0022

| #                  | Pt-O    | Pt-Co   | Pt-Pt | R-factor filtered |       |
|--------------------|---------|---------|-------|-------------------|-------|
| R [Å]              | 1,967*  | 2,65*   |       | 2,686             | 22,91 |
| error              |         |         |       | 0,009             |       |
| s [Å]              | 0,209*  | 0,0316* | 0,1*  |                   |       |
| error (inaccurate) |         |         |       |                   |       |
| N                  | 0*      | 0*      |       | 9,88              |       |
| error              |         |         |       | 0,8               |       |
| 2s2                | 0,0872* | 0,002*  | 0,02* |                   |       |
| error              |         |         |       |                   |       |

PtCorGO\_H3PO4\_180C\_2\_Pt\_L3\_0023

| #                  | Pt-O    | Pt-Co   | Pt-Pt | R-factor filtered |       |
|--------------------|---------|---------|-------|-------------------|-------|
| R [Å]              | 1,967*  | 2,65*   |       | 2,688             | 22,91 |
| error              |         |         |       | 0,0083            |       |
| s [Å]              | 0,0778* | 0,0316* | 0,1*  |                   |       |
| error (inaccurate) |         |         |       |                   |       |
| N                  | 0*      | 0*      |       | 11,2              |       |
| error              |         |         |       | 0,82              |       |
| 2s2                | 0,0121* | 0,002*  | 0,02* |                   |       |
| error              |         |         |       |                   |       |

PtCorGO\_H3PO4\_180C\_2\_Pt\_L3\_0025

| # | Pt-O | Pt-Co | Pt-Pt | R-factor filtered |  |
|---|------|-------|-------|-------------------|--|
|---|------|-------|-------|-------------------|--|

|                    |         |         |       |        |       |
|--------------------|---------|---------|-------|--------|-------|
| R [Å]              | 1,967*  | 2,65*   |       | 2,696  | 22,91 |
| error              |         |         |       | 0,0089 |       |
| s [Å]              | 0,0707* | 0,0316* | 0,1*  |        |       |
| error (inaccurate) |         |         |       |        |       |
| N                  | 0*      | 0*      |       | 10,4   |       |
| error              |         |         |       | 0,81   |       |
| 2s2                | 0,01*   | 0,002*  | 0,02* |        |       |
| error              |         |         |       |        |       |

#### PtCorGO\_H3PO4\_180C\_2\_Pt\_L3\_0027

|                    |         |         |       |        |                   |
|--------------------|---------|---------|-------|--------|-------------------|
| #                  | Pt-O    | Pt-Co   | Pt-Pt |        | R-factor filtered |
| R [Å]              | 1,967*  | 2,65*   |       | 2,702  | 22,91             |
| error              |         |         |       | 0,0086 |                   |
| s [Å]              | 0,0707* | 0,0316* | 0,1*  |        |                   |
| error (inaccurate) |         |         |       |        |                   |
| N                  | 0*      | 0*      |       | 10,9   |                   |
| error              |         |         |       | 0,82   |                   |
| 2s2                | 0,01*   | 0,002*  | 0,02* |        |                   |
| error              |         |         |       |        |                   |

#### PtCorGO\_H3PO4\_180C\_2\_Pt\_L3\_0030

|                    |        |         |       |        |                   |
|--------------------|--------|---------|-------|--------|-------------------|
| #                  | Pt-O   | Pt-Co   | Pt-Pt |        | R-factor filtered |
| R [Å]              | 1,894* | 2,65*   |       | 2,685  | 29,45             |
| error              |        |         |       | 0,0092 |                   |
| s [Å]              | 0,1*   | 0,0316* | 0,1*  |        |                   |
| error (inaccurate) |        |         |       |        |                   |
| N                  | 0*     | 0*      |       | 10,1   |                   |
| error              |        |         |       | 0,81   |                   |
| 2s2                | 0,02*  | 0,002*  | 0,02* |        |                   |
| error              |        |         |       |        |                   |

#### PtCorGO\_H3PO4\_180C\_2\_Pt\_L3\_0031

|                    |           |         |       |        |                   |
|--------------------|-----------|---------|-------|--------|-------------------|
| #                  | Pt-O      | Pt-Co   | Pt-Pt |        | R-factor filtered |
| R [Å]              | 1,876*    | 2,65*   |       | 2,697  | 29,45             |
| error              |           |         |       | 0,0092 |                   |
| s [Å]              | 0,000734* | 0,0316* | 0,1*  |        |                   |
| error (inaccurate) |           |         |       |        |                   |
| N                  | 0*        | 0*      |       | 10,1   |                   |
| error              |           |         |       | 0,82   |                   |
| 2s2                | 1,08E-6*  | 0,002*  | 0,02* |        |                   |
| error              |           |         |       |        |                   |

#### PtCorGO\_H3PO4\_180C\_2\_Pt\_L3\_0032

|                    |         |         |       |        |                   |
|--------------------|---------|---------|-------|--------|-------------------|
| #                  | Pt-O    | Pt-Co   | Pt-Pt |        | R-factor filtered |
| R [Å]              | 1,967*  | 2,65*   |       | 2,684  | 29,45             |
| error              |         |         |       | 0,0089 |                   |
| s [Å]              | 0,0707* | 0,0316* | 0,1*  |        |                   |
| error (inaccurate) |         |         |       |        |                   |

|       |       |        |       |      |
|-------|-------|--------|-------|------|
| N     | 0*    | 0*     |       | 10,5 |
| error |       |        |       | 0,81 |
| 2s2   | 0,01* | 0,002* | 0,02* |      |
| error |       |        |       |      |

#### PtCorGO\_H3PO4\_180C\_2\_Pt\_L3\_0033

|                    |         |         |       |        |                   |
|--------------------|---------|---------|-------|--------|-------------------|
| #                  | Pt-O    | Pt-Co   | Pt-Pt |        | R-factor filtered |
| R [Å]              | 1,967*  | 2,65*   |       | 2,692  | 29,45             |
| error              |         |         |       | 0,0093 |                   |
| s [Å]              | 0,209*  | 0,0316* | 0,1*  |        |                   |
| error (inaccurate) |         |         |       |        |                   |
| N                  | 0*      | 0*      |       | 9,39   |                   |
| error              |         |         |       | 0,8    |                   |
| 2s2                | 0,0872* | 0,002*  | 0,02* |        |                   |
| error              |         |         |       |        |                   |

#### PtCorGO\_H3PO4\_180C\_2\_Pt\_L3\_0034

|                    |         |         |       |        |                   |
|--------------------|---------|---------|-------|--------|-------------------|
| #                  | Pt-O    | Pt-Co   | Pt-Pt |        | R-factor filtered |
| R [Å]              | 1,967*  | 2,65*   |       | 2,69   | 29,45             |
| error              |         |         |       | 0,0087 |                   |
| s [Å]              | 0,0778* | 0,0316* | 0,1*  |        |                   |
| error (inaccurate) |         |         |       |        |                   |
| N                  | 0*      | 0*      |       | 10,7   |                   |
| error              |         |         |       | 0,81   |                   |
| 2s2                | 0,0121* | 0,002*  | 0,02* |        |                   |
| error              |         |         |       |        |                   |

#### PtCorGO\_H3PO4\_180C\_2\_Pt\_L3\_0035

|                    |         |         |       |        |                   |
|--------------------|---------|---------|-------|--------|-------------------|
| #                  | Pt-O    | Pt-Co   | Pt-Pt |        | R-factor filtered |
| R [Å]              | 1,967*  | 2,65*   |       | 2,688  | 29,45             |
| error              |         |         |       | 0,0093 |                   |
| s [Å]              | 0,0707* | 0,0316* | 0,1*  |        |                   |
| error (inaccurate) |         |         |       |        |                   |
| N                  | 0*      | 0*      |       | 10     |                   |
| error              |         |         |       | 0,81   |                   |
| 2s2                | 0,01*   | 0,002*  | 0,02* |        |                   |
| error              |         |         |       |        |                   |

#### PtCorGO\_H3PO4\_180C\_2\_Pt\_L3\_0036

|                    |         |         |       |        |                   |
|--------------------|---------|---------|-------|--------|-------------------|
| #                  | Pt-O    | Pt-Co   | Pt-Pt |        | R-factor filtered |
| R [Å]              | 1,967*  | 2,65*   |       | 2,689  | 29,45             |
| error              |         |         |       | 0,0089 |                   |
| s [Å]              | 0,0707* | 0,0316* | 0,1*  |        |                   |
| error (inaccurate) |         |         |       |        |                   |
| N                  | 0*      | 0*      |       | 10,5   |                   |
| error              |         |         |       | 0,81   |                   |
| 2s2                | 0,01*   | 0,002*  | 0,02* |        |                   |
| error              |         |         |       |        |                   |

## PtCorGO\_H3PO4\_180C\_2\_Pt\_L3\_0037

| #                  | Pt-O    | Pt-Co   | Pt-Pt | R-factor filtered |       |
|--------------------|---------|---------|-------|-------------------|-------|
| R [Å]              | 2*      | 2,65*   |       | 2,689             | 29,45 |
| error              |         |         |       | 0,0047            |       |
| s [Å]              | 0,0316* | 0,0316* | 0,1*  |                   |       |
| error (inaccurate) |         |         |       |                   |       |
| N                  | 0*      | 0*      |       | 10,4              |       |
| error              |         |         |       | 0,82              |       |
| 2s2                | 0,002*  | 0,002*  | 0,02* |                   |       |
| error              |         |         |       |                   |       |

## PtCorGO\_H3PO4\_180C\_2\_Pt\_L3\_0038

| #                  | Pt-O    | Pt-Co   | Pt-Pt | R-factor filtered |       |
|--------------------|---------|---------|-------|-------------------|-------|
| R [Å]              | 2*      | 2,65*   |       | 2,687             | 29,45 |
| error              |         |         |       | 0,0092            |       |
| s [Å]              | 0,0316* | 0,0316* | 0,1*  |                   |       |
| error (inaccurate) |         |         |       |                   |       |
| N                  | 0*      | 0*      |       | 10,1              |       |
| error              |         |         |       | 0,81              |       |
| 2s2                | 0,002*  | 0,002*  | 0,02* |                   |       |
| error              |         |         |       |                   |       |

## PtCorGO\_H3PO4\_180C\_2\_Pt\_L3\_0039

| #                  | Pt-O   | Pt-Co   | Pt-Pt | R-factor filtered |       |
|--------------------|--------|---------|-------|-------------------|-------|
| R [Å]              | 1,894* | 2,65*   |       | 2,69              | 23,08 |
| error              |        |         |       | 0,0084            |       |
| s [Å]              | 0,1*   | 0,0316* | 0,1*  |                   |       |
| error (inaccurate) |        |         |       |                   |       |
| N                  | 0*     | 0*      |       | 11,1              |       |
| error              |        |         |       | 0,81              |       |
| 2s2                | 0,02*  | 0,002*  | 0,02* |                   |       |
| error              |        |         |       |                   |       |

## PtCorGO\_H3PO4\_180C\_2\_Pt\_L3\_0040

| #                  | Pt-O      | Pt-Co   | Pt-Pt | R-factor filtered |       |
|--------------------|-----------|---------|-------|-------------------|-------|
| R [Å]              | 1,876*    | 2,65*   |       | 2,7               | 23,08 |
| error              |           |         |       | 0,0084            |       |
| s [Å]              | 0,000734* | 0,0316* | 0,1*  |                   |       |
| error (inaccurate) |           |         |       |                   |       |
| N                  | 0*        | 0*      |       | 11                |       |
| error              |           |         |       | 0,81              |       |
| 2s2                | 1,08E-6*  | 0,002*  | 0,02* |                   |       |
| error              |           |         |       |                   |       |

## PtCorGO\_H3PO4\_180C\_2\_Pt\_L3\_0041

| #     | Pt-O   | Pt-Co | Pt-Pt | R-factor filtered |       |
|-------|--------|-------|-------|-------------------|-------|
| R [Å] | 1,967* | 2,65* |       | 2,703             | 23,08 |

|                    |         |         |       |        |
|--------------------|---------|---------|-------|--------|
| error              |         |         |       | 0,0088 |
| s [Å]              | 0,0707* | 0,0316* | 0,1*  |        |
| error (inaccurate) |         |         |       |        |
| N                  | 0*      | 0*      |       | 10,6   |
| error              |         |         |       | 0,81   |
| 2s2                | 0,01*   | 0,002*  | 0,02* |        |
| error              |         |         |       |        |

#### PtCorGO\_H3PO4\_180C\_2\_Pt\_L3\_0042

| #                  | Pt-O    | Pt-Co   | Pt-Pt | R-factor filtered |       |
|--------------------|---------|---------|-------|-------------------|-------|
| R [Å]              | 1,967*  | 2,65*   |       | 2,686             | 23,08 |
| error              |         |         |       | 0,0083            |       |
| s [Å]              | 0,209*  | 0,0316* | 0,1*  |                   |       |
| error (inaccurate) |         |         |       |                   |       |
| N                  | 0*      | 0*      |       | 10,6              |       |
| error              |         |         |       | 0,8               |       |
| 2s2                | 0,0872* | 0,002*  | 0,02* |                   |       |
| error              |         |         |       |                   |       |

#### PtCorGO\_H3PO4\_180C\_2\_Pt\_L3\_0043

| #                  | Pt-O    | Pt-Co   | Pt-Pt | R-factor filtered |       |
|--------------------|---------|---------|-------|-------------------|-------|
| R [Å]              | 1,967*  | 2,65*   |       | 2,71              | 23,08 |
| error              |         |         |       | 0,0078            |       |
| s [Å]              | 0,0778* | 0,0316* | 0,1*  |                   |       |
| error (inaccurate) |         |         |       |                   |       |
| N                  | 0*      | 0*      |       | 11,9              |       |
| error              |         |         |       | 0,81              |       |
| 2s2                | 0,0121* | 0,002*  | 0,02* |                   |       |
| error              |         |         |       |                   |       |

#### PtCorGO\_H3PO4\_180C\_2\_Pt\_L3\_0044

| #                  | Pt-O    | Pt-Co   | Pt-Pt | R-factor filtered |       |
|--------------------|---------|---------|-------|-------------------|-------|
| R [Å]              | 1,967*  | 2,65*   |       | 2,691             | 23,08 |
| error              |         |         |       | 0,0084            |       |
| s [Å]              | 0,0707* | 0,0316* | 0,1*  |                   |       |
| error (inaccurate) |         |         |       |                   |       |
| N                  | 0*      | 0*      |       | 11,1              |       |
| error              |         |         |       | 0,81              |       |
| 2s2                | 0,01*   | 0,002*  | 0,02* |                   |       |
| error              |         |         |       |                   |       |

#### PtCorGO\_H3PO4\_180C\_2\_Pt\_L3\_0045

| #                  | Pt-O    | Pt-Co   | Pt-Pt | R-factor filtered |       |
|--------------------|---------|---------|-------|-------------------|-------|
| R [Å]              | 1,967*  | 2,65*   |       | 2,678             | 23,08 |
| error              |         |         |       | 0,0088            |       |
| s [Å]              | 0,0707* | 0,0316* | 0,1*  |                   |       |
| error (inaccurate) |         |         |       |                   |       |
| N                  | 0*      | 0*      |       | 10,5              |       |

|                                 |         |         |       |                   |       |
|---------------------------------|---------|---------|-------|-------------------|-------|
| error                           |         |         |       | 0,81              |       |
| 2s2                             | 0,01*   | 0,002*  | 0,02* |                   |       |
| error                           |         |         |       |                   |       |
| PtCorGO_H3PO4_180C_2_Pt_L3_0046 |         |         |       |                   |       |
| #                               | Pt-O    | Pt-Co   | Pt-Pt | R-factor filtered |       |
| R [Å]                           | 2*      | 2,65*   |       | 2,696             | 23,08 |
| error                           |         |         |       | 0,0081            |       |
| s [Å]                           | 0,0316* | 0,0316* | 0,1*  |                   |       |
| error (inaccurate)              |         |         |       |                   |       |
| N                               | 0*      | 0*      |       | 11,5              |       |
| error                           |         |         |       | 0,81              |       |
| 2s2                             | 0,002*  | 0,002*  | 0,02* |                   |       |
| error                           |         |         |       |                   |       |
| PtCorGO_H3PO4_180C_2_Pt_L3_0047 |         |         |       |                   |       |
| #                               | Pt-O    | Pt-Co   | Pt-Pt | R-factor filtered |       |
| R [Å]                           | 2*      | 2,65*   |       | 2,699             | 23,08 |
| error                           |         |         |       | 0,0091            |       |
| s [Å]                           | 0,0316* | 0,0316* | 0,1*  |                   |       |
| error (inaccurate)              |         |         |       |                   |       |
| N                               | 0*      | 0*      |       | 10,2              |       |
| error                           |         |         |       | 0,81              |       |
| 2s2                             | 0,002*  | 0,002*  | 0,02* |                   |       |
| error                           |         |         |       |                   |       |
| PtCorGO_H3PO4_180C_2_Pt_L3_0048 |         |         |       |                   |       |
| #                               | Pt-O    | Pt-Co   | Pt-Pt | R-factor filtered |       |
| R [Å]                           | 1,894*  | 2,65*   |       | 2,684             | 23,08 |
| error                           |         |         |       | 0,009             |       |
| s [Å]                           | 0,1*    | 0,0316* | 0,1*  |                   |       |
| error (inaccurate)              |         |         |       |                   |       |
| N                               | 0*      | 0*      |       | 10,4              |       |
| error                           |         |         |       | 0,81              |       |
| 2s2                             | 0,02*   | 0,002*  | 0,02* |                   |       |
| error                           |         |         |       |                   |       |
| PtCorGO_H3PO4_180C_2_Pt_L3_0049 |         |         |       |                   |       |
| #                               | Pt-O    | Pt-Co   | Pt-Pt | R-factor filtered |       |
| R [Å]                           | 1,894*  | 2,65*   |       | 2,69              | 24,34 |
| error                           |         |         |       | 0,009             |       |
| s [Å]                           | 0,1*    | 0,0316* | 0,1*  |                   |       |
| error (inaccurate)              |         |         |       |                   |       |
| N                               | 0*      | 0*      |       | 10,4              |       |
| error                           |         |         |       | 0,81              |       |
| 2s2                             | 0,02*   | 0,002*  | 0,02* |                   |       |
| error                           |         |         |       |                   |       |



## PtCorGO\_H3PO4\_180C\_2\_Pt\_L3\_0050

| #                  | Pt-O      | Pt-Co   | Pt-Pt | R-factor filtered |       |
|--------------------|-----------|---------|-------|-------------------|-------|
| R [Å]              | 1,876*    | 2,65*   |       | 2,693             | 24,34 |
| error              |           |         |       | 0,0095            |       |
| s [Å]              | 0,000734* | 0,0316* | 0,1*  |                   |       |
| error (inaccurate) |           |         |       |                   |       |
| N                  | 0*        | 0*      |       | 9,82              |       |
| error              |           |         |       | 0,81              |       |
| 2s2                | 1,08E-6*  | 0,002*  | 0,02* |                   |       |
| error              |           |         |       |                   |       |

## PtCorGO\_H3PO4\_180C\_2\_Pt\_L3\_0051

| #                  | Pt-O    | Pt-Co   | Pt-Pt | R-factor filtered |       |
|--------------------|---------|---------|-------|-------------------|-------|
| R [Å]              | 1,967*  | 2,65*   |       | 2,682             | 24,34 |
| error              |         |         |       | 0,0088            |       |
| s [Å]              | 0,0707* | 0,0316* | 0,1*  |                   |       |
| error (inaccurate) |         |         |       |                   |       |
| N                  | 0*      | 0*      |       | 10,6              |       |
| error              |         |         |       | 0,81              |       |
| 2s2                | 0,01*   | 0,002*  | 0,02* |                   |       |
| error              |         |         |       |                   |       |

## PtCorGO\_H3PO4\_180C\_2\_Pt\_L3\_0052

| #                  | Pt-O    | Pt-Co   | Pt-Pt | R-factor filtered |       |
|--------------------|---------|---------|-------|-------------------|-------|
| R [Å]              | 1,967*  | 2,65*   |       | 2,698             | 24,34 |
| error              |         |         |       | 0,0085            |       |
| s [Å]              | 0,209*  | 0,0316* | 0,1*  |                   |       |
| error (inaccurate) |         |         |       |                   |       |
| N                  | 0*      | 0*      |       | 10,2              |       |
| error              |         |         |       | 0,8               |       |
| 2s2                | 0,0872* | 0,002*  | 0,02* |                   |       |
| error              |         |         |       |                   |       |

## PtCorGO\_H3PO4\_180C\_2\_Pt\_L3\_0053

| #                  | Pt-O    | Pt-Co   | Pt-Pt | R-factor filtered |       |
|--------------------|---------|---------|-------|-------------------|-------|
| R [Å]              | 1,967*  | 2,65*   |       | 2,703             | 24,34 |
| error              |         |         |       | 0,0084            |       |
| s [Å]              | 0,0778* | 0,0316* | 0,1*  |                   |       |
| error (inaccurate) |         |         |       |                   |       |
| N                  | 0*      | 0*      |       | 10,9              |       |
| error              |         |         |       | 0,81              |       |
| 2s2                | 0,0121* | 0,002*  | 0,02* |                   |       |
| error              |         |         |       |                   |       |

## PtCorGO\_H3PO4\_180C\_2\_Pt\_L3\_0054

| #     | Pt-O   | Pt-Co | Pt-Pt | R-factor filtered |       |
|-------|--------|-------|-------|-------------------|-------|
| R [Å] | 1,967* | 2,65* |       | 2,709             | 24,34 |
| error |        |       |       | 0,0086            |       |

|                                 |         |         |       |                   |       |
|---------------------------------|---------|---------|-------|-------------------|-------|
| s [Å]                           | 0,0707* | 0,0316* | 0,1*  |                   |       |
| error (inaccurate)              |         |         |       |                   |       |
| N                               | 0*      | 0*      |       | 10,8              |       |
| error                           |         |         |       | 0,81              |       |
| 2s2                             | 0,01*   | 0,002*  | 0,02* |                   |       |
| error                           |         |         |       |                   |       |
| PtCorGO_H3PO4_180C_2_Pt_L3_0055 |         |         |       |                   |       |
| #                               | Pt-O    | Pt-Co   | Pt-Pt | R-factor filtered |       |
| R [Å]                           | 1,967*  | 2,65*   |       | 2,683             | 24,34 |
| error                           |         |         |       | 0,009             |       |
| s [Å]                           | 0,0707* | 0,0316* | 0,1*  |                   |       |
| error (inaccurate)              |         |         |       |                   |       |
| N                               | 0*      | 0*      |       | 10,4              |       |
| error                           |         |         |       | 0,81              |       |
| 2s2                             | 0,01*   | 0,002*  | 0,02* |                   |       |
| error                           |         |         |       |                   |       |
| PtCorGO_H3PO4_180C_2_Pt_L3_0056 |         |         |       |                   |       |
| #                               | Pt-O    | Pt-Co   | Pt-Pt | R-factor filtered |       |
| R [Å]                           | 2*      | 2,65*   |       | 2,674             | 24,34 |
| error                           |         |         |       | 0,0089            |       |
| s [Å]                           | 0,0316* | 0,0316* | 0,1*  |                   |       |
| error (inaccurate)              |         |         |       |                   |       |
| N                               | 0*      | 0*      |       | 10,5              |       |
| error                           |         |         |       | 0,81              |       |
| 2s2                             | 0,002*  | 0,002*  | 0,02* |                   |       |
| error                           |         |         |       |                   |       |
| PtCorGO_H3PO4_180C_2_Pt_L3_0058 |         |         |       |                   |       |
| #                               | Pt-O    | Pt-Co   | Pt-Pt | R-factor filtered |       |
| R [Å]                           | 2*      | 2,65*   |       | 2,65              | 24,34 |
| error                           |         |         |       | 0,0091            |       |
| s [Å]                           | 0,0316* | 0,0316* | 0,1*  |                   |       |
| error (inaccurate)              |         |         |       |                   |       |
| N                               | 0*      | 0*      |       | 10,3              |       |
| error                           |         |         |       | 0,81              |       |
| 2s2                             | 0,002*  | 0,002*  | 0,02* |                   |       |
| error                           |         |         |       |                   |       |
| PtCorGO_H3PO4_180C_2_Pt_L3_0059 |         |         |       |                   |       |
| #                               | Pt-O    | Pt-Co   | Pt-Pt | R-factor filtered |       |
| R [Å]                           | 1,894*  | 2,65*   |       | 2,687             | 33,43 |
| error                           |         |         |       | 0,0091            |       |
| s [Å]                           | 0,1*    | 0,0316* | 0,1*  |                   |       |
| error (inaccurate)              |         |         |       |                   |       |
| N                               | 0*      | 0*      |       | 10,3              |       |
| error                           |         |         |       | 0,82              |       |

|       |       |        |       |
|-------|-------|--------|-------|
| 2s2   | 0,02* | 0,002* | 0,02* |
| error |       |        |       |

PtCorGO\_H3PO4\_180C\_2\_Pt\_L3\_0060

|                    |           |         |       |                   |       |
|--------------------|-----------|---------|-------|-------------------|-------|
| #                  | Pt-O      | Pt-Co   | Pt-Pt | R-factor filtered |       |
| R [Å]              | 1,876*    | 2,65*   |       | 2,679             | 33,43 |
| error              |           |         |       | 0,0094            |       |
| s [Å]              | 0,000734* | 0,0316* | 0,1*  |                   |       |
| error (inaccurate) |           |         |       |                   |       |
| N                  | 0*        | 0*      |       | 9,88              |       |
| error              |           |         |       | 0,81              |       |
| 2s2                | 1,08E-6*  | 0,002*  | 0,02* |                   |       |
| error              |           |         |       |                   |       |

PtCorGO\_H3PO4\_180C\_2\_Pt\_L3\_0061

|                    |         |         |       |                   |       |
|--------------------|---------|---------|-------|-------------------|-------|
| #                  | Pt-O    | Pt-Co   | Pt-Pt | R-factor filtered |       |
| R [Å]              | 1,967*  | 2,65*   |       | 2,703             | 33,43 |
| error              |         |         |       | 0,0093            |       |
| s [Å]              | 0,0707* | 0,0316* | 0,1*  |                   |       |
| error (inaccurate) |         |         |       |                   |       |
| N                  | 0*      | 0*      |       | 9,9               |       |
| error              |         |         |       | 0,81              |       |
| 2s2                | 0,01*   | 0,002*  | 0,02* |                   |       |
| error              |         |         |       |                   |       |

PtCorGO\_H3PO4\_180C\_2\_Pt\_L3\_0062

|                    |         |         |       |                   |       |
|--------------------|---------|---------|-------|-------------------|-------|
| #                  | Pt-O    | Pt-Co   | Pt-Pt | R-factor filtered |       |
| R [Å]              | 1,967*  | 2,65*   |       | 2,651             | 33,43 |
| error              |         |         |       | 0,011             |       |
| s [Å]              | 0,209*  | 0,0316* | 0,1*  |                   |       |
| error (inaccurate) |         |         |       |                   |       |
| N                  | 0*      | 0*      |       | 8,53              |       |
| error              |         |         |       | 0,79              |       |
| 2s2                | 0,0872* | 0,002*  | 0,02* |                   |       |
| error              |         |         |       |                   |       |

PtCorGO\_H3PO4\_180C\_2\_Pt\_L3\_0065

|                    |         |         |       |                   |       |
|--------------------|---------|---------|-------|-------------------|-------|
| #                  | Pt-O    | Pt-Co   | Pt-Pt | R-factor filtered |       |
| R [Å]              | 1,967*  | 2,65*   |       | 2,682             | 33,43 |
| error              |         |         |       | 0,0087            |       |
| s [Å]              | 0,0778* | 0,0316* | 0,1*  |                   |       |
| error (inaccurate) |         |         |       |                   |       |
| N                  | 0*      | 0*      |       | 10,6              |       |
| error              |         |         |       | 0,81              |       |
| 2s2                | 0,0121* | 0,002*  | 0,02* |                   |       |
| error              |         |         |       |                   |       |

PtCorGO\_H3PO4\_180C\_2\_Pt\_L3\_0066

|                    |         |         |       |                   |       |
|--------------------|---------|---------|-------|-------------------|-------|
| #                  | Pt-O    | Pt-Co   | Pt-Pt | R-factor filtered |       |
| R [Å]              | 1,967*  | 2,65*   |       | 2,629             | 33,43 |
| error              |         |         |       | 0,0098            |       |
| s [Å]              | 0,0707* | 0,0316* | 0,1*  |                   |       |
| error (inaccurate) |         |         |       |                   |       |
| N                  | 0*      | 0*      |       | 9,81              |       |
| error              |         |         |       | 0,81              |       |
| 2s2                | 0,01*   | 0,002*  | 0,02* |                   |       |
| error              |         |         |       |                   |       |

PtCorGO\_H3PO4\_180C\_2\_Pt\_L3\_0067

|                    |         |         |       |                   |       |
|--------------------|---------|---------|-------|-------------------|-------|
| #                  | Pt-O    | Pt-Co   | Pt-Pt | R-factor filtered |       |
| R [Å]              | 1,967*  | 2,65*   |       | 2,71              | 33,43 |
| error              |         |         |       | 0,0092            |       |
| s [Å]              | 0,0707* | 0,0316* | 0,1*  |                   |       |
| error (inaccurate) |         |         |       |                   |       |
| N                  | 0*      | 0*      |       | 9,98              |       |
| error              |         |         |       | 0,81              |       |
| 2s2                | 0,01*   | 0,002*  | 0,02* |                   |       |
| error              |         |         |       |                   |       |

PtCorGO\_H3PO4\_180C\_2\_Pt\_L3\_0068

|                    |         |         |       |                   |       |
|--------------------|---------|---------|-------|-------------------|-------|
| #                  | Pt-O    | Pt-Co   | Pt-Pt | R-factor filtered |       |
| R [Å]              | 2*      | 2,65*   |       | 2,679             | 33,43 |
| error              |         |         |       | 0,01              |       |
| s [Å]              | 0,0316* | 0,0316* | 0,1*  |                   |       |
| error (inaccurate) |         |         |       |                   |       |
| N                  | 0*      | 0*      |       | 9,04              |       |
| error              |         |         |       | 0,81              |       |
| 2s2                | 0,002*  | 0,002*  | 0,02* |                   |       |
| error              |         |         |       |                   |       |

PtCorGO\_H3PO4\_180C\_2\_Pt\_L3\_0070

|                    |           |         |       |                   |       |
|--------------------|-----------|---------|-------|-------------------|-------|
| #                  | Pt-O      | Pt-Co   | Pt-Pt | R-factor filtered |       |
| R [Å]              | 1,876*    | 2,65*   |       | 2,717             | 31,41 |
| error              |           |         |       | 0,0087            |       |
| s [Å]              | 0,000734* | 0,0316* | 0,1*  |                   |       |
| error (inaccurate) |           |         |       |                   |       |
| N                  | 0*        | 0*      |       | 10,6              |       |
| error              |           |         |       | 0,81              |       |
| 2s2                | 1,08E-6*  | 0,002*  | 0,02* |                   |       |
| error              |           |         |       |                   |       |

PtCorGO\_H3PO4\_180C\_2\_Pt\_L3\_0072

|       |         |         |       |                   |       |
|-------|---------|---------|-------|-------------------|-------|
| #     | Pt-O    | Pt-Co   | Pt-Pt | R-factor filtered |       |
| R [Å] | 1,967*  | 2,65*   |       | 2,678             | 31,41 |
| error |         |         |       | 0,0095            |       |
| s [Å] | 0,0707* | 0,0316* | 0,1*  |                   |       |

|                                 |         |         |       |                   |       |
|---------------------------------|---------|---------|-------|-------------------|-------|
| error (inaccurate)              |         |         |       |                   |       |
| N                               | 0*      | 0*      |       | 9,83              |       |
| error                           |         |         |       | 0,81              |       |
| 2s2                             | 0,01*   | 0,002*  | 0,02* |                   |       |
| error                           |         |         |       |                   |       |
| PtCorGO_H3PO4_180C_2_Pt_L3_0073 |         |         |       |                   |       |
| #                               | Pt-O    | Pt-Co   | Pt-Pt | R-factor filtered |       |
| R [Å]                           | 1,967*  | 2,65*   |       | 2,694             | 31,41 |
| error                           |         |         |       | 0,0082            |       |
| s [Å]                           | 0,209*  | 0,0316* | 0,1*  |                   |       |
| error (inaccurate)              |         |         |       |                   |       |
| N                               | 0*      | 0*      |       | 10,5              |       |
| error                           |         |         |       | 0,8               |       |
| 2s2                             | 0,0872* | 0,002*  | 0,02* |                   |       |
| error                           |         |         |       |                   |       |
| PtCorGO_H3PO4_180C_2_Pt_L3_0075 |         |         |       |                   |       |
| #                               | Pt-O    | Pt-Co   | Pt-Pt | R-factor filtered |       |
| R [Å]                           | 1,967*  | 2,65*   |       | 2,7               | 31,41 |
| error                           |         |         |       | 0,0095            |       |
| s [Å]                           | 0,0778* | 0,0316* | 0,1*  |                   |       |
| error (inaccurate)              |         |         |       |                   |       |
| N                               | 0*      | 0*      |       | 9,71              |       |
| error                           |         |         |       | 0,81              |       |
| 2s2                             | 0,0121* | 0,002*  | 0,02* |                   |       |
| error                           |         |         |       |                   |       |
| PtCorGO_H3PO4_180C_2_Pt_L3_0076 |         |         |       |                   |       |
| #                               | Pt-O    | Pt-Co   | Pt-Pt | R-factor filtered |       |
| R [Å]                           | 1,967*  | 2,65*   |       | 2,658             | 31,41 |
| error                           |         |         |       | 0,0099            |       |
| s [Å]                           | 0,0707* | 0,0316* | 0,1*  |                   |       |
| error (inaccurate)              |         |         |       |                   |       |
| N                               | 0*      | 0*      |       | 9,56              |       |
| error                           |         |         |       | 0,81              |       |
| 2s2                             | 0,01*   | 0,002*  | 0,02* |                   |       |
| error                           |         |         |       |                   |       |
| PtCorGO_H3PO4_180C_2_Pt_L3_0077 |         |         |       |                   |       |
| #                               | Pt-O    | Pt-Co   | Pt-Pt | R-factor filtered |       |
| R [Å]                           | 1,967*  | 2,65*   |       | 2,703             | 31,41 |
| error                           |         |         |       | 0,0087            |       |
| s [Å]                           | 0,0707* | 0,0316* | 0,1*  |                   |       |
| error (inaccurate)              |         |         |       |                   |       |
| N                               | 0*      | 0*      |       | 10,6              |       |
| error                           |         |         |       | 0,81              |       |
| 2s2                             | 0,01*   | 0,002*  | 0,02* |                   |       |

error

| <b>Pt-Ni in situ</b>        | <b>Time (min)</b> |
|-----------------------------|-------------------|
| Sample                      |                   |
| PtNiC_dry_Pt_L3             | 0                 |
| PtNiC_dry_140C_Pt_L3        | 0                 |
| PtNiC_H3PO4_140C_Pt_L3_0000 | 3                 |
| PtNiC_H3PO4_140C_Pt_L3_0001 | 6                 |
| PtNiC_H3PO4_140C_Pt_L3_0002 | 9                 |
| PtNiC_H3PO4_140C_Pt_L3_0003 | 12                |
| PtNiC_H3PO4_140C_Pt_L3_0004 | 15                |
| PtNiC_H3PO4_140C_Pt_L3_0005 | 18                |
| PtNiC_H3PO4_140C_Pt_L3_0006 | 21                |
| PtNiC_H3PO4_140C_Pt_L3_0007 | 24                |
| PtNiC_H3PO4_140C_Pt_L3_0008 | 27                |
| PtNiC_H3PO4_140C_Pt_L3_0009 | 30                |
| PtNiC_H3PO4_140C_Pt_L3_0010 | 33                |
| PtNiC_H3PO4_140C_Pt_L3_0011 | 36                |
| PtNiC_H3PO4_140C_Pt_L3_0012 | 39                |
| PtNiC_H3PO4_140C_Pt_L3_0013 | 42                |
| PtNiC_H3PO4_140C_Pt_L3_0014 | 45                |
| PtNiC_H3PO4_140C_Pt_L3_0015 | 48                |
| PtNiC_H3PO4_140C_Pt_L3_0016 | 51                |
| PtNiC_H3PO4_140C_Pt_L3_0017 | 54                |
| PtNiC_H3PO4_140C_Pt_L3_0018 | 57                |
| PtNiC_H3PO4_140C_Pt_L3_0019 | 60                |
| PtNiC_H3PO4_140C_Pt_L3_0020 | 63                |
| PtNiC_H3PO4_140C_Pt_L3_0021 | 66                |
| PtNiC_H3PO4_140C_Pt_L3_0022 | 69                |
| PtNiC_H3PO4_140C_Pt_L3_0023 | 72                |
| PtNiC_H3PO4_140C_Pt_L3_0024 | 75                |
| PtNiC_H3PO4_140C_Pt_L3_0025 | 78                |
| PtNiC_H3PO4_140C_Pt_L3_0026 | 81                |
| PtNiC_H3PO4_140C_Pt_L3_0027 | 84                |
| PtNiC_H3PO4_140C_Pt_L3_0028 | 87                |
| PtNiC_H3PO4_140C_Pt_L3_0029 | 90                |
| PtNiC_H3PO4_140C_Pt_L3_0030 | 93                |
| PtNiC_H3PO4_140C_Pt_L3_0031 | 96                |
| PtNiC_H3PO4_140C_Pt_L3_0032 | 99                |
| PtNiC_H3PO4_140C_Pt_L3_0033 | 102               |
| PtNiC_H3PO4_140C_Pt_L3_0034 | 105               |
| PtNiC_H3PO4_140C_Pt_L3_0035 | 108               |
| PtNiC_H3PO4_140C_Pt_L3_0036 | 111               |
| PtNiC_H3PO4_140C_Pt_L3_0037 | 114               |
| PtNiC_H3PO4_140C_Pt_L3_0038 | 117               |
| PtNiC_H3PO4_140C_Pt_L3_0039 | 120               |
| PtNiC_H3PO4_140C_Pt_L3_0040 | 123               |
| PtNiC_H3PO4_140C_Pt_L3_0041 | 126               |
| PtNiC_H3PO4_140C_Pt_L3_0042 | 129               |
| PtNiC_H3PO4_140C_Pt_L3_0043 | 132               |

|                             |     |
|-----------------------------|-----|
| PtNiC_H3PO4_140C_Pt_L3_0044 | 135 |
| PtNiC_H3PO4_140C_Pt_L3_0045 | 138 |
| PtNiC_H3PO4_140C_Pt_L3_0046 | 141 |
| PtNiC_H3PO4_140C_Pt_L3_0047 | 144 |
| PtNiC_H3PO4_140C_Pt_L3_0048 | 147 |
| PtNiC_H3PO4_140C_Pt_L3_0049 | 150 |
| PtNiC_H3PO4_140C_Pt_L3_0050 | 153 |
| PtNiC_H3PO4_140C_Pt_L3_0051 | 156 |
| PtNiC_H3PO4_140C_Pt_L3_0052 | 159 |
| PtNiC_H3PO4_140C_Pt_L3_0053 | 162 |
| PtNiC_H3PO4_140C_Pt_L3_0054 | 165 |
| PtNiC_H3PO4_140C_Pt_L3_0055 | 168 |
| PtNiC_H3PO4_140C_Pt_L3_0056 | 171 |
| PtNiC_H3PO4_140C_Pt_L3_0057 | 174 |
| PtNiC_H3PO4_140C_Pt_L3_0058 | 177 |
| PtNiC_H3PO4_140C_Pt_L3_0059 | 180 |
| PtNiC_H3PO4_140C_Pt_L3_0060 | 183 |
| PtNiC_H3PO4_140C_Pt_L3_0061 | 186 |
| PtNiC_H3PO4_140C_Pt_L3_0062 | 189 |
| PtNiC_H3PO4_140C_Pt_L3_0063 | 192 |
| PtNiC_H3PO4_140C_Pt_L3_0064 | 195 |
| PtNiC_H3PO4_140C_Pt_L3_0065 | 198 |
| PtNiC_H3PO4_140C_Pt_L3_0066 | 201 |
| PtNiC_H3PO4_140C_Pt_L3_0067 | 204 |
| PtNiC_H3PO4_140C_Pt_L3_0068 | 207 |
| PtNiC_H3PO4_140C_Pt_L3_0069 | 210 |
| PtNiC_H3PO4_140C_Pt_L3_0070 | 213 |
| PtNiC_H3PO4_140C_Pt_L3_0071 | 216 |
| PtNiC_H3PO4_140C_Pt_L3_0072 | 219 |
| PtNiC_H3PO4_140C_Pt_L3_0073 | 222 |
| PtNiC_H3PO4_140C_Pt_L3_0074 | 225 |
| PtNiC_H3PO4_140C_Pt_L3_0075 | 228 |
| PtNiC_H3PO4_140C_Pt_L3_0076 | 231 |
| PtNiC_H3PO4_140C_Pt_L3_0077 | 234 |
| PtNiC_H3PO4_140C_Pt_L3_0078 | 237 |
| PtNiC_H3PO4_140C_Pt_L3_0079 | 240 |



## PtNiC\_dry\_Pt\_L3

| #                  | Pt-O  | Pt-Ni | Pt-Pt | R-factor filtered |       |
|--------------------|-------|-------|-------|-------------------|-------|
| R [Å]              | 1,999 | 2,615 |       | 2,69              | 16,67 |
| error              | 0,025 | 0,013 |       | 0,0096            |       |
| s [Å]              | 0,1*  | 0,1*  |       | 0,0764            |       |
| error (inaccurate) |       |       |       | 0,018             |       |
| N                  | 1,9   | 3,07  |       | 2,8               |       |
| error              | 0,41  | 0,6   |       | 1,6               |       |
| 2s2                | 0,02* | 0,02* |       | 0,0117            |       |
| error              |       |       |       | 0,0054            |       |

## PtNiC\_dry\_140C\_Pt\_L3

| #                  | Pt-O  | Pt-Ni | Pt-Pt | R-factor filtered |       |
|--------------------|-------|-------|-------|-------------------|-------|
| R [Å]              | 2,006 | 2,615 |       | 2,696             | 16,67 |
| error              | 0,031 | 0,016 |       | 0,012             |       |
| s [Å]              | 0,1*  | 0,1*  |       | 0,0777            |       |
| error (inaccurate) |       |       |       | 0,022             |       |
| N                  | 1,74  | 2,69  |       | 2,39              |       |
| error              | 0,41  | 0,61  |       | 1,6               |       |
| 2s2                | 0,02* | 0,02* |       | 0,0121            |       |
| error              |       |       |       | 0,0065            |       |

## PtNiC\_H3PO4\_140C\_Pt\_L3\_0000

| #                  | Pt-O  | Pt-Ni | Pt-Pt | R-factor filtered |       |
|--------------------|-------|-------|-------|-------------------|-------|
| R [Å]              | 1,996 | 2,617 |       | 2,696             | 16,67 |
| error              | 0,033 | 0,016 |       | 0,011             |       |
| s [Å]              | 0,1*  | 0,1*  |       | 0,0778            |       |
| error (inaccurate) |       |       |       | 0,019             |       |
| N                  | 1,51  | 2,66  |       | 2,65              |       |
| error              | 0,41  | 0,61  |       | 1,6               |       |
| 2s2                | 0,02* | 0,02* |       | 0,0121            |       |
| error              |       |       |       | 0,0059            |       |

## PtNiC\_H3PO4\_140C\_Pt\_L3\_0001

| #                  | Pt-O  | Pt-Ni | Pt-Pt | R-factor filtered |       |
|--------------------|-------|-------|-------|-------------------|-------|
| R [Å]              | 1,9*  | 2,613 |       | 2,703             | 16,67 |
| error              |       | 0,019 |       | 0,0096            |       |
| s [Å]              | 0,1*  | 0,1*  |       | 0,0705            |       |
| error (inaccurate) |       |       |       | 0,017             |       |
| N                  | 0*    | 2,66  |       | 2,93              |       |
| error              |       | 0,65  |       | 1,5               |       |
| 2s2                | 0,02* | 0,02* |       | 0,00993           |       |
| error              |       |       |       | 0,0048            |       |

## PtNiC\_H3PO4\_140C\_Pt\_L3\_0002

| #     | Pt-O | Pt-Ni | Pt-Pt | R-factor filtered |       |
|-------|------|-------|-------|-------------------|-------|
| R [Å] | 1,9* | 2,622 |       | 2,705             | 16,67 |
| error |      | 0,016 |       | 0,011             |       |

|                    |       |       |        |
|--------------------|-------|-------|--------|
| s [Å]              | 0,1*  | 0,1*  | 0,0858 |
| error (inaccurate) |       |       | 0,014  |
| N                  | 0*    | 2,95  | 3,78   |
| error              |       | 0,6   | 1,8    |
| 2s2                | 0,02* | 0,02* | 0,0147 |
| error              |       |       | 0,0049 |

#### PtNiC\_H3PO4\_140C\_Pt\_L3\_0003

| #                  | Pt-O  | Pt-Ni | Pt-Pt | R-factor filtered |       |
|--------------------|-------|-------|-------|-------------------|-------|
| R [Å]              | 1,9*  | 2,616 |       | 2,705             | 16,67 |
| error              |       | 0,018 |       | 0,0096            |       |
| s [Å]              | 0,1*  | 0,1*  |       | 0,081             |       |
| error (inaccurate) |       |       |       | 0,014             |       |
| N                  | 0*    | 2,64  |       | 3,92              |       |
| error              |       | 0,63  |       | 1,7               |       |
| 2s2                | 0,02* | 0,02* |       | 0,0131            |       |
| error              |       |       |       | 0,0043            |       |

#### PtNiC\_H3PO4\_140C\_Pt\_L3\_0004

| #                  | Pt-O  | Pt-Ni | Pt-Pt | R-factor filtered |       |
|--------------------|-------|-------|-------|-------------------|-------|
| R [Å]              | 1,9*  | 2,611 |       | 2,706             | 16,67 |
| error              |       | 0,017 |       | 0,01              |       |
| s [Å]              | 0,1*  | 0,1*  |       | 0,0786            |       |
| error (inaccurate) |       |       |       | 0,015             |       |
| N                  | 0*    | 2,92  |       | 3,45              |       |
| error              |       | 0,64  |       | 1,7               |       |
| 2s2                | 0,02* | 0,02* |       | 0,0124            |       |
| error              |       |       |       | 0,0047            |       |

#### PtNiC\_H3PO4\_140C\_Pt\_L3\_0005

| #                  | Pt-O  | Pt-Ni | Pt-Pt | R-factor filtered |       |
|--------------------|-------|-------|-------|-------------------|-------|
| R [Å]              | 1,9*  | 2,618 |       | 2,707             | 16,67 |
| error              |       | 0,016 |       | 0,011             |       |
| s [Å]              | 0,1*  | 0,1*  |       | 0,0827            |       |
| error (inaccurate) |       |       |       | 0,016             |       |
| N                  | 0*    | 3,08  |       | 3,41              |       |
| error              |       | 0,62  |       | 1,8               |       |
| 2s2                | 0,02* | 0,02* |       | 0,0137            |       |
| error              |       |       |       | 0,0051            |       |

#### PtNiC\_H3PO4\_140C\_Pt\_L3\_0006

| #                  | Pt-O | Pt-Ni | Pt-Pt | R-factor filtered |       |
|--------------------|------|-------|-------|-------------------|-------|
| R [Å]              | 1,9* | 2,617 |       | 2,701             | 16,67 |
| error              |      | 0,017 |       | 0,0099            |       |
| s [Å]              | 0,1* | 0,1*  |       | 0,0813            |       |
| error (inaccurate) |      |       |       | 0,014             |       |
| N                  | 0*   | 2,79  |       | 3,73              |       |
| error              |      | 0,62  |       | 1,7               |       |

|       |       |       |        |
|-------|-------|-------|--------|
| 2s2   | 0,02* | 0,02* | 0,0132 |
| error |       |       | 0,0046 |

#### PtNiC\_H3PO4\_140C\_Pt\_L3\_0007

| #                  | Pt-O  | Pt-Ni | Pt-Pt | R-factor filtered |
|--------------------|-------|-------|-------|-------------------|
| R [Å]              | 2*    | 2,603 |       | 2,707 16,67       |
| error              |       | 0,017 |       | 0,011             |
| s [Å]              | 0,1*  | 0,1*  |       | 0,0815            |
| error (inaccurate) |       |       |       | 0,015             |
| N                  | 0*    | 2,73  |       | 3,7               |
| error              |       | 0,63  |       | 1,8               |
| 2s2                | 0,02* | 0,02* |       | 0,0133            |
| error              |       |       |       | 0,0047            |

#### PtNiC\_H3PO4\_140C\_Pt\_L3\_0008

| #                  | Pt-O  | Pt-Ni | Pt-Pt | R-factor filtered |
|--------------------|-------|-------|-------|-------------------|
| R [Å]              | 1,9*  | 2,617 |       | 2,703 16,67       |
| error              |       | 0,016 |       | 0,011             |
| s [Å]              | 0,1*  | 0,1*  |       | 0,0834            |
| error (inaccurate) |       |       |       | 0,015             |
| N                  | 0*    | 3,02  |       | 3,51              |
| error              |       | 0,62  |       | 1,8               |
| 2s2                | 0,02* | 0,02* |       | 0,0139            |
| error              |       |       |       | 0,0051            |

#### PtNiC\_H3PO4\_140C\_Pt\_L3\_0009

| #                  | Pt-O  | Pt-Ni | Pt-Pt | R-factor filtered |
|--------------------|-------|-------|-------|-------------------|
| R [Å]              | 1,9*  | 2,627 |       | 2,701 16,67       |
| error              |       | 0,019 |       | 0,0094            |
| s [Å]              | 0,1*  | 0,1*  |       | 0,0821            |
| error (inaccurate) |       |       |       | 0,013             |
| N                  | 0*    | 2,56  |       | 4,05              |
| error              |       | 0,61  |       | 1,7               |
| 2s2                | 0,02* | 0,02* |       | 0,0135            |
| error              |       |       |       | 0,0042            |

#### PtNiC\_H3PO4\_140C\_Pt\_L3\_0010

| #                  | Pt-O  | Pt-Ni | Pt-Pt | R-factor filtered |
|--------------------|-------|-------|-------|-------------------|
| R [Å]              | 2*    | 2,602 |       | 2,704 16,67       |
| error              |       | 0,017 |       | 0,0099            |
| s [Å]              | 0,1*  | 0,1*  |       | 0,0808            |
| error (inaccurate) |       |       |       | 0,013             |
| N                  | 0*    | 2,69  |       | 3,91              |
| error              |       | 0,63  |       | 1,7               |
| 2s2                | 0,02* | 0,02* |       | 0,0131            |
| error              |       |       |       | 0,0043            |

#### PtNiC\_H3PO4\_140C\_Pt\_L3\_0011

| #                  | Pt-O  | Pt-Ni | Pt-Pt | R-factor filtered |       |
|--------------------|-------|-------|-------|-------------------|-------|
| R [Å]              | 1,9*  | 2,608 |       | 2,704             | 17,35 |
| error              |       | 0,016 |       | 0,01              |       |
| s [Å]              | 0,1*  | 0,1*  |       | 0,077             |       |
| error (inaccurate) |       |       |       | 0,016             |       |
| N                  | 0*    | 3,08  |       | 3,12              |       |
| error              |       | 0,64  |       | 1,6               |       |
| 2s2                | 0,02* | 0,02* |       | 0,0119            |       |
| error              |       |       |       | 0,0049            |       |

#### PtNiC\_H3PO4\_140C\_Pt\_L3\_0012

| #                  | Pt-O  | Pt-Ni | Pt-Pt | R-factor filtered |       |
|--------------------|-------|-------|-------|-------------------|-------|
| R [Å]              | 1,9*  | 2,612 |       | 2,701             | 17,35 |
| error              |       | 0,017 |       | 0,0099            |       |
| s [Å]              | 0,1*  | 0,1*  |       | 0,0811            |       |
| error (inaccurate) |       |       |       | 0,014             |       |
| N                  | 0*    | 2,78  |       | 3,74              |       |
| error              |       | 0,63  |       | 1,7               |       |
| 2s2                | 0,02* | 0,02* |       | 0,0131            |       |
| error              |       |       |       | 0,0045            |       |

#### PtNiC\_H3PO4\_140C\_Pt\_L3\_0013

| #                  | Pt-O  | Pt-Ni | Pt-Pt | R-factor filtered |       |
|--------------------|-------|-------|-------|-------------------|-------|
| R [Å]              | 1,9*  | 2,597 |       | 2,701             | 17,35 |
| error              |       | 0,019 |       | 0,0092            |       |
| s [Å]              | 0,1*  | 0,1*  |       | 0,0746            |       |
| error (inaccurate) |       |       |       | 0,014             |       |
| N                  | 0*    | 2,46  |       | 3,66              |       |
| error              |       | 0,65  |       | 1,6               |       |
| 2s2                | 0,02* | 0,02* |       | 0,0111            |       |
| error              |       |       |       | 0,0041            |       |

#### PtNiC\_H3PO4\_140C\_Pt\_L3\_0014

| #                  | Pt-O  | Pt-Ni | Pt-Pt | R-factor filtered |       |
|--------------------|-------|-------|-------|-------------------|-------|
| R [Å]              | 1,9*  | 2,611 |       | 2,711             | 17,35 |
| error              |       | 0,016 |       | 0,0099            |       |
| s [Å]              | 0,1*  | 0,1*  |       | 0,0773            |       |
| error (inaccurate) |       |       |       | 0,015             |       |
| N                  | 0*    | 3,04  |       | 3,43              |       |
| error              |       | 0,64  |       | 1,7               |       |
| 2s2                | 0,02* | 0,02* |       | 0,0119            |       |
| error              |       |       |       | 0,0046            |       |

#### PtNiC\_H3PO4\_140C\_Pt\_L3\_0015

| #     | Pt-O | Pt-Ni | Pt-Pt | R-factor filtered |       |
|-------|------|-------|-------|-------------------|-------|
| R [Å] | 1,9* | 2,619 |       | 2,701             | 17,35 |
| error |      | 0,016 |       | 0,011             |       |
| s [Å] | 0,1* | 0,1*  |       | 0,0838            |       |

|                    |       |       |        |
|--------------------|-------|-------|--------|
| error (inaccurate) |       |       | 0,016  |
| N                  | 0*    | 3,2   | 3,45   |
| error              |       | 0,61  | 1,8    |
| 2s2                | 0,02* | 0,02* | 0,014  |
| error              |       |       | 0,0052 |

#### PtNiC\_H3PO4\_140C\_Pt\_L3\_0016

| #                  | Pt-O  | Pt-Ni | Pt-Pt  | R-factor filtered |
|--------------------|-------|-------|--------|-------------------|
| R [Å]              | 1,9*  | 2,609 | 2,705  | 17,35             |
| error              |       | 0,018 | 0,0093 |                   |
| s [Å]              | 0,1*  | 0,1*  | 0,0799 |                   |
| error (inaccurate) |       |       | 0,013  |                   |
| N                  | 0*    | 2,62  | 4,04   |                   |
| error              |       | 0,64  | 1,7    |                   |
| 2s2                | 0,02* | 0,02* | 0,0128 |                   |
| error              |       |       | 0,0041 |                   |

#### PtNiC\_H3PO4\_140C\_Pt\_L3\_0017

| #                  | Pt-O  | Pt-Ni | Pt-Pt  | R-factor filtered |
|--------------------|-------|-------|--------|-------------------|
| R [Å]              | 2*    | 2,597 | 2,703  | 17,35             |
| error              |       | 0,018 | 0,0093 |                   |
| s [Å]              | 0,1*  | 0,1*  | 0,0719 |                   |
| error (inaccurate) |       |       | 0,015  |                   |
| N                  | 0*    | 2,74  | 3,36   |                   |
| error              |       | 0,65  | 1,6    |                   |
| 2s2                | 0,02* | 0,02* | 0,0103 |                   |
| error              |       |       | 0,0043 |                   |

#### PtNiC\_H3PO4\_140C\_Pt\_L3\_0018

| #                  | Pt-O  | Pt-Ni | Pt-Pt  | R-factor filtered |
|--------------------|-------|-------|--------|-------------------|
| R [Å]              | 1,9*  | 2,612 | 2,704  | 17,35             |
| error              |       | 0,016 | 0,0099 |                   |
| s [Å]              | 0,1*  | 0,1*  | 0,079  |                   |
| error (inaccurate) |       |       | 0,015  |                   |
| N                  | 0*    | 2,96  | 3,49   |                   |
| error              |       | 0,63  | 1,7    |                   |
| 2s2                | 0,02* | 0,02* | 0,0125 |                   |
| error              |       |       | 0,0045 |                   |

#### PtNiC\_H3PO4\_140C\_Pt\_L3\_0019

| #                  | Pt-O  | Pt-Ni | Pt-Pt  | R-factor filtered |
|--------------------|-------|-------|--------|-------------------|
| R [Å]              | 1,9*  | 2,614 | 2,697  | 17,35             |
| error              |       | 0,018 | 0,0092 |                   |
| s [Å]              | 0,1*  | 0,1*  | 0,0812 |                   |
| error (inaccurate) |       |       | 0,013  |                   |
| N                  | 0*    | 2,58  | 4      |                   |
| error              |       | 0,62  | 1,7    |                   |
| 2s2                | 0,02* | 0,02* | 0,0132 |                   |

error 0,0041

PtNiC\_H3PO4\_140C\_Pt\_L3\_0020

| #                  | Pt-O  | Pt-Ni | Pt-Pt | R-factor filtered |       |
|--------------------|-------|-------|-------|-------------------|-------|
| R [Å]              | 2*    | 2,609 |       | 2,699             | 17,35 |
| error              |       | 0,017 |       | 0,0097            |       |
| s [Å]              | 0,1*  | 0,1*  |       | 0,0799            |       |
| error (inaccurate) |       |       |       | 0,014             |       |
| N                  | 0*    | 2,93  |       | 3,63              |       |
| error              |       | 0,63  |       | 1,7               |       |
| 2s2                | 0,02* | 0,02* |       | 0,0128            |       |
| error              |       |       |       | 0,0044            |       |

PtNiC\_H3PO4\_140C\_Pt\_L3\_0021

| #                  | Pt-O  | Pt-Ni | Pt-Pt | R-factor filtered |       |
|--------------------|-------|-------|-------|-------------------|-------|
| R [Å]              | 1,9*  | 2,616 |       | 2,711             | 18,05 |
| error              |       | 0,016 |       | 0,011             |       |
| s [Å]              | 0,1*  | 0,1*  |       | 0,0813            |       |
| error (inaccurate) |       |       |       | 0,015             |       |
| N                  | 0*    | 3,01  |       | 3,49              |       |
| error              |       | 0,63  |       | 1,7               |       |
| 2s2                | 0,02* | 0,02* |       | 0,0132            |       |
| error              |       |       |       | 0,0049            |       |

PtNiC\_H3PO4\_140C\_Pt\_L3\_0022

| #                  | Pt-O  | Pt-Ni | Pt-Pt | R-factor filtered |       |
|--------------------|-------|-------|-------|-------------------|-------|
| R [Å]              | 1,9*  | 2,614 |       | 2,701             | 18,05 |
| error              |       | 0,018 |       | 0,0093            |       |
| s [Å]              | 0,1*  | 0,1*  |       | 0,0808            |       |
| error (inaccurate) |       |       |       | 0,013             |       |
| N                  | 0*    | 2,51  |       | 4,04              |       |
| error              |       | 0,63  |       | 1,7               |       |
| 2s2                | 0,02* | 0,02* |       | 0,0131            |       |
| error              |       |       |       | 0,0042            |       |

PtNiC\_H3PO4\_140C\_Pt\_L3\_0023

| #                  | Pt-O  | Pt-Ni | Pt-Pt | R-factor filtered |       |
|--------------------|-------|-------|-------|-------------------|-------|
| R [Å]              | 1,9*  | 2,599 |       | 2,699             | 18,05 |
| error              |       | 0,018 |       | 0,0091            |       |
| s [Å]              | 0,1*  | 0,1*  |       | 0,0767            |       |
| error (inaccurate) |       |       |       | 0,014             |       |
| N                  | 0*    | 2,6   |       | 3,81              |       |
| error              |       | 0,64  |       | 1,7               |       |
| 2s2                | 0,02* | 0,02* |       | 0,0118            |       |
| error              |       |       |       | 0,0041            |       |

PtNiC\_H3PO4\_140C\_Pt\_L3\_0024

| # | Pt-O | Pt-Ni | Pt-Pt | R-factor filtered |  |
|---|------|-------|-------|-------------------|--|
|---|------|-------|-------|-------------------|--|

|                    |       |       |        |       |
|--------------------|-------|-------|--------|-------|
| R [Å]              | 1,9*  | 2,603 | 2,714  | 18,05 |
| error              |       | 0,016 | 0,011  |       |
| s [Å]              | 0,1*  | 0,1*  | 0,0754 |       |
| error (inaccurate) |       |       | 0,018  |       |
| N                  | 0*    | 3,27  | 2,87   |       |
| error              |       | 0,63  | 1,6    |       |
| 2s2                | 0,02* | 0,02* | 0,0114 |       |
| error              |       |       | 0,0053 |       |

#### PtNiC\_H3PO4\_140C\_Pt\_L3\_0025

| #                  | Pt-O  | Pt-Ni | Pt-Pt  | R-factor filtered |
|--------------------|-------|-------|--------|-------------------|
| R [Å]              | 1,9*  | 2,611 | 2,703  | 18,05             |
| error              |       | 0,018 | 0,0097 |                   |
| s [Å]              | 0,1*  | 0,1*  | 0,0825 |                   |
| error (inaccurate) |       |       | 0,013  |                   |
| N                  | 0*    | 2,55  | 4,07   |                   |
| error              |       | 0,62  | 1,8    |                   |
| 2s2                | 0,02* | 0,02* | 0,0136 |                   |
| error              |       |       | 0,0043 |                   |

#### PtNiC\_H3PO4\_140C\_Pt\_L3\_0026

| #                  | Pt-O  | Pt-Ni | Pt-Pt  | R-factor filtered |
|--------------------|-------|-------|--------|-------------------|
| R [Å]              | 1,9*  | 2,601 | 2,702  | 18,05             |
| error              |       | 0,019 | 0,0089 |                   |
| s [Å]              | 0,1*  | 0,1*  | 0,0761 |                   |
| error (inaccurate) |       |       | 0,013  |                   |
| N                  | 0*    | 2,36  | 3,98   |                   |
| error              |       | 0,65  | 1,7    |                   |
| 2s2                | 0,02* | 0,02* | 0,0116 |                   |
| error              |       |       | 0,004  |                   |

#### PtNiC\_H3PO4\_140C\_Pt\_L3\_0027

| #                  | Pt-O  | Pt-Ni | Pt-Pt  | R-factor filtered |
|--------------------|-------|-------|--------|-------------------|
| R [Å]              | 1,9*  | 2,608 | 2,708  | 18,05             |
| error              |       | 0,016 | 0,01   |                   |
| s [Å]              | 0,1*  | 0,1*  | 0,0765 |                   |
| error (inaccurate) |       |       | 0,015  |                   |
| N                  | 0*    | 2,98  | 3,35   |                   |
| error              |       | 0,64  | 1,6    |                   |
| 2s2                | 0,02* | 0,02* | 0,0117 |                   |
| error              |       |       | 0,0046 |                   |

#### PtNiC\_H3PO4\_140C\_Pt\_L3\_0028

| #                  | Pt-O | Pt-Ni | Pt-Pt  | R-factor filtered |
|--------------------|------|-------|--------|-------------------|
| R [Å]              | 2*   | 2,613 | 2,703  | 18,05             |
| error              |      | 0,017 | 0,01   |                   |
| s [Å]              | 0,1* | 0,1*  | 0,0836 |                   |
| error (inaccurate) |      |       | 0,014  |                   |

|       |       |       |        |
|-------|-------|-------|--------|
| N     | 0*    | 2,8   | 3,91   |
| error |       | 0,62  | 1,8    |
| 2s2   | 0,02* | 0,02* | 0,014  |
| error |       |       | 0,0045 |

#### PtNiC\_H3PO4\_140C\_Pt\_L3\_0029

| #                  | Pt-O  | Pt-Ni | Pt-Pt  | R-factor filtered |
|--------------------|-------|-------|--------|-------------------|
| R [Å]              | 1,9*  | 2,607 | 2,698  | 18,05             |
| error              |       | 0,018 | 0,0091 |                   |
| s [Å]              | 0,1*  | 0,1*  | 0,0718 |                   |
| error (inaccurate) |       |       | 0,016  |                   |
| N                  | 0*    | 2,67  | 3,3    |                   |
| error              |       | 0,65  | 1,6    |                   |
| 2s2                | 0,02* | 0,02* | 0,0103 |                   |
| error              |       |       | 0,0044 |                   |

#### PtNiC\_H3PO4\_140C\_Pt\_L3\_0030

| #                  | Pt-O  | Pt-Ni | Pt-Pt  | R-factor filtered |
|--------------------|-------|-------|--------|-------------------|
| R [Å]              | 1,9*  | 2,605 | 2,708  | 18,05             |
| error              |       | 0,016 | 0,01   |                   |
| s [Å]              | 0,1*  | 0,1*  | 0,0779 |                   |
| error (inaccurate) |       |       | 0,016  |                   |
| N                  | 0*    | 3     | 3,38   |                   |
| error              |       | 0,64  | 1,7    |                   |
| 2s2                | 0,02* | 0,02* | 0,0121 |                   |
| error              |       |       | 0,0048 |                   |

#### PtNiC\_H3PO4\_140C\_Pt\_L3\_0031

| #                  | Pt-O  | Pt-Ni | Pt-Pt  | R-factor filtered |
|--------------------|-------|-------|--------|-------------------|
| R [Å]              | 1,9*  | 2,615 | 2,701  | 17,16             |
| error              |       | 0,017 | 0,0097 |                   |
| s [Å]              | 0,1*  | 0,1*  | 0,0774 |                   |
| error (inaccurate) |       |       | 0,015  |                   |
| N                  | 0*    | 2,96  | 3,38   |                   |
| error              |       | 0,63  | 1,7    |                   |
| 2s2                | 0,02* | 0,02* | 0,012  |                   |
| error              |       |       | 0,0047 |                   |

#### PtNiC\_H3PO4\_140C\_Pt\_L3\_0032

| #                  | Pt-O  | Pt-Ni | Pt-Pt  | R-factor filtered |
|--------------------|-------|-------|--------|-------------------|
| R [Å]              | 1,9*  | 2,621 | 2,701  | 17,16             |
| error              |       | 0,018 | 0,009  |                   |
| s [Å]              | 0,1*  | 0,1*  | 0,0822 |                   |
| error (inaccurate) |       |       | 0,012  |                   |
| N                  | 0*    | 2,49  | 4,29   |                   |
| error              |       | 0,61  | 1,7    |                   |
| 2s2                | 0,02* | 0,02* | 0,0135 |                   |
| error              |       |       | 0,004  |                   |



## PtNiC\_H3PO4\_140C\_Pt\_L3\_0033

| #                  | Pt-O  | Pt-Ni | Pt-Pt | R-factor filtered |       |
|--------------------|-------|-------|-------|-------------------|-------|
| R [Å]              | 1,9*  | 2,593 |       | 2,706             | 17,16 |
| error              |       | 0,017 |       | 0,0095            |       |
| s [Å]              | 0,1*  | 0,1*  |       | 0,0732            |       |
| error (inaccurate) |       |       |       | 0,015             |       |
| N                  | 0*    | 2,8   |       | 3,46              |       |
| error              |       | 0,64  |       | 1,6               |       |
| 2s2                | 0,02* | 0,02* |       | 0,0107            |       |
| error              |       |       |       | 0,0043            |       |

## PtNiC\_H3PO4\_140C\_Pt\_L3\_0034

| #                  | Pt-O  | Pt-Ni | Pt-Pt | R-factor filtered |       |
|--------------------|-------|-------|-------|-------------------|-------|
| R [Å]              | 1,9*  | 2,613 |       | 2,707             | 17,16 |
| error              |       | 0,016 |       | 0,011             |       |
| s [Å]              | 0,1*  | 0,1*  |       | 0,0804            |       |
| error (inaccurate) |       |       |       | 0,016             |       |
| N                  | 0*    | 3     |       | 3,39              |       |
| error              |       | 0,63  |       | 1,7               |       |
| 2s2                | 0,02* | 0,02* |       | 0,0129            |       |
| error              |       |       |       | 0,0049            |       |

## PtNiC\_H3PO4\_140C\_Pt\_L3\_0035

| #                  | Pt-O  | Pt-Ni | Pt-Pt | R-factor filtered |       |
|--------------------|-------|-------|-------|-------------------|-------|
| R [Å]              | 1,9*  | 2,615 |       | 2,701             | 17,16 |
| error              |       | 0,018 |       | 0,0095            |       |
| s [Å]              | 0,1*  | 0,1*  |       | 0,0806            |       |
| error (inaccurate) |       |       |       | 0,014             |       |
| N                  | 0*    | 2,64  |       | 3,85              |       |
| error              |       | 0,63  |       | 1,7               |       |
| 2s2                | 0,02* | 0,02* |       | 0,013             |       |
| error              |       |       |       | 0,0043            |       |

## PtNiC\_H3PO4\_140C\_Pt\_L3\_0036

| #                  | Pt-O  | Pt-Ni | Pt-Pt | R-factor filtered |       |
|--------------------|-------|-------|-------|-------------------|-------|
| R [Å]              | 1,9*  | 2,604 |       | 2,702             | 17,16 |
| error              |       | 0,017 |       | 0,0097            |       |
| s [Å]              | 0,1*  | 0,1*  |       | 0,0711            |       |
| error (inaccurate) |       |       |       | 0,017             |       |
| N                  | 0*    | 3,04  |       | 3                 |       |
| error              |       | 0,65  |       | 1,6               |       |
| 2s2                | 0,02* | 0,02* |       | 0,0101            |       |
| error              |       |       |       | 0,0048            |       |

## PtNiC\_H3PO4\_140C\_Pt\_L3\_0037

| #     | Pt-O | Pt-Ni | Pt-Pt | R-factor filtered |       |
|-------|------|-------|-------|-------------------|-------|
| R [Å] | 1,9* | 2,606 |       | 2,709             | 17,16 |

|                    |       |       |        |
|--------------------|-------|-------|--------|
| error              |       | 0,017 | 0,0096 |
| s [Å]              | 0,1*  | 0,1*  | 0,0777 |
| error (inaccurate) |       |       | 0,014  |
| N                  | 0*    | 2,75  | 3,69   |
| error              |       | 0,64  | 1,7    |
| 2s2                | 0,02* | 0,02* | 0,0121 |
| error              |       |       | 0,0044 |

#### PtNiC\_H3PO4\_140C\_Pt\_L3\_0038

| #                  | Pt-O  | Pt-Ni | Pt-Pt | R-factor filtered |       |
|--------------------|-------|-------|-------|-------------------|-------|
| R [Å]              | 2*    | 2,62  |       | 2,698             | 17,16 |
| error              |       | 0,012 |       | 0,0076            |       |
| s [Å]              | 0,1*  | 0,1*  |       | 0,082             |       |
| error (inaccurate) |       |       |       | 0,014             |       |
| N                  | 0*    | 2,73  |       | 3,9               |       |
| error              |       | 0,6   |       | 1,8               |       |
| 2s2                | 0,02* | 0,02* |       | 0,0135            |       |
| error              |       |       |       | 0,0045            |       |

#### PtNiC\_H3PO4\_140C\_Pt\_L3\_0039

| #                  | Pt-O  | Pt-Ni | Pt-Pt | R-factor filtered |       |
|--------------------|-------|-------|-------|-------------------|-------|
| R [Å]              | 1,9*  | 2,601 |       | 2,703             | 17,16 |
| error              |       | 0,018 |       | 0,009             |       |
| s [Å]              | 0,1*  | 0,1*  |       | 0,0774            |       |
| error (inaccurate) |       |       |       | 0,013             |       |
| N                  | 0*    | 2,55  |       | 3,95              |       |
| error              |       | 0,64  |       | 1,7               |       |
| 2s2                | 0,02* | 0,02* |       | 0,012             |       |
| error              |       |       |       | 0,004             |       |

#### PtNiC\_H3PO4\_140C\_Pt\_L3\_0040

| #                  | Pt-O  | Pt-Ni | Pt-Pt | R-factor filtered |       |
|--------------------|-------|-------|-------|-------------------|-------|
| R [Å]              | 1,9*  | 2,607 |       | 2,708             | 17,16 |
| error              |       | 0,016 |       | 0,01              |       |
| s [Å]              | 0,1*  | 0,1*  |       | 0,0766            |       |
| error (inaccurate) |       |       |       | 0,016             |       |
| N                  | 0*    | 3,05  |       | 3,29              |       |
| error              |       | 0,64  |       | 1,6               |       |
| 2s2                | 0,02* | 0,02* |       | 0,0117            |       |
| error              |       |       |       | 0,0047            |       |

#### PtNiC\_H3PO4\_140C\_Pt\_L3\_0041

| #                  | Pt-O | Pt-Ni | Pt-Pt | R-factor filtered |       |
|--------------------|------|-------|-------|-------------------|-------|
| R [Å]              | 1,9* | 2,616 |       | 2,703             | 16,51 |
| error              |      | 0,018 |       | 0,0096            |       |
| s [Å]              | 0,1* | 0,1*  |       | 0,0801            |       |
| error (inaccurate) |      |       |       | 0,014             |       |
| N                  | 0*   | 2,61  |       | 3,83              |       |

|       |       |       |        |
|-------|-------|-------|--------|
| error |       | 0,63  | 1,7    |
| 2s2   | 0,02* | 0,02* | 0,0128 |
| error |       |       | 0,0044 |

#### PtNiC\_H3PO4\_140C\_Pt\_L3\_0042

| #                  | Pt-O  | Pt-Ni | Pt-Pt | R-factor filtered |
|--------------------|-------|-------|-------|-------------------|
| R [Å]              | 1,9*  | 2,608 |       | 2,705 16,51       |
| error              |       | 0,018 |       | 0,0091            |
| s [Å]              | 0,1*  | 0,1*  |       | 0,0814            |
| error (inaccurate) |       |       |       | 0,012             |
| N                  | 0*    | 2,4   |       | 4,33              |
| error              |       | 0,63  |       | 1,7               |
| 2s2                | 0,02* | 0,02* |       | 0,0132            |
| error              |       |       |       | 0,0039            |

#### PtNiC\_H3PO4\_140C\_Pt\_L3\_0043

| #                  | Pt-O  | Pt-Ni | Pt-Pt | R-factor filtered |
|--------------------|-------|-------|-------|-------------------|
| R [Å]              | 1,9*  | 2,595 |       | 2,709 16,51       |
| error              |       | 0,017 |       | 0,0096            |
| s [Å]              | 0,1*  | 0,1*  |       | 0,0695            |
| error (inaccurate) |       |       |       | 0,017             |
| N                  | 0*    | 2,95  |       | 3,08              |
| error              |       | 0,64  |       | 1,5               |
| 2s2                | 0,02* | 0,02* |       | 0,00965           |
| error              |       |       |       | 0,0045            |

#### PtNiC\_H3PO4\_140C\_Pt\_L3\_0044

| #                  | Pt-O  | Pt-Ni | Pt-Pt | R-factor filtered |
|--------------------|-------|-------|-------|-------------------|
| R [Å]              | 1,9*  | 2,615 |       | 2,699 16,51       |
| error              |       | 0,016 |       | 0,011             |
| s [Å]              | 0,1*  | 0,1*  |       | 0,0857            |
| error (inaccurate) |       |       |       | 0,015             |
| N                  | 0*    | 3     |       | 3,71              |
| error              |       | 0,6   |       | 1,8               |
| 2s2                | 0,02* | 0,02* |       | 0,0147            |
| error              |       |       |       | 0,005             |

#### PtNiC\_H3PO4\_140C\_Pt\_L3\_0045

| #                  | Pt-O  | Pt-Ni | Pt-Pt | R-factor filtered |
|--------------------|-------|-------|-------|-------------------|
| R [Å]              | 1,9*  | 2,608 |       | 2,701 16,51       |
| error              |       | 0,018 |       | 0,0099            |
| s [Å]              | 0,1*  | 0,1*  |       | 0,0818            |
| error (inaccurate) |       |       |       | 0,014             |
| N                  | 0*    | 2,59  |       | 3,92              |
| error              |       | 0,63  |       | 1,8               |
| 2s2                | 0,02* | 0,02* |       | 0,0134            |
| error              |       |       |       | 0,0044            |

## PtNiC\_H3PO4\_140C\_Pt\_L3\_0046

| #                  | Pt-O  | Pt-Ni | Pt-Pt | R-factor filtered |       |
|--------------------|-------|-------|-------|-------------------|-------|
| R [Å]              | 1,9*  | 2,602 |       | 2,706             | 16,51 |
| error              |       | 0,018 |       | 0,0098            |       |
| s [Å]              | 0,1*  | 0,1*  |       | 0,0759            |       |
| error (inaccurate) |       |       |       | 0,015             |       |
| N                  | 0*    | 2,74  |       | 3,46              |       |
| error              |       | 0,64  |       | 1,6               |       |
| 2s2                | 0,02* | 0,02* |       | 0,0115            |       |
| error              |       |       |       | 0,0045            |       |

## PtNiC\_H3PO4\_140C\_Pt\_L3\_0047

| #                  | Pt-O  | Pt-Ni | Pt-Pt | R-factor filtered |       |
|--------------------|-------|-------|-------|-------------------|-------|
| R [Å]              | 1,9*  | 2,618 |       | 2,701             | 16,51 |
| error              |       | 0,018 |       | 0,0093            |       |
| s [Å]              | 0,1*  | 0,1*  |       | 0,0769            |       |
| error (inaccurate) |       |       |       | 0,015             |       |
| N                  | 0*    | 2,78  |       | 3,55              |       |
| error              |       | 0,63  |       | 1,7               |       |
| 2s2                | 0,02* | 0,02* |       | 0,0118            |       |
| error              |       |       |       | 0,0045            |       |

## PtNiC\_H3PO4\_140C\_Pt\_L3\_0048

| #                  | Pt-O  | Pt-Ni | Pt-Pt | R-factor filtered |       |
|--------------------|-------|-------|-------|-------------------|-------|
| R [Å]              | 2*    | 2,606 |       | 2,707             | 16,51 |
| error              |       | 0,017 |       | 0,0094            |       |
| s [Å]              | 0,1*  | 0,1*  |       | 0,0799            |       |
| error (inaccurate) |       |       |       | 0,013             |       |
| N                  | 0*    | 2,58  |       | 3,96              |       |
| error              |       | 0,63  |       | 1,7               |       |
| 2s2                | 0,02* | 0,02* |       | 0,0128            |       |
| error              |       |       |       | 0,004             |       |

## PtNiC\_H3PO4\_140C\_Pt\_L3\_0049

| #                  | Pt-O  | Pt-Ni | Pt-Pt | R-factor filtered |       |
|--------------------|-------|-------|-------|-------------------|-------|
| R [Å]              | 1,9*  | 2,598 |       | 2,703             | 16,51 |
| error              |       | 0,018 |       | 0,0096            |       |
| s [Å]              | 0,1*  | 0,1*  |       | 0,0759            |       |
| error (inaccurate) |       |       |       | 0,015             |       |
| N                  | 0*    | 2,65  |       | 3,59              |       |
| error              |       | 0,64  |       | 1,7               |       |
| 2s2                | 0,02* | 0,02* |       | 0,0115            |       |
| error              |       |       |       | 0,0044            |       |

## PtNiC\_H3PO4\_140C\_Pt\_L3\_0050

| #     | Pt-O | Pt-Ni | Pt-Pt | R-factor filtered |       |
|-------|------|-------|-------|-------------------|-------|
| R [Å] | 1,9* | 2,61  |       | 2,704             | 16,51 |
| error |      | 0,017 |       | 0,01              |       |

|                    |       |       |        |
|--------------------|-------|-------|--------|
| s [Å]              | 0,1*  | 0,1*  | 0,0802 |
| error (inaccurate) |       |       | 0,015  |
| N                  | 0*    | 2,85  | 3,49   |
| error              |       | 0,63  | 1,7    |
| 2s2                | 0,02* | 0,02* | 0,0128 |
| error              |       |       | 0,0048 |

#### PtNiC\_H3PO4\_140C\_Pt\_L3\_0051

| #                  | Pt-O  | Pt-Ni | Pt-Pt | R-factor filtered |       |
|--------------------|-------|-------|-------|-------------------|-------|
| R [Å]              | 1,9*  | 2,619 |       | 2,702             | 17,42 |
| error              |       | 0,018 |       | 0,0096            |       |
| s [Å]              | 0,1*  | 0,1*  |       | 0,0823            |       |
| error (inaccurate) |       |       |       | 0,013             |       |
| N                  | 0*    | 2,61  |       | 3,97              |       |
| error              |       | 0,62  |       | 1,7               |       |
| 2s2                | 0,02* | 0,02* |       | 0,0135            |       |
| error              |       |       |       | 0,0043            |       |

#### PtNiC\_H3PO4\_140C\_Pt\_L3\_0052

| #                  | Pt-O  | Pt-Ni | Pt-Pt | R-factor filtered |       |
|--------------------|-------|-------|-------|-------------------|-------|
| R [Å]              | 1,9*  | 2,598 |       | 2,702             | 17,42 |
| error              |       | 0,018 |       | 0,0095            |       |
| s [Å]              | 0,1*  | 0,1*  |       | 0,0731            |       |
| error (inaccurate) |       |       |       | 0,015             |       |
| N                  | 0*    | 2,74  |       | 3,38              |       |
| error              |       | 0,65  |       | 1,6               |       |
| 2s2                | 0,02* | 0,02* |       | 0,0107            |       |
| error              |       |       |       | 0,0044            |       |

#### PtNiC\_H3PO4\_140C\_Pt\_L3\_0053

| #                  | Pt-O  | Pt-Ni | Pt-Pt | R-factor filtered |       |
|--------------------|-------|-------|-------|-------------------|-------|
| R [Å]              | 1,9*  | 2,614 |       | 2,707             | 17,42 |
| error              |       | 0,016 |       | 0,012             |       |
| s [Å]              | 0,1*  | 0,1*  |       | 0,0813            |       |
| error (inaccurate) |       |       |       | 0,017             |       |
| N                  | 0*    | 3,23  |       | 3,1               |       |
| error              |       | 0,62  |       | 1,7               |       |
| 2s2                | 0,02* | 0,02* |       | 0,0132            |       |
| error              |       |       |       | 0,0055            |       |

#### PtNiC\_H3PO4\_140C\_Pt\_L3\_0054

| #                  | Pt-O | Pt-Ni | Pt-Pt | R-factor filtered |       |
|--------------------|------|-------|-------|-------------------|-------|
| R [Å]              | 1,9* | 2,615 |       | 2,7               | 17,42 |
| error              |      | 0,018 |       | 0,0094            |       |
| s [Å]              | 0,1* | 0,1*  |       | 0,0795            |       |
| error (inaccurate) |      |       |       | 0,014             |       |
| N                  | 0*   | 2,68  |       | 3,81              |       |
| error              |      | 0,63  |       | 1,7               |       |

|       |       |       |        |
|-------|-------|-------|--------|
| 2s2   | 0,02* | 0,02* | 0,0126 |
| error |       |       | 0,0044 |

#### PtNiC\_H3PO4\_140C\_Pt\_L3\_0055

| #                  | Pt-O  | Pt-Ni | Pt-Pt  | R-factor filtered |
|--------------------|-------|-------|--------|-------------------|
| R [Å]              | 1,9*  | 2,611 | 2,704  | 17,42             |
| error              |       | 0,018 | 0,0097 |                   |
| s [Å]              | 0,1*  | 0,1*  | 0,0804 |                   |
| error (inaccurate) |       |       | 0,014  |                   |
| N                  | 0*    | 2,64  | 3,84   |                   |
| error              |       | 0,63  | 1,7    |                   |
| 2s2                | 0,02* | 0,02* | 0,0129 |                   |
| error              |       |       | 0,0044 |                   |

#### PtNiC\_H3PO4\_140C\_Pt\_L3\_0056

| #                  | Pt-O  | Pt-Ni | Pt-Pt  | R-factor filtered |
|--------------------|-------|-------|--------|-------------------|
| R [Å]              | 1,9*  | 2,604 | 2,706  | 17,42             |
| error              |       | 0,017 | 0,01   |                   |
| s [Å]              | 0,1*  | 0,1*  | 0,0797 |                   |
| error (inaccurate) |       |       | 0,014  |                   |
| N                  | 0*    | 2,84  | 3,62   |                   |
| error              |       | 0,63  | 1,7    |                   |
| 2s2                | 0,02* | 0,02* | 0,0127 |                   |
| error              |       |       | 0,0044 |                   |

#### PtNiC\_H3PO4\_140C\_Pt\_L3\_0057

| #                  | Pt-O  | Pt-Ni | Pt-Pt  | R-factor filtered |
|--------------------|-------|-------|--------|-------------------|
| R [Å]              | 1,9*  | 2,615 | 2,704  | 17,42             |
| error              |       | 0,016 | 0,011  |                   |
| s [Å]              | 0,1*  | 0,1*  | 0,0861 |                   |
| error (inaccurate) |       |       | 0,014  |                   |
| N                  | 0*    | 2,96  | 4      |                   |
| error              |       | 0,61  | 1,8    |                   |
| 2s2                | 0,02* | 0,02* | 0,0148 |                   |
| error              |       |       | 0,0046 |                   |

#### PtNiC\_H3PO4\_140C\_Pt\_L3\_0058

| #                  | Pt-O  | Pt-Ni | Pt-Pt  | R-factor filtered |
|--------------------|-------|-------|--------|-------------------|
| R [Å]              | 2*    | 2,607 | 2,703  | 17,42             |
| error              |       | 0,017 | 0,0093 |                   |
| s [Å]              | 0,1*  | 0,1*  | 0,0799 |                   |
| error (inaccurate) |       |       | 0,013  |                   |
| N                  | 0*    | 2,63  | 4      |                   |
| error              |       | 0,63  | 1,7    |                   |
| 2s2                | 0,02* | 0,02* | 0,0128 |                   |
| error              |       |       | 0,0042 |                   |

#### PtNiC\_H3PO4\_140C\_Pt\_L3\_0059

| #                  | Pt-O  | Pt-Ni | Pt-Pt | R-factor filtered |       |
|--------------------|-------|-------|-------|-------------------|-------|
| R [Å]              | 1,9*  | 2,604 |       | 2,705             | 17,42 |
| error              |       | 0,016 |       | 0,0096            |       |
| s [Å]              | 0,1*  | 0,1*  |       | 0,0772            |       |
| error (inaccurate) |       |       |       | 0,015             |       |
| N                  | 0*    | 3,02  |       | 3,52              |       |
| error              |       | 0,64  |       | 1,7               |       |
| 2s2                | 0,02* | 0,02* |       | 0,0119            |       |
| error              |       |       |       | 0,0044            |       |

#### PtNiC\_H3PO4\_140C\_Pt\_L3\_0060

| #                  | Pt-O  | Pt-Ni | Pt-Pt | R-factor filtered |       |
|--------------------|-------|-------|-------|-------------------|-------|
| R [Å]              | 1,9*  | 2,617 |       | 2,708             | 17,42 |
| error              |       | 0,016 |       | 0,0099            |       |
| s [Å]              | 0,1*  | 0,1*  |       | 0,0817            |       |
| error (inaccurate) |       |       |       | 0,014             |       |
| N                  | 0*    | 2,99  |       | 3,8               |       |
| error              |       | 0,62  |       | 1,7               |       |
| 2s2                | 0,02* | 0,02* |       | 0,0133            |       |
| error              |       |       |       | 0,0045            |       |

#### PtNiC\_H3PO4\_140C\_Pt\_L3\_0061

| #                  | Pt-O  | Pt-Ni | Pt-Pt | R-factor filtered |       |
|--------------------|-------|-------|-------|-------------------|-------|
| R [Å]              | 1,9*  | 2,61  |       | 2,7               | 17,06 |
| error              |       | 0,018 |       | 0,0095            |       |
| s [Å]              | 0,1*  | 0,1*  |       | 0,0855            |       |
| error (inaccurate) |       |       |       | 0,012             |       |
| N                  | 0*    | 2,53  |       | 4,54              |       |
| error              |       | 0,61  |       | 1,8               |       |
| 2s2                | 0,02* | 0,02* |       | 0,0146            |       |
| error              |       |       |       | 0,0041            |       |

#### PtNiC\_H3PO4\_140C\_Pt\_L3\_0062

| #                  | Pt-O  | Pt-Ni | Pt-Pt | R-factor filtered |       |
|--------------------|-------|-------|-------|-------------------|-------|
| R [Å]              | 1,9*  | 2,597 |       | 2,707             | 17,06 |
| error              |       | 0,009 |       | 0,0063            |       |
| s [Å]              | 0,1*  | 0,1*  |       | 0,0772            |       |
| error (inaccurate) |       |       |       | 0,014             |       |
| N                  | 0*    | 2,89  |       | 3,71              |       |
| error              |       | 0,63  |       | 1,7               |       |
| 2s2                | 0,02* | 0,02* |       | 0,0119            |       |
| error              |       |       |       | 0,0042            |       |

#### PtNiC\_H3PO4\_140C\_Pt\_L3\_0063

| #     | Pt-O | Pt-Ni | Pt-Pt | R-factor filtered |       |
|-------|------|-------|-------|-------------------|-------|
| R [Å] | 1,9* | 2,612 |       | 2,707             | 17,06 |
| error |      | 0,016 |       | 0,01              |       |
| s [Å] | 0,1* | 0,1*  |       | 0,0815            |       |

|                    |       |       |        |
|--------------------|-------|-------|--------|
| error (inaccurate) |       |       | 0,014  |
| N                  | 0*    | 3,05  | 3,73   |
| error              |       | 0,62  | 1,7    |
| 2s2                | 0,02* | 0,02* | 0,0133 |
| error              |       |       | 0,0046 |

#### PtNiC\_H3PO4\_140C\_Pt\_L3\_0064

| #                  | Pt-O  | Pt-Ni | Pt-Pt | R-factor filtered |       |
|--------------------|-------|-------|-------|-------------------|-------|
| R [Å]              | 1,9*  | 2,61  |       | 2,703             | 17,06 |
| error              |       | 0,017 |       | 0,0091            |       |
| s [Å]              | 0,1*  | 0,1*  |       | 0,0772            |       |
| error (inaccurate) |       |       |       | 0,014             |       |
| N                  | 0*    | 2,81  |       | 3,79              |       |
| error              |       | 0,64  |       | 1,7               |       |
| 2s2                | 0,02* | 0,02* |       | 0,0119            |       |
| error              |       |       |       | 0,0042            |       |

#### PtNiC\_H3PO4\_140C\_Pt\_L3\_0065

| #                  | Pt-O  | Pt-Ni | Pt-Pt | R-factor filtered |       |
|--------------------|-------|-------|-------|-------------------|-------|
| R [Å]              | 1,9*  | 2,61  |       | 2,704             | 17,06 |
| error              |       | 0,016 |       | 0,0097            |       |
| s [Å]              | 0,1*  | 0,1*  |       | 0,0794            |       |
| error (inaccurate) |       |       |       | 0,014             |       |
| N                  | 0*    |       | 3     | 3,7               |       |
| error              |       | 0,63  |       | 1,7               |       |
| 2s2                | 0,02* | 0,02* |       | 0,0126            |       |
| error              |       |       |       | 0,0045            |       |

#### PtNiC\_H3PO4\_140C\_Pt\_L3\_0066

| #                  | Pt-O  | Pt-Ni | Pt-Pt | R-factor filtered |       |
|--------------------|-------|-------|-------|-------------------|-------|
| R [Å]              | 1,9*  | 2,613 |       | 2,709             | 17,06 |
| error              |       | 0,016 |       | 0,0096            |       |
| s [Å]              | 0,1*  | 0,1*  |       | 0,0767            |       |
| error (inaccurate) |       |       |       | 0,015             |       |
| N                  | 0*    | 3,03  |       | 3,41              |       |
| error              |       | 0,64  |       | 1,6               |       |
| 2s2                | 0,02* | 0,02* |       | 0,0118            |       |
| error              |       |       |       | 0,0045            |       |

#### PtNiC\_H3PO4\_140C\_Pt\_L3\_0067

| #                  | Pt-O  | Pt-Ni | Pt-Pt | R-factor filtered |       |
|--------------------|-------|-------|-------|-------------------|-------|
| R [Å]              | 1,9*  | 2,618 |       | 2,705             | 17,06 |
| error              |       | 0,017 |       | 0,009             |       |
| s [Å]              | 0,1*  | 0,1*  |       | 0,0799            |       |
| error (inaccurate) |       |       |       | 0,013             |       |
| N                  | 0*    | 2,84  |       | 4,01              |       |
| error              |       | 0,62  |       | 1,7               |       |
| 2s2                | 0,02* | 0,02* |       | 0,0128            |       |



error 0,0042

PtNiC\_H3PO4\_140C\_Pt\_L3\_0068

| #                  | Pt-O  | Pt-Ni | Pt-Pt | R-factor filtered |       |
|--------------------|-------|-------|-------|-------------------|-------|
| R [Å]              | 2*    | 2,607 |       | 2,701             | 17,06 |
| error              |       | 0,018 |       | 0,0089            |       |
| s [Å]              | 0,1*  | 0,1*  |       | 0,077             |       |
| error (inaccurate) |       |       |       | 0,013             |       |
| N                  | 0*    | 2,67  |       | 3,86              |       |
| error              |       | 0,64  |       | 1,7               |       |
| 2s2                | 0,02* | 0,02* |       | 0,0119            |       |
| error              |       |       |       | 0,004             |       |

PtNiC\_H3PO4\_140C\_Pt\_L3\_0069

| #                  | Pt-O  | Pt-Ni | Pt-Pt | R-factor filtered |       |
|--------------------|-------|-------|-------|-------------------|-------|
| R [Å]              | 1,9*  | 2,619 |       | 2,703             | 17,06 |
| error              |       | 0,016 |       | 0,01              |       |
| s [Å]              | 0,1*  | 0,1*  |       | 0,0846            |       |
| error (inaccurate) |       |       |       | 0,014             |       |
| N                  | 0*    | 3,07  |       | 3,89              |       |
| error              |       | 0,61  |       | 1,8               |       |
| 2s2                | 0,02* | 0,02* |       | 0,0143            |       |
| error              |       |       |       | 0,0047            |       |

PtNiC\_H3PO4\_140C\_Pt\_L3\_0070

| #                  | Pt-O  | Pt-Ni | Pt-Pt | R-factor filtered |       |
|--------------------|-------|-------|-------|-------------------|-------|
| R [Å]              | 1,9*  | 2,625 |       | 2,705             | 17,06 |
| error              |       | 0,016 |       | 0,0096            |       |
| s [Å]              | 0,1*  | 0,1*  |       | 0,0829            |       |
| error (inaccurate) |       |       |       | 0,013             |       |
| N                  | 0*    |       | 3     | 3,98              |       |
| error              |       | 0,61  |       | 1,7               |       |
| 2s2                | 0,02* | 0,02* |       | 0,0137            |       |
| error              |       |       |       | 0,0044            |       |

PtNiC\_H3PO4\_140C\_Pt\_L3\_0071

| #                  | Pt-O  | Pt-Ni | Pt-Pt | R-factor filtered |       |
|--------------------|-------|-------|-------|-------------------|-------|
| R [Å]              | 1,9*  | 2,616 |       | 2,701             | 16,64 |
| error              |       | 0,018 |       | 0,009             |       |
| s [Å]              | 0,1*  | 0,1*  |       | 0,0795            |       |
| error (inaccurate) |       |       |       | 0,013             |       |
| N                  | 0*    | 2,68  |       | 4                 |       |
| error              |       | 0,63  |       | 1,7               |       |
| 2s2                | 0,02* | 0,02* |       | 0,0126            |       |
| error              |       |       |       | 0,0041            |       |

PtNiC\_H3PO4\_140C\_Pt\_L3\_0072

| # | Pt-O | Pt-Ni | Pt-Pt | R-factor filtered |  |
|---|------|-------|-------|-------------------|--|
|---|------|-------|-------|-------------------|--|

|                    |       |        |        |       |
|--------------------|-------|--------|--------|-------|
| R [Å]              | 1,9*  | 2,611  | 2,706  | 16,64 |
| error              |       | 0,0092 | 0,0073 |       |
| s [Å]              | 0,1*  | 0,1*   | 0,0783 |       |
| error (inaccurate) |       |        | 0,015  |       |
| N                  | 0*    | 3,05   | 3,43   |       |
| error              |       | 0,62   | 1,7    |       |
| 2s2                | 0,02* | 0,02*  | 0,0123 |       |
| error              |       |        | 0,0047 |       |

#### PtNiC\_H3PO4\_140C\_Pt\_L3\_0073

| #                  | Pt-O  | Pt-Ni | Pt-Pt | R-factor filtered |       |
|--------------------|-------|-------|-------|-------------------|-------|
| R [Å]              | 1,9*  | 2,623 |       | 2,7               | 16,64 |
| error              |       | 0,016 |       | 0,0099            |       |
| s [Å]              | 0,1*  | 0,1*  |       | 0,0827            |       |
| error (inaccurate) |       |       |       | 0,014             |       |
| N                  | 0*    | 3,02  |       | 3,81              |       |
| error              |       | 0,61  |       | 1,7               |       |
| 2s2                | 0,02* | 0,02* |       | 0,0137            |       |
| error              |       |       |       | 0,0046            |       |

#### PtNiC\_H3PO4\_140C\_Pt\_L3\_0074

| #                  | Pt-O  | Pt-Ni | Pt-Pt | R-factor filtered |       |
|--------------------|-------|-------|-------|-------------------|-------|
| R [Å]              | 1,9*  | 2,607 |       | 2,705             | 16,64 |
| error              |       | 0,017 |       | 0,0094            |       |
| s [Å]              | 0,1*  | 0,1*  |       | 0,0802            |       |
| error (inaccurate) |       |       |       | 0,013             |       |
| N                  | 0*    | 2,69  |       | 4                 |       |
| error              |       | 0,63  |       | 1,7               |       |
| 2s2                | 0,02* | 0,02* |       | 0,0129            |       |
| error              |       |       |       | 0,004             |       |

#### PtNiC\_H3PO4\_140C\_Pt\_L3\_0075

| #                  | Pt-O  | Pt-Ni | Pt-Pt | R-factor filtered |       |
|--------------------|-------|-------|-------|-------------------|-------|
| R [Å]              | 1,9*  | 2,615 |       | 2,704             | 16,64 |
| error              |       | 0,017 |       | 0,0093            |       |
| s [Å]              | 0,1*  | 0,1*  |       | 0,0778            |       |
| error (inaccurate) |       |       |       | 0,014             |       |
| N                  | 0*    | 2,85  |       | 3,59              |       |
| error              |       | 0,63  |       | 1,6               |       |
| 2s2                | 0,02* | 0,02* |       | 0,0121            |       |
| error              |       |       |       | 0,0043            |       |

#### PtNiC\_H3PO4\_140C\_Pt\_L3\_0076

| #                  | Pt-O | Pt-Ni | Pt-Pt | R-factor filtered |       |
|--------------------|------|-------|-------|-------------------|-------|
| R [Å]              | 1,9* | 2,616 |       | 2,705             | 16,64 |
| error              |      | 0,016 |       | 0,0096            |       |
| s [Å]              | 0,1* | 0,1*  |       | 0,0772            |       |
| error (inaccurate) |      |       |       | 0,015             |       |

|       |       |       |        |
|-------|-------|-------|--------|
| N     | 0*    | 3,01  | 3,43   |
| error |       | 0,63  | 1,6    |
| 2s2   | 0,02* | 0,02* | 0,0119 |
| error |       |       | 0,0046 |

#### PtNiC\_H3PO4\_140C\_Pt\_L3\_0077

| #                  | Pt-O  | Pt-Ni | Pt-Pt | R-factor filtered |       |
|--------------------|-------|-------|-------|-------------------|-------|
| R [Å]              | 1,9*  | 2,61  |       | 2,704             | 16,64 |
| error              |       | 0,018 |       | 0,0089            |       |
| s [Å]              | 0,1*  | 0,1*  |       | 0,0745            |       |
| error (inaccurate) |       |       |       | 0,014             |       |
| N                  | 0*    | 2,69  |       | 3,59              |       |
| error              |       | 0,64  |       | 1,6               |       |
| 2s2                | 0,02* | 0,02* |       | 0,0111            |       |
| error              |       |       |       | 0,0042            |       |

#### PtNiC\_H3PO4\_140C\_Pt\_L3\_0078

| #                  | Pt-O  | Pt-Ni | Pt-Pt | R-factor filtered |       |
|--------------------|-------|-------|-------|-------------------|-------|
| R [Å]              | 2*    | 2,61  |       | 2,707             | 16,64 |
| error              |       | 0,017 |       | 0,01              |       |
| s [Å]              | 0,1*  | 0,1*  |       | 0,0844            |       |
| error (inaccurate) |       |       |       | 0,013             |       |
| N                  | 0*    | 2,68  |       | 4,21              |       |
| error              |       | 0,62  |       | 1,8               |       |
| 2s2                | 0,02* | 0,02* |       | 0,0142            |       |
| error              |       |       |       | 0,0043            |       |

#### PtNiC\_H3PO4\_140C\_Pt\_L3\_0079

| #                  | Pt-O  | Pt-Ni | Pt-Pt | R-factor filtered |       |
|--------------------|-------|-------|-------|-------------------|-------|
| R [Å]              | 1,9*  | 2,619 |       | 2,704             | 16,64 |
| error              |       | 0,017 |       | 0,0099            |       |
| s [Å]              | 0,1*  | 0,1*  |       | 0,0805            |       |
| error (inaccurate) |       |       |       | 0,015             |       |
| N                  | 0*    | 2,95  |       | 3,62              |       |
| error              |       | 0,62  |       | 1,7               |       |
| 2s2                | 0,02* | 0,02* |       | 0,013             |       |
| error              |       |       |       | 0,0046            |       |

$$S02 = 0,92457225$$

| Sample                      | Time (min) |
|-----------------------------|------------|
| PtNiC_dry_Pt_L3             | 0          |
| PtNiC_dry_180C_Pt_L3        | 0          |
| PtNiC_H3PO4_180C_Pt_L3_0000 | 3          |
| PtNiC_H3PO4_180C_Pt_L3_0001 | 6          |
| PtNiC_H3PO4_180C_Pt_L3_0002 | 9          |
| PtNiC_H3PO4_180C_Pt_L3_0003 | 12         |
| PtNiC_H3PO4_180C_Pt_L3_0004 | 15         |
| PtNiC_H3PO4_180C_Pt_L3_0005 | 18         |
| PtNiC_H3PO4_180C_Pt_L3_0006 | 21         |
| PtNiC_H3PO4_180C_Pt_L3_0007 | 24         |
| PtNiC_H3PO4_180C_Pt_L3_0008 | 27         |
| PtNiC_H3PO4_180C_Pt_L3_0009 | 30         |
| PtNiC_H3PO4_180C_Pt_L3_0010 | 33         |
| PtNiC_H3PO4_180C_Pt_L3_0011 | 36         |
| PtNiC_H3PO4_180C_Pt_L3_0012 | 39         |
| PtNiC_H3PO4_180C_Pt_L3_0013 | 42         |
| PtNiC_H3PO4_180C_Pt_L3_0014 | 45         |
| PtNiC_H3PO4_180C_Pt_L3_0015 | 48         |
| PtNiC_H3PO4_180C_Pt_L3_0016 | 51         |
| PtNiC_H3PO4_180C_Pt_L3_0017 | 54         |
| PtNiC_H3PO4_180C_Pt_L3_0018 | 57         |
| PtNiC_H3PO4_180C_Pt_L3_0019 | 60         |
| PtNiC_H3PO4_180C_Pt_L3_0020 | 63         |
| PtNiC_H3PO4_180C_Pt_L3_0021 | 66         |
| PtNiC_H3PO4_180C_Pt_L3_0022 | 69         |
| PtNiC_H3PO4_180C_Pt_L3_0023 | 72         |
| PtNiC_H3PO4_180C_Pt_L3_0024 | 75         |
| PtNiC_H3PO4_180C_Pt_L3_0025 | 78         |
| PtNiC_H3PO4_180C_Pt_L3_0026 | 81         |
| PtNiC_H3PO4_180C_Pt_L3_0027 | 84         |
| PtNiC_H3PO4_180C_Pt_L3_0028 | 87         |
| PtNiC_H3PO4_180C_Pt_L3_0029 | 90         |
| PtNiC_H3PO4_180C_Pt_L3_0030 | 93         |
| PtNiC_H3PO4_180C_Pt_L3_0031 | 96         |
| PtNiC_H3PO4_180C_Pt_L3_0032 | 99         |
| PtNiC_H3PO4_180C_Pt_L3_0033 | 102        |
| PtNiC_H3PO4_180C_Pt_L3_0034 | 105        |
| PtNiC_H3PO4_180C_Pt_L3_0035 | 108        |
| PtNiC_H3PO4_180C_Pt_L3_0036 | 111        |
| PtNiC_H3PO4_180C_Pt_L3_0037 | 114        |
| PtNiC_H3PO4_180C_Pt_L3_0038 | 117        |
| PtNiC_H3PO4_180C_Pt_L3_0039 | 120        |
| PtNiC_H3PO4_180C_Pt_L3_0040 | 123        |
| PtNiC_H3PO4_180C_Pt_L3_0041 | 126        |
| PtNiC_H3PO4_180C_Pt_L3_0042 | 129        |
| PtNiC_H3PO4_180C_Pt_L3_0043 | 132        |

|                             |       |
|-----------------------------|-------|
| PtNiC_H3PO4_180C_Pt_L3_0044 | 135   |
| PtNiC_H3PO4_180C_Pt_L3_0045 | 138   |
| PtNiC_H3PO4_180C_Pt_L3_0046 | 141   |
| PtNiC_H3PO4_180C_Pt_L3_0047 | 144   |
| PtNiC_H3PO4_180C_Pt_L3_0048 | 147   |
| PtNiC_H3PO4_180C_Pt_L3_0049 | 150   |
| PtNiC_H3PO4_180C_Pt_L3_0050 | 153   |
| PtNiC_H3PO4_180C_Pt_L3_0051 | 156   |
| PtNiC_H3PO4_180C_Pt_L3_0052 | 159   |
| PtNiC_H3PO4_180C_Pt_L3_0053 | 162   |
| PtNiC_H3PO4_180C_Pt_L3_0054 | 165   |
| PtNiC_H3PO4_180C_Pt_L3_0055 | 168   |
| PtNiC_H3PO4_180C_Pt_L3_0056 | 171   |
| PtNiC_H3PO4_180C_Pt_L3_0057 | 174   |
| PtNiC_H3PO4_180C_Pt_L3_0058 | 177   |
| PtNiC_H3PO4_180C_Pt_L3_0059 | 180   |
| PtNiC_H3PO4_180C_Pt_L3_0060 | 183   |
| PtNiC_H3PO4_180C_Pt_L3_0061 | 186   |
| PtNiC_H3PO4_180C_Pt_L3_0062 | 189   |
| PtNiC_H3PO4_180C_Pt_L3_0063 | 192   |
| PtNiC_H3PO4_180C_Pt_L3_0064 | 195   |
| PtNiC_H3PO4_180C_Pt_L3_0065 | 198   |
| PtNiC_H3PO4_180C_Pt_L3_0066 | 201   |
| PtNiC_H3PO4_180C_Pt_L3_0067 | 204   |
|                             | 0 207 |
|                             | 0 210 |
| PtNiC_H3PO4_180C_Pt_L3_0070 | 213   |
| PtNiC_H3PO4_180C_Pt_L3_0071 | 216   |
| PtNiC_H3PO4_180C_Pt_L3_0072 | 219   |
| PtNiC_H3PO4_180C_Pt_L3_0073 | 222   |
| PtNiC_H3PO4_180C_Pt_L3_0074 | 225   |
| PtNiC_H3PO4_180C_Pt_L3_0075 | 228   |
| PtNiC_H3PO4_180C_Pt_L3_0076 | 231   |
| PtNiC_H3PO4_180C_Pt_L3_0077 | 234   |
| PtNiC_H3PO4_180C_Pt_L3_0078 | 237   |
| PtNiC_H3PO4_180C_Pt_L3_0079 | 240   |

## PtNiC\_dry\_Pt\_L3

S02 = 0,92457225

| #                  | Pt-O  | Pt-Ni | Pt-Pt | R-factor filtered |       |
|--------------------|-------|-------|-------|-------------------|-------|
| R [Å]              | 2,001 | 2,62  |       | 2,693             | 15,57 |
| error              | 0,028 | 0,015 |       | 0,01              |       |
| s [Å]              | 0,1*  | 0,1*  |       | 0,0751            |       |
| error (inaccurate) |       |       |       | 0,019             |       |
| N                  | 1,81  | 3,07  |       | 2,68              |       |
| error              | 0,41  | 0,61  |       | 1,6               |       |
| 2s2                | 0,02* | 0,02* |       | 0,0113            |       |
| error              |       |       |       | 0,0055            |       |

## PtNiC\_dry\_180C\_Pt\_L3

| #                  | Pt-O  | Pt-Ni | Pt-Pt | R-factor filtered |       |
|--------------------|-------|-------|-------|-------------------|-------|
| R [Å]              | 1,996 | 2,61  |       | 2,696             | 15,57 |
| error              | 0,03  | 0,016 |       | 0,014             |       |
| s [Å]              | 0,1*  | 0,1*  |       | 0,0858            |       |
| error (inaccurate) |       |       |       | 0,02              |       |
| N                  | 1,65  | 2,55  |       | 2,71              |       |
| error              | 0,41  | 0,6   |       | 1,8               |       |
| 2s2                | 0,02* | 0,02* |       | 0,0147            |       |
| error              |       |       |       | 0,0067            |       |

## PtNiC\_H3PO4\_180C\_Pt\_L3\_0000

| #                  | Pt-O  | Pt-Ni | Pt-Pt | R-factor filtered |       |
|--------------------|-------|-------|-------|-------------------|-------|
| R [Å]              | 1,918 | 2,608 |       | 2,704             | 15,57 |
| error              | 0,048 | 0,018 |       | 0,01              |       |
| s [Å]              | 0,1*  | 0,1*  |       | 0,0826            |       |
| error (inaccurate) |       |       |       | 0,014             |       |
| N                  | 0,822 | 2,58  |       | 3,87              |       |
| error              | 0,39  | 0,64  |       | 1,8               |       |
| 2s2                | 0,02* | 0,02* |       | 0,0136            |       |
| error              |       |       |       | 0,0046            |       |

## PtNiC\_H3PO4\_180C\_Pt\_L3\_0001

| #                  | Pt-O  | Pt-Ni | Pt-Pt | R-factor filtered |       |
|--------------------|-------|-------|-------|-------------------|-------|
| R [Å]              | 1,9*  | 2,607 |       | 2,699             | 15,57 |
| error              |       | 0,018 |       | 0,01              |       |
| s [Å]              | 0,1*  | 0,1*  |       | 0,0759            |       |
| error (inaccurate) |       |       |       | 0,016             |       |
| N                  | 0*    | 2,66  |       | 3,26              |       |
| error              |       | 0,64  |       | 1,6               |       |
| 2s2                | 0,02* | 0,02* |       | 0,0115            |       |
| error              |       |       |       | 0,0048            |       |

## PtNiC\_H3PO4\_180C\_Pt\_L3\_0002

| #     | Pt-O | Pt-Ni | Pt-Pt | R-factor filtered |       |
|-------|------|-------|-------|-------------------|-------|
| R [Å] | 1,9* | 2,623 |       | 2,699             | 15,57 |
| error |      | 0,02  |       | 0,0098            |       |

|                    |       |       |        |
|--------------------|-------|-------|--------|
| s [Å]              | 0,1*  | 0,1*  | 0,0825 |
| error (inaccurate) |       |       | 0,013  |
| N                  | 0*    | 2,42  | 3,99   |
| error              |       | 0,61  | 1,8    |
| 2s2                | 0,02* | 0,02* | 0,0136 |
| error              |       |       | 0,0044 |

#### PtNiC\_H3PO4\_180C\_Pt\_L3\_0003

| #                  | Pt-O  | Pt-Ni | Pt-Pt | R-factor filtered |       |
|--------------------|-------|-------|-------|-------------------|-------|
| R [Å]              | 1,9*  | 2,611 |       | 2,701             | 15,57 |
| error              |       | 0,019 |       | 0,0093            |       |
| s [Å]              | 0,1*  | 0,1*  |       | 0,077             |       |
| error (inaccurate) |       |       |       | 0,014             |       |
| N                  | 0*    | 2,4   |       | 3,68              |       |
| error              |       | 0,64  |       | 1,7               |       |
| 2s2                | 0,02* | 0,02* |       | 0,0118            |       |
| error              |       |       |       | 0,0043            |       |

#### PtNiC\_H3PO4\_180C\_Pt\_L3\_0004

| #                  | Pt-O  | Pt-Ni | Pt-Pt | R-factor filtered |       |
|--------------------|-------|-------|-------|-------------------|-------|
| R [Å]              | 1,9*  | 2,615 |       | 2,702             | 15,57 |
| error              |       | 0,019 |       | 0,01              |       |
| s [Å]              | 0,1*  | 0,1*  |       | 0,0848            |       |
| error (inaccurate) |       |       |       | 0,013             |       |
| N                  | 0*    | 2,41  |       | 4,08              |       |
| error              |       | 0,62  |       | 1,8               |       |
| 2s2                | 0,02* | 0,02* |       | 0,0144            |       |
| error              |       |       |       | 0,0045            |       |

#### PtNiC\_H3PO4\_180C\_Pt\_L3\_0005

| #                  | Pt-O  | Pt-Ni | Pt-Pt | R-factor filtered |       |
|--------------------|-------|-------|-------|-------------------|-------|
| R [Å]              | 1,9*  | 2,611 |       | 2,702             | 15,57 |
| error              |       | 0,019 |       | 0,0092            |       |
| s [Å]              | 0,1*  | 0,1*  |       | 0,0795            |       |
| error (inaccurate) |       |       |       | 0,013             |       |
| N                  | 0*    | 2,39  |       | 4,04              |       |
| error              |       | 0,64  |       | 1,7               |       |
| 2s2                | 0,02* | 0,02* |       | 0,0126            |       |
| error              |       |       |       | 0,0041            |       |

#### PtNiC\_H3PO4\_180C\_Pt\_L3\_0006

| #                  | Pt-O | Pt-Ni | Pt-Pt | R-factor filtered |       |
|--------------------|------|-------|-------|-------------------|-------|
| R [Å]              | 1,9* | 2,604 |       | 2,708             | 15,57 |
| error              |      | 0,018 |       | 0,01              |       |
| s [Å]              | 0,1* | 0,1*  |       | 0,0815            |       |
| error (inaccurate) |      |       |       | 0,014             |       |
| N                  | 0*   | 2,5   |       | 3,93              |       |
| error              |      | 0,63  |       | 1,8               |       |



|       |       |       |        |
|-------|-------|-------|--------|
| 2s2   | 0,02* | 0,02* | 0,0133 |
| error |       |       | 0,0044 |

#### PtNiC\_H3PO4\_180C\_Pt\_L3\_0007

| #                  | Pt-O  | Pt-Ni | Pt-Pt | R-factor filtered |
|--------------------|-------|-------|-------|-------------------|
| R [Å]              | 2*    | 2,623 |       | 2,702 15,57       |
| error              |       | 0,017 |       | 0,01              |
| s [Å]              | 0,1*  | 0,1*  |       | 0,0844            |
| error (inaccurate) |       |       |       | 0,014             |
| N                  | 0*    | 2,77  |       | 3,85              |
| error              |       | 0,61  |       | 1,8               |
| 2s2                | 0,02* | 0,02* |       | 0,0142            |
| error              |       |       |       | 0,0045            |

#### PtNiC\_H3PO4\_180C\_Pt\_L3\_0008

| #                  | Pt-O  | Pt-Ni | Pt-Pt | R-factor filtered |
|--------------------|-------|-------|-------|-------------------|
| R [Å]              | 1,9*  | 2,613 |       | 2,7 15,57         |
| error              |       | 0,018 |       | 0,011             |
| s [Å]              | 0,1*  | 0,1*  |       | 0,0852            |
| error (inaccurate) |       |       |       | 0,014             |
| N                  | 0*    | 2,54  |       | 3,91              |
| error              |       | 0,61  |       | 1,8               |
| 2s2                | 0,02* | 0,02* |       | 0,0145            |
| error              |       |       |       | 0,0047            |

#### PtNiC\_H3PO4\_180C\_Pt\_L3\_0009

| #                  | Pt-O  | Pt-Ni | Pt-Pt | R-factor filtered |
|--------------------|-------|-------|-------|-------------------|
| R [Å]              | 1,9*  | 2,607 |       | 2,703 15,57       |
| error              |       | 0,019 |       | 0,01              |
| s [Å]              | 0,1*  | 0,1*  |       | 0,0838            |
| error (inaccurate) |       |       |       | 0,014             |
| N                  | 0*    | 2,38  |       | 4,01              |
| error              |       | 0,62  |       | 1,8               |
| 2s2                | 0,02* | 0,02* |       | 0,014             |
| error              |       |       |       | 0,0045            |

#### PtNiC\_H3PO4\_180C\_Pt\_L3\_0010

| #                  | Pt-O  | Pt-Ni | Pt-Pt | R-factor filtered |
|--------------------|-------|-------|-------|-------------------|
| R [Å]              | 2*    | 2,603 |       | 2,696 15,57       |
| error              |       | 0,023 |       | 0,0089            |
| s [Å]              | 0,1*  | 0,1*  |       | 0,0651            |
| error (inaccurate) |       |       |       | 0,017             |
| N                  | 0*    | 2,08  |       | 3,09              |
| error              |       | 0,67  |       | 1,4               |
| 2s2                | 0,02* | 0,02* |       | 0,00847           |
| error              |       |       |       | 0,0042            |

#### PtNiC\_H3PO4\_180C\_Pt\_L3\_0011

| #                  | Pt-O  | Pt-Ni | Pt-Pt | R-factor filtered |       |
|--------------------|-------|-------|-------|-------------------|-------|
| R [Å]              | 1,9*  | 2,599 |       | 2,7               | 16,31 |
| error              |       | 0,02  |       | 0,01              |       |
| s [Å]              | 0,1*  | 0,1*  |       | 0,0799            |       |
| error (inaccurate) |       |       |       | 0,014             |       |
| N                  | 0*    | 2,27  |       | 3,77              |       |
| error              |       | 0,63  |       | 1,7               |       |
| 2s2                | 0,02* | 0,02* |       | 0,0128            |       |
| error              |       |       |       | 0,0044            |       |

#### PtNiC\_H3PO4\_180C\_Pt\_L3\_0012

| #                  | Pt-O  | Pt-Ni | Pt-Pt | R-factor filtered |       |
|--------------------|-------|-------|-------|-------------------|-------|
| R [Å]              | 1,9*  | 2,603 |       | 2,698             | 16,31 |
| error              |       | 0,02  |       | 0,011             |       |
| s [Å]              | 0,1*  | 0,1*  |       | 0,0871            |       |
| error (inaccurate) |       |       |       | 0,013             |       |
| N                  | 0*    | 2,15  |       | 4,25              |       |
| error              |       | 0,61  |       | 1,9               |       |
| 2s2                | 0,02* | 0,02* |       | 0,0152            |       |
| error              |       |       |       | 0,0045            |       |

#### PtNiC\_H3PO4\_180C\_Pt\_L3\_0013

| #                  | Pt-O  | Pt-Ni | Pt-Pt | R-factor filtered |       |
|--------------------|-------|-------|-------|-------------------|-------|
| R [Å]              | 1,9*  | 2,619 |       | 2,705             | 16,31 |
| error              |       | 0,019 |       | 0,0097            |       |
| s [Å]              | 0,1*  | 0,1*  |       | 0,0849            |       |
| error (inaccurate) |       |       |       | 0,012             |       |
| N                  | 0*    | 2,3   |       | 4,34              |       |
| error              |       | 0,61  |       | 1,8               |       |
| 2s2                | 0,02* | 0,02* |       | 0,0144            |       |
| error              |       |       |       | 0,0041            |       |

#### PtNiC\_H3PO4\_180C\_Pt\_L3\_0014

| #                  | Pt-O  | Pt-Ni | Pt-Pt | R-factor filtered |       |
|--------------------|-------|-------|-------|-------------------|-------|
| R [Å]              | 1,9*  | 2,615 |       | 2,698             | 16,31 |
| error              |       | 0,018 |       | 0,0094            |       |
| s [Å]              | 0,1*  | 0,1*  |       | 0,0805            |       |
| error (inaccurate) |       |       |       | 0,013             |       |
| N                  | 0*    | 2,52  |       | 3,87              |       |
| error              |       | 0,62  |       | 1,7               |       |
| 2s2                | 0,02* | 0,02* |       | 0,013             |       |
| error              |       |       |       | 0,0042            |       |

#### PtNiC\_H3PO4\_180C\_Pt\_L3\_0015

| #     | Pt-O | Pt-Ni | Pt-Pt | R-factor filtered |       |
|-------|------|-------|-------|-------------------|-------|
| R [Å] | 1,9* | 2,614 |       | 2,705             | 16,31 |
| error |      | 0,017 |       | 0,011             |       |
| s [Å] | 0,1* | 0,1*  |       | 0,0878            |       |

|                    |       |       |        |
|--------------------|-------|-------|--------|
| error (inaccurate) |       |       | 0,013  |
| N                  | 0*    | 2,72  | 4,18   |
| error              |       | 0,61  | 1,9    |
| 2s2                | 0,02* | 0,02* | 0,0154 |
| error              |       |       | 0,0047 |

#### PtNiC\_H3PO4\_180C\_Pt\_L3\_0016

| #                  | Pt-O  | Pt-Ni | Pt-Pt  | R-factor filtered |
|--------------------|-------|-------|--------|-------------------|
| R [Å]              | 1,9*  | 2,616 | 2,706  | 16,31             |
| error              |       | 0,018 | 0,01   |                   |
| s [Å]              | 0,1*  | 0,1*  | 0,0855 |                   |
| error (inaccurate) |       |       | 0,013  |                   |
| N                  | 0*    | 2,47  | 4,28   |                   |
| error              |       | 0,62  | 1,8    |                   |
| 2s2                | 0,02* | 0,02* | 0,0146 |                   |
| error              |       |       | 0,0044 |                   |

#### PtNiC\_H3PO4\_180C\_Pt\_L3\_0017

| #                  | Pt-O  | Pt-Ni | Pt-Pt  | R-factor filtered |
|--------------------|-------|-------|--------|-------------------|
| R [Å]              | 1,9*  | 2,615 | 2,699  | 16,31             |
| error              |       | 0,019 | 0,0097 |                   |
| s [Å]              | 0,1*  | 0,1*  | 0,0829 |                   |
| error (inaccurate) |       |       | 0,013  |                   |
| N                  | 0*    | 2,39  | 4,12   |                   |
| error              |       | 0,62  | 1,8    |                   |
| 2s2                | 0,02* | 0,02* | 0,0137 |                   |
| error              |       |       | 0,0043 |                   |

#### PtNiC\_H3PO4\_180C\_Pt\_L3\_0018

| #                  | Pt-O  | Pt-Ni | Pt-Pt  | R-factor filtered |
|--------------------|-------|-------|--------|-------------------|
| R [Å]              | 2*    | 2,622 | 2,709  | 16,31             |
| error              |       | 0,017 | 0,01   |                   |
| s [Å]              | 0,1*  | 0,1*  | 0,0819 |                   |
| error (inaccurate) |       |       | 0,014  |                   |
| N                  | 0*    | 2,72  | 3,73   |                   |
| error              |       | 0,62  | 1,7    |                   |
| 2s2                | 0,02* | 0,02* | 0,0134 |                   |
| error              |       |       | 0,0046 |                   |

#### PtNiC\_H3PO4\_180C\_Pt\_L3\_0019

| #                  | Pt-O  | Pt-Ni | Pt-Pt  | R-factor filtered |
|--------------------|-------|-------|--------|-------------------|
| R [Å]              | 1,9*  | 2,615 | 2,702  | 16,31             |
| error              |       | 0,018 | 0,011  |                   |
| s [Å]              | 0,1*  | 0,1*  | 0,0862 |                   |
| error (inaccurate) |       |       | 0,014  |                   |
| N                  | 0*    | 2,58  | 3,99   |                   |
| error              |       | 0,61  | 1,8    |                   |
| 2s2                | 0,02* | 0,02* | 0,0149 |                   |

error 0,0047

PtNiC\_H3PO4\_180C\_Pt\_L3\_0020

| #                  | Pt-O  | Pt-Ni | Pt-Pt | R-factor filtered |       |
|--------------------|-------|-------|-------|-------------------|-------|
| R [Å]              | 1,9*  | 2,624 |       | 2,703             | 16,31 |
| error              |       | 0,018 |       | 0,0099            |       |
| s [Å]              | 0,1*  | 0,1*  |       | 0,086             |       |
| error (inaccurate) |       |       |       | 0,012             |       |
| N                  | 0*    | 2,46  |       | 4,29              |       |
| error              |       | 0,6   |       | 1,8               |       |
| 2s2                | 0,02* | 0,02* |       | 0,0148            |       |
| error              |       |       |       | 0,0042            |       |

PtNiC\_H3PO4\_180C\_Pt\_L3\_0021

| #                  | Pt-O  | Pt-Ni | Pt-Pt | R-factor filtered |       |
|--------------------|-------|-------|-------|-------------------|-------|
| R [Å]              | 1,9*  | 2,612 |       | 2,702             | 15,36 |
| error              |       | 0,019 |       | 0,0091            |       |
| s [Å]              | 0,1*  | 0,1*  |       | 0,0783            |       |
| error (inaccurate) |       |       |       | 0,013             |       |
| N                  | 0*    | 2,36  |       | 3,89              |       |
| error              |       | 0,63  |       | 1,7               |       |
| 2s2                | 0,02* | 0,02* |       | 0,0123            |       |
| error              |       |       |       | 0,004             |       |

PtNiC\_H3PO4\_180C\_Pt\_L3\_0022

| #                  | Pt-O  | Pt-Ni | Pt-Pt | R-factor filtered |       |
|--------------------|-------|-------|-------|-------------------|-------|
| R [Å]              | 1,9*  | 2,623 |       | 2,702             | 15,36 |
| error              |       | 0,019 |       | 0,0092            |       |
| s [Å]              | 0,1*  | 0,1*  |       | 0,0806            |       |
| error (inaccurate) |       |       |       | 0,013             |       |
| N                  | 0*    | 2,43  |       | 4,03              |       |
| error              |       | 0,62  |       | 1,7               |       |
| 2s2                | 0,02* | 0,02* |       | 0,013             |       |
| error              |       |       |       | 0,0042            |       |

PtNiC\_H3PO4\_180C\_Pt\_L3\_0023

| #                  | Pt-O  | Pt-Ni | Pt-Pt | R-factor filtered |       |
|--------------------|-------|-------|-------|-------------------|-------|
| R [Å]              | 1,9*  | 2,609 |       | 2,704             | 15,36 |
| error              |       | 0,02  |       | 0,009             |       |
| s [Å]              | 0,1*  | 0,1*  |       | 0,0808            |       |
| error (inaccurate) |       |       |       | 0,012             |       |
| N                  | 0*    | 2,16  |       | 4,32              |       |
| error              |       | 0,63  |       | 1,7               |       |
| 2s2                | 0,02* | 0,02* |       | 0,0131            |       |
| error              |       |       |       | 0,0039            |       |

PtNiC\_H3PO4\_180C\_Pt\_L3\_0024

| # | Pt-O | Pt-Ni | Pt-Pt | R-factor filtered |  |
|---|------|-------|-------|-------------------|--|
|---|------|-------|-------|-------------------|--|

|                    |       |       |        |       |
|--------------------|-------|-------|--------|-------|
| R [Å]              | 1,9*  | 2,606 | 2,706  | 15,36 |
| error              |       | 0,019 | 0,0093 |       |
| s [Å]              | 0,1*  | 0,1*  | 0,079  |       |
| error (inaccurate) |       |       | 0,013  |       |
| N                  | 0*    | 2,34  | 4      |       |
| error              |       | 0,63  | 1,7    |       |
| 2s2                | 0,02* | 0,02* | 0,0125 |       |
| error              |       |       | 0,004  |       |

#### PtNiC\_H3PO4\_180C\_Pt\_L3\_0025

| #                  | Pt-O  | Pt-Ni | Pt-Pt | R-factor filtered |       |
|--------------------|-------|-------|-------|-------------------|-------|
| R [Å]              | 1,9*  | 2,613 |       | 2,705             | 15,36 |
| error              |       | 0,018 |       | 0,01              |       |
| s [Å]              | 0,1*  | 0,1*  |       | 0,08              |       |
| error (inaccurate) |       |       |       | 0,015             |       |
| N                  | 0*    | 2,6   |       | 3,65              |       |
| error              |       | 0,63  |       | 1,7               |       |
| 2s2                | 0,02* | 0,02* |       | 0,0128            |       |
| error              |       |       |       | 0,0046            |       |

#### PtNiC\_H3PO4\_180C\_Pt\_L3\_0026

| #                  | Pt-O  | Pt-Ni | Pt-Pt | R-factor filtered |       |
|--------------------|-------|-------|-------|-------------------|-------|
| R [Å]              | 1,9*  | 2,621 |       | 2,704             | 15,36 |
| error              |       | 0,018 |       | 0,011             |       |
| s [Å]              | 0,1*  | 0,1*  |       | 0,0887            |       |
| error (inaccurate) |       |       |       | 0,013             |       |
| N                  | 0*    | 2,58  |       | 4,28              |       |
| error              |       | 0,6   |       | 1,9               |       |
| 2s2                | 0,02* | 0,02* |       | 0,0157            |       |
| error              |       |       |       | 0,0045            |       |

#### PtNiC\_H3PO4\_180C\_Pt\_L3\_0027

| #                  | Pt-O  | Pt-Ni | Pt-Pt | R-factor filtered |       |
|--------------------|-------|-------|-------|-------------------|-------|
| R [Å]              | 1,9*  | 2,617 |       | 2,701             | 15,36 |
| error              |       | 0,019 |       | 0,0091            |       |
| s [Å]              | 0,1*  | 0,1*  |       | 0,0805            |       |
| error (inaccurate) |       |       |       | 0,013             |       |
| N                  | 0*    | 2,41  |       | 4,07              |       |
| error              |       | 0,63  |       | 1,7               |       |
| 2s2                | 0,02* | 0,02* |       | 0,0129            |       |
| error              |       |       |       | 0,0041            |       |

#### PtNiC\_H3PO4\_180C\_Pt\_L3\_0028

| #                  | Pt-O | Pt-Ni | Pt-Pt | R-factor filtered |       |
|--------------------|------|-------|-------|-------------------|-------|
| R [Å]              | 2*   | 2,605 |       | 2,7               | 15,36 |
| error              |      | 0,018 |       | 0,01              |       |
| s [Å]              | 0,1* | 0,1*  |       | 0,0796            |       |
| error (inaccurate) |      |       |       | 0,015             |       |

|       |       |       |        |
|-------|-------|-------|--------|
| N     | 0*    | 2,56  | 3,64   |
| error |       | 0,64  | 1,7    |
| 2s2   | 0,02* | 0,02* | 0,0127 |
| error |       |       | 0,0046 |

#### PtNiC\_H3PO4\_180C\_Pt\_L3\_0029

| #                  | Pt-O  | Pt-Ni | Pt-Pt | R-factor filtered |       |
|--------------------|-------|-------|-------|-------------------|-------|
| R [Å]              | 1,9*  | 2,617 |       | 2,7               | 15,36 |
| error              |       | 0,018 |       | 0,0093            |       |
| s [Å]              | 0,1*  | 0,1*  |       | 0,0804            |       |
| error (inaccurate) |       |       |       | 0,014             |       |
| N                  | 0*    | 2,64  |       | 3,87              |       |
| error              |       | 0,62  |       | 1,7               |       |
| 2s2                | 0,02* | 0,02* |       | 0,0129            |       |
| error              |       |       |       | 0,0043            |       |

#### PtNiC\_H3PO4\_180C\_Pt\_L3\_0030

| #                  | Pt-O  | Pt-Ni | Pt-Pt | R-factor filtered |       |
|--------------------|-------|-------|-------|-------------------|-------|
| R [Å]              | 1,9*  | 2,6   |       | 2,704             | 15,36 |
| error              |       | 0,02  |       | 0,0098            |       |
| s [Å]              | 0,1*  | 0,1*  |       | 0,0793            |       |
| error (inaccurate) |       |       |       | 0,014             |       |
| N                  | 0*    | 2,24  |       | 3,93              |       |
| error              |       | 0,64  |       | 1,7               |       |
| 2s2                | 0,02* | 0,02* |       | 0,0126            |       |
| error              |       |       |       | 0,0042            |       |

#### PtNiC\_H3PO4\_180C\_Pt\_L3\_0031

| #                  | Pt-O  | Pt-Ni | Pt-Pt | R-factor filtered |       |
|--------------------|-------|-------|-------|-------------------|-------|
| R [Å]              | 1,9*  | 2,615 |       | 2,704             | 15,84 |
| error              |       | 0,017 |       | 0,0099            |       |
| s [Å]              | 0,1*  | 0,1*  |       | 0,082             |       |
| error (inaccurate) |       |       |       | 0,014             |       |
| N                  | 0*    | 2,7   |       | 3,89              |       |
| error              |       | 0,62  |       | 1,8               |       |
| 2s2                | 0,02* | 0,02* |       | 0,0135            |       |
| error              |       |       |       | 0,0045            |       |

#### PtNiC\_H3PO4\_180C\_Pt\_L3\_0032

| #                  | Pt-O  | Pt-Ni | Pt-Pt | R-factor filtered |       |
|--------------------|-------|-------|-------|-------------------|-------|
| R [Å]              | 1,9*  | 2,626 |       | 2,704             | 15,84 |
| error              |       | 0,017 |       | 0,0098            |       |
| s [Å]              | 0,1*  | 0,1*  |       | 0,0867            |       |
| error (inaccurate) |       |       |       | 0,012             |       |
| N                  | 0*    | 2,59  |       | 4,43              |       |
| error              |       | 0,6   |       | 1,8               |       |
| 2s2                | 0,02* | 0,02* |       | 0,015             |       |
| error              |       |       |       | 0,0041            |       |

## PtNiC\_H3PO4\_180C\_Pt\_L3\_0033

| #                  | Pt-O  | Pt-Ni | Pt-Pt | R-factor filtered |       |
|--------------------|-------|-------|-------|-------------------|-------|
| R [Å]              | 1,9*  | 2,619 |       | 2,704             | 15,84 |
| error              |       | 0,018 |       | 0,0099            |       |
| s [Å]              | 0,1*  | 0,1*  |       | 0,0857            |       |
| error (inaccurate) |       |       |       | 0,013             |       |
| N                  | 0*    | 2,47  |       | 4,38              |       |
| error              |       | 0,61  |       | 1,8               |       |
| 2s2                | 0,02* | 0,02* |       | 0,0147            |       |
| error              |       |       |       | 0,0043            |       |

## PtNiC\_H3PO4\_180C\_Pt\_L3\_0034

| #                  | Pt-O  | Pt-Ni | Pt-Pt | R-factor filtered |       |
|--------------------|-------|-------|-------|-------------------|-------|
| R [Å]              | 1,9*  | 2,609 |       | 2,706             | 15,84 |
| error              |       | 0,019 |       | 0,0096            |       |
| s [Å]              | 0,1*  | 0,1*  |       | 0,0782            |       |
| error (inaccurate) |       |       |       | 0,014             |       |
| N                  | 0*    | 2,41  |       | 3,77              |       |
| error              |       | 0,64  |       | 1,7               |       |
| 2s2                | 0,02* | 0,02* |       | 0,0122            |       |
| error              |       |       |       | 0,0043            |       |

## PtNiC\_H3PO4\_180C\_Pt\_L3\_0035

| #                  | Pt-O  | Pt-Ni | Pt-Pt | R-factor filtered |       |
|--------------------|-------|-------|-------|-------------------|-------|
| R [Å]              | 1,9*  | 2,615 |       | 2,705             | 15,84 |
| error              |       | 0,017 |       | 0,01              |       |
| s [Å]              | 0,1*  | 0,1*  |       | 0,083             |       |
| error (inaccurate) |       |       |       | 0,014             |       |
| N                  | 0*    | 2,76  |       | 3,75              |       |
| error              |       | 0,62  |       | 1,8               |       |
| 2s2                | 0,02* | 0,02* |       | 0,0138            |       |
| error              |       |       |       | 0,0047            |       |

## PtNiC\_H3PO4\_180C\_Pt\_L3\_0036

| #                  | Pt-O  | Pt-Ni | Pt-Pt | R-factor filtered |       |
|--------------------|-------|-------|-------|-------------------|-------|
| R [Å]              | 1,9*  | 2,603 |       | 2,714             | 15,84 |
| error              |       | 0,018 |       | 0,01              |       |
| s [Å]              | 0,1*  | 0,1*  |       | 0,0807            |       |
| error (inaccurate) |       |       |       | 0,013             |       |
| N                  | 0*    | 2,53  |       | 3,95              |       |
| error              |       | 0,62  |       | 1,7               |       |
| 2s2                | 0,02* | 0,02* |       | 0,013             |       |
| error              |       |       |       | 0,0042            |       |

## PtNiC\_H3PO4\_180C\_Pt\_L3\_0037

| #     | Pt-O | Pt-Ni | Pt-Pt | R-factor filtered |       |
|-------|------|-------|-------|-------------------|-------|
| R [Å] | 1,9* | 2,612 |       | 2,708             | 15,84 |

|                    |       |       |        |
|--------------------|-------|-------|--------|
| error              |       | 0,018 | 0,0099 |
| s [Å]              | 0,1*  | 0,1*  | 0,0797 |
| error (inaccurate) |       |       | 0,014  |
| N                  | 0*    | 2,55  | 3,74   |
| error              |       | 0,63  | 1,7    |
| 2s2                | 0,02* | 0,02* | 0,0127 |
| error              |       |       | 0,0044 |

#### PtNiC\_H3PO4\_180C\_Pt\_L3\_0038

| #                  | Pt-O  | Pt-Ni | Pt-Pt | R-factor filtered |       |
|--------------------|-------|-------|-------|-------------------|-------|
| R [Å]              | 2*    | 2,612 |       | 2,707             | 15,84 |
| error              |       | 0,017 |       | 0,01              |       |
| s [Å]              | 0,1*  | 0,1*  |       | 0,0834            |       |
| error (inaccurate) |       |       |       | 0,013             |       |
| N                  | 0*    | 2,69  |       | 3,91              |       |
| error              |       | 0,62  |       | 1,8               |       |
| 2s2                | 0,02* | 0,02* |       | 0,0139            |       |
| error              |       |       |       | 0,0044            |       |

#### PtNiC\_H3PO4\_180C\_Pt\_L3\_0039

| #                  | Pt-O  | Pt-Ni | Pt-Pt | R-factor filtered |       |
|--------------------|-------|-------|-------|-------------------|-------|
| R [Å]              | 1,9*  | 2,618 |       | 2,694             | 15,84 |
| error              |       | 0,018 |       | 0,011             |       |
| s [Å]              | 0,1*  | 0,1*  |       | 0,0875            |       |
| error (inaccurate) |       |       |       | 0,014             |       |
| N                  | 0*    | 2,7   |       | 3,99              |       |
| error              |       | 0,59  |       | 1,8               |       |
| 2s2                | 0,02* | 0,02* |       | 0,0153            |       |
| error              |       |       |       | 0,0048            |       |

#### PtNiC\_H3PO4\_180C\_Pt\_L3\_0040

| #                  | Pt-O  | Pt-Ni | Pt-Pt | R-factor filtered |       |
|--------------------|-------|-------|-------|-------------------|-------|
| R [Å]              | 1,9*  | 2,611 |       | 2,702             | 15,84 |
| error              |       | 0,018 |       | 0,01              |       |
| s [Å]              | 0,1*  | 0,1*  |       | 0,0809            |       |
| error (inaccurate) |       |       |       | 0,014             |       |
| N                  | 0*    | 2,7   |       | 3,67              |       |
| error              |       | 0,63  |       | 1,7               |       |
| 2s2                | 0,02* | 0,02* |       | 0,0131            |       |
| error              |       |       |       | 0,0046            |       |

#### PtNiC\_H3PO4\_180C\_Pt\_L3\_0041

| #                  | Pt-O | Pt-Ni | Pt-Pt | R-factor filtered |       |
|--------------------|------|-------|-------|-------------------|-------|
| R [Å]              | 1,9* | 2,617 |       | 2,703             | 15,49 |
| error              |      | 0,018 |       | 0,0098            |       |
| s [Å]              | 0,1* | 0,1*  |       | 0,079             |       |
| error (inaccurate) |      |       |       | 0,015             |       |
| N                  | 0*   | 2,67  |       | 3,51              |       |



|       |       |       |        |
|-------|-------|-------|--------|
| error |       | 0,63  | 1,7    |
| 2s2   | 0,02* | 0,02* | 0,0125 |
| error |       |       | 0,0046 |

#### PtNiC\_H3PO4\_180C\_Pt\_L3\_0042

| #                  | Pt-O  | Pt-Ni | Pt-Pt | R-factor filtered |       |
|--------------------|-------|-------|-------|-------------------|-------|
| R [Å]              | 1,9*  | 2,617 |       | 2,703             | 15,49 |
| error              |       | 0,019 |       | 0,0094            |       |
| s [Å]              | 0,1*  | 0,1*  |       | 0,0809            |       |
| error (inaccurate) |       |       |       | 0,013             |       |
| N                  | 0*    | 2,4   |       | 4                 |       |
| error              |       | 0,62  |       | 1,7               |       |
| 2s2                | 0,02* | 0,02* |       | 0,0131            |       |
| error              |       |       |       | 0,0042            |       |

#### PtNiC\_H3PO4\_180C\_Pt\_L3\_0043

| #                  | Pt-O  | Pt-Ni | Pt-Pt | R-factor filtered |       |
|--------------------|-------|-------|-------|-------------------|-------|
| R [Å]              | 1,9*  | 2,614 |       | 2,698             | 15,49 |
| error              |       | 0,019 |       | 0,0097            |       |
| s [Å]              | 0,1*  | 0,1*  |       | 0,0831            |       |
| error (inaccurate) |       |       |       | 0,013             |       |
| N                  | 0*    | 2,33  |       | 4,16              |       |
| error              |       | 0,62  |       | 1,8               |       |
| 2s2                | 0,02* | 0,02* |       | 0,0138            |       |
| error              |       |       |       | 0,0042            |       |

#### PtNiC\_H3PO4\_180C\_Pt\_L3\_0044

| #                  | Pt-O  | Pt-Ni | Pt-Pt | R-factor filtered |       |
|--------------------|-------|-------|-------|-------------------|-------|
| R [Å]              | 1,9*  | 2,605 |       | 2,701             | 15,49 |
| error              |       | 0,019 |       | 0,0099            |       |
| s [Å]              | 0,1*  | 0,1*  |       | 0,0761            |       |
| error (inaccurate) |       |       |       | 0,015             |       |
| N                  | 0*    | 2,59  |       | 3,37              |       |
| error              |       | 0,64  |       | 1,6               |       |
| 2s2                | 0,02* | 0,02* |       | 0,0116            |       |
| error              |       |       |       | 0,0046            |       |

#### PtNiC\_H3PO4\_180C\_Pt\_L3\_0045

| #                  | Pt-O  | Pt-Ni | Pt-Pt | R-factor filtered |       |
|--------------------|-------|-------|-------|-------------------|-------|
| R [Å]              | 1,9*  | 2,616 |       | 2,707             | 15,49 |
| error              |       | 0,018 |       | 0,01              |       |
| s [Å]              | 0,1*  | 0,1*  |       | 0,0863            |       |
| error (inaccurate) |       |       |       | 0,013             |       |
| N                  | 0*    | 2,57  |       | 4,22              |       |
| error              |       | 0,61  |       | 1,8               |       |
| 2s2                | 0,02* | 0,02* |       | 0,0149            |       |
| error              |       |       |       | 0,0045            |       |

## PtNiC\_H3PO4\_180C\_Pt\_L3\_0046

| #                  | Pt-O  | Pt-Ni | Pt-Pt | R-factor filtered |       |
|--------------------|-------|-------|-------|-------------------|-------|
| R [Å]              | 1,9*  | 2,623 |       | 2,702             | 15,49 |
| error              |       | 0,019 |       | 0,0092            |       |
| s [Å]              | 0,1*  | 0,1*  |       | 0,082             |       |
| error (inaccurate) |       |       |       | 0,013             |       |
| N                  | 0*    | 2,48  |       | 4,16              |       |
| error              |       | 0,61  |       | 1,7               |       |
| 2s2                | 0,02* | 0,02* |       | 0,0134            |       |
| error              |       |       |       | 0,0041            |       |

## PtNiC\_H3PO4\_180C\_Pt\_L3\_0047

| #                  | Pt-O  | Pt-Ni | Pt-Pt | R-factor filtered |       |
|--------------------|-------|-------|-------|-------------------|-------|
| R [Å]              | 1,9*  | 2,604 |       | 2,699             | 15,49 |
| error              |       | 0,019 |       | 0,01              |       |
| s [Å]              | 0,1*  | 0,1*  |       | 0,0775            |       |
| error (inaccurate) |       |       |       | 0,015             |       |
| N                  | 0*    | 2,55  |       | 3,49              |       |
| error              |       | 0,64  |       | 1,7               |       |
| 2s2                | 0,02* | 0,02* |       | 0,012             |       |
| error              |       |       |       | 0,0046            |       |

## PtNiC\_H3PO4\_180C\_Pt\_L3\_0048

| #                  | Pt-O  | Pt-Ni | Pt-Pt | R-factor filtered |       |
|--------------------|-------|-------|-------|-------------------|-------|
| R [Å]              | 2*    | 2,605 |       | 2,708             | 15,49 |
| error              |       | 0,018 |       | 0,0097            |       |
| s [Å]              | 0,1*  | 0,1*  |       | 0,0732            |       |
| error (inaccurate) |       |       |       | 0,016             |       |
| N                  | 0*    | 2,63  |       | 3,25              |       |
| error              |       | 0,64  |       | 1,6               |       |
| 2s2                | 0,02* | 0,02* |       | 0,0107            |       |
| error              |       |       |       | 0,0045            |       |

## PtNiC\_H3PO4\_180C\_Pt\_L3\_0049

| #                  | Pt-O  | Pt-Ni | Pt-Pt | R-factor filtered |       |
|--------------------|-------|-------|-------|-------------------|-------|
| R [Å]              | 1,9*  | 2,616 |       | 2,7               | 15,49 |
| error              |       | 0,018 |       | 0,0096            |       |
| s [Å]              | 0,1*  | 0,1*  |       | 0,0827            |       |
| error (inaccurate) |       |       |       | 0,013             |       |
| N                  | 0*    | 2,51  |       | 4,09              |       |
| error              |       | 0,62  |       | 1,8               |       |
| 2s2                | 0,02* | 0,02* |       | 0,0137            |       |
| error              |       |       |       | 0,0043            |       |

## PtNiC\_H3PO4\_180C\_Pt\_L3\_0050

| #     | Pt-O | Pt-Ni | Pt-Pt | R-factor filtered |       |
|-------|------|-------|-------|-------------------|-------|
| R [Å] | 1,9* | 2,621 |       | 2,699             | 15,49 |
| error |      | 0,018 |       | 0,01              |       |

|                    |       |       |        |
|--------------------|-------|-------|--------|
| s [Å]              | 0,1*  | 0,1*  | 0,0828 |
| error (inaccurate) |       |       | 0,014  |
| N                  | 0*    | 2,64  | 3,84   |
| error              |       | 0,61  | 1,8    |
| 2s2                | 0,02* | 0,02* | 0,0137 |
| error              |       |       | 0,0046 |

#### PtNiC\_H3PO4\_180C\_Pt\_L3\_0051

| #                  | Pt-O  | Pt-Ni | Pt-Pt | R-factor filtered |       |
|--------------------|-------|-------|-------|-------------------|-------|
| R [Å]              | 1,9*  | 2,617 |       | 2,702             | 15,69 |
| error              |       | 0,018 |       | 0,01              |       |
| s [Å]              | 0,1*  | 0,1*  |       | 0,0779            |       |
| error (inaccurate) |       |       |       | 0,016             |       |
| N                  | 0*    | 2,81  |       | 3,34              |       |
| error              |       | 0,63  |       | 1,7               |       |
| 2s2                | 0,02* | 0,02* |       | 0,0121            |       |
| error              |       |       |       | 0,0048            |       |

#### PtNiC\_H3PO4\_180C\_Pt\_L3\_0052

| #                  | Pt-O  | Pt-Ni | Pt-Pt | R-factor filtered |       |
|--------------------|-------|-------|-------|-------------------|-------|
| R [Å]              | 1,9*  | 2,609 |       | 2,704             | 15,69 |
| error              |       | 0,019 |       | 0,0092            |       |
| s [Å]              | 0,1*  | 0,1*  |       | 0,082             |       |
| error (inaccurate) |       |       |       | 0,012             |       |
| N                  | 0*    | 2,23  |       | 4,33              |       |
| error              |       | 0,63  |       | 1,8               |       |
| 2s2                | 0,02* | 0,02* |       | 0,0134            |       |
| error              |       |       |       | 0,004             |       |

#### PtNiC\_H3PO4\_180C\_Pt\_L3\_0053

| #                  | Pt-O  | Pt-Ni | Pt-Pt | R-factor filtered |       |
|--------------------|-------|-------|-------|-------------------|-------|
| R [Å]              | 1,9*  | 2,604 |       | 2,711             | 15,69 |
| error              |       | 0,019 |       | 0,01              |       |
| s [Å]              | 0,1*  | 0,1*  |       | 0,0786            |       |
| error (inaccurate) |       |       |       | 0,014             |       |
| N                  | 0*    | 2,43  |       | 3,66              |       |
| error              |       | 0,63  |       | 1,7               |       |
| 2s2                | 0,02* | 0,02* |       | 0,0124            |       |
| error              |       |       |       | 0,0045            |       |

#### PtNiC\_H3PO4\_180C\_Pt\_L3\_0054

| #                  | Pt-O | Pt-Ni | Pt-Pt | R-factor filtered |       |
|--------------------|------|-------|-------|-------------------|-------|
| R [Å]              | 1,9* | 2,62  |       | 2,702             | 15,69 |
| error              |      | 0,018 |       | 0,0094            |       |
| s [Å]              | 0,1* | 0,1*  |       | 0,0801            |       |
| error (inaccurate) |      |       |       | 0,013             |       |
| N                  | 0*   | 2,52  |       | 3,78              |       |
| error              |      | 0,62  |       | 1,7               |       |

|       |       |       |        |
|-------|-------|-------|--------|
| 2s2   | 0,02* | 0,02* | 0,0128 |
| error |       |       | 0,0042 |

#### PtNiC\_H3PO4\_180C\_Pt\_L3\_0055

| #                  | Pt-O  | Pt-Ni | Pt-Pt | R-factor filtered |
|--------------------|-------|-------|-------|-------------------|
| R [Å]              | 1,9*  | 2,612 |       | 2,703 15,69       |
| error              |       | 0,018 |       | 0,0097            |
| s [Å]              | 0,1*  | 0,1*  |       | 0,0775            |
| error (inaccurate) |       |       |       | 0,015             |
| N                  | 0*    | 2,6   |       | 3,5               |
| error              |       | 0,63  |       | 1,7               |
| 2s2                | 0,02* | 0,02* |       | 0,012             |
| error              |       |       |       | 0,0045            |

#### PtNiC\_H3PO4\_180C\_Pt\_L3\_0056

| #                  | Pt-O  | Pt-Ni | Pt-Pt | R-factor filtered |
|--------------------|-------|-------|-------|-------------------|
| R [Å]              | 1,9*  | 2,607 |       | 2,709 15,69       |
| error              |       | 0,017 |       | 0,01              |
| s [Å]              | 0,1*  | 0,1*  |       | 0,0814            |
| error (inaccurate) |       |       |       | 0,014             |
| N                  | 0*    | 2,67  |       | 3,81              |
| error              |       | 0,63  |       | 1,7               |
| 2s2                | 0,02* | 0,02* |       | 0,0132            |
| error              |       |       |       | 0,0045            |

#### PtNiC\_H3PO4\_180C\_Pt\_L3\_0057

| #                  | Pt-O  | Pt-Ni | Pt-Pt | R-factor filtered |
|--------------------|-------|-------|-------|-------------------|
| R [Å]              | 1,9*  | 2,61  |       | 2,7 15,69         |
| error              |       | 0,018 |       | 0,0099            |
| s [Å]              | 0,1*  | 0,1*  |       | 0,0815            |
| error (inaccurate) |       |       |       | 0,014             |
| N                  | 0*    | 2,56  |       | 3,86              |
| error              |       | 0,62  |       | 1,7               |
| 2s2                | 0,02* | 0,02* |       | 0,0133            |
| error              |       |       |       | 0,0044            |

#### PtNiC\_H3PO4\_180C\_Pt\_L3\_0058

| #                  | Pt-O  | Pt-Ni | Pt-Pt | R-factor filtered |
|--------------------|-------|-------|-------|-------------------|
| R [Å]              | 2*    | 2,623 |       | 2,703 15,69       |
| error              |       | 0,018 |       | 0,01              |
| s [Å]              | 0,1*  | 0,1*  |       | 0,086             |
| error (inaccurate) |       |       |       | 0,013             |
| N                  | 0*    | 2,53  |       | 4,16              |
| error              |       | 0,6   |       | 1,8               |
| 2s2                | 0,02* | 0,02* |       | 0,0148            |
| error              |       |       |       | 0,0044            |

#### PtNiC\_H3PO4\_180C\_Pt\_L3\_0059

| #                  | Pt-O  | Pt-Ni | Pt-Pt | R-factor filtered |       |
|--------------------|-------|-------|-------|-------------------|-------|
| R [Å]              | 1,9*  | 2,596 |       | 2,705             | 15,69 |
| error              |       | 0,02  |       | 0,0099            |       |
| s [Å]              | 0,1*  | 0,1*  |       | 0,0801            |       |
| error (inaccurate) |       |       |       | 0,013             |       |
| N                  | 0*    | 2,25  |       | 3,99              |       |
| error              |       | 0,63  |       | 1,7               |       |
| 2s2                | 0,02* | 0,02* |       | 0,0128            |       |
| error              |       |       |       | 0,0042            |       |

#### PtNiC\_H3PO4\_180C\_Pt\_L3\_0060

| #                  | Pt-O  | Pt-Ni | Pt-Pt | R-factor filtered |       |
|--------------------|-------|-------|-------|-------------------|-------|
| R [Å]              | 1,9*  | 2,613 |       | 2,706             | 15,69 |
| error              |       | 0,018 |       | 0,0098            |       |
| s [Å]              | 0,1*  | 0,1*  |       | 0,0792            |       |
| error (inaccurate) |       |       |       | 0,014             |       |
| N                  | 0*    | 2,64  |       | 3,7               |       |
| error              |       | 0,63  |       | 1,7               |       |
| 2s2                | 0,02* | 0,02* |       | 0,0126            |       |
| error              |       |       |       | 0,0045            |       |

#### PtNiC\_H3PO4\_180C\_Pt\_L3\_0061

| #                  | Pt-O  | Pt-Ni | Pt-Pt | R-factor filtered |       |
|--------------------|-------|-------|-------|-------------------|-------|
| R [Å]              | 1,9*  | 2,62  |       | 2,704             | 19,16 |
| error              |       | 0,018 |       | 0,01              |       |
| s [Å]              | 0,1*  | 0,1*  |       | 0,0869            |       |
| error (inaccurate) |       |       |       | 0,013             |       |
| N                  | 0*    | 2,52  |       | 4,23              |       |
| error              |       | 0,6   |       | 1,8               |       |
| 2s2                | 0,02* | 0,02* |       | 0,0151            |       |
| error              |       |       |       | 0,0044            |       |

#### PtNiC\_H3PO4\_180C\_Pt\_L3\_0062

| #                  | Pt-O  | Pt-Ni | Pt-Pt | R-factor filtered |       |
|--------------------|-------|-------|-------|-------------------|-------|
| R [Å]              | 1,9*  | 2,619 |       | 2,705             | 19,16 |
| error              |       | 0,02  |       | 0,0087            |       |
| s [Å]              | 0,1*  | 0,1*  |       | 0,0836            |       |
| error (inaccurate) |       |       |       | 0,011             |       |
| N                  | 0*    | 2,2   |       | 4,74              |       |
| error              |       | 0,62  |       | 1,8               |       |
| 2s2                | 0,02* | 0,02* |       | 0,014             |       |
| error              |       |       |       | 0,0037            |       |

#### PtNiC\_H3PO4\_180C\_Pt\_L3\_0063

| #     | Pt-O | Pt-Ni | Pt-Pt | R-factor filtered |       |
|-------|------|-------|-------|-------------------|-------|
| R [Å] | 1,9* | 2,599 |       | 2,706             | 19,16 |
| error |      | 0,019 |       | 0,01              |       |
| s [Å] | 0,1* | 0,1*  |       | 0,0712            |       |

|                    |       |       |        |
|--------------------|-------|-------|--------|
| error (inaccurate) |       |       | 0,017  |
| N                  | 0*    | 2,6   | 3,07   |
| error              |       | 0,65  | 1,6    |
| 2s2                | 0,02* | 0,02* | 0,0101 |
| error              |       |       | 0,0046 |

#### PtNiC\_H3PO4\_180C\_Pt\_L3\_0064

| #                  | Pt-O  | Pt-Ni | Pt-Pt | R-factor filtered |
|--------------------|-------|-------|-------|-------------------|
| R [Å]              | 1,9*  | 2,609 |       | 2,711 19,16       |
| error              |       | 0,018 |       | 0,0099            |
| s [Å]              | 0,1*  | 0,1*  |       | 0,08              |
| error (inaccurate) |       |       |       | 0,014             |
| N                  | 0*    | 2,61  |       | 3,81              |
| error              |       | 0,63  |       | 1,7               |
| 2s2                | 0,02* | 0,02* |       | 0,0128            |
| error              |       |       |       | 0,0044            |

#### PtNiC\_H3PO4\_180C\_Pt\_L3\_0065

| #                  | Pt-O  | Pt-Ni | Pt-Pt | R-factor filtered |
|--------------------|-------|-------|-------|-------------------|
| R [Å]              | 1,9*  | 2,609 |       | 2,707 19,16       |
| error              |       | 0,02  |       | 0,0092            |
| s [Å]              | 0,1*  | 0,1*  |       | 0,0812            |
| error (inaccurate) |       |       |       | 0,012             |
| N                  | 0*    | 2,21  |       | 4,3               |
| error              |       | 0,63  |       | 1,7               |
| 2s2                | 0,02* | 0,02* |       | 0,0132            |
| error              |       |       |       | 0,0039            |

#### PtNiC\_H3PO4\_180C\_Pt\_L3\_0066

| #                  | Pt-O  | Pt-Ni | Pt-Pt | R-factor filtered |
|--------------------|-------|-------|-------|-------------------|
| R [Å]              | 1,9*  | 2,617 |       | 2,704 19,16       |
| error              |       | 0,018 |       | 0,0097            |
| s [Å]              | 0,1*  | 0,1*  |       | 0,0799            |
| error (inaccurate) |       |       |       | 0,014             |
| N                  | 0*    | 2,56  |       | 3,72              |
| error              |       | 0,63  |       | 1,7               |
| 2s2                | 0,02* | 0,02* |       | 0,0128            |
| error              |       |       |       | 0,0045            |

#### PtNiC\_H3PO4\_180C\_Pt\_L3\_0067

| #                  | Pt-O  | Pt-Ni | Pt-Pt | R-factor filtered |
|--------------------|-------|-------|-------|-------------------|
| R [Å]              | 1,9*  | 2,603 |       | 2,713 19,16       |
| error              |       | 0,018 |       | 0,01              |
| s [Å]              | 0,1*  | 0,1*  |       | 0,0788            |
| error (inaccurate) |       |       |       | 0,014             |
| N                  | 0*    | 2,64  |       | 3,69              |
| error              |       | 0,63  |       | 1,7               |
| 2s2                | 0,02* | 0,02* |       | 0,0124            |

error

0,0044

PtNiC\_H3PO4\_180C\_Pt\_L3\_0070

| #                  | Pt-O  | Pt-Ni | Pt-Pt | R-factor filtered |       |
|--------------------|-------|-------|-------|-------------------|-------|
| R [Å]              | 1,9*  | 2,604 |       | 2,712             | 19,16 |
| error              |       | 0,017 |       | 0,012             |       |
| s [Å]              | 0,1*  | 0,1*  |       | 0,0845            |       |
| error (inaccurate) |       |       |       | 0,015             |       |
| N                  | 0*    | 2,76  |       | 3,71              |       |
| error              |       | 0,61  |       | 1,8               |       |
| 2s2                | 0,02* | 0,02* |       | 0,0143            |       |
| error              |       |       |       | 0,0049            |       |

PtNiC\_H3PO4\_180C\_Pt\_L3\_0071

| #                  | Pt-O  | Pt-Ni | Pt-Pt | R-factor filtered |       |
|--------------------|-------|-------|-------|-------------------|-------|
| R [Å]              | 1,9*  | 2,629 |       | 2,713             | 19,84 |
| error              |       | 0     |       | 0                 |       |
| s [Å]              | 0,1*  | 0,1*  |       | 0,0914            |       |
| error (inaccurate) |       |       |       | 0                 |       |
| N                  | 0*    | 2,54  |       | 4,44              |       |
| error              |       | 0     |       | 0                 |       |
| 2s2                | 0,02* | 0,02* |       | 0,0167            |       |
| error              |       |       |       | 0                 |       |

PtNiC\_H3PO4\_180C\_Pt\_L3\_0072

| # | Pt-O | Pt-Ni | Pt-Pt | R-factor filtered |  |
|---|------|-------|-------|-------------------|--|
|---|------|-------|-------|-------------------|--|

|                    |       |       |        |       |
|--------------------|-------|-------|--------|-------|
| R [Å]              | 1,9*  | 2,625 | 2,704  | 19,84 |
| error              |       | 0     | 0      |       |
| s [Å]              | 0,1*  | 0,1*  | 0,0777 |       |
| error (inaccurate) |       |       | 0      |       |
| N                  | 0*    | 1,56  | 4,5    |       |
| error              |       | 0     | 0      |       |
| 2s2                | 0,02* | 0,02* | 0,0121 |       |
| error              |       |       | 0      |       |

#### PtNiC\_H3PO4\_180C\_Pt\_L3\_0073

| #                  | Pt-O  | Pt-Ni | Pt-Pt | R-factor filtered |       |
|--------------------|-------|-------|-------|-------------------|-------|
| R [Å]              | 1,9*  | 2,6   |       | 2,712             | 19,84 |
| error              |       | 0     |       | 0                 |       |
| s [Å]              | 0,1*  | 0,1*  |       | 0,084             |       |
| error (inaccurate) |       |       |       | 0                 |       |
| N                  | 0*    | 2,99  |       | 3,75              |       |
| error              |       | 0     |       | 0                 |       |
| 2s2                | 0,02* | 0,02* |       | 0,0141            |       |
| error              |       |       |       | 0                 |       |

#### PtNiC\_H3PO4\_180C\_Pt\_L3\_0074

| #                  | Pt-O  | Pt-Ni | Pt-Pt | R-factor filtered |       |
|--------------------|-------|-------|-------|-------------------|-------|
| R [Å]              | 1,9*  | 2,625 |       | 2,712             | 19,84 |
| error              |       | 0     |       | 0                 |       |
| s [Å]              | 0,1*  | 0,1*  |       | 0,0856            |       |
| error (inaccurate) |       |       |       | 0                 |       |
| N                  | 0*    | 2,86  |       | 4,07              |       |
| error              |       | 0     |       | 0                 |       |
| 2s2                | 0,02* | 0,02* |       | 0,0146            |       |
| error              |       |       |       | 0                 |       |

#### PtNiC\_H3PO4\_180C\_Pt\_L3\_0075

| #                  | Pt-O  | Pt-Ni | Pt-Pt | R-factor filtered |       |
|--------------------|-------|-------|-------|-------------------|-------|
| R [Å]              | 1,9*  | 2,612 |       | 2,697             | 19,84 |
| error              |       | 0     |       | 0                 |       |
| s [Å]              | 0,1*  | 0,1*  |       | 0,0753            |       |
| error (inaccurate) |       |       |       | 0                 |       |
| N                  | 0*    | 2,07  |       | 3,97              |       |
| error              |       | 0     |       | 0                 |       |
| 2s2                | 0,02* | 0,02* |       | 0,0113            |       |
| error              |       |       |       | 0                 |       |

#### PtNiC\_H3PO4\_180C\_Pt\_L3\_0076

| #                  | Pt-O | Pt-Ni | Pt-Pt | R-factor filtered |       |
|--------------------|------|-------|-------|-------------------|-------|
| R [Å]              | 1,9* | 2,583 |       | 2,703             | 19,84 |
| error              |      | 0     |       | 0                 |       |
| s [Å]              | 0,1* | 0,1*  |       | 0,0744            |       |
| error (inaccurate) |      |       |       | 0                 |       |



|       |       |       |        |
|-------|-------|-------|--------|
| N     | 0*    | 2,35  | 3,65   |
| error |       | 0     | 0      |
| 2s2   | 0,02* | 0,02* | 0,0111 |
| error |       |       | 0      |

#### PtNiC\_H3PO4\_180C\_Pt\_L3\_0077

| #                  | Pt-O  | Pt-Ni | Pt-Pt | R-factor filtered |       |
|--------------------|-------|-------|-------|-------------------|-------|
| R [Å]              | 1,9*  | 2,616 |       | 2,715             | 19,84 |
| error              |       | 0     |       | 0                 |       |
| s [Å]              | 0,1*  | 0,1*  |       | 0,074             |       |
| error (inaccurate) |       |       |       | 0                 |       |
| N                  | 0*    | 3,2   |       | 2,6               |       |
| error              |       | 0     |       | 0                 |       |
| 2s2                | 0,02* | 0,02* |       | 0,011             |       |
| error              |       |       |       | 0                 |       |

#### PtNiC\_H3PO4\_180C\_Pt\_L3\_0078

| #                  | Pt-O  | Pt-Ni | Pt-Pt | R-factor filtered |       |
|--------------------|-------|-------|-------|-------------------|-------|
| R [Å]              | 2*    | 2,637 |       | 2,692             | 19,84 |
| error              |       | 0     |       | 0                 |       |
| s [Å]              | 0,1*  | 0,1*  |       | 0,081             |       |
| error (inaccurate) |       |       |       | 0                 |       |
| N                  | 0*    | 2,18  |       | 4,89              |       |
| error              |       | 0     |       | 0                 |       |
| 2s2                | 0,02* | 0,02* |       | 0,0131            |       |
| error              |       |       |       | 0                 |       |

#### PtNiC\_H3PO4\_180C\_Pt\_L3\_0079

| #                  | Pt-O  | Pt-Ni | Pt-Pt | R-factor filtered |       |
|--------------------|-------|-------|-------|-------------------|-------|
| R [Å]              | 1,9*  | 2,586 |       | 2,713             | 19,84 |
| error              |       | 0     |       | 0                 |       |
| s [Å]              | 0,1*  | 0,1*  |       | 0,0757            |       |
| error (inaccurate) |       |       |       | 0                 |       |
| N                  | 0*    | 2,72  |       | 3,51              |       |
| error              |       | 0     |       | 0                 |       |
| 2s2                | 0,02* | 0,02* |       | 0,0115            |       |
| error              |       |       |       | 0                 |       |

S02 = 0,78

Time (min)

|                   | Sample                   |     |
|-------------------|--------------------------|-----|
|                   | PtNiC_dry_Ni_K           | 0   |
|                   | PtNiC_dry_140C_Ni_K      | 0   |
| average 8 spectra | PtNiC_H3PO4_140C_Ni_K_1  | 18  |
| average 8 spectra | PtNiC_H3PO4_140C_Ni_K_2  | 36  |
| average 8 spectra | PtNiC_H3PO4_140C_Ni_K_3  | 54  |
| average 8 spectra | PtNiC_H3PO4_140C_Ni_K_4  | 72  |
| average 8 spectra | PtNiC_H3PO4_140C_Ni_K_5  | 90  |
| average 8 spectra | PtNiC_H3PO4_140C_Ni_K_6  | 108 |
| average 8 spectra | PtNiC_H3PO4_140C_Ni_K_7  | 126 |
| average 8 spectra | PtNiC_H3PO4_140C_Ni_K_8  | 144 |
| average 8 spectra | PtNiC_H3PO4_140C_Ni_K_9  | 162 |
| average 8 spectra | PtNiC_H3PO4_140C_Ni_K_10 | 180 |
| average 8 spectra | PtNiC_H3PO4_140C_Ni_K_11 | 198 |
| average 8 spectra | PtNiC_H3PO4_140C_Ni_K_12 | 216 |
| average 8 spectra | PtNiC_H3PO4_140C_Ni_K_13 | 240 |

## PtNiC\_dry\_Ni\_K

| #                  | Ni-Ni                                                                                   | Ni-Pt                                                                                   | R-factor filtered |
|--------------------|-----------------------------------------------------------------------------------------|-----------------------------------------------------------------------------------------|-------------------|
| R [Å]              |  2,546 |  2,626 | 18,7              |
| error              |  0,023 |  0,013 |                   |
| s [Å]              | 0,1*                                                                                    | 0,0741                                                                                  |                   |
| error (inaccurate) |                                                                                         | 0,023                                                                                   |                   |
| N                  |  2,76  |  3,19  |                   |
| error              |  0,58  |  1,8   |                   |
| 2s2                | 0,02*                                                                                   | 0,011                                                                                   |                   |
| error              |                                                                                         | 0,006                                                                                   |                   |

## PtNiC\_dry\_140C\_Ni\_K

| #                  | Ni-Ni                                                                                   | Ni-Pt                                                                                   | R-factor filtered |
|--------------------|-----------------------------------------------------------------------------------------|-----------------------------------------------------------------------------------------|-------------------|
| R [Å]              | 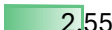 2,554 |  2,625 | 18,7              |
| error              |  0,024 |  0,018 |                   |
| s [Å]              | 0,1*                                                                                    | 0,0946                                                                                  |                   |
| error (inaccurate) |                                                                                         | 0,017                                                                                   |                   |
| N                  |  2,15  |  4,05  |                   |
| error              |  0,55  |  1,9   |                   |
| 2s2                | 0,02*                                                                                   | 0,0179                                                                                  |                   |
| error              |                                                                                         | 0,0062                                                                                  |                   |

## PtNiC\_H3PO4\_140C\_Ni\_K\_1

| #                  | Ni-Ni                                                                                     | Ni-Pt                                                                                     | R-factor filtered |
|--------------------|-------------------------------------------------------------------------------------------|-------------------------------------------------------------------------------------------|-------------------|
| R [Å]              | 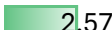 2,571 |  2,637 | 18,7              |
| error              |  0,021 |  0,015 |                   |
| s [Å]              | 0,1*                                                                                      | 0,0932                                                                                    |                   |
| error (inaccurate) |                                                                                           | 0,014                                                                                     |                   |
| N                  |  2,24  |  4,39  |                   |
| error              |  0,53  |  1,8   |                   |
| 2s2                | 0,02*                                                                                     | 0,0174                                                                                    |                   |
| error              |                                                                                           | 0,0052                                                                                    |                   |

## PtNiC\_H3PO4\_140C\_Ni\_K\_2

| #                  | Ni-Ni                                                                                     | Ni-Pt                                                                                     | R-factor filtered |
|--------------------|-------------------------------------------------------------------------------------------|-------------------------------------------------------------------------------------------|-------------------|
| R [Å]              | 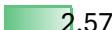 2,572 |  2,601 | 18,7              |
| error              |  0,015 |  0,018 |                   |
| s [Å]              | 0,1*                                                                                      | 0,101                                                                                     |                   |
| error (inaccurate) |                                                                                           | 0,013                                                                                     |                   |
| N                  |  3,31  |  4,75  |                   |
| error              |  0,61  |  1,8   |                   |
| 2s2                | 0,02*                                                                                     | 2,06E-02                                                                                  |                   |
| error              |                                                                                           | 0,0052                                                                                    |                   |

## PtNiC\_H3PO4\_140C\_Ni\_K\_3

| #     | Ni-Ni                                                                                     | Ni-Pt                                                                                     | R-factor filtered |
|-------|-------------------------------------------------------------------------------------------|-------------------------------------------------------------------------------------------|-------------------|
| R [Å] |  2,574 |  2,621 | 18,7              |
| error |  0,014 |  0,021 |                   |

|                    |       |        |
|--------------------|-------|--------|
| s [Å]              | 0,1*  | 0,115  |
| error (inaccurate) |       | 0,012  |
| N                  | 2,87  | 6,4    |
| error              | 0,59  | 2      |
| 2s2                | 0,02* | 0,0266 |
| error              |       | 0,0053 |

#### PtNiC\_H3PO4\_140C\_Ni\_K\_4

| #                  | Ni-Ni | Ni-Pt  | R-factor filtered |
|--------------------|-------|--------|-------------------|
| R [Å]              | 2,6   | 2,618  | 18,7              |
| error              | 0,016 | 0,014  |                   |
| s [Å]              | 0,1*  | 0,1    |                   |
| error (inaccurate) |       | 0,0093 |                   |
| N                  | 2,81  | 6,33   |                   |
| error              | 0,63  | 1,7    |                   |
| 2s2                | 0,02* | 0,0202 |                   |
| error              |       | 0,0037 |                   |

#### PtNiC\_H3PO4\_140C\_Ni\_K\_5

| #                  | Ni-Ni | Ni-Pt  | R-factor filtered |
|--------------------|-------|--------|-------------------|
| R [Å]              | 2,563 | 2,64   | 18,7              |
| error              | 0,016 | 0,02   |                   |
| s [Å]              | 0,1*  | 0,113  |                   |
| error (inaccurate) |       | 0,012  |                   |
| N                  | 2,82  | 6,38   |                   |
| error              | 0,57  | 2,1    |                   |
| 2s2                | 0,02* | 0,0253 |                   |
| error              |       | 0,0056 |                   |

#### PtNiC\_H3PO4\_140C\_Ni\_K\_6

| #                  | Ni-Ni | Ni-Pt  | R-factor filtered |
|--------------------|-------|--------|-------------------|
| R [Å]              | 2,589 | 2,627  | 18,7              |
| error              | 0,018 | 0,015  |                   |
| s [Å]              | 0,1*  | 0,103  |                   |
| error (inaccurate) |       | 0,0095 |                   |
| N                  | 2,43  | 6,65   |                   |
| error              | 0,61  | 1,8    |                   |
| 2s2                | 0,02* | 0,0213 |                   |
| error              |       | 0,0039 |                   |

#### PtNiC\_H3PO4\_140C\_Ni\_K\_7

| #                  | Ni-Ni | Ni-Pt  | R-factor filtered |
|--------------------|-------|--------|-------------------|
| R [Å]              | 2,59  | 2,613  | 18,7              |
| error              | 0,015 | 0,015  |                   |
| s [Å]              | 0,1*  | 0,0993 |                   |
| error (inaccurate) |       | 0,01   |                   |
| N                  | 3,07  | 5,65   |                   |
| error              | 0,61  | 1,7    |                   |

|       |       |        |
|-------|-------|--------|
| 2s2   | 0,02* | 0,0197 |
| error |       | 0,0041 |

#### PtNiC\_H3PO4\_140C\_Ni\_K\_8

| #                  | Ni-Ni | Ni-Pt  | R-factor filtered |
|--------------------|-------|--------|-------------------|
| R [Å]              | 2,592 | 2,617  | 18,7              |
| error              | 0,014 | 0,017  |                   |
| s [Å]              | 0,1*  | 0,104  |                   |
| error (inaccurate) |       | 0,011  |                   |
| N                  | 3,19  | 5,79   |                   |
| error              | 0,62  | 1,8    |                   |
| 2s2                | 0,02* | 0,0215 |                   |
| error              |       | 0,0044 |                   |

#### PtNiC\_H3PO4\_140C\_Ni\_K\_9

| #                  | Ni-Ni | Ni-Pt  | R-factor filtered |
|--------------------|-------|--------|-------------------|
| R [Å]              | 2,573 | 2,613  | 18,7              |
| error              | 0,017 | 0,015  |                   |
| s [Å]              | 0,1*  | 0,0959 |                   |
| error (inaccurate) |       | 0,012  |                   |
| N                  | 2,9   | 5,01   |                   |
| error              | 0,580 | 1,800  |                   |
| 2s2                | 0,02* | 0,018  |                   |
| error              |       | 0,0045 |                   |

#### PtNiC\_H3PO4\_140C\_Ni\_K\_10

| #                  | Ni-Ni | Ni-Pt  | R-factor filtered |
|--------------------|-------|--------|-------------------|
| R [Å]              | 2,568 | 2,632  | 18,7              |
| error              | 0,014 | 0,02   |                   |
| s [Å]              | 0,1*  | 0,11   |                   |
| error (inaccurate) |       | 0,013  |                   |
| N                  | 3,12  | 5,91   |                   |
| error              | 0,58  | 2      |                   |
| 2s2                | 0,02* | 0,0244 |                   |
| error              |       | 0,0055 |                   |

#### PtNiC\_H3PO4\_140C\_Ni\_K\_11

| #                  | Ni-Ni | Ni-Pt  | R-factor filtered |
|--------------------|-------|--------|-------------------|
| R [Å]              | 2,58  | 2,614  | 18,7              |
| error              | 0,014 | 0,015  |                   |
| s [Å]              | 0,1*  | 0,0983 |                   |
| error (inaccurate) |       | 0,011  |                   |
| N                  | 3,12  | 5,21   |                   |
| error              | 0,56  | 1,7    |                   |
| 2s2                | 0,02* | 0,0193 |                   |
| error              |       | 0,0042 |                   |

#### PtNiC\_H3PO4\_140C\_Ni\_K\_12

| #                  | Ni-Ni                       | Ni-Pt                       | R-factor filtered |
|--------------------|-----------------------------|-----------------------------|-------------------|
| R [Å]              | <div><div></div>2,541</div> | <div><div></div>2,664</div> | 18,7              |
| error              | <div><div></div>0,022</div> | <div><div></div>0,016</div> |                   |
| s [Å]              | 0,1*                        | <div><div></div>0,112</div> |                   |
| error (inaccurate) |                             | <div><div></div>0,012</div> |                   |
| N                  | <div><div></div>1,81</div>  | <div><div></div>7,24</div>  |                   |
| error              | <div><div></div>0,53</div>  | <div><div></div>2,2</div>   |                   |
| 2s2                | 0,02*                       | 0,0249                      |                   |
| error              |                             | 0,0053                      |                   |

#### PtNiC\_H3PO4\_140C\_Ni\_K\_13

| #                  | Ni-Ni                       | Ni-Pt                        | R-factor filtered |
|--------------------|-----------------------------|------------------------------|-------------------|
| R [Å]              | <div><div></div>2,586</div> | <div><div></div>2,62</div>   | 18,7              |
| error              | <div><div></div>0,017</div> | <div><div></div>0,017</div>  |                   |
| s [Å]              | 0,1*                        | 0,109                        |                   |
| error (inaccurate) |                             | 0,0098                       |                   |
| N                  | <div><div></div>2,55</div>  | <div><div></div>7,03</div>   |                   |
| error              | <div><div></div>0,63</div>  | <div><div></div>1,9</div>    |                   |
| 2s2                | 0,02*                       | <div><div></div>0,0238</div> |                   |
| error              |                             | 0,0042                       |                   |

S02 = 0,78

Time (min)

| Sample            |                          |     |
|-------------------|--------------------------|-----|
|                   | PtNiC_dry_Ni_K           | 0   |
|                   | PtNiC_dry_180C_Ni_K      | 0   |
| average 8 spectra | PtNiC_H3PO4_180C_Ni_K_1  | 18  |
| average 8 spectra | PtNiC_H3PO4_180C_Ni_K_2  | 36  |
| average 8 spectra | PtNiC_H3PO4_180C_Ni_K_3  | 54  |
| average 8 spectra | PtNiC_H3PO4_180C_Ni_K_4  | 72  |
| average 8 spectra | PtNiC_H3PO4_180C_Ni_K_5  | 90  |
| average 8 spectra | PtNiC_H3PO4_180C_Ni_K_6  | 108 |
| average 8 spectra | PtNiC_H3PO4_180C_Ni_K_7  | 126 |
| average 8 spectra | PtNiC_H3PO4_180C_Ni_K_8  | 144 |
| average 8 spectra | PtNiC_H3PO4_180C_Ni_K_9  | 162 |
| average 8 spectra | PtNiC_H3PO4_180C_Ni_K_10 | 180 |
| average 8 spectra | PtNiC_H3PO4_180C_Ni_K_11 | 198 |
| average 8 spectra | PtNiC_H3PO4_180C_Ni_K_12 | 216 |
| average 8 spectra | PtNiC_H3PO4_180C_Ni_K_13 | 240 |

## PtNiC\_dry\_Ni\_K

| #                  | Ni-Ni                                                                                   | Ni-Pt                                                                                   | R-factor filtered |
|--------------------|-----------------------------------------------------------------------------------------|-----------------------------------------------------------------------------------------|-------------------|
| R [Å]              |  2,545 |  2,629 | 12,34             |
| error              |  0,023 |  0,012 |                   |
| s [Å]              | 0,1*                                                                                    | 0,072                                                                                   |                   |
| error (inaccurate) |                                                                                         | 0,023                                                                                   |                   |
| N                  |  2,55  |  3,1   |                   |
| error              |  0,58  |  1,7   |                   |
| 2s2                | 0,02*                                                                                   | 0,010                                                                                   |                   |
| error              |                                                                                         | 0,006                                                                                   |                   |

## PtNiC\_dry\_180C\_Ni\_K

| #                  | Ni-Ni                                                                                   | Ni-Pt                                                                                   | R-factor filtered |
|--------------------|-----------------------------------------------------------------------------------------|-----------------------------------------------------------------------------------------|-------------------|
| R [Å]              | 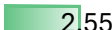 2,559 |  2,626 | 12,34             |
| error              |  0,032 |  0,018 |                   |
| s [Å]              | 0,1*                                                                                    | 0,0938                                                                                  |                   |
| error (inaccurate) |                                                                                         | 0,016                                                                                   |                   |
| N                  |  1,62  |  4,22  |                   |
| error              |  0,57  |  2     |                   |
| 2s2                | 0,02*                                                                                   | 0,0176                                                                                  |                   |
| error              |                                                                                         | 0,006                                                                                   |                   |

## PtNiC\_H3PO4\_180C\_Ni\_K\_1

| #                  | Ni-Ni                                                                                     | Ni-Pt                                                                                     | R-factor filtered |
|--------------------|-------------------------------------------------------------------------------------------|-------------------------------------------------------------------------------------------|-------------------|
| R [Å]              |  2,589 |  2,616 | 12,34             |
| error              |  0,016 |  0,014 |                   |
| s [Å]              | 0,1*                                                                                      | 0,0982                                                                                    |                   |
| error (inaccurate) |                                                                                           | 0,01                                                                                      |                   |
| N                  |  3,06  |  5,87  |                   |
| error              |  0,62  |  1,8   |                   |
| 2s2                | 0,02*                                                                                     | 0,0193                                                                                    |                   |
| error              |                                                                                           | 0,0039                                                                                    |                   |

## PtNiC\_H3PO4\_180C\_Ni\_K\_2

| #                  | Ni-Ni                                                                                     | Ni-Pt                                                                                     | R-factor filtered |
|--------------------|-------------------------------------------------------------------------------------------|-------------------------------------------------------------------------------------------|-------------------|
| R [Å]              |  2,582 |  2,63  | 12,34             |
| error              |  0,017 |  0,016 |                   |
| s [Å]              | 0,1*                                                                                      | 0,108                                                                                     |                   |
| error (inaccurate) |                                                                                           | 0,0096                                                                                    |                   |
| N                  |  2,38  |  6,93  |                   |
| error              |  0,59  |  1,9   |                   |
| 2s2                | 0,02*                                                                                     | 2,34E-02                                                                                  |                   |
| error              |                                                                                           | 0,0042                                                                                    |                   |

## PtNiC\_H3PO4\_180C\_Ni\_K\_3

| #     | Ni-Ni                                                                                     | Ni-Pt                                                                                     | R-factor filtered |
|-------|-------------------------------------------------------------------------------------------|-------------------------------------------------------------------------------------------|-------------------|
| R [Å] |  2,59  |  2,606 | 12,34             |
| error |  0,013 |  0,017 |                   |



|                    |       |        |
|--------------------|-------|--------|
| s [Å]              | 0,1*  | 0,108  |
| error (inaccurate) |       | 0,01   |
| N                  | 3,27  | 6,19   |
| error              | 0,62  | 1,8    |
| 2s2                | 0,02* | 0,0234 |
| error              |       | 0,0045 |

#### PtNiC\_H3PO4\_180C\_Ni\_K\_4

| #                  | Ni-Ni | Ni-Pt  | R-factor filtered |
|--------------------|-------|--------|-------------------|
| R [Å]              | 2,577 | 2,621  | 12,34             |
| error              | 0,015 | 0,02   |                   |
| s [Å]              | 0,1*  | 0,113  |                   |
| error (inaccurate) |       | 0,011  |                   |
| N                  | 2,65  | 6,71   |                   |
| error              | 0,6   | 1,9    |                   |
| 2s2                | 0,02* | 0,0257 |                   |
| error              |       | 0,0049 |                   |

#### PtNiC\_H3PO4\_180C\_Ni\_K\_5

| #                  | Ni-Ni | Ni-Pt  | R-factor filtered |
|--------------------|-------|--------|-------------------|
| R [Å]              | 2,576 | 2,615  | 12,34             |
| error              | 0,014 | 0,021  |                   |
| s [Å]              | 0,1*  | 0,116  |                   |
| error (inaccurate) |       | 0,011  |                   |
| N                  | 2,98  | 6,69   |                   |
| error              | 0,62  | 2      |                   |
| 2s2                | 0,02* | 0,027  |                   |
| error              |       | 0,0053 |                   |

#### PtNiC\_H3PO4\_180C\_Ni\_K\_6

| #                  | Ni-Ni | Ni-Pt  | R-factor filtered |
|--------------------|-------|--------|-------------------|
| R [Å]              | 2,577 | 2,621  | 12,34             |
| error              | 0,016 | 0,021  |                   |
| s [Å]              | 0,1*  | 0,113  |                   |
| error (inaccurate) |       | 0,011  |                   |
| N                  | 2,75  | 6,65   |                   |
| error              | 0,64  | 2      |                   |
| 2s2                | 0,02* | 0,0255 |                   |
| error              |       | 0,0051 |                   |

#### PtNiC\_H3PO4\_180C\_Ni\_K\_7

| #                  | Ni-Ni | Ni-Pt  | R-factor filtered |
|--------------------|-------|--------|-------------------|
| R [Å]              | 2,586 | 2,606  | 12,34             |
| error              | 0,014 | 0,016  |                   |
| s [Å]              | 0,1*  | 0,107  |                   |
| error (inaccurate) |       | 0,0098 |                   |
| N                  | 3,12  | 6,48   |                   |
| error              | 0,62  | 1,8    |                   |

|       |       |        |
|-------|-------|--------|
| 2s2   | 0,02* | 0,0231 |
| error |       | 0,0042 |

#### PtNiC\_H3PO4\_180C\_Ni\_K\_8

| #                  | Ni-Ni                                                                                   | Ni-Pt                                                                                   | R-factor filtered |
|--------------------|-----------------------------------------------------------------------------------------|-----------------------------------------------------------------------------------------|-------------------|
| R [Å]              |  2,575 |  2,629 | 12,34             |
| error              |  0,015 |  0,021 |                   |
| s [Å]              | 0,1*                                                                                    |  0,117 |                   |
| error (inaccurate) |                                                                                         |  0,011 |                   |
| N                  |  2,64  |  7,1   |                   |
| error              |  0,6   |  2     |                   |
| 2s2                | 0,02*                                                                                   | 0,0273                                                                                  |                   |
| error              |                                                                                         | 0,0051                                                                                  |                   |

#### PtNiC\_H3PO4\_180C\_Ni\_K\_9

| #                  | Ni-Ni                                                                                   | Ni-Pt                                                                                   | R-factor filtered |
|--------------------|-----------------------------------------------------------------------------------------|-----------------------------------------------------------------------------------------|-------------------|
| R [Å]              |  2,582 |  2,622 | 12,34             |
| error              | 0,015                                                                                   | 0,022                                                                                   |                   |
| s [Å]              | 0,1*                                                                                    | 0,116                                                                                   |                   |
| error (inaccurate) |                                                                                         |  0,012 |                   |
| N                  |  2,81  |  6,91  |                   |
| error              | 0,660                                                                                   | 2,100                                                                                   |                   |
| 2s2                | 0,02*                                                                                   | 0,027                                                                                   |                   |
| error              |                                                                                         | 0,0055                                                                                  |                   |

#### PtNiC\_H3PO4\_180C\_Ni\_K\_10

| #                  | Ni-Ni                                                                                     | Ni-Pt                                                                                     | R-factor filtered |
|--------------------|-------------------------------------------------------------------------------------------|-------------------------------------------------------------------------------------------|-------------------|
| R [Å]              |  2,588 |  2,608 | 12,34             |
| error              |  0,015 |  0,017 |                   |
| s [Å]              | 0,1*                                                                                      |  0,105 |                   |
| error (inaccurate) |                                                                                           |  0,011 |                   |
| N                  |  3,17  |  5,88  |                   |
| error              |  0,65  |  1,8   |                   |
| 2s2                | 0,02*                                                                                     |  0,022 |                   |
| error              |                                                                                           | 0,0046                                                                                    |                   |

#### PtNiC\_H3PO4\_180C\_Ni\_K\_11

| #                  | Ni-Ni                                                                                     | Ni-Pt                                                                                     | R-factor filtered |
|--------------------|-------------------------------------------------------------------------------------------|-------------------------------------------------------------------------------------------|-------------------|
| R [Å]              |  2,583 |  2,619 | 12,34             |
| error              |  0,014 |  0,019 |                   |
| s [Å]              | 0,1*                                                                                      |  0,112 |                   |
| error (inaccurate) |                                                                                           |  0,01  |                   |
| N                  |  2,82  |  6,7   |                   |
| error              |  0,61  |  1,9   |                   |
| 2s2                | 0,02*                                                                                     | 0,0251                                                                                    |                   |
| error              |                                                                                           | 0,0046                                                                                    |                   |

#### PtNiC\_H3PO4\_180C\_Ni\_K\_12

| #                  | Ni-Ni | Ni-Pt  | R-factor filtered |
|--------------------|-------|--------|-------------------|
| R [Å]              | 2,583 | 2,622  | 12,34             |
| error              | 0,016 | 0,018  |                   |
| s [Å]              | 0,1*  | 0,108  |                   |
| error (inaccurate) |       | 0,011  |                   |
| N                  | 2,88  | 6,26   |                   |
| error              | 0,63  | 1,9    |                   |
| 2s2                | 0,02* | 0,0231 |                   |
| error              |       | 0,0047 |                   |

#### PtNiC\_H3PO4\_180C\_Ni\_K\_13

| #                  | Ni-Ni | Ni-Pt  | R-factor filtered |
|--------------------|-------|--------|-------------------|
| R [Å]              | 2,589 | 2,608  | 12,34             |
| error              | 0,014 | 0,017  |                   |
| s [Å]              | 0,1*  | 0,106  |                   |
| error (inaccurate) |       | 0,011  |                   |
| N                  | 3,23  | 5,82   |                   |
| error              | 0,61  | 1,7    |                   |
| 2s2                | 0,02* | 0,0225 |                   |
| error              |       | 0,0045 |                   |
